# Supplementary material for: Microbial Signatures in Deep CO2-Saturated Miocene Sediments of the Active Hartoušov Mofette System (NW Czech Republic)
Source: Front Microbiol. 2020 Dec 14;11:543260. doi: 10.3389/fmicb.2020.543260 (PMC7768021; doi:10.3389/fmicb.2020.543260)
Supplement: Supplementary file 1 [file Data_Sheet_1.xlsx]

## Sheet: All DATA
Average-Depth (mbs)	65.15	65.65	66.65	67.6	68.41	69.06	70.11	70.66	70.96	71.91	76.23	76.53	77.19	78.17	78.45	78.55	79.15	79.45	80.15	81.15	82.15	83.15	84.19	84.49	85.09	87.15	88.45	89.15	90.15	90.45	92.15	92.45	93.9	94.65	Groundwater 5PM	Groundwater 8PM
TIC%	0.405175	1.40746	2.77608	2.28146	2.90034	1.51928	2.49203	0.522201	2.41707	0.17725	0.876573	0.502762	0.540913	0.186015	0.120512	6.47465	0.0273431	0.214061	0.210942	2.14217	4.33272	3.76551	2.98851	2.76682	3.10288	2.87013	2.4568	3.14222	1.83675	3.20636	1.07608	1.11579	0.968164	0.214004
TOC %	2.31629	5.52933	8.96017	7.6698	10.0015	6.95082	5.13498	6.24169	9.21889	4.63124	6.83268	5.25201	3.51267	4.03333	3.20269	2.72072	2.27654	1.68741	1.42608	0.712393	0.698548	1.00886	1.14096	1.39619	1.08349	1.06095	1.38702	0.94346	0.281037	0.179881	0.0675282	0.070809	0.0983749	0.0320674
d13Corg‰	-26.672	-28.979	-28.576	-27.021	-28.236	-27.354	-27.665	-29.949	-30.126	-28.37	-29.841	-31.339	-30.889	-30.374	-28.835	-28.216	-25.967	-26.125	-24.355	-24.475	-24.777	-24.615	-24.781	-24.755	-24.882	-25.014	-25.106	-25.069	-24.536	-24.827	-24.844	-25.595	-24.238	-26.462
TN %	0.0883292	0.171832	0.238177	0.262725	0.322358	0.236532	0.135353	0.170618	0.260176	0.148035	0.182009	0.13726	0.0985746	0.12976	0.103504	0.0812778	0.036171	0.0309425	0.0278771	0.0139695	0.0121037	0.0223868	0.0250998	0.028271	0.0233794	0.014156	0.0275345	0.0156249	<0,01	<0,01	<0,01	<0,01	<0,01	<0,01
TOC/TN	26.2233	32.1787	37.6199	29.1933	31.026	29.3863	37.9375	36.5828	35.4332	31.2847	37.5403	38.2632	35.6346	31.0831	30.9426	33.4743	62.9383	54.5337	51.1561	50.9963	57.7136	45.065	45.4569	49.3859	46.344	74.9468	50.3738	60.3818
22,29,30-trisnor17(21)ene (µg/gSed)	0.508678				0.280363			0.09275		0.132426	0.536453		0.465684	0.178851			0.405488	0	0	0	0		0		0	0		0	0			0	0
bb-C27 hopane (µg/gSed)	3.35002				4.0512			0.762073		2.3731	2.85171		5.43758	1.03522			4.7448	1.94738	0.624003	0.158306	0.081172		0.0687509		0.0815195	0.0893484		0.0176443	0.0518946			0.00917479	0.044291
30-norhop-17(21)-ene (µg/gSed)	0.982848				0			0.130532		0.490291	1.01264		2.42645	0.990435			0	0	0	0	0		0		0	0		0	0			0	0
Hop-17(21)-ene (µg/gSed)	5.70239				2.0326			8.34382		9.04567	14.7511		39.523	8.32919			2.44824	1.83268	0.538978	0.120773	0.0948442		0.132252		0.124501	0.119846		0.290921	0.02276			0	0.0673306
ba-C29 hopane (µg/gSed)	1.15612				0.774339			0.109023		0.431318	0.426892		1.15463	0.270293			1.18873	0.625243	0.219264	0.0620698	0.0353496		0.0371076		0.0268722	0.0370997		0.0877357	0.0216402			0	0
ab-C30 hopane (µg/gSed)	0.325738				0.301368			0		0.60031	0.410227		1.12688	0.129721			0.272944	0.171825	0.0701284	0.0150687	0.0085708		0.00854191		0.0132937	0.0152508		0.0256651	0.00890848			0	0
Neohop-13(18)-ene (µg/gSed)	0.557306				0.16105			0.378059		0.212467	0.491312		2.5217	0.937787			0.267997	0.464848	0.127844	0.0236237	0.0133097		0.0263333		0.0260061	0.0200623		0.0405082	0.0416704			0	0
bb-C29 hopane (µg/gSed)	1.82774				1.34787			0.497125		1.39202	1.57083		3.12487	0.606958			3.06459	1.31855	0.559186	0.135996	0.0674592		0.0692491		0.0759113	0.0991812		0.23541	0.0656297			0	0.0193122
ab-C31S hopane (µg/gSed)	0				1.03543			0.374458		0.652673	0.59202		1.18086	0.480752			3.82152	0.838757	0.144863	0.0396531	0.0207782		0.0308082		0.0344272	0.0481249		0.0673986	0			0	0
ab-C31R hopane (µg/gSed)	0.474778				3.36238			2.00572		1.8499	0.573363		0.134538	0.0465983			111.523	19.2308	2.75307	0.77108	0.557563		1.37385		1.4302	1.51812		2.6751	0.555333			0.131482	0.124467
ba-C31 hopane (µg/gSed)	0.170432				1.41756			0.756521		0.564851	0.211385		0.390649	0.0728251			1.99564	0.438963	0.125752	0.0344939	0.0168102		0.0403215		0.0412865	0.0497541		0.0712743	0			0	0
bb-C30 hopane (µg/gSed)	0.605919				0.393116			0.127678		0.414389	0.663235		0.911561	0.191457			0.336371	0.242277	0.122521	0.0200565	0.0123617		0.0195193		0.0319769	0.0436172		0.0790454	0			0	0
bb-C31 hopane (µg/gSed)	2.06323				2.1495			0.678156		2.12145	2.69274		3.27403	1.19912			3.54187	1.0176	0.431702	0.122405	0.077343		0.152198		0.156308	0.198906		0.361008	0.0879609			0	0
d13C bb-C27 (‰)					-21.3247					-22.0497							-29.706
d13C Hop-17(21)-ene (‰)	-47.6773							-58.8547		-45.5247	-56.0153		-57.168	-41.2727			-32.296	-34.2693	-32.4217		-33.7363		-34.3387		-35.472	-35.1713		-35.6973
d13C ba-C29 (‰)													-51.8077
d13C Neohop-13(18)-ene (‰)	-51.7747									-55.5367	-57.0597		-60.877				-32.053	-33.85	-32.6663						-37.4847			-35.3537
d13C bb-C29 (‰)					-56.6933			-59.7457		-47.2937
d13C ab-C31R (‰)																	-22.1223	-23.9813
d13C bb-C30 (‰)	-55.368
d13C bb-C31 (‰)	-48.8827				-58.455			-60.3387		-48.974	-51.7273		-55.4707	-43.2653			-25.8903	-28.636	-30.963				-30.6347		-31.5743	-31.0457		-30.6303
Archaeol (ng/gSed)	26.2147		34.8364		66.9164			21.1115		8.0107	52.901		15.5732	26.4714			8.4045	28.3248	1.55783	0.27447	0.457947		0.905994		0.54378	0.524316		0.781474	0.300002			0.238667	0.174298
GDGT-0 (ng/gSed)	202.515		95.9352		558.596			286.003		279.559	242.155		90.6559	108.249			10.908	54.3109	20.7876	0.604817	2.80606		7.54624		5.23296	3.11721		8.26449	0.0228153			0.00522686	0.00919969
GDGT-1 (ng/gSed)	24.0789		11.1211		82.4413			28.1992		45.6134	52.3898		14.3458	13.3386			4.25698	12.7481	5.68727	0.086495	0.995291		2.3181		1.65192	0.9068		2.4992	0			0	0
GDGT-2 (ng/gSed)	3.83334		4.62317		9.27775			5.10135		5.16149	4.44265		4.22776	3.92119			2.54148	10.3917	5.72263	0.0531347	0.740245		1.95587		1.43037	0.825414		2.43026	0			0	0
GDGT-3 (ng/gSed)	0.660184		0.318227		3.49101			2.56658		1.67072	1.15295		1.11677	1.0091			2.08625	6.4807	3.37259	0.0242019	0.422183		1.73706		1.3071	0.981381		2.83174	0			0	0
GDGT-4 (ng/gSed)	0.4334		0.237526		2.68065			4.31666		1.45236	0.628724		0.951913	0.994456			1.48181	3.21974	1.24756	0.0102936	0.235601		1.22133		1.01636	0.681028		1.92228	0			0	0
Crenarchaeol (ng/gSed)	0.884598		0.355642		3.40739			10.3225		1.89341	1.00279		0.88136	1.11786			0.725983	1.33819	0.612367	0	0.0619004		0.214741		0.196197	0.0775731		0.27539	0			0	0
Crenarchaeol regio-isomer (ng/gSed)	0.23115		0.0706796		0.99592			0.436062		0.547285	0.181609		0.168904	0.204996			0	0.226882	0	0	0		0.0255818		0.0177177	0.00936263		0.0365181	0			0	0
GDGT-III (ng/gSed)	50.3537		26.253		219.308			81.5369		92.5033	129.974		43.0213	58.0804			0	16.5357	16.4554	0.0498179	0.259767		0.6647		0.557679	0.257625		0.886127	0			0	0
GDGT-IIIa (ng/gSed)	0		0		0			0		0	0		0	0			0	0	0.603948	0	0		0		0	0		0	0			0	0
GDGT-IIIb (ng/gSed)	0		0		0			0		0	0		0	0			0	0	0.247154	0	0		0		0	0		0	0			0	0
GDGT-II (ng/gSed)	51.3695		28.0901		251.695			87.7555		98.9927	141.8		47.8123	65.9071			14.6236	90.322	41.1433	0.0768078	0.804798		2.28636		2.05746	1.13081		5.02368	0			0	0
GDGT-Ila (ng/gSed)	0		0		0			0		0	0		0	0			0	12.6437	5.59534	0	0.095394		0.1801		0.18602	0.0898163		0.401279	0			0	0
GDGT-Ilb (ng/gSed)	0		0		0			0		0	0		0	0			0	11.1234	3.59256	0	0.0358324		0.0646178		0.0687431	0.0333751		0.158449	0			0	0
GDGT-I (ng/gSed)	76.074		49.6611		462.212			178.902		168.642	253.401		108.646	154.187			44.2788	197.788	61.0594	0.126129	1.21189		4.39512		3.79458	2.43427		11.9229	0.0229436			0	0.014137
GDGT-Ia (ng/gSed)	1.19222		1.49326		14.3159			6.5298		6.58924	4.55218		4.63069	5.95845			4.81905	36.5755	15.0096	0	0.160176		0.492429		0.507623	0.29402		1.44258	0			0	0
GDGT-Ib (ng/gSed)	0.457897		0.412656		3.77248			2.00882		1.00048	1.05636		1.11094	1.41226			2.19243	17.58	6.21218	0	0.0525605		0.199736		0.207262	0.122471		0.493763	0			0	0
Compound A (µg/gSed)	8.80593		59.5289		59.518			116.004		5.97504	80.6268		101.58	88.4636			130.267	475.195	33.8671	1.41176			1.04078		1.42785	1.63429		7.60724	0.522975			0	0
Compound B (µg/gSed)	1.64533		30.5579		26.4206			15.7635		1.37838	50.1369		27.0946	47.912			15.6445	106.817	3.8368	0			0.223922		0.436488	0.14723		0	0			0	0
bact. gene copies (copy numbers / g wet sed)			88869.2		36117.2			15980.8											224530	384404	545507		217583		59838.6							70345.8	215556		34900000	88800000
Shannon_H	3.35397	3.57786	3.09014		3.20969	3.83079	2.62041	2.92924	3.67107	3.60431	3.07941	3.2368	4.20259	3.47497	4.64774		4.5208	3.97149	4.26275	4.44941	4.21077		3.82367		4.20098	3.92552		3.7912	3.89526			4.12303	4.25688		3.27214	3.28667
Evenness_e^H/S	0.2151	0.2485	0.1332		0.207	0.3341	0.14345	0.12775	0.259	0.27495	0.16565	0.16325	0.3158	0.2221	0.359		0.3884	0.2531	0.35565	0.42415	0.3069		0.24345		0.26545	0.26395		0.21245	0.34935			0.2792	0.3757		0.18705	0.2131
Crenarchaeota (%)	4.22413	0.35293	0.0327892		0.131933	1.59082	0.283916	0.00272388	6.03227	0.0644081	0.214948	0.213533	14.8306	0.407163	0.78118		0.58235	0.758593	0.573519	0.226672	0.492154		0.0175075		0.0570032	0.859784		0.0659483	0			0.143191	0.777139		0.0755622	0.0084717
Halobacterota (%)	0	0.215377	0.01051		0.639854	0.445451	0.0940572	0	0	0	0.231262	0.653648	2.40943	5.96946	0		0.00237219	0	0.976108	0.0650509	0.0982061		0		0.00396618	0		0.292198	0			0.116891	0		0	0
Nanoarchaeota (%)	0	0	0.00416435		0.000900341	0.0131597	0.0449485	0	0.00405416	0.0122436	0	0.00408822	0.0193551	0	0.307752		1.35628	0.00382599	0	1.97997	0.144613		0.0471284		5.52392	0.52053		0.017982	0.578879			3.22939	0.666089		0	0
Actinobacteriota (%)	10.5525	9.4591	0.859481		6.37123	22.6209	7.16366	0.922908	18.4258	18.811	3.28779	8.76351	4.63119	4.48194	9.66779		22.867	14.5625	26.2132	27.4308	22.5103		16.7108		25.3956	15.2901		14.1496	11.3051			11.9022	8.45743		0.208698	0.149947
Bacteroidota (%)	2.3804	4.77273	3.95446		2.15161	6.96189	1.39932	2.94906	6.95706	5.24768	2.12355	0.565507	3.38516	0.694423	16.2574		8.82221	6.83132	4.10508	7.55701	4.70715		5.7942		11.4197	17.3191		8.40141	9.5186			9.77834	5.71502		3.38268	6.32128
Campilobacterota (%)	2.20563	0.952375	7.14823		3.11076	1.48677	4.26509	5.85855	3.40384	1.29755	4.73149	0.427431	5.65415	2.44588	2.74493		0.309385	1.75393	1.82867	0.11608	0.869252		0.524762		0.437177	0.133764		0.397103	0.895475			0.769103	2.18664		4.263	4.85991
Firmicutes (%)	4.05492	11.5221	0.552246		2.7441	9.79219	1.07501	0.724692	2.60169	4.26265	1.70724	28.3602	5.63539	14.8522	8.44844		15.9904	8.31244	10.139	17.3133	4.18923		6.92584		2.01407	8.97984		19.9072	7.68557			17.9937	5.54591		2.23204	2.40502
Patescibacteria (%)	0.116546	0.0496249	0.0530261		0.0798489	0.0746407	0.537118	0.0821189	0.210113	0.138473	0.0315134	0.0801114	0.232012	2.04997	4.75057		6.12776	3.43797	1.17704	2.13992	0.577843		1.56438		15.2238	8.07049		2.4343	3.89297			6.32156	16.328		0.16741	0.888329
Alphaproteobacteria (%)	23.4656	14.8109	4.46703		13.5893	15.4279	45.3878	3.43706	10.2669	8.97394	8.74945	8.34777	9.57494	14.3804	9.86243		12.4626	14.3076	7.83602	11.0833	11.4817		25.2584		17.4614	16.1769		13.5496	10.7127			7.8016	12.5002		3.11372	2.84805
Gammaproteobacteria (%)	52.3494	52.3781	81.3671		69.4518	36.8923	37.2899	85.387	45.2744	53.9973	77.8508	50.5459	38.0407	49.2755	37.0115		25.1679	45.4676	38.821	25.7895	43.7634		35.8148		16.5206	22.1007		31.7988	45.7445			28.9966	33.8353		83.0651	79.1295
Others (%)	0.650787	5.70211	1.56561		2.36948	5.15269	2.59821	0.635898	6.82792	7.207	1.30321	2.69606	18.0159	11.4125	10.4758		7.67034	4.5681	9.30643	8.34339	11.409		7.38928		11.4706	11.0693		9.29595	10.2451			16.2936	14.6544		3.49181	3.38952
Comamonadaceae;g__ Other (%)	3.76591	4.66689	14.8411		17.394	3.23446	7.25352	17.4955	7.03301	7.65699	15.3781	9.59665	5.27017	8.38796	8.22545		4.16383	7.36016	3.75495	3.53494	4.00001		6.03411		5.85246	3.79721		3.28103	4.56185			3.05183	5.29918		42.7879	38.8963
Comamonadaceae;g__Acidovorax (%)	5.88062	8.14542	23.0931		17.0806	5.58937	7.00835	21.3898	8.62644	4.24207	20.6784	4.13355	7.16345	8.77767	7.60673		1.17305	4.00314	5.34325	1.88538	2.70863		2.52442		1.08237	3.64433		1.39816	4.30276			3.03933	3.8018		7.96214	8.65039
Comamonadaceae;g__Aquabacterium (%)	5.18618	13.3176	20.545		14.7394	3.8146	6.73367	25.7062	6.25943	5.46411	22.4514	2.20193	9.46218	4.35879	6.64251		0.95727	2.81213	3.53881	0.238844	1.12889		1.32656		0.75214	0.434402		0.712387	2.43831			0.797237	0.842764		1.78572	1.82907
Moraxellaceae;g__Acinetobacter (%)	3.14725	0.599239	0.300457		1.14641	6.03109	1.48421	1.49579	0.578223	3.15106	0.262043	2.76028	1.15126	6.15067	0.760451		2.67969	4.1942	2.44751	3.08798	10.0311		1.90905		0.224593	2.67107		5.9926	14.5122			4.03935	2.98377		0.129968	0.202864
Pseudomonadaceae;g__Pseudomonas (%)	17.4659	7.08176	3.01889		4.74635	1.21124	3.73648	1.48059	3.53073	1.32276	3.02836	15.856	2.00964	10.9468	2.13432		2.27209	12.5357	1.74333	1.58889	1.27312		2.4976		1.32361	0.583008		11.174	3.51944			1.94941	6.16552		2.04888	2.29573
Corynebacteriaceae;g__ Corynebacterium (%)	1.22516	1.10365	0.0948131		3.01266	13.5489	5.00757	0.547144	9.59039	5.46072	1.07717	4.93489	0.983717	1.00708	2.78951		12.7071	8.19397	9.21646	11.9525	6.48237		2.26682		8.04583	4.4458		5.07651	6.57165			5.2152	0.84096		0.00513954	0.0263183
Rhodobacteraceae;g__ Paracoccus (%)	3.45359	1.32372	0.579042		1.62245	3.39098	40.0351	0.667397	0.63809	1.06928	0.0497756	0.177203	0.10486	3.59244	1.69131		1.7204	5.75851	1.33093	0.421722	1.09779		5.13745		0.199623	4.07151		0.115187	1.00281			0.343652	1.1183		0	0
Comamonadaceae;g__Hydrogenophaga (%)	1.63768	0.585168	5.56322		5.75525	3.87132	3.78217	7.56284	2.42356	3.59136	5.44698	0.425485	0.526279	1.55029	1.30262		0.219782	1.82656	2.30581	0.0508706	0.413942		0.519604		0.289327	0.158178		0.454852	0.759975			0.269428	0.319107		0.207572	0.25008
Sulfurimonadaceae;g__Sulfuricurvum (%)	2.10154	0.932764	6.77792		3.09951	1.48677	4.1901	5.71292	3.33426	1.21509	4.68015	0.423342	5.04837	2.41449	2.72917		0.237283	1.66175	1.78704	0.0590769	0.822877		0.499518		0.427156	0.133764		0.362986	0.895475			0.707085	2.16332		1.56356	1.56662
Sulfurimonadaceae;g__Sulfuricurvum (%)	2.10154	0.932764	6.77792		3.09951	1.48677	4.1901	5.71292	3.33426	1.21509	4.68015	0.423342	5.04837	2.41449	2.72917		0.237283	1.66175	1.78704	0.0590769	0.822877		0.499518		0.427156	0.133764		0.362986	0.895475			0.707085	2.16332		1.56356	1.56662
Sulfurimonadaceae;g__Sulfurimonas (%)	0.104095	0.0196104	0.335325		0.0112543	0	0.0601174	0.137912	0.0695825	0.0792386	0.0498267	0	0.0335515	0.0196202	0.00119315		0.00307768	0.092182	0	0	0.0349177		0.025244		0.00843526	0		0.0204531	0			0.047244	0.0233131		2.6644	3.26404
Methanosaetaceae;g__Methanosaeta (%)	0	0.200781	0.01051		0	0	0.0120196	0	0	0	0	0.191124	1.40604	3.38483	0		0	0	0	0	0.0392824		0		0	0		0	0			0.108124	0		0	0
Methanosarcinaceae;g__Methanosarcina (%)	0	0	0		0.0130582	0	0	0	0	0	0.228997	0.406808	0.969366	2.58463	0		0.00237219	0	0	0	0.0589237		0		0.00396618	0		0.201553	0			0.0087668	0		0	0
Gallionellaceae;g__Gallionella (%)	0	0	0.0874811		0	0	0.0781662	0	0	0	0.0484025	0.246007	4.14657	0.155882	0		0	0	0	0	0.0416895		0		0.0262087	0		0.0480769	0			0.0789012	0		1.19168	1.60509

## Sheet: DATA Corr-Ma
Average-Depth (mbs)	65.15	68.41	70.66	71.91	76.23	77.19	78.17	79.15	79.45	80.15	81.15	82.15	84.19	85.09	87.15	89.15	90.15	92.45	93.9			Average-Depth (mbs)	TIC Dolo %	TIC Sid %	TOC %	TN %	TOC/TN	22,29,30-trisnor17(21)ene (µg/gSed)	bb-C27 hopane (µg/gSed)	30-norhop-17(21)-ene (µg/gSed)	Hop-17(21)-ene (µg/gSed)	ba-C29 hopane (µg/gSed)	ab-C30 hopane (µg/gSed)	Neohop-13(18)-ene (µg/gSed)	bb-C29 hopane (µg/gSed)	ab-C31S hopane (µg/gSed)	ab-C31R hopane (µg/gSed)	ba-C31 hopane (µg/gSed)	bb-C30 hopane (µg/gSed)	bb-C31 hopane (µg/gSed)	Archaeol (ng/gSed)	GDGT-0 (ng/gSed)	GDGT-1 (ng/gSed)	GDGT-2 (ng/gSed)	GDGT-3 (ng/gSed)	GDGT-4 (ng/gSed)	Crenarchaeol (ng/gSed)	Crenarchaeol regio-isomer (ng/gSed)	GDGT-III (ng/gSed)
TIC Dolo %	0.405175	2.90034	0.522201	0.17725	0.876573	0.540913	0.186015	0	0	0	0	0	0	0	0	0	0	0	0			65.15	0.405175	0	2.31629	0.0883292	26.2233	0.508678	3.35002	0.982848	5.70239	1.15612	0.325738	0.557306	1.82774	0	0.474778	0.170432	0.605919	2.06323	26.2147	202.515	24.0789	3.83334	0.660184	0.4334	0.884598	0.23115	50.3537
TIC Sid %	0	0	0	0	0	0	0	0.0273431	0.214061	0.210942	2.14217	4.33272	2.98851	3.10288	2.87013	3.14222	1.83675	3.20636	0.968164			68.41	2.90034	0	10.0015	0.322358	31.026	0.280363	4.0512	0	2.0326	0.774339	0.301368	0.16105	1.34787	1.03543	3.36238	1.41756	0.393116	2.1495	66.9164	558.596	82.4413	9.27775	3.49101	2.68065	3.40739	0.99592	219.308
TOC %	2.31629	10.0015	6.24169	4.63124	6.83268	3.51267	4.03333	2.27654	1.68741	1.42608	0.712393	0.698548	1.14096	1.08349	1.06095	0.94346	0.281037	0.070809	0.0983749			70.66	0.522201	0	6.24169	0.170618	36.5828	0.09275	0.762073	0.130532	8.34382	0.109023	0	0.378059	0.497125	0.374458	2.00572	0.756521	0.127678	0.678156	21.1115	286.003	28.1992	5.10135	2.56658	4.31666	10.3225	0.436062	81.5369
TN %	0.0883292	0.322358	0.170618	0.148035	0.182009	0.0985746	0.12976	0.036171	0.0309425	0.0278771	0.0139695	0.0121037	0.0250998	0.0233794	0.014156	0.0156249	0	0	0			71.91	0.17725	0	4.63124	0.148035	31.2847	0.132426	2.3731	0.490291	9.04567	0.431318	0.60031	0.212467	1.39202	0.652673	1.8499	0.564851	0.414389	2.12145	8.0107	279.559	45.6134	5.16149	1.67072	1.45236	1.89341	0.547285	92.5033
TOC/TN	26.2233	31.026	36.5828	31.2847	37.5403	35.6346	31.0831	62.9383	54.5337	51.1561	50.9963	57.7136	45.4569	46.344	74.9468	60.3818	0	0	0			76.23	0.876573	0	6.83268	0.182009	37.5403	0.536453	2.85171	1.01264	14.7511	0.426892	0.410227	0.491312	1.57083	0.59202	0.573363	0.211385	0.663235	2.69274	52.901	242.155	52.3898	4.44265	1.15295	0.628724	1.00279	0.181609	129.974
22,29,30-trisnor17(21)ene (µg/gSed)	0.508678	0.280363	0.09275	0.132426	0.536453	0.465684	0.178851	0.405488	0	0	0	0	0	0	0	0	0	0	0			77.19	0.540913	0	3.51267	0.0985746	35.6346	0.465684	5.43758	2.42645	39.523	1.15463	1.12688	2.5217	3.12487	1.18086	0.134538	0.390649	0.911561	3.27403	15.5732	90.6559	14.3458	4.22776	1.11677	0.951913	0.88136	0.168904	43.0213
bb-C27 hopane (µg/gSed)	3.35002	4.0512	0.762073	2.3731	2.85171	5.43758	1.03522	4.7448	1.94738	0.624003	0.158306	0.081172	0.0687509	0.0815195	0.0893484	0.0176443	0.0518946	0.00917479	0.044291			78.17	0.186015	0	4.03333	0.12976	31.0831	0.178851	1.03522	0.990435	8.32919	0.270293	0.129721	0.937787	0.606958	0.480752	0.0465983	0.0728251	0.191457	1.19912	26.4714	108.249	13.3386	3.92119	1.0091	0.994456	1.11786	0.204996	58.0804
30-norhop-17(21)-ene (µg/gSed)	0.982848	0	0.130532	0.490291	1.01264	2.42645	0.990435	0	0	0	0	0	0	0	0	0	0	0	0			79.15	0	0.0273431	2.27654	0.036171	62.9383	0.405488	4.7448	0	2.44824	1.18873	0.272944	0.267997	3.06459	3.82152	111.523	1.99564	0.336371	3.54187	8.4045	10.908	4.25698	2.54148	2.08625	1.48181	0.725983	0	0
Hop-17(21)-ene (µg/gSed)	5.70239	2.0326	8.34382	9.04567	14.7511	39.523	8.32919	2.44824	1.83268	0.538978	0.120773	0.0948442	0.132252	0.124501	0.119846	0.290921	0.02276	0	0.0673306			79.45	0	0.214061	1.68741	0.0309425	54.5337	0	1.94738	0	1.83268	0.625243	0.171825	0.464848	1.31855	0.838757	19.2308	0.438963	0.242277	1.0176	28.3248	54.3109	12.7481	10.3917	6.4807	3.21974	1.33819	0.226882	16.5357
ba-C29 hopane (µg/gSed)	1.15612	0.774339	0.109023	0.431318	0.426892	1.15463	0.270293	1.18873	0.625243	0.219264	0.0620698	0.0353496	0.0371076	0.0268722	0.0370997	0.0877357	0.0216402	0	0			80.15	0	0.210942	1.42608	0.0278771	51.1561	0	0.624003	0	0.538978	0.219264	0.0701284	0.127844	0.559186	0.144863	2.75307	0.125752	0.122521	0.431702	1.55783	20.7876	5.68727	5.72263	3.37259	1.24756	0.612367	0	16.4554
ab-C30 hopane (µg/gSed)	0.325738	0.301368	0	0.60031	0.410227	1.12688	0.129721	0.272944	0.171825	0.0701284	0.0150687	0.0085708	0.00854191	0.0132937	0.0152508	0.0256651	0.00890848	0	0			81.15	0	2.14217	0.712393	0.0139695	50.9963	0	0.158306	0	0.120773	0.0620698	0.0150687	0.0236237	0.135996	0.0396531	0.77108	0.0344939	0.0200565	0.122405	0.27447	0.604817	0.086495	0.0531347	0.0242019	0.0102936	0	0	0.0498179
Neohop-13(18)-ene (µg/gSed)	0.557306	0.16105	0.378059	0.212467	0.491312	2.5217	0.937787	0.267997	0.464848	0.127844	0.0236237	0.0133097	0.0263333	0.0260061	0.0200623	0.0405082	0.0416704	0	0			82.15	0	4.33272	0.698548	0.0121037	57.7136	0	0.081172	0	0.0948442	0.0353496	0.0085708	0.0133097	0.0674592	0.0207782	0.557563	0.0168102	0.0123617	0.077343	0.457947	2.80606	0.995291	0.740245	0.422183	0.235601	0.0619004	0	0.259767
bb-C29 hopane (µg/gSed)	1.82774	1.34787	0.497125	1.39202	1.57083	3.12487	0.606958	3.06459	1.31855	0.559186	0.135996	0.0674592	0.0692491	0.0759113	0.0991812	0.23541	0.0656297	0	0.0193122			84.19	0	2.98851	1.14096	0.0250998	45.4569	0	0.0687509	0	0.132252	0.0371076	0.00854191	0.0263333	0.0692491	0.0308082	1.37385	0.0403215	0.0195193	0.152198	0.905994	7.54624	2.3181	1.95587	1.73706	1.22133	0.214741	0.0255818	0.6647
ab-C31S hopane (µg/gSed)	0	1.03543	0.374458	0.652673	0.59202	1.18086	0.480752	3.82152	0.838757	0.144863	0.0396531	0.0207782	0.0308082	0.0344272	0.0481249	0.0673986	0	0	0			85.09	0	3.10288	1.08349	0.0233794	46.344	0	0.0815195	0	0.124501	0.0268722	0.0132937	0.0260061	0.0759113	0.0344272	1.4302	0.0412865	0.0319769	0.156308	0.54378	5.23296	1.65192	1.43037	1.3071	1.01636	0.196197	0.0177177	0.557679
ab-C31R hopane (µg/gSed)	0.474778	3.36238	2.00572	1.8499	0.573363	0.134538	0.0465983	111.523	19.2308	2.75307	0.77108	0.557563	1.37385	1.4302	1.51812	2.6751	0.555333	0.131482	0.124467			87.15	0	2.87013	1.06095	0.014156	74.9468	0	0.0893484	0	0.119846	0.0370997	0.0152508	0.0200623	0.0991812	0.0481249	1.51812	0.0497541	0.0436172	0.198906	0.524316	3.11721	0.9068	0.825414	0.981381	0.681028	0.0775731	0.00936263	0.257625
ba-C31 hopane (µg/gSed)	0.170432	1.41756	0.756521	0.564851	0.211385	0.390649	0.0728251	1.99564	0.438963	0.125752	0.0344939	0.0168102	0.0403215	0.0412865	0.0497541	0.0712743	0	0	0			89.15	0	3.14222	0.94346	0.0156249	60.3818	0	0.0176443	0	0.290921	0.0877357	0.0256651	0.0405082	0.23541	0.0673986	2.6751	0.0712743	0.0790454	0.361008	0.781474	8.26449	2.4992	2.43026	2.83174	1.92228	0.27539	0.0365181	0.886127
bb-C30 hopane (µg/gSed)	0.605919	0.393116	0.127678	0.414389	0.663235	0.911561	0.191457	0.336371	0.242277	0.122521	0.0200565	0.0123617	0.0195193	0.0319769	0.0436172	0.0790454	0	0	0			90.15	0	1.83675	0.281037	0	0	0	0.0518946	0	0.02276	0.0216402	0.00890848	0.0416704	0.0656297	0	0.555333	0	0	0.0879609	0.300002	0.0228153	0	0	0	0	0	0	0
bb-C31 hopane (µg/gSed)	2.06323	2.1495	0.678156	2.12145	2.69274	3.27403	1.19912	3.54187	1.0176	0.431702	0.122405	0.077343	0.152198	0.156308	0.198906	0.361008	0.0879609	0	0			92.45	0	3.20636	0.070809	0	0	0	0.00917479	0	0	0	0	0	0	0	0.131482	0	0	0	0.238667	0.00522686	0	0	0	0	0	0	0
Archaeol (ng/gSed)	26.2147	66.9164	21.1115	8.0107	52.901	15.5732	26.4714	8.4045	28.3248	1.55783	0.27447	0.457947	0.905994	0.54378	0.524316	0.781474	0.300002	0.238667	0.174298			93.9	0	0.968164	0.0983749	0	0	0	0.044291	0	0.0673306	0	0	0	0.0193122	0	0.124467	0	0	0	0.174298	0.00919969	0	0	0	0	0	0	0
GDGT-0 (ng/gSed)	202.515	558.596	286.003	279.559	242.155	90.6559	108.249	10.908	54.3109	20.7876	0.604817	2.80606	7.54624	5.23296	3.11721	8.26449	0.0228153	0.00522686	0.00919969
GDGT-1 (ng/gSed)	24.0789	82.4413	28.1992	45.6134	52.3898	14.3458	13.3386	4.25698	12.7481	5.68727	0.086495	0.995291	2.3181	1.65192	0.9068	2.4992	0	0	0
GDGT-2 (ng/gSed)	3.83334	9.27775	5.10135	5.16149	4.44265	4.22776	3.92119	2.54148	10.3917	5.72263	0.0531347	0.740245	1.95587	1.43037	0.825414	2.43026	0	0	0
GDGT-3 (ng/gSed)	0.660184	3.49101	2.56658	1.67072	1.15295	1.11677	1.0091	2.08625	6.4807	3.37259	0.0242019	0.422183	1.73706	1.3071	0.981381	2.83174	0	0	0
GDGT-4 (ng/gSed)	0.4334	2.68065	4.31666	1.45236	0.628724	0.951913	0.994456	1.48181	3.21974	1.24756	0.0102936	0.235601	1.22133	1.01636	0.681028	1.92228	0	0	0
Crenarchaeol (ng/gSed)	0.884598	3.40739	10.3225	1.89341	1.00279	0.88136	1.11786	0.725983	1.33819	0.612367	0	0.0619004	0.214741	0.196197	0.0775731	0.27539	0	0	0
Crenarchaeol regio-isomer (ng/gSed)	0.23115	0.99592	0.436062	0.547285	0.181609	0.168904	0.204996	0	0.226882	0	0	0	0.0255818	0.0177177	0.00936263	0.0365181	0	0	0
GDGT-III (ng/gSed)	50.3537	219.308	81.5369	92.5033	129.974	43.0213	58.0804	0	16.5357	16.4554	0.0498179	0.259767	0.6647	0.557679	0.257625	0.886127	0	0	0
GDGT-IIIa (ng/gSed)	0	0	0	0	0	0	0	0	0	0.603948	0	0	0	0	0	0	0	0	0
GDGT-IIIb (ng/gSed)	0	0	0	0	0	0	0	0	0	0.247154	0	0	0	0	0	0	0	0	0
GDGT-II (ng/gSed)	51.3695	251.695	87.7555	98.9927	141.8	47.8123	65.9071	14.6236	90.322	41.1433	0.0768078	0.804798	2.28636	2.05746	1.13081	5.02368	0	0	0
GDGT-Ila (ng/gSed)	0	0	0	0	0	0	0	0	12.6437	5.59534	0	0.095394	0.1801	0.18602	0.0898163	0.401279	0	0	0
GDGT-Ilb (ng/gSed)	0	0	0	0	0	0	0	0	11.1234	3.59256	0	0.0358324	0.0646178	0.0687431	0.0333751	0.158449	0	0	0
GDGT-I (ng/gSed)	76.074	462.212	178.902	168.642	253.401	108.646	154.187	44.2788	197.788	61.0594	0.126129	1.21189	4.39512	3.79458	2.43427	11.9229	0.0229436	0	0.014137
GDGT-Ia (ng/gSed)	1.19222	14.3159	6.5298	6.58924	4.55218	4.63069	5.95845	4.81905	36.5755	15.0096	0	0.160176	0.492429	0.507623	0.29402	1.44258	0	0	0
GDGT-Ib (ng/gSed)	0.457897	3.77248	2.00882	1.00048	1.05636	1.11094	1.41226	2.19243	17.58	6.21218	0	0.0525605	0.199736	0.207262	0.122471	0.493763	0	0	0
Compound A (µg/gSed)	8.80593	59.518	116.004	5.97504	80.6268	101.58	88.4636	130.267	475.195	33.8671	1.41176	0	1.04078	1.42785	1.63429	7.60724	0.522975	0	0
Compound B (µg/gSed)	1.64533	26.4206	15.7635	1.37838	50.1369	27.0946	47.912	15.6445	106.817	3.8368	0	0	0.223922	0.436488	0.14723	0	0	0	0
Comamonadaceae;g__ Other (%)	3.76591	17.394	17.4955	7.65699	15.3781	5.27017	8.38796	4.16383	7.36016	3.75495	3.53494	4.00001	6.03411	5.85246	3.79721	3.28103	4.56185	3.05183	5.29918
Comamonadaceae;g__Acidovorax (%)	5.88062	17.0806	21.3898	4.24207	20.6784	7.16345	8.77767	1.17305	4.00314	5.34325	1.88538	2.70863	2.52442	1.08237	3.64433	1.39816	4.30276	3.03933	3.8018
Comamonadaceae;g__Aquabacterium (%)	5.18618	14.7394	25.7062	5.46411	22.4514	9.46218	4.35879	0.95727	2.81213	3.53881	0.238844	1.12889	1.32656	0.75214	0.434402	0.712387	2.43831	0.797237	0.842764
Moraxellaceae;g__Acinetobacter (%)	3.14725	1.14641	1.49579	3.15106	0.262043	1.15126	6.15067	2.67969	4.1942	2.44751	3.08798	10.0311	1.90905	0.224593	2.67107	5.9926	14.5122	4.03935	2.98377
Pseudomonadaceae;g__Pseudomonas (%)	17.4659	4.74635	1.48059	1.32276	3.02836	2.00964	10.9468	2.27209	12.5357	1.74333	1.58889	1.27312	2.4976	1.32361	0.583008	11.174	3.51944	1.94941	6.16552
Corynebacteriaceae;g__ Corynebacterium (%)	1.22516	3.01266	0.547144	5.46072	1.07717	0.983717	1.00708	12.7071	8.19397	9.21646	11.9525	6.48237	2.26682	8.04583	4.4458	5.07651	6.57165	5.2152	0.84096
Rhodobacteraceae;g__ Paracoccus (%)	3.45359	1.62245	0.667397	1.06928	0.0497756	0.10486	3.59244	1.7204	5.75851	1.33093	0.421722	1.09779	5.13745	0.199623	4.07151	0.115187	1.00281	0.343652	1.1183
Comamonadaceae;g__Hydrogenophaga (%)	1.63768	5.75525	7.56284	3.59136	5.44698	0.526279	1.55029	0.219782	1.82656	2.30581	0.0508706	0.413942	0.519604	0.289327	0.158178	0.454852	0.759975	0.269428	0.319107
Sulfurimonadaceae;g__Sulfuricurvum (%)	2.10154	3.09951	5.71292	1.21509	4.68015	5.04837	2.41449	0.237283	1.66175	1.78704	0.0590769	0.822877	0.499518	0.427156	0.133764	0.362986	0.895475	0.707085	2.16332
Sulfurimonadaceae;g__Sulfuricurvum (%)	2.10154	3.09951	5.71292	1.21509	4.68015	5.04837	2.41449	0.237283	1.66175	1.78704	0.0590769	0.822877	0.499518	0.427156	0.133764	0.362986	0.895475	0.707085	2.16332
Sulfurimonadaceae;g__Sulfurimonas (%)	0.104095	0.0112543	0.137912	0.0792386	0.0498267	0.0335515	0.0196202	0.00307768	0.092182	0	0	0.0349177	0.025244	0.00843526	0	0.0204531	0	0.047244	0.0233131
Methanosaetaceae;g__Methanosaeta (%)	0	0	0	0	0	1.40604	3.38483	0	0	0	0	0.0392824	0	0	0	0	0	0.108124	0
Methanosarcinaceae;g__Methanosarcina (%)	0	0.0130582	0	0	0.228997	0.969366	2.58463	0.00237219	0	0	0	0.0589237	0	0.00396618	0	0.201553	0	0.0087668	0
Gallionellaceae;g__Gallionella (%)	0	0	0	0	0.0484025	4.14657	0.155882	0	0	0	0	0.0416895	0	0.0262087	0	0.0480769	0	0.0789012	0
[truncated: 24 more columns]

## Sheet: Corr-Ma linear Pearson Sta_p(un
	TIC Dolo %	TIC Sid %	TOC %	TN %	TOC/TN	22,29,30-trisnor17(21)ene (µg/gSed)	bb-C27 hopane (µg/gSed)	30-norhop-17(21)-ene (µg/gSed)	Hop-17(21)-ene (µg/gSed)	ba-C29 hopane (µg/gSed)	ab-C30 hopane (µg/gSed)	Neohop-13(18)-ene (µg/gSed)	bb-C29 hopane (µg/gSed)	ab-C31S hopane (µg/gSed)	ab-C31R hopane (µg/gSed)	ba-C31 hopane (µg/gSed)	bb-C30 hopane (µg/gSed)	bb-C31 hopane (µg/gSed)	Archaeol (ng/gSed)	GDGT-0 (ng/gSed)	GDGT-1 (ng/gSed)	GDGT-2 (ng/gSed)	GDGT-3 (ng/gSed)	GDGT-4 (ng/gSed)	Crenarchaeol (ng/gSed)	Crenarchaeol regio-isomer (ng/gSed)	GDGT-III (ng/gSed)	GDGT-IIIa (ng/gSed)	GDGT-IIIb (ng/gSed)	GDGT-II (ng/gSed)	GDGT-Ila (ng/gSed)	GDGT-Ilb (ng/gSed)	GDGT-I (ng/gSed)	GDGT-Ia (ng/gSed)	GDGT-Ib (ng/gSed)	Compound A (µg/gSed)	Compound B (µg/gSed)	Comamonadaceae;g__ Other (%)	Comamonadaceae;g__Acidovorax (%)	Comamonadaceae;g__Aquabacterium (%)	Moraxellaceae;g__Acinetobacter (%)	Pseudomonadaceae;g__Pseudomonas (%)	Corynebacteriaceae;g__ Corynebacterium (%)	Rhodobacteraceae;g__ Paracoccus (%)	Comamonadaceae;g__Hydrogenophaga (%)	Sulfurimonadaceae;g__Sulfuricurvum (%)	Sulfurimonadaceae;g__Sulfuricurvum (%)	Sulfurimonadaceae;g__Sulfurimonas (%)	Methanosaetaceae;g__Methanosaeta (%)
TIC Dolo %		0.091799	2.7657e-06	7.506e-07	0.60159	0.057563	0.024279	0.53944	0.42303	0.11998	0.20488	0.5573	0.21957	0.49843	0.66779	0.034802	0.069119	0.070747	5.0345e-06	5.6901e-07	7.9608e-07	0.012833	0.32739	0.13791	0.11827	3.6203e-06	5.8202e-08	0.66775	0.66775	4.7562e-07	0.53956	0.57197	1.4655e-06	0.36547	0.81088	0.87899	0.42202	0.00035837	0.0016188	0.0077804	0.2008	0.89883	0.15728	0.66894	0.0032661	0.034696	0.034662	0.86784	0.98142
TIC Sid %	-0.39765		0.0045008	0.0050346	0.48349	0.0041082	0.0010086	0.048405	0.044268	0.0022534	0.016236	0.039478	0.0014136	0.04672	0.33148	0.02605	0.0019476	0.00076067	0.0055895	0.0099422	0.010439	0.0020317	0.13377	0.090193	0.072389	0.020312	0.010324	0.47036	0.47036	0.0040954	0.37157	0.3731	0.0029531	0.037956	0.11853	0.063059	0.034237	0.031611	0.017213	0.016386	0.14687	0.25203	0.35459	0.73365	0.010873	0.0034444	0.0034207	0.14182	0.27109
TOC %	0.85712	-0.62153		3.79e-15	0.93856	0.012709	0.0095371	0.21096	0.11569	0.08789	0.072026	0.26374	0.068184	0.23929	0.91966	0.01538	0.01297	0.0076212	6.8973e-07	2.0588e-09	2.2823e-09	0.0018504	0.1965	0.015867	0.0053486	8.6851e-07	2.2782e-11	0.67268	0.67268	3.9924e-09	0.59975	0.63978	4.5019e-09	0.2448	0.6855	0.48327	0.14715	1.4645e-07	3.7529e-06	1.4656e-05	0.080864	0.95891	0.083944	0.67708	2.1925e-06	0.0011915	0.0011883	0.20437	0.54715
TN %	0.87853	-0.61541	0.98772		0.69535	0.014109	0.0107	0.18204	0.12952	0.08127	0.064896	0.26003	0.086622	0.35933	0.71451	0.027335	0.012932	0.010862	1.0519e-06	1.4599e-11	2.88e-10	0.0023341	0.27104	0.030316	0.0096262	4.6159e-08	2.4173e-13	0.6405	0.6405	2.9196e-09	0.49889	0.53601	6.8317e-09	0.30575	0.80804	0.65362	0.22117	2.1139e-06	2.5221e-05	0.00010753	0.10858	0.82293	0.051844	0.73171	1.0935e-05	0.0022347	0.0022295	0.19647	0.45205
TOC/TN	-0.12797	0.17118	-0.01897	-0.096161		0.87528	0.81486	0.59363	0.77061	0.67528	0.88694	0.86865	0.57811	0.27065	0.1829	0.41087	0.96577	0.69538	0.77089	0.53039	0.6371	0.46394	0.075649	0.21558	0.91429	0.6125	0.54677	0.56203	0.56203	0.77896	0.31828	0.35371	0.83521	0.4036	0.33428	0.35916	0.59384	0.67747	0.50665	0.64333	0.32338	0.66892	0.082877	0.28653	0.68989	0.31006	0.3089	0.51288	0.66874
22,29,30-trisnor17(21)ene (µg/gSed)	0.44289	-0.62643	0.55969	0.55275	-0.038615		1.5534e-06	0.00068023	0.0031612	1.1888e-05	0.00062642	0.0073616	6.7904e-06	0.024249	0.22064	0.05145	1.0988e-07	1.3602e-07	0.0042488	0.037059	0.019462	0.2068	0.83479	0.97744	0.67591	0.18389	0.022393	0.49554	0.49554	0.043352	0.32785	0.36804	0.046272	0.95753	0.70743	0.68237	0.31845	0.17222	0.050175	0.031722	0.13732	0.34286	0.19034	0.6675	0.18662	0.016338	0.016273	0.4234	0.41007
bb-C27 hopane (µg/gSed)	0.51427	-0.6928	0.57802	0.5708	0.057586	0.86705		0.0042351	0.002375	4.122e-10	1.2163e-05	0.0025259	1.2608e-11	0.00054637	0.054024	0.0010253	2.3802e-07	3.576e-11	0.007382	0.023081	0.013169	0.019998	0.32472	0.35833	0.56776	0.037721	0.020132	0.64563	0.64563	0.014237	0.99647	0.928	0.011502	0.24813	0.45118	0.16859	0.13351	0.22184	0.18843	0.1158	0.11936	0.55691	0.67666	0.93176	0.24945	0.044304	0.044045	0.55829	0.54363
30-norhop-17(21)-ene (µg/gSed)	0.15018	-0.45838	0.3007	0.31976	-0.13076	0.70882	0.62481		2.0835e-09	0.011542	3.1834e-06	5.4301e-09	0.0034538	0.59133	0.522	0.86183	6.912e-06	0.0037729	0.20305	0.40587	0.35159	0.48258	0.48642	0.64222	0.98981	0.61657	0.28418	0.62042	0.62042	0.41502	0.47862	0.51407	0.36724	0.81693	0.62073	0.77405	0.32938	0.69747	0.26291	0.16743	0.3704	0.50556	0.030593	0.60349	0.75017	0.0056308	0.0056087	0.4571	0.013375
Hop-17(21)-ene (µg/gSed)	0.19528	-0.46612	0.37305	0.36045	-0.071674	0.64005	0.65422	0.94076		0.018286	2.0214e-07	1.2034e-09	0.0017092	0.33325	0.7224	0.69748	1.5222e-05	0.0025412	0.22989	0.31986	0.27382	0.33425	0.82409	0.79572	0.50254	0.44041	0.22522	0.64508	0.64508	0.30676	0.59448	0.63482	0.25084	0.93499	0.82346	0.53175	0.28873	0.3859	0.14628	0.055896	0.23297	0.809	0.065087	0.32401	0.44162	0.00092753	0.00091866	0.3937	0.066677
ba-C29 hopane (µg/gSed)	0.36904	-0.65675	0.4021	0.40999	0.10283	0.8283	0.95125	0.56595	0.53491		0.00040708	0.0065428	5.2991e-10	0.0011327	0.02902	0.003296	9.322e-06	2.2212e-07	0.033028	0.10148	0.088889	0.027925	0.25757	0.4251	0.79722	0.13077	0.12992	0.76016	0.76016	0.080556	0.66622	0.60949	0.069454	0.19704	0.29039	0.11286	0.14689	0.65327	0.54152	0.39626	0.21566	0.14533	0.91516	0.59219	0.58516	0.17041	0.16995	0.44509	0.60368
ab-C30 hopane (µg/gSed)	0.30455	-0.54321	0.42184	0.43177	-0.034984	0.71204	0.8278	0.85458	0.89668	0.72825		9.5688e-06	1.6228e-05	0.098583	0.79433	0.23285	4.8196e-08	2.6442e-05	0.13628	0.1247	0.070063	0.12	0.82603	0.8713	0.94237	0.14333	0.093393	0.69153	0.69153	0.11091	0.79906	0.84722	0.104	0.58718	0.88122	0.49137	0.3173	0.56484	0.39893	0.20521	0.19797	0.9981	0.28994	0.49946	0.52434	0.027376	0.027143	0.53141	0.27489
Neohop-13(18)-ene (µg/gSed)	0.14369	-0.47581	0.26992	0.27195	-0.040685	0.59371	0.65123	0.9335	0.94455	0.60061	0.83296		0.0014927	0.2742	0.90394	0.70905	0.0001239	0.0056935	0.27063	0.56316	0.57749	0.24227	0.89824	0.7464	0.69644	0.59514	0.4503	0.73458	0.73458	0.45498	0.98058	0.93153	0.33707	0.59152	0.74763	0.24651	0.12964	0.7102	0.35891	0.22935	0.39619	0.60345	0.10861	0.83052	0.85986	0.0050611	0.0050433	0.53448	0.0083692
bb-C29 hopane (µg/gSed)	0.29536	-0.67824	0.42709	0.40358	0.13624	0.84005	0.96787	0.63552	0.66969	0.94976	0.82137	0.67582		9.8524e-05	0.014155	0.0020803	1.0755e-06	5.7349e-11	0.060083	0.15735	0.10414	0.046986	0.30932	0.40229	0.7034	0.21405	0.15004	0.77596	0.77596	0.10454	0.78618	0.73142	0.083999	0.2512	0.37585	0.10323	0.12228	0.52292	0.41583	0.22935	0.15822	0.55121	0.97845	0.97114	0.48318	0.083992	0.083557	0.51264	0.52662
ab-C31S hopane (µg/gSed)	0.16546	-0.46147	0.28363	0.22276	0.26619	0.51436	0.7173	0.13157	0.23479	0.68789	0.39023	0.2643	0.77467		3.5463e-08	5.4782e-07	0.085153	0.00020169	0.33094	0.57122	0.46388	0.2516	0.25086	0.27081	0.70957	0.53123	0.5427	0.69725	0.69725	0.38213	0.87005	0.81408	0.2889	0.33329	0.40427	0.11019	0.24892	0.64582	0.89501	0.71805	0.38765	0.71664	0.15069	0.96237	0.8282	0.78183	0.78041	0.67074	0.79189
ab-C31R hopane (µg/gSed)	-0.10534	-0.23563	-0.02482	-0.089852	0.31916	0.29471	0.44863	-0.15661	-0.087269	0.50064	0.064096	-0.029697	0.55253	0.9165		0.00012499	0.66531	0.029882	0.91036	0.57922	0.662	0.82668	0.38617	0.53095	0.89309	0.61624	0.53237	0.84045	0.84045	0.74946	0.7571	0.72388	0.8632	0.58109	0.48435	0.2046	0.60207	0.62257	0.40454	0.54084	0.74862	0.81856	0.019309	0.72281	0.53861	0.3628	0.36346	0.50353	0.67351
ba-C31 hopane (µg/gSed)	0.48619	-0.50895	0.54692	0.50527	0.20034	0.453	0.69211	-0.042817	0.095457	0.63792	0.28739	0.091642	0.66056	0.88318	0.76755		0.14809	0.0013684	0.063789	0.034196	0.041749	0.04992	0.096042	0.025791	0.097794	0.024736	0.056805	0.70446	0.70446	0.032493	0.98608	0.96157	0.02376	0.21425	0.37749	0.18565	0.40643	0.089499	0.26411	0.20634	0.23996	0.69858	0.33796	0.96814	0.11897	0.46748	0.46649	0.83261	0.65309
bb-C30 hopane (µg/gSed)	0.42579	-0.66366	0.55835	0.55854	-0.010561	0.90413	0.89459	0.83969	0.82282	0.83351	0.91331	0.76782	0.87299	0.40531	0.10617	0.34494		2.924e-07	0.0078122	0.029726	0.012736	0.038908	0.6227	0.64996	0.65314	0.087057	0.018979	0.70846	0.70846	0.022369	0.89256	0.94508	0.022767	0.44993	0.70988	0.32974	0.13752	0.21146	0.080801	0.035629	0.099403	0.39126	0.15079	0.71471	0.1718	0.0048708	0.0048342	0.24282	0.3844
bb-C31 hopane (µg/gSed)	0.42356	-0.70438	0.59166	0.56984	0.09615	0.90159	0.96362	0.63092	0.65093	0.89548	0.80988	0.60856	0.9615	0.75246	0.49835	0.67968	0.89188		0.010733	0.033376	0.013905	0.044811	0.45956	0.42702	0.57936	0.074732	0.022851	0.59524	0.59524	0.02204	0.75825	0.82048	0.01851	0.41476	0.68108	0.24397	0.14706	0.18727	0.14876	0.080079	0.12164	0.66229	0.67374	0.77864	0.19469	0.050408	0.050114	0.53813	0.42953
Archaeol (ng/gSed)	0.84596	-0.60959	0.8798	0.87334	-0.071583	0.62463	0.59355	0.30573	0.28915	0.49041	0.35463	0.2662	0.43895	0.23589	-0.027703	0.43339	0.59018	0.5706		7.443e-06	8.3595e-07	0.00051431	0.1107	0.076534	0.11005	0.00016293	2.0236e-07	0.53599	0.53599	8.895e-09	0.6914	0.60948	4.7218e-09	0.061174	0.20421	0.11834	0.00835	4.1608e-05	8.006e-05	0.00077582	0.16945	0.22172	0.092704	0.6953	0.00059661	0.0047795	0.004791	0.25144	0.53015
GDGT-0 (ng/gSed)	0.88263	-0.57543	0.94085	0.9673	-0.1535	0.48105	0.51805	0.20244	0.24119	0.38718	0.36473	0.14158	0.33771	0.13869	-0.13585	0.48761	0.49876	0.48957	0.83818		9.9044e-12	0.002368	0.25392	0.028472	0.0069821	1.0513e-10	6.171e-12	0.60817	0.60817	5.184e-09	0.59518	0.6432	5.8909e-08	0.27762	0.73342	0.72545	0.36485	1.2257e-05	0.00013146	0.00035697	0.1529	0.69172	0.072195	0.77821	6.1391e-06	0.0080753	0.0080586	0.090844	0.9932
GDGT-1 (ng/gSed)	0.87764	-0.57236	0.94011	0.9533	-0.11572	0.53047	0.55734	0.22628	0.2645	0.40095	0.4245	0.13646	0.38443	0.17882	-0.10728	0.47111	0.55955	0.55373	0.8769	0.96878		0.0016889	0.22058	0.074505	0.052901	5.0835e-08	2.6081e-14	0.67238	0.67238	5.0515e-11	0.74613	0.79448	5.3066e-09	0.21126	0.6154	0.63262	0.22166	2.614e-05	0.00025508	0.0006569	0.12585	0.80263	0.1213	0.72469	2.7458e-05	0.014293	0.014242	0.19738	0.89855
GDGT-2 (ng/gSed)	0.55905	-0.66167	0.66604	0.65506	0.17879	0.30333	0.52852	0.17153	0.23432	0.50362	0.36902	0.28192	0.46098	0.27663	0.053853	0.45567	0.47702	0.46508	0.71959	0.65436	0.67024		3.7232e-06	0.00031011	0.064137	0.00060819	0.0028055	0.419	0.419	3.3352e-05	0.0055552	0.005322	1.3126e-05	1.6303e-06	0.00015192	0.00090707	0.0005659	0.0099039	0.035619	0.040241	0.16213	0.17221	0.63513	0.17652	0.0044621	0.042854	0.042847	0.082621	0.77669
GDGT-3 (ng/gSed)	0.23757	-0.35677	0.30999	0.26599	0.41707	-0.051298	0.23885	-0.17005	-0.05467	0.2733	0.054058	0.031468	0.24634	0.27704	0.21088	0.39297	0.12066	0.18052	0.37787	0.27533	0.29474	0.85169		3.9875e-05	0.18581	0.097308	0.29683	0.27962	0.27962	0.04268	4.8524e-05	5.95e-05	0.0273	1.4365e-07	8.7647e-07	9.2204e-05	0.0019934	0.18279	0.48005	0.44075	0.31903	0.24746	0.49036	0.081835	0.13023	0.5549	0.55535	0.25917	0.60495
GDGT-4 (ng/gSed)	0.35326	-0.39946	0.54479	0.49722	0.29782	0.0069614	0.22321	-0.11397	0.063653	0.19443	0.039859	0.07947	0.20396	0.26611	0.1533	0.50971	0.11135	0.19364	0.41593	0.50212	0.41855	0.73794	0.79959		5.3888e-05	0.0090454	0.077578	0.95553	0.95553	0.020015	0.087074	0.078154	0.010355	0.0044349	0.013595	0.0079565	0.046055	0.0041029	0.03564	0.017802	0.1974	0.63079	0.68301	0.40981	0.0022515	0.069308	0.069497	0.019375	0.78648
Crenarchaeol (ng/gSed)	0.37063	-0.42135	0.61206	0.57745	-0.026485	0.10262	0.13993	0.0031448	0.16391	0.063179	0.01779	0.095798	0.093503	0.091471	-0.033069	0.39108	0.11027	0.1358	0.3785	0.59683	0.45052	0.43288	0.31716	0.79165		0.0099162	0.034692	0.8022	0.8022	0.040775	0.93356	0.96862	0.030435	0.3655	0.59236	0.33811	0.52487	0.00023877	0.00046643	9.3716e-05	0.28851	0.74809	0.16492	0.71217	2.0228e-05	0.0023189	0.0023266	0.0019647	0.91166
Crenarchaeol regio-isomer (ng/gSed)	0.85222	-0.5274	0.87632	0.91377	-0.12418	0.31847	0.47959	0.12277	0.18818	0.35936	0.34878	0.13023	0.29877	0.15319	-0.12289	0.51287	0.40307	0.41826	0.75932	0.95861	0.91275	0.71319	0.3916	0.58129	0.57559		7.0055e-08	0.53176	0.53176	7.0297e-08	0.95505	0.97119	1.4683e-07	0.10875	0.40356	0.45755	0.27268	0.00017857	0.0041973	0.0077811	0.23855	0.66761	0.16058	0.91898	0.00019362	0.039511	0.039454	0.12196	0.90704
GDGT-III (ng/gSed)	0.9113	-0.57306	0.96552	0.97992	-0.1475	0.52028	0.52804	0.25906	0.29193	0.3601	0.39587	0.18421	0.34339	0.14898	-0.15277	0.44409	0.53227	0.51879	0.89667	0.97049	0.98458	0.64605	0.25258	0.41459	0.48645	0.90926		0.72502	0.72502	2.5183e-11	0.603	0.63842	1.128e-09	0.27061	0.74048	0.72053	0.22415	4.7668e-06	3.7235e-05	0.00025268	0.14409	0.84055	0.06861	0.65662	1.6817e-05	0.0053826	0.0053674	0.27721	0.73449
GDGT-IIIa (ng/gSed)	-0.10535	-0.17628	-0.1037	-0.11456	0.14199	-0.16656	-0.11282	-0.12144	-0.113	-0.075028	-0.097425	-0.083301	-0.069959	-0.095531	-0.049519	-0.093154	-0.091839	-0.1302	-0.15144	-0.12568	-0.1038	0.19695	0.26144	0.013724	-0.061595	-0.153	-0.086415		6.9033e-84	0.92379	0.13054	0.28739	0.80879	0.27636	0.30259	0.82565	0.67043	0.5133	0.87893	0.8035	0.71236	0.55564	0.26242	0.82486	0.81271	0.99818	0.99952	0.37348	0.75509
GDGT-IIIb (ng/gSed)	-0.10535	-0.17628	-0.1037	-0.11456	0.14199	-0.16656	-0.11282	-0.12144	-0.113	-0.075028	-0.097425	-0.083301	-0.069959	-0.095531	-0.049519	-0.093154	-0.091839	-0.1302	-0.15144	-0.12568	-0.1038	0.19695	0.26144	0.013724	-0.061595	-0.153	-0.086415	1		0.92379	0.13054	0.28739	0.80879	0.27636	0.30259	0.82565	0.67043	0.5133	0.87893	0.8035	0.71236	0.55564	0.26242	0.82486	0.81271	0.99818	0.99952	0.37348	0.75509
GDGT-II (ng/gSed)	0.8852	-0.62659	0.93593	0.9383	-0.069	0.46791	0.55215	0.19861	0.2476	0.41087	0.37766	0.18234	0.38402	0.21263	-0.078479	0.49172	0.52036	0.52145	0.92941	0.93387	0.96208	0.80414	0.46924	0.52846	0.4731	0.90923	0.96511	-0.02354	-0.02354		0.60496	0.56556	2.8521e-17	0.027573	0.15924	0.18334	0.034861	9.5985e-06	0.00016746	0.00086352	0.1446	0.59552	0.17989	0.91516	2.8219e-05	0.0087697	0.0087523	0.2276	0.81598
GDGT-Ila (ng/gSed)	-0.15013	-0.21728	-0.12862	-0.16529	0.24196	-0.23736	0.0010903	-0.17306	-0.13046	0.10586	-0.062594	0.0059922	0.066694	0.04025	0.076015	-0.0042943	-0.033235	-0.075644	0.097469	-0.13022	-0.079555	0.60994	0.79445	0.40305	-0.020518	-0.013873	-0.12748	0.35956	0.35956	0.1268		8.2254e-18	0.50643	1.2231e-07	4.6523e-11	1.4376e-05	0.00078971	0.83796	0.65115	0.6383	0.9786	0.18554	0.20179	0.032952	0.93762	0.9003	0.8999	0.38728	0.65644
GDGT-Ilb (ng/gSed)	-0.13842	-0.2166	-0.1148	-0.15143	0.22531	-0.21885	0.022238	-0.15957	-0.1165	0.12522	-0.047394	0.021144	0.084328	0.057832	0.086787	0.011858	-0.016954	-0.055808	0.12523	-0.11364	-0.06405	0.61234	0.78896	0.41387	-0.0096823	0.008888	-0.11527	0.2574	0.2574	0.14072	0.99405		0.45614	8.0364e-08	7.5128e-12	1.9691e-06	0.00025745	0.90881	0.67427	0.6664	0.99094	0.15037	0.23749	0.024432	0.93708	0.92326	0.92273	0.3081	0.68171
GDGT-I (ng/gSed)	0.86801	-0.64349	0.93499	0.93163	-0.051167	0.46231	0.56618	0.2192	0.27705	0.42533	0.38458	0.233	0.40668	0.25662	-0.042388	0.51589	0.51906	0.53404	0.93461	0.91116	0.93368	0.82613	0.50537	0.57287	0.49691	0.90066	0.94498	-0.059508	-0.059508	0.99311	0.16244	0.18188		0.0155	0.10651	0.095228	0.013425	6.0199e-06	0.00016176	0.00085069	0.15752	0.54923	0.18042	0.81001	4.6001e-05	0.0061753	0.0061682	0.21589	0.61069
GDGT-Ia (ng/gSed)	0.21999	-0.47908	0.28047	0.24811	0.20341	-0.013106	0.27858	-0.056932	0.020076	0.30964	0.13303	0.1315	0.27685	0.23477	0.13518	0.29864	0.18435	0.19871	0.43729	0.26249	0.30051	0.86624	0.90093	0.62233	0.21998	0.37979	0.26622	0.26316	0.26316	0.5046	0.90286	0.90773	0.54639		5.4464e-13	5.5775e-07	1.8612e-05	0.22889	0.45089	0.5033	0.56666	0.20218	0.4891	0.056197	0.17328	0.39658	0.39667	0.22786	0.99705
GDGT-Ib (ng/gSed)	0.058846	-0.37038	0.099427	0.059743	0.23431	-0.092176	0.18385	-0.12134	-0.054868	0.25586	0.036763	0.07907	0.21539	0.20312	0.17085	0.21467	0.091372	0.1009	0.30498	0.083679	0.12318	0.76153	0.87618	0.55523	0.13121	0.20342	0.081386	0.24968	0.24968	0.33627	0.96245	0.96979	0.38203	0.97789		5.8174e-08	2.9727e-05	0.54176	0.8253	0.86051	0.73999	0.15991	0.31121	0.031177	0.4515	0.68276	0.68312	0.25747	0.81321
Compound A (µg/gSed)	0.03746	-0.43446	0.17126	0.11011	0.22283	0.10047	0.32931	0.070569	0.153	0.37577	0.16815	0.2795	0.38537	0.37836	0.30473	0.31727	0.23646	0.28094	0.37056	0.086274	0.11725	0.69722	0.77661	0.58909	0.23251	0.18132	0.087882	-0.054179	-0.054179	0.31886	0.82411	0.86306	0.39385	0.88292	0.9113		3.9864e-08	0.31793	0.52365	0.47286	0.67298	0.14896	0.60037	0.046416	0.40783	0.29759	0.29802	0.11071	0.70411
Compound B (µg/gSed)	0.1957	-0.48752	0.34569	0.29439	0.13069	0.24188	0.35699	0.23663	0.25671	0.3459	0.24243	0.36035	0.36692	0.27813	0.12781	0.20221	0.35359	0.34576	0.58618	0.22027	0.29409	0.71596	0.66257	0.46271	0.15554	0.26511	0.29258	-0.10445	-0.10445	0.48605	0.70287	0.74434	0.55607	0.81823	0.80701	0.9153		0.097925	0.16179	0.21183	0.61277	0.10087	0.76801	0.069823	0.22294	0.11299	0.1133	0.20572	0.20698
Comamonadaceae;g__ Other (%)	0.73284	-0.49391	0.90069	0.86184	-0.1021	0.32668	0.29398	0.09546	0.21099	0.11023	0.14097	0.091265	0.15627	0.11275	-0.1207	0.40025	0.30039	0.31616	0.79848	0.82763	0.81016	0.57567	0.31923	0.6265	0.74688	0.7564	0.84702	-0.15985	-0.15985	0.8329	-0.050303	-0.028186	0.84246	0.28974	0.14933	0.24213	0.39094		1.1203e-08	1.6773e-07	0.1335	0.75557	0.049334	0.73377	1.5379e-08	0.00045221	0.00045306	0.077388	0.88473
Comamonadaceae;g__Acidovorax (%)	0.67217	-0.53915	0.85155	0.81103	-0.16235	0.45522	0.31538	0.27037	0.34639	0.14942	0.20539	0.22294	0.19827	0.032473	-0.20301	0.26972	0.41056	0.34441	0.78067	0.76601	0.74465	0.4843	0.17251	0.48425	0.72325	0.62529	0.80134	-0.037478	-0.037478	0.75845	-0.11094	-0.10317	0.75955	0.18397	0.054287	0.156	0.33434	0.92741		9.2188e-12	0.19179	0.87509	0.01264	0.49206	4.1714e-08	3.7438e-06	3.7659e-06	0.059954	0.69571
Comamonadaceae;g__Aquabacterium (%)	0.59043	-0.54257	0.82367	0.77208	-0.1136	0.49363	0.37295	0.33016	0.44556	0.20653	0.30434	0.28946	0.28947	0.088693	-0.14967	0.30362	0.48428	0.41146	0.70358	0.73298	0.71019	0.47421	0.18804	0.5368	0.77613	0.59042	0.74497	-0.061183	-0.061183	0.69924	-0.11531	-0.10581	0.69985	0.16362	0.043229	0.1753	0.30015	0.89902	0.96905		0.12758	0.69473	0.022917	0.30416	3.233e-08	5.5684e-07	5.545e-07	0.018179	0.96101
Moraxellaceae;g__Acinetobacter (%)	-0.30718	0.34592	-0.41049	-0.37995	-0.2395	-0.35376	-0.36961	-0.2178	-0.28733	-0.29777	-0.30903	-0.20656	-0.33705	-0.21023	-0.078749	-0.28325	-0.38936	-0.36751	-0.32868	-0.34115	-0.36369	-0.33409	-0.24159	-0.3094	-0.25682	-0.28407	-0.34816	-0.090557	-0.090557	-0.34774	-0.0066016	0.002795	-0.33757	-0.14032	-0.081544	-0.1036	-0.12408	-0.357	-0.31312	-0.36216		0.58862	0.49981	0.97039	0.17925	0.15321	0.15315	0.43993	0.70881
Pseudomonadaceae;g__Pseudomonas (%)	0.031285	-0.27639	-0.012679	0.055035	-0.10496	0.2303	0.14383	0.16276	-0.059439	0.34716	0.00058737	0.12733	0.14589	-0.089153	-0.056415	-0.095092	0.20868	0.10719	0.29405	0.097361	0.06146	0.32669	0.27896	0.11788	-0.078922	0.1054	0.049487	-0.14429	-0.14429	0.1301	0.31735	0.34313	0.14661	0.30629	0.33576	0.34425	0.38782	-0.076507	-0.038677	-0.096365	0.13253		0.28054	0.063496	0.85291	0.89756	0.9001	0.18587	0.31557
Corynebacteriaceae;g__ Corynebacterium (%)	-0.33776	0.2249	-0.40675	-0.45232	0.40803	-0.31409	-0.10237	-0.4965	-0.4315	-0.026217	-0.25609	-0.37993	-0.0066481	0.34288	0.53104	0.23258	-0.3428	-0.10335	-0.39664	-0.42161	-0.36782	-0.11639	0.16854	-0.10025	-0.33201	-0.33525	-0.4265	0.27064	0.27064	-0.32125	0.30654	0.28468	-0.32087	0.16902	0.24541	0.1284	-0.072505	-0.45671	-0.56005	-0.51858	0.16494	-0.26096		0.75346	0.091319	0.0023958	0.0024259	0.074703	0.15944
Rhodobacteraceae;g__ Paracoccus (%)	-0.10495	-0.083602	-0.10223	-0.084236	0.25784	-0.10543	-0.021075	-0.12731	-0.23919	0.13127	-0.16507	-0.052643	-0.0089029	0.011612	0.087137	-0.0098303	-0.089786	-0.069101	0.096176	-0.06924	-0.086523	0.32362	0.4093	0.20078	-0.090619	0.025033	-0.1091	-0.054426	-0.054426	0.026216	0.49059	0.5138	0.05912	0.44507	0.49501	0.46204	0.42482	-0.083564	-0.16789	-0.2489	0.0091353	0.43382	-0.077187		0.58973	0.37304	0.37134	0.54334	0.5523
Comamonadaceae;g__Hydrogenophaga (%)	0.63839	-0.56978	0.86121	0.83011	-0.097969	0.3166	0.27783	0.078249	0.18769	0.13375	0.15574	0.043434	0.1713	0.053375	-0.15048	0.36997	0.32698	0.31119	0.71393	0.84207	0.80896	0.622	0.35983	0.65679	0.81628	0.75379	0.82056	0.058265	0.058265	0.80829	0.019261	0.019428	0.79586	0.32592	0.18373	0.20162	0.29331	0.92456	0.91483	0.91743	-0.32169	-0.045609	-0.39819	-0.13213		0.00042995	0.00042899	0.011543	0.73566
Sulfurimonadaceae;g__Sulfuricurvum (%)	0.48644	-0.63566	0.68572	0.65715	-0.24598	0.54278	0.46605	0.60918	0.6963	0.32799	0.50515	0.61513	0.40669	0.068083	-0.22119	0.17741	0.61723	0.45481	0.61827	0.58819	0.55188	0.4689	0.14455	0.42553	0.65538	0.47574	0.61171	-0.000561	-0.000561	0.58319	-0.030829	-0.023706	0.60394	0.20639	0.10034	0.2522	0.37564	0.7244	0.85159	0.88294	-0.34091	0.031679	-0.6538	-0.21663	0.72625		2.2821e-48	0.026035	0.28969
Sulfurimonadaceae;g__Sulfuricurvum (%)	0.48652	-0.63601	0.68583	0.65726	-0.24655	0.54305	0.46655	0.6094	0.69669	0.32832	0.50581	0.61532	0.40721	0.068534	-0.22089	0.17779	0.61765	0.45533	0.61814	0.58832	0.55212	0.46891	0.14439	0.42527	0.65521	0.47586	0.61186	-0.00014768	-0.00014768	0.58331	-0.030951	-0.02387	0.604	0.20635	0.10022	0.25197	0.37534	0.72433	0.85148	0.883	-0.34095	0.030891	-0.65319	-0.21738	0.72634	1		0.026115	0.29036
Sulfurimonadaceae;g__Sulfurimonas (%)	0.04094	-0.35001	0.30488	0.31001	-0.16001	0.19513	0.14333	0.1815	0.20762	0.18629	0.15312	0.152	0.1601	-0.10435	-0.16353	0.051984	0.2816	0.15066	0.27672	0.39872	0.30941	0.40834	0.27242	0.53079	0.66325	0.36721	0.26271	-0.21643	-0.21643	0.29051	0.21039	0.24694	0.29762	0.29036	0.27336	0.37786	0.30401	0.41484	0.43915	0.53532	-0.18837	0.31712	-0.41829	0.14875	0.56595	0.509	0.50876		0.67869
Methanosaetaceae;g__Methanosaeta (%)	-0.0057306	-0.26596	0.14736	0.18351	-0.10502	0.20068	0.14865	0.55632	0.42922	0.12725	0.26394	0.58604	0.15489	0.064873	-0.10342	-0.11029	0.21164	0.19261	0.15359	0.0020982	-0.031372	0.069725	-0.1268	-0.066599	-0.027303	0.028734	0.08333	-0.076661	-0.076661	0.05723	-0.10916	-0.10068	0.12481	-0.0009103	-0.058107	0.09327	0.30321	0.03567	0.096042	0.012031	0.091723	0.24327	-0.33612	0.14549	-0.082949	0.25622	0.25587	-0.10169
Methanosarcinaceae;g__Methanosarcina (%)	0.0059038	-0.26263	0.17535	0.20563	-0.074157	0.22115	0.13638	0.54955	0.41629	0.10869	0.24662	0.55954	0.1439	0.055222	-0.11098	-0.12264	0.2193	0.20045	0.19075	0.016943	-0.0021434	0.077788	-0.11298	-0.058588	-0.032449	0.027206	0.1108	-0.084026	-0.084026	0.082103	-0.11723	-0.10922	0.14738	-0.0068447	-0.066067	0.089169	0.32312	0.069461	0.13302	0.046421	0.094922	0.27247	-0.35265	0.12507	-0.050925	0.26592	0.26551	-0.10522	0.99252
Gallionellaceae;g__Gallionella (%)	0.083338	-0.20527	0.084969	0.085672	-0.040264	0.40502	0.52658	0.81941	0.89699	0.44735	0.79555	0.9101	0.54671	0.18156	-0.081748	0.011959	0.62417	0.44584	0.028071	-0.017569	-0.014203	0.071986	-0.085452	-0.056557	-0.040157	0.0011577	0.023872	-0.061324	-0.061324	-0.00025034	-0.086826	-0.080314	0.035603	-0.028228	-0.059781	0.09154	0.1096	-0.081222	0.035125	0.12822	-0.17325	-0.12151	-0.26457	-0.22412	-0.13998	0.4591	0.4595	-0.038793	0.37236
[truncated: 2 more columns]

## Sheet: Corr Lipids-Genus
Table S1: Genus-lipid correlation plot for abundant lipids (top) and rarely detected lipids (bottom).
green = positive correlation, red = negative correlation
Pearson correlation coefficients r for p-values <0.05	TIC Dolomite %	TIC Siderite %	TOC %	TN %	TOC/TN	Comamonadaceae, other	Comamonadaceae, Acidovorax	Comamonadaceae, Aquabacterium	Moraxellaceae, Acinetobacter	Pseudomonadaceae, Pseudomonas	Corynebacteriaceae, Corynebacterium	Rhodobacteraceae, Paracoccus	Comamonadaceae, Hydrogenophaga	Sulfurimonadaceae, Sulfuricurvum	Sulfurimonadaceae, Sulfurimonas	Methanosaetaceae, Methanosaeta	Methanosarcinaceae, Methanosarcina	Gallionellaceae, Gallionella
TIC Dolomite %			0.85712	0.87853		0.73284	0.67217	0.59043					0.63839	0.48644
TIC Siderite %			-0.62153	-0.61541		-0.49391	-0.53915	-0.54257					-0.56978	-0.63566
TOC %	0.85712	-0.62153		0.98772		0.90069	0.85155	0.82367					0.86121	0.68572
TN %	0.87853	-0.61541	0.98772			0.86184	0.81103	0.77208					0.83011	0.65715
TOC/TN
bb-C27 hopane (µg/gSed)	0.51427	-0.6928	0.57802	0.5708										0.46605				0.52658
Hop-17(21)-ene (µg/gSed)		-0.46612												0.6963				0.89699
ab-C31R hopane (µg/gSed)											0.53104
bb-C31 hopane (µg/gSed)		-0.70438	0.59166	0.56984
Archaeol (ng/gSed)	0.84596	-0.60959	0.8798	0.87334		0.79848	0.78067	0.70358					0.71393	0.61827
GDGT-0 (ng/gSed)	0.88263	-0.57543	0.94085	0.9673		0.82763	0.76601	0.73298					0.84207	0.58819
GDGT-1 (ng/gSed)	0.87764	-0.57236	0.94011	0.9533		0.81016	0.74465	0.71019					0.80896	0.55188
GDGT-III (ng/gSed)	0.9113	-0.57306	0.96552	0.97992		0.84702	0.80134	0.74497					0.82056	0.61171
GDGT-II (ng/gSed)	0.8852	-0.62659	0.93593	0.9383		0.8329	0.75845	0.69924					0.80829	0.58319
GDGT-I (ng/gSed)	0.86801	-0.64349	0.93499	0.93163		0.84246	0.75955	0.69985					0.79586	0.60394
Compound A (µg/gSed)												0.46204
Compound B (µg/gSed)		-0.48752
rarely detected lipids
Pearson correlation coefficients r for p-values <0.05	TIC Dolomite %	TIC Siderite %	TOC %	TN %	TOC/TN	Comamonadaceae, other	Comamonadaceae, Acidovorax	Comamonadaceae, Aquabacterium	Moraxellaceae, Acinetobacter	Pseudomonadaceae, Pseudomonas	Corynebacteriaceae, Corynebacterium	Rhodobacteraceae, Paracoccus	Comamonadaceae, Hydrogenophaga	Sulfurimonadaceae, Sulfuricurvum	Sulfurimonadaceae, Sulfurimonas	Methanosaetaceae, Methanosaeta	Methanosarcinaceae, Methanosarcina	Gallionellaceae, Gallionella
22,29,30-trisnor17(21)ene (µg/gSed)		-0.62643	0.55969	0.55275				0.49363						0.54278
30-norhop-17(21)-ene (µg/gSed)		-0.45838									-0.4965			0.60918		0.55632	0.54955	0.81941
ba-C29 hopane (µg/gSed)		-0.65675
ab-C30 hopane (µg/gSed)		-0.54321												0.50515				0.79555
Neohop-13(18)-ene (µg/gSed)		-0.47581												0.61513		0.58604	0.55954	0.9101
bb-C29 hopane (µg/gSed)		-0.67824																0.54671
ab-C31S hopane (µg/gSed)		-0.46147
ba-C31 hopane (µg/gSed)	0.48619	-0.50895	0.54692	0.50527
bb-C30 hopane (µg/gSed)		-0.66366	0.55835	0.55854				0.48428						0.61723				0.62417
GDGT-2 (ng/gSed)	0.55905	-0.66167	0.66604	0.65506		0.57567	0.4843	0.47421					0.622	0.4689
GDGT-3 (ng/gSed)
GDGT-4 (ng/gSed)			0.54479	0.49722		0.6265	0.48425	0.5368					0.65679		0.53079
Crenarchaeol (ng/gSed)			0.61206	0.57745		0.74688	0.72325	0.77613					0.81628	0.65538	0.66325
Crenarchaeol regio-isomer (ng/gSed)	0.85222	-0.5274	0.87632	0.91377		0.7564	0.62529	0.59042					0.75379	0.47574
GDGT-IIIa (ng/gSed)
GDGT-IIIb (ng/gSed)
GDGT-Ila (ng/gSed)												0.49059
GDGT-Ilb (ng/gSed)												0.5138
GDGT-Ia (ng/gSed)		-0.47908
GDGT-Ib (ng/gSed)												0.49501

## Sheet: DATA PCA selected
Average-Depth (mbs)	65.15	68.41	70.66	71.91	76.23	77.19	78.17	79.15	79.45	80.15	81.15	82.15	84.19	85.09	87.15	89.15	90.15	92.45	93.9				Average-Depth (mbs)	65.15	68.41	70.66	71.91	76.23	77.19	78.17	79.15	79.45	80.15	81.15	82.15	84.19	85.09	87.15	89.15	90.15	92.45	93.9
TIC Dolo %	0.405175	2.90034	0.522201	0.17725	0.876573	0.540913	0.186015	0	0	0	0	0	0	0	0	0	0	0	0				TIC Dolo %	0.129764	0.917841	0.164578	0.0569694	0.278517	0.170908	0.0601344	0	0	0	0	0	0	0	0	0	0	0	0
TIC Sid %	0	0	0	0	0	0	0	0.0273431	0.214061	0.210942	2.14217	4.33272	2.98851	3.10288	2.87013	3.14222	1.83675	3.20636	0.968164		transformation by "Row normalized length"		TIC Sid %	0	0	0	0	0	0	0	0.00347117	0.0242982	0.0242982	0.24761	0.501006	0.34596	0.358688	0.332075	0.363316	0.212899	0.371415	0.112235
TOC %	2.31629	10.0015	6.24169	4.63124	6.83268	3.51267	4.03333	2.27654	1.68741	1.42608	0.712393	0.698548	1.14096	1.08349	1.06095	0.94346	0.281037	0.070809	0.0983749				TOC %	0.144823	0.624236	0.389523	0.289021	0.426353	0.219107	0.251567	0.142326	0.105496	0.0892658	0.0443208	0.0436965	0.0711629	0.0674175	0.066169	0.0586782	0.0174786	0.00436965	0.00624236
TN %	0.0883292	0.322358	0.170618	0.148035	0.182009	0.0985746	0.12976	0.036171	0.0309425	0.0278771	0.0139695	0.0121037	0.0250998	0.0233794	0.014156	0.0156249	0	0	0				TN %	0.189066	0.672233	0.357124	0.315109	0.378131	0.210073	0.273095	0.0840292	0.0630219	0.0630219	0.0210073	0.0210073	0.0630219	0.0420146	0.0210073	0.0420146	0	0	0
TOC/TN	26.2233	31.026	36.5828	31.2847	37.5403	35.6346	31.0831	62.9383	54.5337	51.1561	50.9963	57.7136	45.4569	46.344	74.9468	60.3818	0	0	0				TOC/TN	0.137105	0.162257	0.191278	0.163564	0.196298	0.186311	0.162519	0.329116	0.28514	0.267518	0.266681	0.301768	0.237712	0.242314	0.391917	0.315729	0	0	0
bb-C27 hopane (µg/gSed)	3.35002	4.0512	0.762073	2.3731	2.85171	5.43758	1.03522	4.7448	1.94738	0.624003	0.158306	0.081172	0.0687509	0.0815195	0.0893484	0.0176443	0.0518946	0.00917479	0.044291				bb-C27 hopane (µg/gSed)	0.336132	0.406368	0.0762568	0.237801	0.285963	0.545838	0.104351	0.475601	0.195659	0.0622095	0.0160541	0.00802703	0.00702365	0.00802703	0.00903041	0.00200676	0.00501689	0.00100338	0.00401351
Hop-17(21)-ene (µg/gSed)	5.70239	2.0326	8.34382	9.04567	14.7511	39.523	8.32919	2.44824	1.83268	0.538978	0.120773	0.0948442	0.132252	0.124501	0.119846	0.290921	0.02276	0	0.0673306				Hop-17(21)-ene (µg/gSed)	0.125995	0.0448719	0.18435	0.200045	0.326039	0.873565	0.184129	0.0541557	0.040451	0.0119364	0.00265252	0.00198939	0.00287357	0.00265252	0.00265252	0.00641027	0.000442087	0	0.00154731
ab-C31R hopane (µg/gSed)	0.474778	3.36238	2.00572	1.8499	0.573363	0.134538	0.0465983	111.523	19.2308	2.75307	0.77108	0.557563	1.37385	1.4302	1.51812	2.6751	0.555333	0.131482	0.124467				ab-C31R hopane (µg/gSed)	0.00414648	0.0296429	0.0177328	0.0163212	0.00502871	0.0011469	0.000441115	0.983862	0.169653	0.0242613	0.00679316	0.00494048	0.0120865	0.0126159	0.0134099	0.0236437	0.00494048	0.0011469	0.00105867
bb-C31 hopane (µg/gSed)	2.06323	2.1495	0.678156	2.12145	2.69274	3.27403	1.19912	3.54187	1.0176	0.431702	0.122405	0.077343	0.152198	0.156308	0.198906	0.361008	0.0879609	0	0				bb-C31 hopane (µg/gSed)	0.299859	0.31296	0.0989827	0.308593	0.391564	0.47599	0.174675	0.515292	0.148474	0.062592	0.0174675	0.011645	0.0218344	0.02329	0.0291125	0.0524026	0.0131006	0	0
Archaeol (ng/gSed)	26.2147	66.9164	21.1115	8.0107	52.901	15.5732	26.4714	8.4045	28.3248	1.55783	0.27447	0.457947	0.905994	0.54378	0.524316	0.781474	0.300002	0.238667	0.174298				Archaeol (ng/gSed)	0.25833	0.659574	0.208063	0.0789478	0.521391	0.15346	0.260892	0.0827917	0.279126	0.0153756	0.00266116	0.00453383	0.0089691	0.00532232	0.0051252	0.0076878	0.00295685	0.00236548	0.00167555
GDGT-0 (ng/gSed)	202.515	558.596	286.003	279.559	242.155	90.6559	108.249	10.908	54.3109	20.7876	0.604817	2.80606	7.54624	5.23296	3.11721	8.26449	0.0228153	0.00522686	0.00919969				GDGT-0 (ng/gSed)	0.262495	0.724025	0.370697	0.36235	0.313861	0.117508	0.140307	0.0141409	0.0703935	0.0269468	0.000777685	0.00364216	0.00978587	0.00677882	0.00404396	0.0107061	2.59228e-05	1.29614e-05	1.29614e-05
GDGT-1 (ng/gSed)	24.0789	82.4413	28.1992	45.6134	52.3898	14.3458	13.3386	4.25698	12.7481	5.68727	0.086495	0.995291	2.3181	1.65192	0.9068	2.4992	0	0	0				GDGT-1 (ng/gSed)	0.206412	0.706668	0.241728	0.390965	0.449082	0.123007	0.114349	0.0365163	0.109292	0.0487742	0.000771472	0.00857191	0.0198868	0.0141437	0.00780044	0.0214298	0	0	0
GDGT-III (ng/gSed)	50.3537	219.308	81.5369	92.5033	129.974	43.0213	58.0804	0	16.5357	16.4554	0.0498179	0.259767	0.6647	0.557679	0.257625	0.886127	0	0	0				GDGT-III (ng/gSed)	0.16925	0.737205	0.274095	0.310936	0.436891	0.144611	0.195234	0	0.0555988	0.0553299	0.000168074	0.000873983	0.00221857	0.00188243	0.000873983	0.00299171	0	0	0
GDGT-II (ng/gSed)	51.3695	251.695	87.7555	98.9927	141.8	47.8123	65.9071	14.6236	90.322	41.1433	0.0768078	0.804798	2.28636	2.05746	1.13081	5.02368	0	0	0				GDGT-II (ng/gSed)	0.148089	0.725597	0.252993	0.285367	0.408779	0.137826	0.190004	0.0421463	0.260373	0.118598	0.000230623	0.00230623	0.00660158	0.00593854	0.00325755	0.0144716	0	0	0
GDGT-I (ng/gSed)	76.074	462.212	178.902	168.642	253.401	108.646	154.187	44.2788	197.788	61.0594	0.126129	1.21189	4.39512	3.79458	2.43427	11.9229	0.0229436	0	0.014137				GDGT-I (ng/gSed)	0.116734	0.709287	0.274532	0.258787	0.388856	0.166729	0.236613	0.0679501	0.30352	0.0937	0.000199492	0.00185681	0.00675205	0.00581597	0.00372897	0.0182919	3.06911e-05	0	1.53456e-05
Compound A (µg/gSed)	8.80593	59.518	116.004	5.97504	80.6268	101.58	88.4636	130.267	475.195	33.8671	1.41176	0	1.04078	1.42785	1.63429	7.60724	0.522975	0	0				Compound A (µg/gSed)	0.0164808	0.111344	0.217001	0.0111868	0.150834	0.190025	0.165482	0.243695	0.888954	0.0633604	0.00263768	0	0.00194552	0.00267509	0.00304923	0.014236	0.000972761	0	0
Compound B (µg/gSed)	1.64533	26.4206	15.7635	1.37838	50.1369	27.0946	47.912	15.6445	106.817	3.8368	0	0	0.223922	0.436488	0.14723	0	0	0	0				Compound B (µg/gSed)	0.0122426	0.19603	0.116935	0.0102393	0.372026	0.201001	0.35548	0.116045	0.792578	0.0284918	0	0	0.00163235	0.00326469	0.00111296	0	0	0	0
Comamonadaceae;g__ Other (%)	3.76591	17.394	17.4955	7.65699	15.3781	5.27017	8.38796	4.16383	7.36016	3.75495	3.53494	4.00001	6.03411	5.85246	3.79721	3.28103	4.56185	3.05183	5.29918				Comamonadaceae;g__ Other (%)	0.105091	0.485381	0.4882	0.213669	0.429125	0.14706	0.234068	0.116197	0.205382	0.104784	0.0986445	0.11162	0.168379	0.163301	0.105956	0.0915566	0.127303	0.0851664	0.147869
Comamonadaceae;g__Acidovorax (%)	5.88062	17.0806	21.3898	4.24207	20.6784	7.16345	8.77767	1.17305	4.00314	5.34325	1.88538	2.70863	2.52442	1.08237	3.64433	1.39816	4.30276	3.03933	3.8018				Comamonadaceae;g__Acidovorax (%)	0.152888	0.444054	0.556075	0.110279	0.537565	0.186216	0.228201	0.0304944	0.104066	0.138902	0.0490043	0.0704258	0.0656163	0.0281287	0.0947329	0.0363438	0.111865	0.0790048	0.0988405
Comamonadaceae;g__Aquabacterium (%)	5.18618	14.7394	25.7062	5.46411	22.4514	9.46218	4.35879	0.95727	2.81213	3.53881	0.238844	1.12889	1.32656	0.75214	0.434402	0.712387	2.43831	0.797237	0.842764				Comamonadaceae;g__Aquabacterium (%)	0.130453	0.370758	0.646632	0.137446	0.564753	0.238016	0.10965	0.0240732	0.0707356	0.0890232	0.00601202	0.0283999	0.0333806	0.0189165	0.0109172	0.0179103	0.0613277	0.0200485	0.0212056
Moraxellaceae;g__Acinetobacter (%)	3.14725	1.14641	1.49579	3.15106	0.262043	1.15126	6.15067	2.67969	4.1942	2.44751	3.08798	10.0311	1.90905	0.224593	2.67107	5.9926	14.5122	4.03935	2.98377				Moraxellaceae;g__Acinetobacter (%)	0.142737	0.0519786	0.0678533	0.142918	0.0118834	0.0522053	0.278988	0.121555	0.190225	0.111033	0.140061	0.454971	0.0865856	0.0102052	0.121147	0.271822	0.658214	0.183195	0.135344
Pseudomonadaceae;g__Pseudomonas (%)	17.4659	4.74635	1.48059	1.32276	3.02836	2.00964	10.9468	2.27209	12.5357	1.74333	1.58889	1.27312	2.4976	1.32361	0.583008	11.174	3.51944	1.94941	6.16552				Pseudomonadaceae;g__Pseudomonas (%)	0.609395	0.16559	0.0516726	0.04616	0.105648	0.0701296	0.381945	0.0792709	0.437386	0.0608139	0.0554408	0.0444154	0.0871561	0.0461949	0.0203411	0.389865	0.122779	0.0680013	0.215134
Corynebacteriaceae;g__ Corynebacterium (%)	1.22516	3.01266	0.547144	5.46072	1.07717	0.983717	1.00708	12.7071	8.19397	9.21646	11.9525	6.48237	2.26682	8.04583	4.4458	5.07651	6.57165	5.2152	0.84096				Corynebacteriaceae;g__ Corynebacterium (%)	0.0453776	0.11161	0.0202625	0.202291	0.0398952	0.0364502	0.0373022	0.470704	0.30353	0.341388	0.442737	0.240112	0.0839763	0.298047	0.164693	0.188067	0.243446	0.193179	0.0311531
Rhodobacteraceae;g__ Paracoccus (%)	3.45359	1.62245	0.667397	1.06928	0.0497756	0.10486	3.59244	1.7204	5.75851	1.33093	0.421722	1.09779	5.13745	0.199623	4.07151	0.115187	1.00281	0.343652	1.1183				Rhodobacteraceae;g__ Paracoccus (%)	0.323864	0.152087	0.0625411	0.100235	0.00468824	0.00984531	0.336803	0.161275	0.539992	0.124801	0.0395688	0.102954	0.48167	0.018753	0.38181	0.010783	0.0940461	0.0322551	0.104829
Comamonadaceae;g__Hydrogenophaga (%)	1.63768	5.75525	7.56284	3.59136	5.44698	0.526279	1.55029	0.219782	1.82656	2.30581	0.0508706	0.413942	0.519604	0.289327	0.158178	0.454852	0.759975	0.269428	0.319107				Comamonadaceae;g__Hydrogenophaga (%)	0.134433	0.472322	0.620707	0.294719	0.447044	0.0431696	0.127211	0.0180557	0.149945	0.189257	0.00418565	0.0339776	0.0426772	0.0237187	0.0129673	0.0373425	0.0623744	0.0220772	0.0261808
Sulfurimonadaceae;g__Sulfuricurvum (%)	2.10154	3.09951	5.71292	1.21509	4.68015	5.04837	2.41449	0.237283	1.66175	1.78704	0.0590769	0.822877	0.499518	0.427156	0.133764	0.362986	0.895475	0.707085	2.16332				Sulfurimonadaceae;g__Sulfuricurvum (%)	0.196346	0.289569	0.533648	0.113492	0.437156	0.47153	0.22549	0.022138	0.155246	0.166922	0.00551115	0.0768759	0.0467047	0.0398858	0.0125169	0.0339076	0.0836014	0.0660404	0.202044
Sulfurimonadaceae;g__Sulfurimonas (%)	0.104095	0.0112543	0.137912	0.0792386	0.0498267	0.0335515	0.0196202	0.00307768	0.092182	0	0	0.0349177	0.025244	0.00843526	0	0.0204531	0	0.047244	0.0233131				Sulfurimonadaceae;g__Sulfurimonas (%)	0.433555	0.0433555	0.606977	0.346844	0.216777	0.130066	0.086711	0	0.390199	0	0	0.130066	0.130066	0.0433555	0	0.086711	0	0.216777	0.086711
Methanosaetaceae;g__Methanosaeta (%)	0	0	0	0	0	1.40604	3.38483	0	0	0	0	0.0392824	0	0	0	0	0	0.108124	0				Methanosaetaceae;g__Methanosaeta (%)	0	0	0	0	0	0.384807	0.922444	0	0	0	0	0.0109165	0	0	0	0	0	0.0300204	0
Methanosarcinaceae;g__Methanosarcina (%)	0	0.0130582	0	0	0.228997	0.969366	2.58463	0.00237219	0	0	0	0.0589237	0	0.00396618	0	0.201553	0	0.0087668	0				Methanosarcinaceae;g__Methanosarcina (%)	0	0.00360515	0	0	0.0829186	0.3497	0.93013	0	0	0	0	0.0216309	0	0	0	0.0721031	0	0.00360515	0
Gallionellaceae;g__Gallionella (%)	0	0	0	0	0.0484025	4.14657	0.155882	0	0	0	0	0.0416895	0	0.0262087	0	0.0480769	0	0.0789012	0				Gallionellaceae;g__Gallionella (%)	0	0	0	0	0.0120344	0.998855	0.0385101	0	0	0	0	0.00962752	0	0.00722064	0	0.0120344	0	0.019255	0

## Sheet: Results PCA selected
Explained Variance
PC	Eigenvalue	% variance	Cum Var %
1	6.63783	34.936	34.936
2	2.94147	15.481	50.417
3	1.88368	9.9141	60.3311
4	1.50972	7.9459	68.277
5	1.09757	5.7767	74.0537
6	0.989188	5.2063	79.26
7	0.882189	4.6431	83.9031
8	0.814532	4.287	88.1901
9	0.571373	3.0072	91.1973
10	0.491793	2.5884	93.7857
11	0.465404	2.4495	96.2352
12	0.257647	1.356	97.5912
13	0.207504	1.0921	98.6833
14	0.124499	0.65526	99.3386
15	0.0496665	0.2614	99.6
16	0.0467607	0.24611	99.8461
17	0.0180866	0.095193	99.9413
18	0.00827361	0.043545	99.9848
19	0.0028105	0.014792	99.9996
PC Scores
	PC 1	PC 2	PC 3	PC 4	PC 5	PC 6	PC 7	PC 8	PC 9	PC 10	PC 11	PC 12	PC 13	PC 14	PC 15	PC 16	PC 17	PC 18	PC 19
TIC Dolo %	-1.9637	-0.026316	-0.16461	-0.7743	-0.15968	0.27948	-0.99886	-1.2517	0.046882	-0.91294	-1.3542	-0.63521	-0.45186	-0.31058	0.25676	0.23419	-0.016697	0.011383	0.056468
TIC Sid %	7.6876	-0.47818	0.5279	-2.1361	-0.50344	1.3113	-0.0013048	-2.3771	0.77612	-0.41216	-0.023839	0.20241	0.37742	0.10701	-0.29112	0.028344	0.10393	-0.020194	-0.051433
TOC %	-0.95178	1.3159	-0.60665	-0.45845	-0.48301	0.2727	-0.34367	0.24301	-0.050791	-0.068047	0.21178	0.32262	0.15054	0.24278	0.27611	0.01096	0.17457	0.093805	0.012599
TN %	-1.5139	1.208	-0.25126	-0.48286	-0.31469	0.52712	-0.73947	0.15847	0.010007	0.10218	0.28056	0.054018	0.0035834	0.22589	0.28634	0.0071499	0.19441	-0.021459	0.098719
TOC/TN	4.4334	0.72768	-2.589	0.53376	-1.4312	1.1252	0.33118	1.551	0.49008	-0.056587	-0.35607	1.2475	-0.77668	0.083379	0.062699	0.3201	-0.17645	-0.017074	0.019563
bb-C27 hopane (µg/gSed)	-1.4779	-0.37689	-0.93109	0.76554	1.7606	1.114	0.036338	0.60075	-0.21252	0.10277	-0.20519	-0.034522	0.61581	-0.31514	0.080967	0.39256	0.13163	-0.076336	-0.060149
Hop-17(21)-ene (µg/gSed)	-1.8956	-1.4075	-0.013952	-1.3426	0.81063	1.1123	1.4321	0.67899	-0.12361	0.75259	-0.22516	0.36868	0.22246	0.051993	0.00099295	-0.36737	-0.12642	0.035688	0.033799
ab-C31R hopane (µg/gSed)	-0.15544	-2.605	-2.4791	1.5391	1.773	-0.37791	-0.38691	-1.3629	-1.0496	-1.8267	1.1572	0.1603	-0.36203	0.24784	-0.10213	-0.073069	-0.089438	0.011121	0.038263
bb-C31 hopane (µg/gSed)	-1.2693	-0.041904	-1.0413	0.59348	1.5876	1.0868	-0.17583	0.82677	-0.19936	0.077648	0.30216	0.59941	0.84784	-0.039893	-0.18243	-0.014816	0.13314	0.049531	-0.050077
Archaeol (ng/gSed)	-1.9295	0.29479	0.26251	0.47107	-0.34947	-0.1296	-0.53446	-0.51589	0.55062	-0.48776	-0.79058	0.35187	0.61461	-0.8669	0.059394	0.033085	-0.039176	-0.15854	0.0057512
GDGT-0 (ng/gSed)	-2.046	1.5341	0.054821	-0.27662	0.24115	0.65268	-1.0636	-0.3914	0.017625	0.41768	0.20732	-0.25993	-0.44305	0.12125	0.33785	0.0028879	-0.26703	-0.012329	-0.13586
GDGT-1 (ng/gSed)	-1.9635	1.6241	-0.35672	-0.28213	0.16917	0.51948	-1.0346	-0.31667	0.072507	0.50064	-0.092677	-0.037554	0.11655	0.36241	-0.32381	-0.28663	-0.24786	-0.047916	-0.00079176
GDGT-III (ng/gSed)	-2.1439	1.2532	-0.20071	-0.60997	-0.1856	0.19203	-0.96572	-0.21111	0.010539	0.15713	-0.16381	-0.16584	0.011217	0.11273	-0.21906	-0.10127	-0.17724	0.018861	0.020239
GDGT-II (ng/gSed)	-1.788	1.1889	-0.5668	0.1079	-0.35793	-0.36359	-0.62548	-0.017668	0.1655	0.41663	-0.3768	-0.3109	-0.062347	0.22819	-0.4169	0.14615	0.12914	0.013033	0.0098224
GDGT-I (ng/gSed)	-1.7997	0.83696	-0.49342	0.14202	-0.46991	-0.46717	-0.52285	-0.15189	0.20696	0.3801	-0.29996	-0.16118	0.039706	0.33529	-0.15036	0.21646	0.1667	0.13976	0.043968
Compound A (µg/gSed)	-0.77902	-1.7729	-0.72598	2.1799	-0.38917	-1.6716	1.1914	-1.1607	0.62868	0.81612	-0.26924	0.098469	-0.31254	0.28688	0.22269	0.1354	0.043895	0.03207	-0.076139
Compound B (µg/gSed)	-1.2948	-1.7122	-0.19884	1.5457	-1.0448	-1.5901	0.69377	-0.8912	0.85385	0.66323	-0.5093	0.46457	0.68119	0.064181	-0.11952	-0.13622	-0.098508	-0.027649	0.03444
Comamonadaceae;g__ Other (%)	1.3434	1.7956	0.54955	-0.39049	-0.63288	-0.3663	0.7021	0.0018412	-0.15065	-0.81435	0.28207	-0.17815	0.82928	0.8286	0.53542	-0.19631	0.017198	-0.035366	-0.01879
Comamonadaceae;g__Acidovorax (%)	-0.106	1.5908	0.76282	-0.60446	-0.58317	-0.89251	0.91676	0.2581	-0.52788	-0.89206	-0.034182	0.10172	0.16253	-0.57619	-0.13052	0.036237	-0.098198	0.34263	-0.048578
Comamonadaceae;g__Aquabacterium (%)	-1.4889	1.4249	0.19361	-0.86789	-0.30702	-0.66994	1.0994	-0.25197	-0.31745	-0.56921	0.19989	0.68569	-0.40552	-0.65842	0.15215	-0.38353	0.093411	-0.088719	0.0094232
Moraxellaceae;g__Acinetobacter (%)	4.7455	-0.49488	2.005	-0.89446	1.7852	-2.1232	-1.448	0.1624	-1.8131	1.1018	-0.71943	0.69848	-0.08015	0.040957	0.11299	0.098675	-0.023207	-0.015868	0.01774
Pseudomonadaceae;g__Pseudomonas (%)	2.0292	-0.23994	3.3647	2.4559	1.4669	0.36424	-0.79036	1.2935	1.7695	-0.98035	-0.62034	-0.076334	-0.50997	0.14462	-0.02879	-0.29354	0.069158	0.043296	-0.012059
Corynebacteriaceae;g__ Corynebacterium (%)	5.5558	0.56202	-3.3357	-0.36535	0.76858	-1.3779	-0.11219	1.1252	0.82955	0.50503	0.30507	-1.3854	0.21827	-0.47485	0.088848	-0.22601	-0.028873	0.00014528	0.027753
Rhodobacteraceae;g__ Paracoccus (%)	2.7874	-0.38661	0.87758	3.1697	-2.1782	1.798	0.12957	0.0099906	-2.1408	0.42822	-0.25338	-0.72701	0.091469	-0.20941	-0.04129	-0.18765	0.027297	-0.01042	0.01274
Comamonadaceae;g__Hydrogenophaga (%)	-1.0289	2.31	-0.24528	-0.3143	-0.42672	-0.98514	0.37724	0.23213	-0.39758	0.10835	0.60171	0.0025365	-0.90522	-0.0095629	-0.3386	-0.15632	0.25871	-0.1392	-0.076902
Sulfurimonadaceae;g__Sulfuricurvum (%)	-0.12767	1.133	1.6632	-0.42824	0.27562	-0.80532	2.0577	1.1099	-0.38389	-1.0172	-0.11044	-0.58473	0.22564	0.36669	-0.25341	0.45005	-0.1663	-0.14369	0.031563
Sulfurimonadaceae;g__Sulfurimonas (%)	0.42967	1.6404	2.1578	0.74946	1.0989	0.86941	0.94813	-1.2306	0.68399	1.2358	1.916	-0.097497	-0.28748	-0.35928	0.091593	0.25767	-0.066916	0.02943	0.082278
Methanosaetaceae;g__Methanosaeta (%)	-1.0659	-3.8848	0.98833	-1.1321	-1.4034	-0.25035	-0.89024	0.88685	0.087193	0.017127	1.1246	-0.38826	0.070006	-0.1709	0.058858	0.17911	-0.025169	-0.019221	-0.084756
Methanosarcinaceae;g__Methanosarcina (%)	-1.004	-3.6752	1.0229	-1.0821	-1.4493	-0.3183	-1.0508	1.0651	0.33951	-0.19401	0.93629	0.20797	-0.0085723	-0.0095058	-0.064392	-0.031811	0.016717	-0.01123	0.06066
Gallionellaceae;g__Gallionella (%)	-1.2186	-3.3381	-0.23031	-1.8109	0.93215	1.164	1.7687	-0.073291	-0.17197	0.44828	-1.12	-0.52369	-0.6727	0.14993	0.038685	-0.094478	0.08757	0.024456	-0.0002548
PC loadings
	PC 1	PC 2	PC 3	PC 4	PC 5	PC 6	PC 7	PC 8	PC 9	PC 10	PC 11	PC 12	PC 13	PC 14	PC 15	PC 16	PC 17	PC 18	PC 19
65.15	-0.017504	0.24928	0.33509	0.38966	0.3216	0.38603	-0.13473	0.25522	0.14773	0.022682	-0.026128	-0.024327	-0.015971	-0.49051	0.10451	0.087912	-0.017207	-0.18942	-0.13566
68.41	-0.20117	0.37305	-0.088402	-0.06202	-0.127	0.021979	-0.39244	-0.11956	0.025732	-0.17107	-0.44087	-0.22628	0.12968	0.12743	0.24549	0.40202	0.24168	0.17576	0.063659
70.66	-0.11433	0.43583	0.13815	-0.087992	-0.11423	-0.18351	0.39563	-0.050278	-0.079484	-0.092439	0.38204	0.19032	-0.32075	-0.071771	0.46939	0.13465	0.079057	0.11961	-0.017021
71.91	-0.10186	0.43007	-0.11231	-0.05282	0.18441	0.20591	-0.21464	0.14835	-0.078338	0.52688	0.33705	-0.015496	0.11458	0.44346	-0.081444	-0.098394	-0.12248	0.077844	-0.0063336
76.23	-0.22202	0.39542	-0.012355	-0.086246	-0.10755	-0.12349	0.15927	0.04974	0.092205	-0.17151	-0.14481	0.44514	0.52406	-0.19303	-0.30511	-0.24169	-0.044575	-0.01509	0.097162
77.19	-0.14783	-0.24537	-0.0015969	-0.28968	0.21052	0.30311	0.518	0.35714	-0.017988	0.21301	-0.27218	0.041415	0.20079	0.08415	0.18005	0.19758	0.20703	0.12978	0.043661
78.17	-0.055199	-0.28012	0.28783	-0.015679	-0.43855	-0.14949	-0.32103	0.47252	0.066948	0.016858	0.36095	0.083279	0.30253	-0.0090008	0.12453	0.17525	0.10517	0.059156	0.0028388
79.15	0.064721	-0.12127	-0.45597	0.34108	0.40967	-0.015151	-0.044703	0.035977	-0.23733	-0.37991	0.30825	0.18781	0.26918	0.051514	0.10956	0.18148	0.13601	0.11404	0.05491
79.45	0.04889	-0.028878	-0.0043989	0.64896	-0.11843	-0.3136	0.24249	-0.1681	0.2668	0.43594	-0.16594	0.058216	0.17622	0.14545	0.11922	0.11204	0.045289	0.053054	-0.013498
80.15	0.18742	0.25655	-0.29854	0.077816	-0.10538	-0.2849	0.15762	0.53546	-0.093599	0.020066	-0.054609	-0.26965	-0.23604	-0.10211	-0.39782	0.15396	0.23897	-0.097909	-0.019309
81.15	0.32966	0.065097	-0.27505	-0.10934	0.0081927	-0.078478	-0.039423	0.19371	0.23308	0.058479	-0.04408	-0.19768	0.102	-0.25772	0.3943	-0.22004	-0.37499	0.19961	0.44072
82.15	0.35672	0.045464	0.044518	-0.19075	0.038253	-0.040754	-0.061265	-0.10617	-0.11479	0.16888	-0.052325	0.36008	0.019633	-0.0073566	-0.057809	0.57997	-0.23464	-0.4219	0.25859
84.19	0.27988	0.086196	0.089528	0.19034	-0.34692	0.4083	0.095354	-0.11545	-0.3301	0.0049929	0.036174	-0.0567	0.09321	0.047124	0.04864	-0.24984	0.40567	-0.15843	0.42619
85.09	0.31724	0.10226	-0.21985	-0.17259	-0.10333	0.1234	0.09251	-0.03085	0.40442	-0.14485	0.10014	-0.078399	0.22924	0.1763	0.22206	-0.075077	0.14036	-0.43592	-0.47576
87.15	0.31271	0.051754	-0.11648	0.097804	-0.35416	0.30867	0.039111	0.042369	-0.27401	0.00025041	-0.14763	0.19795	-0.00045655	-0.072203	-0.035419	0.1012	-0.31643	0.44047	-0.45328
89.15	0.32285	0.026885	0.13114	-0.0042487	0.14812	0.048608	-0.17067	0.15405	0.40999	-0.12286	-0.12673	0.46483	-0.3347	0.27042	-0.082727	-0.11321	0.28812	0.28771	0.12148
90.15	0.2612	0.034323	0.19135	-0.1302	0.26236	-0.40963	-0.18566	0.05328	-0.44924	0.19039	-0.23938	0.087341	0.13312	-0.07627	0.26531	-0.29711	0.21791	-0.036362	-0.26285
92.45	0.30644	0.055526	0.18703	-0.2118	0.15655	-0.028901	0.075754	-0.3394	0.15449	0.12206	0.2834	-0.25542	0.26032	-0.27815	-0.28922	0.19972	0.26149	0.39327	-0.029525
93.9	0.20209	0.12468	0.48146	0.11356	0.13767	-0.095785	0.22143	0.14081	-0.081263	-0.39375	-0.055104	-0.29558	0.17795	0.44876	-0.06104	0.037756	-0.32793	0.033723	0.054907

## Sheet: OTU_SILVA138
#OTU ID	Kingdom	Phylum	Class	Order	Family	Genus	Species	Sum core	Sum water	5pm	8pm	65.15	65.65	66.65	68.41	69.06	70.11	70.66	70.96	71.91	76.23	76.53	77.19	78.17	78.45	79.15	79.55	80.15	81.15	82.15	84.19	85.09	87.15	89.15	90.15	92.45	93.9
ASV_3	d__Bacteria	p__Proteobacteria	c__Gammaproteobacteria	o__Burkholderiales	f__Comamonadaceae	g__Acidovorax		1.80889	1.15471	0.0797662	0.0866597	0.0588958	0.0813126	0.227	0.168258	0.0546685	0.0699997	0.210002	0.0864366	0.0420867	0.196276	0.0410468	0.0708348	0.0877316	0.0742802	0.01159	0.0380286	0.0525134	0.0188326	0.0270255	0.0253322	0.0107814	0.0355926	0.0136925	0.0429644	0.0304513	0.0332593
ASV_6	d__Bacteria	p__Proteobacteria	c__Gammaproteobacteria	o__Burkholderiales	f__Comamonadaceae	g__Aquabacterium		1.57617	1.00528	0.0178887	0.0183241	0.0519408	0.116353	0.202199	0.146008	0.0374581	0.0672535	0.248657	0.0627098	0.0541909	0.216969	0.0219064	0.0830876	0.0435276	0.0652458	0.0094534	0.027919	0.0347799	0.00237065	0.0112746	0.0133118	0.00749391	0.00427937	0.00704976	0.0243466	0.00796793	0.0084169
ASV_7	d__Bacteria	p__Campilobacterota	c__Campylobacteria	o__Campylobacterales	f__Sulfurimonadaceae	g__Sulfuricurvum		0.491892	0.969068	0.0147703	0.0148647	0.020827	0.00932181	0.0635135	0.028083	0.0146401	0.0376369	0.0535753	0.032855	0.0120381	0.040342	0.00421094	0.0340247	0.0212586	0.0268748	0.00234587	0.0155048	0.0177064	0.000584051	0.00510007	0.00501302	0.00405895	0.00131589	0.00340647	0.00894106	0.00707538	0.0216384
ASV_9	d__Bacteria	p__Proteobacteria	c__Gammaproteobacteria	o__Burkholderiales	f__Comamonadaceae			0.394972	1.00293	0.0582738	0.0793255	0.0139094	0.0104814	0.0544307	0.0462572	0.0106974	0.021216	0.0642697	0.0156389	0.0110415	0.0469424	0.00629499	0.0227779	0.014907	0.00937789	0.00216245	0.0080998	0.00265466	0.000249439	0.00382019	0.00379892	0.0024542	0.00138234	0.00267561	0.0118652	0.00430327	0.00326343
ASV_11	d__Bacteria	p__Proteobacteria	c__Gammaproteobacteria	o__Burkholderiales	f__Comamonadaceae			0.203497	0.865327	0.153893	0.163542	0.00689936	0.00315563	0.0351109	0.0314153	0.00518847	0.00991595	0.0250451	0.0123379	0.0100873	0.0234577	0.00200039	0.00201632	0.00524497	0.010762	0.001802	0.00608461	0.00154191	0	0.0020971	0.00160321	0.00157863	0.000306501	0.00144279	0.000580965	0.00207901	0.00174266
ASV_12	d__Bacteria	p__Proteobacteria	c__Gammaproteobacteria	o__Burkholderiales	f__Comamonadaceae	g__Hydrogenophaga	s__uncultured_bacterium	0.351601	0.599261	0.0014028	0.00196798	0.0120223	0.00427908	0.0339034	0.0416408	0.010594	0.0317843	0.0558589	0.019472	0.0333044	0.0398291	0.00344116	0.00418493	0.0120217	0.0105274	0.00157347	0.00686857	0.00387405	0	0.00296656	0.004116	0.00244956	0.00151516	0.00243585	0.00730759	0.00244421	0.00318701
ASV_14	d__Bacteria	p__Proteobacteria	c__Gammaproteobacteria	o__Burkholderiales	f__Comamonadaceae	Ambiguous_taxa	Ambiguous_taxa	0.314131	0.59589	0.0111514	0.00867869	0.0099803	0.00809767	0.0318105	0.0339245	0.00801737	0.0138716	0.0405275	0.0139936	0.00890478	0.0501078	0.00522483	0.0112852	0.010352	0.0172976	0.002028	0.00721053	0.0102847	0.00048106	0.00278861	0.00451972	0.00151527	0.00225228	0.00239227	0.0142075	0.00155951	0.00149631
ASV_15	d__Bacteria	p__Proteobacteria	c__Gammaproteobacteria	o__Burkholderiales	f__Comamonadaceae	g__Rhodoferax		0.33558	0.576293	0.0103407	0.0115769	0.0125699	0.0267268	0.0488438	0.0221086	0.00586415	0.014121	0.034273	0.0128847	0.0345034	0.0258771	0.00467177	0.0221323	0.00849529	0.0147716	0.00192542	0.00566661	0.0155564	0.000746404	0.00457325	0.00329925	0.00252525	0.000818431	0.0026096	0.00562591	0.00299147	0.00139847
ASV_16	d__Bacteria	p__Proteobacteria	c__Gammaproteobacteria	o__Pseudomonadales	f__Pseudomonadaceae	g__Pseudomonas		0.506903	0.715577	0.00320919	0.0111196	0.0209081	0.0559219	0.00161179	0.0388728	0.00436237	0.00253098	0.00125786	0.0249525	0.005137	0.0129433	0.138569	0.00763811	0.0948077	0.00383086	0.0209081	0.00339968	0.00347884	0.0114678	0.0026087	0.0218123	0.00042058	0.00177016	0.000733255	0.00306968	0.00460542	0.0192842
ASV_19	d__Bacteria	p__Proteobacteria	c__Gammaproteobacteria	o__Pseudomonadales	f__Moraxellaceae	g__Enhydrobacter	s__uncultured_bacterium	0.384995	0.701728	0.000186131	0.00170417	0.0117083	0.00688696	0.000950593	0.00192011	0.0040995	0.00213701	0.000370412	0.0442041	0.0806683	0.00143298	0.0525357	0.00117073	0.00313041	0.00776579	0.0205511	0.0373337	0.0127421	0.00551704	0.0442754	0.00540743	0.00115058	0.00167773	0.00671714	0.00319842	0.0117605	0.015683
ASV_20	d__Bacteria	p__Proteobacteria	c__Gammaproteobacteria	o__Burkholderiales	f__Oxalobacteraceae			0.151491	0.70038	0.0819879	0.0959391	0.00632726	0.0263712	0.0114836	0.0116212	0.00382217	0.00544208	0.0130488	0.00637952	0.00450838	0.0287471	0.0031475	0.00165071	0.00547953	0.00791085	0.000775213	0.00247218	0.00172522	0.000304889	0.000765186	0.00278918	0.000406561	0.000985415	0.000880163	0.00255723	0.000915051	0.000975159
ASV_21	d__Bacteria	p__Proteobacteria	c__Alphaproteobacteria	o__Rhizobiales	f__Xanthobacteraceae	g__Afipia		0.477376	0.522453	0	0	0.0381389	0.0429809	0.00540657	0.0741595	0.0310996	0.0145434	0.000667219	0.0525782	0.00643971	0.00408388	0.0472545	0.0268245	0.00525343	0.00696508	0.0293456	0.00178115	0.0162241	0.00763273	0.00693676	0.00644618	0.0010215	0.0378875	0.000965476	0.00876221	0.00110517	0.00287161
ASV_22	d__Bacteria	p__Proteobacteria	c__Gammaproteobacteria	o__Pseudomonadales	f__Moraxellaceae	g__Acinetobacter		0.285549	0.522568	0	0.000229316	0.012677	0.00355712	0.00185985	0.000279154	0.00173342	0.000976709	0.0131398	0.00369631	0.0142902	0.000124704	0.00136614	0.00052208	0.0103588	0.00111878	0.00264891	0.0167935	0.0104489	0.00979162	0.0367424	0.00778074	0.000959277	0.00356596	0.00912982	0.10625	0.00199862	0.0137391
ASV_23	d__Bacteria	p__Proteobacteria	c__Alphaproteobacteria	o__Rhodobacterales	f__Rhodobacteraceae	g__Paracoccus		0.51655	0.569934	0	0	0.000721327	0.000596918	0.00194901	0.0148344	0.0314039	0.388018	0.00625506	0.000568043	0	0.000199527	0	0.000691036	0.00146691	0.00365664	0.000190342	0.000680617	0	0.000285073	0.00228538	0.0465868	0.00189114	0.0056489	0.000687845	0.000545755	0.00279829	0.00458966
ASV_24	d__Bacteria	p__Actinobacteriota	c__Actinobacteria	o__Corynebacteriales	f__Corynebacteriaceae	g__Corynebacterium	s__uncultured_bacterium	0.259749	0.569934	5.14443e-05	0.000263668	0.0021102	0.00297672	0.000368189	0.00195144	0.0685523	0.0156919	0.00271053	0.00776268	0.00402881	0.00334437	0.0210577	0.00105556	0.00282876	0.00268289	0.0172065	0.00303887	0.015699	0.0280096	0.0273346	0.0028622	0.000779564	0.0189726	0	0.00382029	0.00165899	0.00324442
ASV_25	d__Bacteria	p__Proteobacteria	c__Alphaproteobacteria	o__Rhodobacterales	f__Rhodobacteraceae			0.178502	0.569618	0.00306028	0.00279909	0.00893926	0.0266368	0.0217394	0.0137091	0.00281516	0.0142307	0.0132795	0.00464393	0.00255674	0.037486	0.00303532	0.00650166	0.00624916	0.002029	0.000362372	0.00150234	0.00205754	0.000106902	0.00112715	0.0024377	0.00113866	0.000543143	0.000759732	0.00256834	0.00124812	0.000798032
ASV_27	d__Bacteria	p__Proteobacteria	c__Gammaproteobacteria	o__Pseudomonadales	f__Pseudomonadaceae	g__Pseudomonas		0.213639	0.565627	0.00112605	0	0.00570462	0.00288902	0.00288452	0.000648357	0	0.00126221	0.00141363	0.000405745	0	0	0	0.000626618	0.00175014	0.000649097	0.000779618	0.07474	7.07547e-05	0	0.00128883	0	0.000440966	0.00291003	0.0972219	0.0154159	0.0020837	0.000453211
ASV_28	d__Bacteria	p__Proteobacteria	c__Gammaproteobacteria	o__Burkholderiales	f__Comamonadaceae			0	0.564685	0.141661	0.0786235	0	0	0	0	0	0	0	0	0	0	0	0	0	0	0	0	0	0	0	0	0	0	0	0	0	0
ASV_29	d__Bacteria	p__Actinobacteriota	c__Actinobacteria	o__Micrococcales	f__Micrococcaceae	g__Micrococcus		0.235731	0.345555	0.000186072	0.000137589	0.0629477	0.0139631	0.00125083	0.00213118	0.00057166	0.00104089	0	0.00182135	0.00497497	0.000206943	0.00145138	0.000357231	0.000559324	0.00399898	0.00108175	0.00208008	0.0110044	0.00885053	0.0173761	0.00413991	0.000346473	0.0309669	0.000628088	0.00169468	0.0158399	0.0464467
ASV_30	d__Bacteria	p__Proteobacteria	c__Gammaproteobacteria	o__Burkholderiales	f__Methylophilaceae	g__Methylotenera		0.136522	0.346181	0.00759315	0.00940246	0.00530327	0.0104229	0.0154571	0.00776233	0.00246069	0.00707836	0.0139109	0.00780424	0.00406559	0.011457	0.00172837	0.00847654	0.00634896	0.0045067	0	0.00346092	0.00291732	0	0.0012584	0.00168251	0.000925277	0.000836049	0.00110907	0.0138095	0.00156856	0.00217141
ASV_31	d__Bacteria	p__Actinobacteriota	c__Actinobacteria	o__Corynebacteriales	f__Corynebacteriaceae	g__Corynebacterium	s__uncultured_bacterium	0.227551	0.329186	0	0	0.00236918	0.00100312	0.000539133	0.00269659	0.00134665	0.000510894	0.000319457	0.0761402	0.0293229	0.000278003	0.000791426	0	0.000523239	0.0054973	0.0302736	0.00442821	0.00819935	0.00909301	0.0105791	0.00346401	0	0.00407426	0.00146266	0.011974	0.0192026	0.00346198
ASV_32	d__Bacteria	p__Bacteroidota	c__Bacteroidia	o__Flavobacteriales	f__Flavobacteriaceae	g__Flavobacterium		0.0733412	0.329186	0.0185036	0.0449897	0.00290297	0.000349182	0.00946378	0.00714001	0.000848153	0.00495475	0.0111347	0.00408402	0.00074017	0.00846494	0.000366425	0.000611041	0.00167402	0.0089605	0.0002121	0.00259703	0.000330189	0	0.000773242	0.0014113	0.00103743	0.000146889	0.00051188	0.00321042	0.00055153	0.000864534
ASV_33	d__Bacteria	p__Proteobacteria	c__Gammaproteobacteria	o__Burkholderiales	f__Comamonadaceae	g__Curvibacter		0.148028	0.265693	0	0	0.000821512	0.00235581	0.000574652	0.0223121	0.0139334	0.00166266	0.000179695	0.00044632	0.00247912	0.00167105	0.00267762	0.000216681	0	0.000123655	0.00445951	0	0.00407456	0.013113	0.0308633	0.0322976	0.00628888	0.00034562	0.00362493	0.000580965	0.00096848	0.00195672
ASV_34	d__Bacteria	p__Proteobacteria	c__Gammaproteobacteria	o__Burkholderiales	f__Comamonadaceae			0.0727462	0.265693	0.0287773	0.0225921	0.00179796	0.000334633	0.00755862	0.0086639	0.0021472	0.00379484	0.0191418	0.00267439	0.00111689	0.00771745	0.000469564	0.000553032	0.00191177	0.00716728	0.000202959	0.00147956	0.00155708	0	0.000595371	0.000929368	0.00022431	0.000264705	0.000245276	0.00165107	0.000114902	0.000432267
ASV_36	d__Bacteria	p__Proteobacteria	c__Gammaproteobacteria	o__Burkholderiales	f__Comamonadaceae			0.104623	0.214323	0	0	0.000280516	0.00175693	3.05422e-05	0.00565414	0.00290616	0.00041425	0	0	0.00275711	0.0018655	0.0371996	0.000759949	0.001796	0	0.0019986	0	0.0106237	0.00460335	0.0189184	0	7.00967e-05	0.000968134	0.00325515	0.00146302	0.00647832	0.000823452
ASV_37	d__Bacteria	p__Bacteroidota	c__Bacteroidia	o__Flavobacteriales	f__Weeksellaceae	g__Cloacibacterium	s__uncultured_bacterium	0.142215	0.214323	3.42764e-05	0.00019874	0.00363986	0.021526	0.00383926	0.000808731	0.00359352	0.000381351	0.000623106	0.00686024	0.00126636	0.000578629	0.000283539	0.000107925	0.00137575	0.0298846	0.00100254	0.00344079	0.00709335	0.010732	0.00543784	0.00418608	0.00111927	0.000717697	0.000446793	0.0190252	0.0113843	0.00285977
ASV_38	d__Bacteria	p__Proteobacteria	c__Gammaproteobacteria	o__Burkholderiales	f__Oxalobacteraceae	g__Herminiimonas		0.000277205	0.221034	0.088788	0.0724133	0	0	0	0	0	0	0.000277205	0	0	0	0	0	0	0	0	0	0	0	0	0	0	0	0	0	0	0
ASV_39	d__Bacteria	p__Proteobacteria	c__Gammaproteobacteria	o__Burkholderiales	f__Comamonadaceae			0.0624268	0.0598331	0.00047987	0	0.000340627	0.000809649	0.0063139	0.0109715	0.00281516	0.00504693	0.0174788	0.00528528	0.00314865	0.00351803	0	0.000362555	0.000938407	0.00300478	9.94422e-05	0.00091466	0	0	0.000620392	0	0.000238329	0	0.000213283	0	0.000306405	0
ASV_40	d__Bacteria	p__Proteobacteria	c__Gammaproteobacteria	o__Burkholderiales	f__Comamonadaceae	g__Hydrogenophaga		0.117068	0.059842	0.000328074	0.000214028	0.00437946	0.00147656	0.0128061	0.010004	0.0272219	0.00481177	0.0131957	0.00317599	0.00193097	0.00774966	0.000791119	0.000888809	0.00324298	0.0018579	0.0002626	0.00107584	0.018493	0.000500069	0.00116979	0.00109834	0.0004346	0	0.00025594	0	0.000245124	0
ASV_41	d__Bacteria	p__Actinobacteriota	c__Actinobacteria	o__Corynebacteriales	f__Corynebacteriaceae	g__Corynebacterium	s__uncultured_bacterium	0.171975	0.0868368	0	0	0.000520959	0	0	0.00171002	0	0	0	0.00293	0	0.00390934	0	0	0.000487154	0.00361308	0.000356048	0.044498	0.0267853	0.0213626	0.00991785	0.0071706	0.00370111	0.0075232	0.0343773	0.00262955	8.42615e-05	0.000399016
ASV_42	d__Bacteria	p__Firmicutes	c__Bacilli	o__Lactobacillales	f__Streptococcaceae	g__Streptococcus	s__uncultured_bacterium	0.144419	0.0868368	0.00011575	0	0.000420774	0.00339669	0.000547463	0.000608999	0.00545362	0.000330579	0.00112808	0.000701235	0.000979314	0.00114132	0.00150136	0.000322658	0.000414983	0.0121561	0.00366689	0.000553851	0.00765844	0.0154642	0.00152195	0.000481935	0.000236232	0.00127303	0.026515	0.00404806	0.0379642	0.0159322
ASV_43	d__Bacteria	p__Proteobacteria	c__Gammaproteobacteria	o__Burkholderiales	f__Comamonadaceae			0.0363171	0.086721	0.024787	0.0228075	0.000340627	0.000271326	0.00952314	0.00571814	0	0.00226537	0.00401872	0	0	0.0100626	0.000768377	0.000703357	0.00039694	0.000565278	0.000515099	0.00116819	0	0	0	0	0	0	0	0	0	0
ASV_45	d__Bacteria	p__Proteobacteria	c__Gammaproteobacteria	o__Pseudomonadales	f__Pseudomonadaceae	g__Pseudomonas		0.165386	0.0391266	0	0	0.132989	0.0051945	0.00161849	0	0	0	0	0.00180557	0	0.000369125	0	0	0.00167797	0.000612384	0	0.000650026	0.000487421	0	0	0.000890849	0	0.000613476	0	0.00056336	0.000298745	0.0176154
ASV_46	d__Bacteria	p__Chloroflexi	c__Dehalococcoidia	o__GIF9	f__AB-539-J10	g__AB-539-J10	s__uncultured_bacterium	0.0133241	0.0391266	0	0	0	0	0.000128876	0	0	0	0.000420254	0.00299634	0.000596044	0	0	0.00257708	0.00227996	5.29948e-05	0	0.00183054	0	0	0	0.000175249	9.44927e-05	0	0	0.00145562	0.000146739	0.00056991
ASV_47	d__Bacteria	p__Proteobacteria	c__Gammaproteobacteria	o__Pseudomonadales	f__Moraxellaceae	g__Acinetobacter		0.137327	0.0396307	0.00130262	0.000565467	0	0	0.000197136	0	0.00407539	0	0.00110812	0.00087108	0	0.0014909	0.00134122	0.000766935	0.0478348	0.0010579	0.000662948	0	0.00205189	0.00597902	0.014296	0.0014363	0.00064489	0.00934827	0.000394574	0.0145241	0.0254216	0.0038239
ASV_48	d__Bacteria	p__Firmicutes	c__Clostridia	o__Peptostreptococcales-Tissierellales	f__Peptostreptococcales-Tissierellales	g__Finegoldia	s__uncultured_bacterium	0.0878793	0.0379983	0	0.000183453	0.000511995	0.000698365	0.000121279	0.000923008	0.000976635	0.00418311	0.00022961	0.000280102	0.000563825	0.00969753	0.0018594	0.000348053	0.00115906	0.00086939	0.0212015	0.000755337	0.000290697	0.0051983	0.000277709	0.00296757	0.00270511	0.00915972	0.000435026	0.00115263	0.0208748	0.000439622
ASV_49	d__Bacteria	p__Proteobacteria	c__Alphaproteobacteria	o__Rhizobiales	f__Xanthobacteraceae	g__Bradyrhizobium	s__Bradyrhizobium_sp.	0.076237	0.0378149	0.000879862	0.000275179	0.00098541	0.0252064	0.000157795	4.95272e-05	0.0103938	0	0	0	0.000741027	0	0.00143004	0	0	0	0.000676699	0	0.012171	0.0126787	0.0101219	0	0.000118116	0.000418292	0.000331142	0.000404915	0.000352175	0
ASV_51	d__Bacteria	p__Proteobacteria	c__Alphaproteobacteria	o__Caulobacterales	f__Caulobacteraceae	g__Caulobacter		0.0578174	0.0366598	0.000445594	0.000504495	0.0003517	0.0016952	0.000144645	0	0.00124613	0.000390684	0.000688829	0	0.000783935	0	0.00897265	0.000111269	0.00039694	0.00150503	0.0109045	0.000908763	0.000890311	0.00308385	0.000831377	0.00491707	0.0131027	0.000863576	0.000670005	0.000299285	0.00487185	0.00018704
ASV_52	d__Bacteria	p__Bacteroidota	c__Bacteroidia	o__Cytophagales	f__Microscillaceae	g__uncultured	s__uncultured_bacterium	0.0868467	0.0357097	0	0	0.000480885	0.000135663	0.000168901	4.50248e-05	0	6.90417e-05	1.99661e-05	0.000547756	0	0.000189551	4.05055e-05	9.36999e-05	0	0.00326608	0.00393252	0.000319172	0.000484556	0.00370795	0.000277343	0.00224472	0.0094139	0.0434126	0.00836059	0.00166408	0.00318111	0.00479109
ASV_53	d__Bacteria	p__Proteobacteria	c__Alphaproteobacteria	o__Sphingomonadales	f__Sphingomonadaceae	g__Sphingomonas		0.105422	0.0357097	0	0	0	0	0.000711544	0.00360698	0.000468128	0.00438768	0.000143485	0.000398885	0.0143364	0	0.00011139	0.000322093	0.000589206	0.00136164	0.000976708	0.0011103	0	0.000124719	0.0012562	0.00540419	0.0385185	0.000195918	0.00805317	0.00116743	0.0020837	0.0200937
ASV_54	d__Bacteria	p__Proteobacteria	c__Gammaproteobacteria	o__Enterobacterales	f__Enterobacteriaceae			0.107388	0.0357097	0	0	0.00123095	0	0.000523832	0.000913361	0.00171498	0.0002855	0.00143673	0.00371267	0.0283961	0.00027652	0.000759649	0.0046722	0.00437066	0.00201969	0	0.0038189	0.00391494	0.00759105	0.0140085	0.00116303	0.00554007	0.000515478	0.000309261	0.0174893	0.00108994	0.0016346
ASV_55	d__Bacteria	p__Proteobacteria	c__Alphaproteobacteria	o__Rhodobacterales	f__Rhodobacteraceae	g__Paracoccus		0.0615894	0.0357097	0	0	0	0.00080021	0	0	0.00194556	0	0.000122697	0.000162298	0.0102932	0	0.000960471	0	0	0.00637685	0.0164221	0.0160444	0.000196541	0.00355329	0	0.00152078	0	0	0	0	0.000650824	0.00254006
ASV_57	d__Bacteria	p__Proteobacteria	c__Gammaproteobacteria	o__Pseudomonadales	f__Moraxellaceae	g__Acinetobacter		0.103138	0.0357097	0	0	0.00032059	0.00059652	0.000157795	0	0.000875513	0.00171588	0	0	0.00816817	0	0.00134466	0.0003263	0	0.00289116	0.000858499	0.00668234	0.00493816	0.0115811	0.023212	0.00597307	0	0	0	0.014357	0.0106228	0.00851652
ASV_58	d__Bacteria	p__Actinobacteriota	c__Actinobacteria	o__Corynebacteriales	f__Corynebacteriaceae	g__Corynebacterium	s__uncultured_bacterium	0.0621339	0.0357097	0	0	0	0.000247337	0	0.00026096	0.0111297	0.000303373	0.000353056	0	0.00054522	0.00180473	0.000749522	0.00288622	0.00245963	8.24363e-05	0.00395014	0.000975039	0.00225037	0.0068052	0.00033129	0.000997194	0.0135878	0.00018587	0.000132383	0.0116369	0.000322827	0.000136683
ASV_60	d__Bacteria	p__Proteobacteria	c__Gammaproteobacteria	o__Pseudomonadales	f__Pseudomonadaceae	g__Pseudomonas		0.0302215	0.0357097	0.00279433	0.00414999	0.0020435	0.000509224	0.00494726	0.000261144	0.000300958	0.00373636	0.00273825	0.00307622	0.00256087	0.00117769	0.000256126	0.000636138	0.00132802	0.000980381	0.000182759	0.000798303	0	0	0.000837115	0	0.00057115	0	0.00071781	0.00128417	0.000513229	0.00076478
ASV_61	d__Bacteria	p__Proteobacteria	c__Gammaproteobacteria	o__Pseudomonadales	f__Moraxellaceae	g__Acinetobacter		0.0743741	0.0287654	0	0	0.000468933	0.000130943	0.000683779	0.00026096	0.000246238	0.000796394	0	0	0.000128874	0.000103698	0.000784266	0.00643184	0.000783354	0.00152659	0.0002323	0	0.000622831	0.000123614	0.00112569	0.000675904	0.000283478	0.00151623	0.0457353	0.0100298	0.00168308	0
ASV_62	d__Bacteria	p__Proteobacteria	c__Gammaproteobacteria	o__Pseudomonadales	f__Pseudomonadaceae	g__Pseudomonas		0.058368	0.0287654	0.000488721	0	0	0	0.0116467	0.00325266	0.00144476	0.00135237	0.00577072	0.00323558	0.00161706	0.00595702	0	0.0010079	0.0021997	0.00361542	0	0.000282795	0.00649524	0.00059026	0.00754033	0	0.000940658	0.000459751	0.000576051	0	0.000383007	0
ASV_64	d__Bacteria	p__Proteobacteria	c__Gammaproteobacteria	o__Burkholderiales	f__Oxalobacteraceae	g__Massilia		0.0698504	0.0283746	0.0135956	0.0139413	0.00428789	0.000509224	0.00160564	0.0005448	0.000465116	0.00165289	0.000440801	0.000486894	0.0107628	0	0.000490908	0	0	0.000484042	0.0002626	0.000527884	0.00196607	0.011893	0.0202611	0	0.00188985	0	0.000197657	0.00192625	0.000183843	0.00901111
ASV_65	d__Bacteria	p__Proteobacteria	c__Alphaproteobacteria	o__Sphingomonadales	f__Sphingomonadaceae	g__Sphingopyxis	s__uncultured_bacterium	0.0631483	0.000837742	0	0	0.000661217	0.000305535	0.000525984	0.000117064	0.000246238	0.000345605	0	0.000284022	0.00022553	0.0027435	0.000469564	0.000336319	9.02136e-05	0.000359187	0.0002323	0	0.000243711	0.000894553	0.000358914	0.000365102	0.00019686	0.0195096	0.0288262	0.00302146	0.0016746	0.00111504
ASV_67	d__Bacteria	p__Bacteroidota	c__Bacteroidia	o__Sphingobacteriales	f__NS11-12_marine_group	g__NS11-12_marine_group	s__uncultured_bacterium	0.0588649	0.000837742	0	0	0.000120221	0.000189928	9.14702e-05	0.00026096	0.000165966	0.000552334	0.000209644	0.000279122	4.83279e-05	1.8813e-05	6.07583e-05	0.000181278	0	0.0028549	0.00797303	0.00152629	0.000494731	0.000286774	0.000228767	0.00304578	0.00266861	0.000433631	0.0279469	0.00668991	0.00120207	0.00133469
ASV_68	d__Bacteria	p__Proteobacteria	c__Alphaproteobacteria	o__Rhizobiales	f__Rhizobiaceae	g__Allorhizobium-Neorhizobium-Pararhizobium-Rhizobium		0.10215	0.000837742	0	0	0.000881622	0.000174591	1.38828e-05	0.000121567	0.000547196	0.000379729	0	0.000973789	0.000418841	0.000244421	0.000384189	0.00013052	0	0.000761053	0.0002828	0	0.00100037	0.0128713	0.000226081	0.06951	0.000918764	0.00044455	0.0117732	0	9.19216e-05	0
ASV_69	d__Bacteria	p__Proteobacteria	c__Gammaproteobacteria	o__Cellvibrionales	f__Cellvibrionaceae	g__Cellvibrio	s__uncultured_bacterium	0.0718919	0.000837742	0	0	0.000965373	0.000999187	0.000355039	6.30347e-05	0.000479457	0.000345605	0.000159728	0.000818058	0.000820288	0.000241173	0.0005353	0.000283613	0.000487154	0.00257495	9.08999e-05	0.000616888	0.00698289	0.00725338	0.00102483	0.00804254	0.000374696	0.00111944	0.0218545	0.0127283	0.00245249	0.000223009
ASV_71	d__Bacteria	p__Proteobacteria	c__Gammaproteobacteria	o__Pseudomonadales	f__Pseudomonadaceae	g__Pseudomonas		0.1025	0.000837742	0.000122416	0.00038169	0.0111958	0	0.000691363	0.000913361	0	0.0216446	0.0010582	0.00044632	0	0	0.00652592	0.0016456	0.00355442	0.000400405	0.00057702	0.0409191	0	0.000322706	0	0.000335894	0.000344155	0	0	0.0113426	0	0.0005827
ASV_72	d__Bacteria	p__Proteobacteria	c__Gammaproteobacteria	o__Alteromonadales	f__Shewanellaceae	g__Shewanella		0.0558008	0.000333636	0.000205128	3.05754e-05	0.00329237	0.0242733	0.0080079	0.00108059	0.000519836	0.00173538	0.00532395	0.00178597	0.00125196	0.000175273	0.000234782	0.000217533	0.0013502	0.000146601	0.0002525	0.00149055	0	0.000104096	0.000576371	0.000102229	0.000337237	0	0.000460215	0.00236548	0.00048369	0.000232759
ASV_73	d__Bacteria	p__Firmicutes	c__Bacilli	o__Bacillales	f__Bacillaceae	g__Bacillus		0.171431	0.0518002	0	0	0	0.000509224	0	9.00495e-05	0.0199292	0.000195342	0.000119796	0	0.000579934	0.000379102	0.101282	0.000203031	0.00201044	4.09574e-05	0.000595899	0	0.0347374	0.000823669	0.000668601	0	0	0	0.00926716	0	0	0
ASV_74	d__Archaea	p__Crenarchaeota	c__Bathyarchaeia	o__Bathyarchaeia	f__Bathyarchaeia	g__Bathyarchaeia	s__uncultured_archaeon	0.0670142	0.0518002	0	0	0	0	7.88975e-05	0	0	0.000300526	0	0.00974026	0	0.000403589	0.00111704	0.0491416	0.00242242	0	0	0	0	0	0.00214885	0	0.000244106	0	0.000272306	0	0.00114457	0
ASV_75	d__Bacteria	p__Bacteroidota	c__Bacteroidia	o__Cytophagales	f__Hymenobacteraceae	g__Hymenobacter	s__uncultured_bacterium	0.023491	0.0518002	0	0	0.00234405	0.00147459	0.00105244	0	0	0	0.000139762	0	0	0	0	0	0.000324769	0	0	0.000520021	0	0	0	0.00249504	0.0146888	0	0	0.000299285	5.86958e-05	9.35198e-05
ASV_76	d__Bacteria	p__Proteobacteria	c__Gammaproteobacteria	o__Aeromonadales	f__Aeromonadaceae	g__Aeromonas		0.106435	0.0518002	0	0	0.0358992	0.00123198	0.000911192	0.000597023	0	0.00136458	0	0.00106641	0.000391968	0.000253343	0.000131643	0.000293664	0.000942729	0.00168376	4.26181e-05	0.000414766	0.0145512	0.0068975	0.0206799	0.000365102	0.000322261	0	5.33208e-05	0.00944781	0.000846301	0.00804682
ASV_78	d__Bacteria	p__Firmicutes	c__Bacilli	o__Bacillales	f__Planococcaceae	g__Lysinibacillus		0.013026	0.0518002	0	0	0.00568397	0.00327478	0.00130521	0	0	0	0.000269542	0	0	0	0	0	0.000523239	0	0	0.00107254	0	0	0	0	0	0	0	0.000616175	0	0.000280559
ASV_80	d__Bacteria	p__Proteobacteria	c__Gammaproteobacteria	o__Burkholderiales	f__Comamonadaceae			0.059283	0.0518002	0	0	0	0	0	0	0	0	0.00042927	0	0	0	0	0	0.000324769	0.00772468	0.0123671	0.0115112	0	0	0	0	0	0	0	0	0.00843472	0.0184913
ASV_81	d__Bacteria	p__Firmicutes	c__Bacilli	o__Alicyclobacillales	f__Alicyclobacillaceae	g__Tumebacillus	s__uncultured_bacterium	0.109211	0.0522496	0	0	0	0	1.38828e-05	0	0	0.000105184	0.000282353	0.000620085	0.000392396	0.000377423	0.00149686	0.0139119	0.0883086	0	0	0.000881466	0	0	0.000181125	0	7.5285e-05	0	3.95313e-05	0.0017419	0.000176087	0.000606677
ASV_83	d__Bacteria	p__Actinobacteriota	c__Actinobacteria	o__Micrococcales	f__Dermabacteraceae	g__Brachybacterium		0.117424	0.0655725	0	0	0	0.000352724	7.88975e-05	0	0.000313491	0.000165289	0	0.000202873	0.0385479	4.98818e-05	0.0147612	6.44187e-05	0	0.00215088	3.03e-05	0.00607454	0.00102322	0.000750315	0.0184248	0.0336325	0.000119072	0.000125387	0.000347322	0.000158445	0	5.03568e-05
ASV_84	d__Bacteria	p__Firmicutes	c__Bacilli	o__Bacillales	f__Bacillaceae	g__Anoxybacillus	s__uncultured_organism	0.10199	0.0655725	0	0	0.0026736	0.0457468	0.000620964	0.000607834	0.000711354	0	0.000472611	0	0.000193311	0.000226209	0.000813554	0.000501699	0.0395231	0	0.0003636	0.000659799	0	0.000182168	0	0	0	0.000207372	0.00761833	0.000867248	0	0
ASV_85	d__Bacteria	p__Bacteroidota	c__Bacteroidia	o__Flavobacteriales	f__Weeksellaceae			0.046644	0.0655725	0	0	0.0009543	0.000261887	2.22125e-05	0.000112562	0.000601915	0	0.00021165	0.0150027	0.000515497	0.000124704	0.000298813	2.90044e-05	0.000353523	0.0156078	0.00103023	0.00123187	0.000448113	0.000963015	0.00553023	0.00150001	0.000423083	0.000216013	0	0.00094507	0	0.000259776
ASV_86	d__Bacteria	p__Proteobacteria	c__Alphaproteobacteria	o__Rhizobiales	f__Rhizobiaceae	g__Ochrobactrum		0.0821438	0.0655725	0	0	0.00155154	0.0232765	0.00050335	0.000305985	0.0282627	0.000435763	9.98303e-05	0	0.000322186	0	0.000405532	0.000105412	0	0.000290425	0.00131193	0	0.000272291	0.00561469	0.00075119	0	8.66183e-05	0.000409651	0.0163568	0.0014	0.000381523	0
ASV_87	d__Bacteria	p__Proteobacteria	c__Alphaproteobacteria	o__Caulobacterales	f__Caulobacteraceae	g__Brevundimonas		0.113721	0.0656754	9.79326e-05	0	0.046328	0.00141757	0.000278341	0.00133534	0.000656635	0	0	0.00224963	0.0402174	0.00293511	0.000362845	0.000117125	0	0.000211718	0.0002424	0	0.000680728	0.00016265	0.000163143	0.00939513	0	0.000129608	0.00380365	0.000158445	0.00287609	0
ASV_90	d__Bacteria	p__Actinobacteriota	c__Actinobacteria	o__Streptomycetales	f__Streptomycetaceae	g__Streptomyces		0.0514567	0.0655774	0	0	0.000440811	0	0	0	0	0	0	0.000568043	0	0.000119716	0	0	0	0.000317969	0	0	0.0475697	0.000969819	0.00113606	0.000248269	0	8.6405e-05	0	0	0	0
ASV_91	d__Bacteria	p__Bacteroidota	c__Bacteroidia	o__Flavobacteriales	f__Weeksellaceae	g__Cloacibacterium		0.0353416	0.0655774	0	0	0	0	0	0	0.000683995	0	0	0.00328635	4.83279e-05	0	6.40314e-05	0	0.000117841	0.0174117	0.000585799	0	0	0.00178171	0	0	0	0.000630955	0.000150219	0.0105806	0	0
ASV_92	d__Bacteria	p__Proteobacteria	c__Alphaproteobacteria	o__Sphingomonadales	f__Sphingomonadaceae	g__Sphingobium		0.0614113	0.0656031	0	0	0.000140258	0.000162796	0.000144645	6.30347e-05	0	0.000150263	0.000109813	0.000263734	0	8.4799e-05	0	0.000146406	0.000324769	0.000335021	0.00298704	0.00444537	0.0100152	0.00165758	0.00643486	0.000219061	0	0.000124851	0.00375253	0.0147187	0.00919566	0.00593491
ASV_93	d__Bacteria	p__Actinobacteriota	c__Actinobacteria	o__Micrococcales	f__Micrococcaceae	g__Micrococcus		0.0368321	0.0656031	0	0	0	0	0	0	0	0	0	0	0	0	0.00036455	0	0	0.000264452	0.0209598	0.0010401	0	0.000659231	0	0.00306352	0.0104804	0	0	0	0	0
ASV_94	d__Bacteria	p__Actinobacteriota	c__Actinobacteria	o__Corynebacteriales	f__Corynebacteriaceae	g__Corynebacterium		0.0806465	0.115538	0	0	0	0	0	0.000904448	0.0227206	0	0.00042927	0.0087504	0.0182114	0.000639641	0.000425308	0	0	0	0	0	0.00805232	0.00152483	0	0.0070125	0	0.0119757	0	0	0	0
ASV_95	d__Bacteria	p__Actinobacteriota	c__Actinobacteria	o__Corynebacteriales	f__Corynebacteriaceae	g__Corynebacterium	s__uncultured_bacterium	0.0409083	0.115538	0	0	0	0.000461255	0	0	0	0	0.000563498	0	0.000964844	0	0	0	0	0.000229644	0.016478	0.000812533	0	0.012493	0.000424171	0	0	0.000103686	0.00809601	0.00028168	0	0
ASV_96	d__Bacteria	p__Campilobacterota	c__Campylobacteria	o__Campylobacterales	f__Sulfurimonadaceae	g__Sulfurimonas	s__uncultured_bacterium	0.000408458	0.115538	0.0237039	0.0279984	0	0	0	0	0	0	0.000236306	0	0	0	0	0	0	0	0	0.000150824	0	0	0	0	0	0	2.13283e-05	0	0	0
ASV_97	d__Bacteria	p__Caldisericota	c__Caldisericia	o__Caldisericales	f__Caldisericaceae	g__Caldisericum	s__uncultured_bacterium	0.00752313	0.0638357	0	0	0	0	0.000106819	0	0	0.00136296	0	0	0.000128874	1.99527e-05	0	0.00310958	0	0.000167122	0.000378765	0.00106872	0	0	0.000242762	0	0.000378522	0	0.000298597	0	0.000260445	0
ASV_98	d__Bacteria	p__Deinococcota	c__Deinococci	o__Thermales	f__Thermaceae	g__Thermus		0.028436	0.0638357	0	0	0	0.000162796	0	0	0	0	0.000220666	0	0.000180908	0	0	0	0	0	0.00910226	0.000757939	0	8.90853e-05	0	0	0.00112604	0	0	0.000228865	6.12811e-05	0.0165062
ASV_99	d__Bacteria	p__Proteobacteria	c__Gammaproteobacteria	o__Burkholderiales	f__Comamonadaceae	g__Comamonas		0.0646974	0.0638357	0	0	0.00130002	0.000537933	0	7.65421e-05	0	0	0	0.000426033	0.000391968	0.000176155	0.00328095	0	0	0.000153096	0.000104178	0	0.00873743	0.00538889	0.0003426	0.043381	0	7.77645e-05	0	0	0.000322827	0
ASV_100	d__Bacteria	p__Acidobacteriota	c__Subgroup_5	o__Subgroup_5	f__Subgroup_5	g__Subgroup_5		0.0420456	0.0638357	0	0	0	0	4.72015e-05	0	0	0.000552334	0	0	0	0	0	0.000116018	0	0	0	0	0	0	8.09207e-05	0	0.000196271	0	8.53133e-05	0	0.040288	0.000679575
ASV_101	d__Bacteria	p__Proteobacteria	c__Gammaproteobacteria	o__Burkholderiales	f__Methylophilaceae	g__Methylotenera		0.0142312	0.0659569	0	0	0	0.00039283	0.00132417	0.000342188	0.000793434	0	0.000817981	0	0.00067659	0	0.000875096	0.00501294	0	7.06597e-05	0.00109209	0.000509031	0	0.000149638	0.00120726	0	0.000244106	0	0.000600876	0	0	0.000122295
ASV_102	d__Bacteria	p__Actinobacteriota	c__Actinobacteria	o__Corynebacteriales	f__Nocardiaceae	g__Rhodococcus	s__Rhodococcus_sp.	0.0359469	0.0659569	0.00044937	0	0	0.000349182	0	0	0.000902873	0	0	0.000802671	0.0317245	0	0.000704346	0	0	0	0.000525199	0	0	0.000631083	0	0	0	0	0	0	0.000199068	0.000107907
ASV_103	d__Bacteria	p__Bacteroidota	c__Bacteroidia	o__Flavobacteriales	f__Flavobacteriaceae	g__Flavobacterium		0.0110679	0.0655075	0.00492525	0.00839764	0.000806572	0	0.00412597	0.00144529	0	0.00113919	0.00145412	0.00066948	0.000344068	0	0	0.000123269	0	5.29948e-05	0	0.000282795	0	0	0.000215789	0	0.000280387	0	0.00012797	0	0	0
ASV_104	d__Bacteria	p__Firmicutes	c__Bacilli	o__Bacillales	f__Salisediminibacteriaceae			0.00798567	0.0521846	0	0	0.00343711	0.00195354	0.000806837	0	0	0	0.00022961	0	0	0	0	0	0.000469111	0	0	0.000617525	0	0	0	0	0	0	0	0.000299285	0	0.000172652
ASV_105	d__Bacteria	p__Proteobacteria	c__Alphaproteobacteria	o__Sphingomonadales	f__Sphingomonadaceae	g__Sphingomonas		0.0578294	0.0521846	0	0	0.024465	0.00110063	0.000499684	0	0	0.00052592	0	0.000852065	0	9.40649e-05	0	0.000128837	0	0.00130319	0	0	0	0.0086595	0.000358914	0.00453844	0.0141923	0	0.000142313	0	0.00096848	0
ASV_107	d__Bacteria	p__Firmicutes	c__Bacilli	o__Lactobacillales	f__Streptococcaceae	g__Lactococcus	s__Lactococcus_lactis	0.0449072	0.0521846	0	0	0.000520959	0.00550792	0.000116303	7.20396e-05	0	0	9.08868e-06	0.000344884	0	0.000174586	0.00011139	0.00241501	0.000280226	0.00265275	0.000114577	0.00361805	0.00043239	0.0134533	0.000180474	0.000530942	0	0.00027174	0.00304391	0.000730109	0.000251396	0.0100751
ASV_108	d__Bacteria	p__Proteobacteria	c__Gammaproteobacteria	o__Burkholderiales	f__Neisseriaceae	g__Neisseria	s__uncultured_bacterium	0.0474635	0.0521846	0.000102889	0	0	0.000475016	0	0	0.000576965	0	0	0.00121596	0.033682	5.26763e-05	0.000683002	0	0	0	0.0012655	0	0.000622831	0.000605271	0	0	0	0.00633899	0.00120505	0.000123235	0.000390475	0.000226525
ASV_109	d__Bacteria	p__Proteobacteria	c__Gammaproteobacteria	o__Pseudomonadales	f__Moraxellaceae	g__Acinetobacter	s__Acinetobacter_sp.	0.0582476	0.0520817	0	0	0	0.0011321	0	0.00057595	0.0328325	0.00128823	0.000505557	0	0.000772389	4.89137e-05	0.000965449	0	0	0.000212064	0.0184494	0.000832715	0	0.0006324	0	0	0	0	0	0	0	0
ASV_110	d__Bacteria	p__Actinobacteriota	c__Actinobacteria	o__Micrococcales	f__Micrococcaceae	g__Kocuria		0.0253737	0.0520817	0	0	0.000996483	0	0.000144645	0.000826374	0	0	0	0.000752296	0	6.39641e-05	0.000141769	0	0	0.00179888	0.0001818	0.00328493	0.00878253	0.000774215	0.0002284	0.00168976	0	0.000112327	0	0.0055953	0	0
ASV_111	d__Bacteria	p__Actinobacteriota	c__Actinobacteria	o__Propionibacteriales	f__Propionibacteriaceae	g__Cutibacterium		0.0561508	0.0520817	2.57221e-05	0	0.00117233	0.00105817	0	0.00139179	0	0.000751315	8.63424e-05	0.00154419	0	0.00276927	0	0	0	0.00230478	0	0	0.0117893	0.00709119	0.0240799	0.0021122	0	0	0	0	0	0
ASV_112	d__Bacteria	p__Bacteroidota	c__Bacteroidia	o__Sphingobacteriales	f__NS11-12_marine_group	g__NS11-12_marine_group		0.0444803	0.052728	0	0	0.00032059	0	0	0.000168031	0	0	0	0.000385458	6.03027e-05	0.00016461	4.05055e-05	0	0	0.00102005	0	7.54119e-05	0.000479192	0.00245875	4.49559e-05	0.000496539	5.60774e-05	0.0363057	0.000393472	0.000475335	5.86958e-05	0.00147665
ASV_113	d__Bacteria	p__Proteobacteria	c__Gammaproteobacteria	o__Burkholderiales	f__Burkholderiaceae	g__Ralstonia		0	0.052728	0.0253935	0.0245414	0	0	0	0	0	0	0	0	0	0	0	0	0	0	0	0	0	0	0	0	0	0	0	0	0	0
ASV_114	d__Bacteria	p__Proteobacteria	c__Alphaproteobacteria	o__Sphingomonadales	f__Sphingomonadaceae	g__Novosphingobium		0.00671477	0.00279317	0	0	0.00220827	0.00129332	0.000649619	0	0	0	0.000339423	0	0	0	0	0	0.000739752	0	0	0.000910036	0	0	0	0	0	0	0	0.00038731	0	0.00018704
ASV_115	d__Bacteria	p__Firmicutes	c__Bacilli	o__Lactobacillales	f__Aerococcaceae			0.00556689	0.00279317	0	0	0	0.00059652	0	0	0.000793434	0	0	0	0.000563825	0	0.00117391	0	0	0	0.0010403	0	0	0.000338313	0	0	0	0	0	0	0.000923908	0.000136683
ASV_116	d__Bacteria	p__Firmicutes	c__Bacilli	o__Lactobacillales	f__Streptococcaceae	g__Streptococcus		0.0337643	0.00279317	0	0	0	0	4.72015e-05	0	0	0.000483292	0	0	0	0	0	0.000591491	0	0.00451633	0	0.000845034	0.00240235	0	0.000215789	0.00100347	0.000660455	9.50455e-05	0.0125304	0	0.0102799	9.35198e-05
ASV_117	d__Bacteria	p__Bacteroidota	c__Bacteroidia	o__Bacteroidales	f__Prevotellaceae	g__Prevotella	s__uncultured_bacterium	0.0438883	0.00279317	0	0	0.000120221	0	0	0	0	0	0	0.000202873	0	7.48227e-05	0	0	0	0.000158984	0.010599	7.54119e-05	0.000133648	7.15661e-05	0	0.000131437	0	0.0314169	6.3985e-05	0.00083944	0	0
ASV_118	d__Bacteria	p__Proteobacteria	c__Alphaproteobacteria	o__Rhodobacterales	f__Rhodobacteraceae	g__Paracoccus		0.0521616	0.00279317	0	0	0.00117233	0	0	0	0	0	0	0.00475135	0	0.00010159	0.000101264	0	0	0.00135159	0	0.000178757	0.0116	0.000293876	0.000125877	0	0	0.0308541	0.00025594	0.00137499	0	0
ASV_119	d__Bacteria	p__Actinobacteriota	c__Actinobacteria	o__Actinomycetales	f__Actinomycetaceae	g__Actinomyces		0.022695	0.00279317	0	0	0	0.000116394	0	0	0.000191518	0	0	0	0.000144984	0	0.000241635	0.00252907	0.000162385	0	0.0002424	0	0.0145476	9.75902e-05	0	0	0	0	0	0	0.00429197	0.000129489
ASV_120	d__Bacteria	p__Bacteroidota	c__Bacteroidia	o__Flavobacteriales	f__Flavobacteriaceae	g__Flavobacterium		0.00712185	0.00279317	0.000740808	0.00138032	0.000468933	0	0.00131211	0	0	0.000724938	0.000181774	0	0	0	0	0.000137771	0	0.002111	3.78827e-05	0.00085417	0	0	0.0003057	0	0.000448619	9.75229e-05	0.000234612	0	0.000206824	0
ASV_121	d__Bacteria	p__Proteobacteria	c__Alphaproteobacteria	o__Sphingomonadales	f__Sphingomonadaceae	g__Sphingomonas		0.0369507	0.000672038	0	0	0	0.000895377	2.22125e-05	3.15173e-05	0	0.000310688	0	0.000182585	0	0	0	0.000101515	0	0	0.00286962	0	0.000133648	5.85541e-05	0.000161841	0.000102229	0.000322445	0.0163187	0.0137154	0.00172429	0	0
ASV_122	d__Bacteria	p__Actinobacteriota	c__Actinobacteria	o__Bifidobacteriales	f__Bifidobacteriaceae			0.0476116	0.00102366	0	0	0.00219483	0	0	4.05223e-05	0	0	0	6.08618e-05	0	6.98345e-05	0	0	0	0.000100101	0.0001616	0	0.00073058	0.00822751	0.000249718	0.000160645	0	0.0240458	0.000294736	0.0112749	0	0
ASV_123	d__Bacteria	p__Proteobacteria	c__Alphaproteobacteria	o__Caulobacterales	f__Caulobacteraceae	g__Brevundimonas		0.0232742	0.00102366	0	0	0.00111372	0	0.000242402	0.00104537	0	0.000663607	0.000109064	0.00102946	0	8.6368e-05	0	4.68499e-05	0	0.00538197	0.000259453	0	0.00124834	0	0.00409627	0.00145404	0.00419377	0.000290091	0.00112581	0	0.000573026	0.000314609
ASV_124	d__Bacteria	p__Campilobacterota	c__Campylobacteria	o__Campylobacterales	f__Sulfurimonadaceae	g__Sulfuricurvum		0.0201079	0.00102366	0	0	0	0	0.00151045	0.00139577	0	0.00126221	0	0	0	0.00451929	0	0.00830415	0	0	0	0	0	0	0.00311603	0	0	0	0	0	0	0
ASV_125	d__Bacteria	p__Bacteroidota	c__Bacteroidia	o__Flavobacteriales	f__Weeksellaceae	g__Cloacibacterium		0.00402226	0.00424794	0	0	0.000400737	0	0	8.55471e-05	0	0	0	0.00153762	0	0.000174586	0	0	0	0.000582943	0	0	0.000283019	0	0	0.000686392	0	0.00016417	0	0	0.000107242	0
ASV_126	d__Bacteria	p__Firmicutes	c__Clostridia	o__Peptostreptococcales-Tissierellales	f__Peptostreptococcales-Tissierellales	g__Anaerococcus	s__uncultured_bacterium	0.0326406	0.00424794	0	0	0	0	5.27546e-05	0	0	0.000310688	0	0	0	0	0	0.00013052	0	0	0	0	0	0	0.000251753	0	0.00021029	0	0.00012797	0	0.0314127	0.000143877
ASV_127	d__Bacteria	p__Desulfobacterota	c__Syntrophia	o__Syntrophales	f__Smithellaceae	g__Smithella	s__uncultured_bacterium	0.00268953	0.00424794	0	0	0	0	6.10843e-05	0	0	0.000379729	0	0	0	0	0	0.000246538	0	0.000169894	0.000324788	0.000592194	0	0	0.000269736	0	0.000294406	0	0.000213283	0	0.000137882	0
ASV_129	d__Bacteria	p__Deinococcota	c__Deinococci	o__Deinococcales	f__Trueperaceae	g__Truepera	s__uncultured_bacterium	0.0251776	0.00475243	0	0	0.000586166	0.000160042	0	0.00013048	0	0	0	0.000475135	9.66557e-05	5.64389e-05	0.000234782	0.000226733	0	0.00459805	0.000216206	0.000191769	0.000842773	0.00964191	0.000502122	0.00121518	0.00561267	0	0	0	0.000390475	0
ASV_130	d__Bacteria	p__Actinobacteriota	c__Actinobacteria	o__Corynebacteriales	f__Corynebacteriaceae	g__Corynebacterium		0.0496682	0.00575769	0	0	0	0.000217061	0	0.0194673	0.00566598	0.00985387	0	0	0	0	0.000344297	0	0	0	0.0138272	0.000292512	0	0	0	0	0	0	0	0	0	0
ASV_131	d__Bacteria	p__Proteobacteria	c__Gammaproteobacteria	o__Burkholderiales	f__Comamonadaceae	g__Hydrogenophaga		0.0125805	0.00575769	0.000348369	0.000323668	0	8.72956e-05	0.00212962	0.00228276	0.000328317	0.00117371	0.00189953	0.000760136	0.000257749	0.00322175	0	0.000181278	0.000216513	0	0	0	0	0	0	0	0	4.17955e-05	0	0	0	0
ASV_132	d__Bacteria	p__Actinobacteriota	c__Actinobacteria	o__Corynebacteriales	f__Corynebacteriaceae	g__Corynebacterium	s__uncultured_bacterium	0.0414746	0.00508565	0	0	0	0	4.16484e-05	0	0.000383037	0.00459127	0	0	0	3.99054e-05	0.000121517	0.00171002	9.02136e-05	0.00148974	0.00520888	0	0	0	0	0.000906433	0.0214178	0	0.000778484	0	0.00469566	0
ASV_133	d__Bacteria	p__Proteobacteria	c__Gammaproteobacteria	o__Burkholderiales	f__Comamonadaceae	g__Aquabacterium		0.0127853	0.00508565	0	0	0	0	0.00259573	0.00137326	0	0	0.00329597	0	0	0.00305802	0	0.00111022	0	0.000919679	0	0	0.00043239	0	0	0	0	0	0	0	0	0
ASV_134	d__Bacteria	p__Actinobacteriota	c__Actinobacteria	o__Frankiales	f__uncultured	g__uncultured		0.0269664	0.00508565	0	0	0	0.000101845	0	0	0.000328317	0	0	0	0	0	0.000426876	0.00100727	0.000180427	0.00248351	0.000404	0	0.00266204	0.0190224	0.000280028	0	0	6.96592e-05	0	0	0	0
ASV_135	d__Archaea	p__Nanoarchaeota	c__Nanoarchaeia	o__Woesearchaeales	f__SCGC_AAA011-D5	g__SCGC_AAA011-D5		0.0320213	0.00508565	0	0	0	0	1.94359e-05	0	0	0.000207125	0	0	0	0	0	6.526e-05	0	0	0	0	0	0	0.000161841	0	0.00022431	0	0.000138634	0	0.0312047	0
ASV_136	d__Bacteria	p__Cyanobacteria	c__Cyanobacteriia	o__Cyanobacteriales	f__Phormidiaceae	g__Tychonema_CCAP_1459-11B		0.0296053	0.00508565	0	0	0	0	2.4989e-05	0	0	0	0	0	0	0.000122683	0.000379824	0.0286831	0.000216513	0	0	0	0	0	0.000116885	0	0	0	0	0	6.12811e-05	0
ASV_138	d__Bacteria	p__Proteobacteria	c__Alphaproteobacteria	o__Paracaedibacterales	f__Paracaedibacteraceae			0.0270728	0.0052993	0	0	0	0.000160042	0.000131496	0.00013048	0.000465116	0.000159199	0	0.000121724	0.000128874	2.49409e-05	0.000234782	5.85624e-05	0	0.00299582	0.0004343	0	0	0.000117108	0.000146829	0.00165849	0.0147944	2.59215e-05	3.95313e-05	0	0.000645654	0.00459955
ASV_140	d__Bacteria	p__Actinobacteriota	c__Actinobacteria	o__Micrococcales	f__Intrasporangiaceae			0.0236607	0.0059261	0	0	0	0	0	0	0	0	0	0	0	0	0.000121517	0	0	0.0029601	0	0	0	0.00401421	0	0	0	0.00533536	0	0.00028168	0.00201313	0.00893474
ASV_141	d__Bacteria	p__Proteobacteria	c__Gammaproteobacteria	o__Burkholderiales	f__Comamonadaceae	g__Acidovorax		0.0125119	0.0059261	0	0	0	0	0.00347189	0.00167942	0	0	0.00262689	0	0	0.00272951	0	0.000650043	0	0.000953189	0	0	0.000400943	0	0	0	0	0	0	0	0	0
ASV_142	d__Archaea	p__Crenarchaeota	c__Bathyarchaeia	o__Bathyarchaeia	f__Bathyarchaeia	g__Bathyarchaeia	s__uncultured_archaeon	0.00130113	0.0059261	0	0	8.01475e-05	0	0	1.35074e-05	0	0	0	0.000324596	0.000279631	0	0	0	0.000360855	4.12182e-05	0	0	0	0	0	0.000175249	0	2.59215e-05	0	0	0	0
ASV_143	d__Bacteria	p__Proteobacteria	c__Gammaproteobacteria	o__Burkholderiales	f__Oxalobacteraceae	g__Janthinobacterium		0.012426	0.0059261	0	0.000351617	0.0007034	0	0.00437743	0.000576317	0	0.000255447	0.000745272	0.00123331	0.000241639	0	0	0.000259357	0	0.000985663	0.000504401	0.00159459	0	0	0.000604646	0	0	8.35911e-05	0.000260907	0	0	0
ASV_144	d__Bacteria	p__Actinobacteriota	c__Actinobacteria	o__Corynebacteriales	f__Corynebacteriaceae	g__Corynebacterium		0.04652	0.00557448	0	0	0	0	0	0.000521921	0	0	0	0	0	0	0	0	0	0	0.00255708	0.00776743	0.011174	0.0140042	0.000497118	0	0	0	0	0.00999817	0	0
ASV_145	d__Bacteria	p__Actinobacteriota	c__Actinobacteria	o__Corynebacteriales	f__Corynebacteriaceae	g__Turicella	s__uncultured_bacterium	0.0351534	0.00557448	0	0	0	0	0	0	0	0	0	0	0.0158596	0	0	0	0	0.00457062	0.00688261	0.000386777	0	0.00663605	2.69736e-05	5.84163e-05	0.000732318	0	0	0	0	0
ASV_146	d__Bacteria	p__Proteobacteria	c__Alphaproteobacteria	o__Caulobacterales	f__Caulobacteraceae	g__Brevundimonas		0.0152058	0.00557448	0.00180073	0.00142356	0	0	0.000233231	0	0	0.000621375	0.000340825	0	0.000193311	0	0	0.000174027	0	8.65054e-05	0.000144877	0.000245089	0	0	0.00022478	0	0.000280387	0	0.000117306	0	0.0120965	0.000447614
ASV_147	d__Bacteria	p__Actinobacteriota	c__Actinobacteria	o__Corynebacteriales	f__Corynebacteriaceae	g__Corynebacterium		0.0123373	0.0023502	0	0	0	0	0	0.000373706	0	0.00106687	0	0.000263734	0	0	0	0	0.000541282	0.00260162	0.00173314	0.000552522	0.0052044	0	0	0	0	0	0	0	0	0
ASV_148	d__Bacteria	p__Proteobacteria	c__Gammaproteobacteria	o__Burkholderiales	f__Comamonadaceae	g__Hydrogenophaga		0.00983638	0.0023502	0	0	0	0	0.00108563	0.00173796	0	0	0.00198588	0.00087108	0	0.00290472	0	0	0	0.000129543	0.0002424	0	0.000597484	0	0	0	0	0	0	0.00028168	0	0
ASV_149	d__Bacteria	p__Proteobacteria	c__Gammaproteobacteria	o__Burkholderiales	f__Oxalobacteraceae	g__Massilia	s__uncultured_bacterium	0.0224597	0.00238448	0	0.000504495	0	0	0.000116615	0	0	0	0.000209644	0	0	9.97636e-05	0.000182275	0.0101167	0.00146052	0	0	0.000568773	0	0	0	0.00185874	0.00677194	0	0	0.00031689	0.000498914	0.000258978
ASV_150	d__Bacteria	p__Proteobacteria	c__Alphaproteobacteria	o__Rhizobiales	f__Beijerinckiaceae	g__Methylobacterium-Methylorubrum		0.0399317	0.00187998	0.000592492	0.000412768	0	0	0	0	0.00130929	0	0	0.0187657	0.000247413	0.00013625	0.000345081	0.0184574	0.000398067	8.83247e-05	0	0	5.50314e-05	0	4.49559e-05	0	8.41161e-05	0	0	0	0	0
ASV_151	d__Bacteria	p__Chloroflexi	c__JG30-KF-CM66	o__JG30-KF-CM66	f__JG30-KF-CM66	g__JG30-KF-CM66	s__uncultured_bacterium	0.0279087	0.00087472	0	0	0	0	2.77656e-05	0	0	0.000276167	0	0	0	0	0	8.70133e-05	0	0	0	0	0	0	0	0	0.000127904	0	0	0	0.0270797	0.000310133
ASV_152	d__Bacteria	p__Firmicutes	c__Bacilli	o__Lactobacillales	f__Aerococcaceae	g__Aerococcus	s__uncultured_bacterium	0.0181881	0.00087472	0	0	0	0.0102833	3.94488e-05	0	0	0	8.17255e-05	0.000619105	0.000418413	0	0	0	0.0007452	0	0	0.00102905	0.000418797	0.000366249	4.89428e-05	0.000935641	0.000181295	0	0	0.00228575	0	0.000735206
ASV_153	d__Bacteria	p__Actinobacteriota	c__Actinobacteria	o__Pseudonocardiales	f__Pseudonocardiaceae			0.0389223	0.00087472	0	0	0	0	4.16484e-05	0	0	0	0	0	0	0	0	0.000137771	0	0	0	0	0	0	0.000368639	0	0	0.000262228	0.0378832	0.000228865	0	0
ASV_154	d__Bacteria	p__Proteobacteria	c__Gammaproteobacteria	o__Burkholderiales	f__Oxalobacteraceae	g__Massilia	s__uncultured_bacterium	0.0165445	0.00087472	0	0	0.000747955	0.000232788	0.00825563	0	0	0.00040571	0	0	0.000271362	7.98108e-05	0	0	0	0.000147208	8.07999e-05	0.000169677	0.000102201	0	0.000276692	0.000175249	0.00433993	0.000103686	0.000110688	0	0.00104508	0
ASV_155	d__Bacteria	p__Proteobacteria	c__Gammaproteobacteria	o__Gammaproteobacteria_Incertae_Sedis	f__Unknown_Family	g__Candidatus_Berkiella	s__uncultured_bacterium	0.0480367	0.00101554	0	0	0.000220406	0.000372383	0	7.20396e-05	0.000748838	0.000114121	0.0030069	0.0251968	0.000945885	7.98108e-05	0.000426876	0	0.000216513	0.000212931	0.012507	0.000594796	0.00214347	0.000198284	0	0.000131437	0	0.000103686	0	0.000550358	0	0.000194233
ASV_156	d__Bacteria	p__Planctomycetota	c__Planctomycetes	o__Planctomycetales	f__Rubinisphaeraceae	g__SH-PL14	s__uncultured_bacterium	0.0197706	0.00101554	0	0	8.01475e-05	0	0	0.000304454	0	0	0	0.0125515	0.00021106	2.63382e-05	0	0	0	0.00548643	0	0	0.00038217	0	0	0.000565344	0	0.000109513	0	0	5.36209e-05	0
ASV_157	d__Bacteria	p__Chloroflexi	c__Dehalococcoidia	o__GIF9	f__AB-539-J10	g__AB-539-J10	s__uncultured_bacterium	0.0284205	0.00101554	0.000167784	4.58631e-05	0	0	0	0	0.000136799	0	0	0	0.0244861	0	0.00017075	0.00251217	0	0	0.0001616	0	0	7.80721e-05	0.000783085	0	0	0	0	0	9.19216e-05	0
ASV_158	d__Bacteria	p__Proteobacteria	c__Gammaproteobacteria	o__Xanthomonadales	f__Xanthomonadaceae	g__Stenotrophomonas		0.0107445	0.000801895	0	0.000626796	0.000781438	0	0	0	9.22033e-05	0	0.000349406	0.000588331	0	0.000179574	0.00011139	0	0.00079388	0.000223756	0	0.000910036	0.000243711	0	0	0.000511143	0	0.00526798	8.53133e-05	0.000404915	0	0.000201427
ASV_159	d__Bacteria	p__Actinobacteriota	c__Actinobacteria	o__Micrococcales	f__Microbacteriaceae	g__Clavibacter		0.0314419	0.000175099	0	0	0	0	0.000460236	0	0	0.000345605	0	0	0	0	0	0.000181543	0	0	0	0	0	0	0.000489428	0.00378324	0.0249493	0	0	0	0.00123261	0
ASV_160	d__Bacteria	p__Proteobacteria	c__Gammaproteobacteria	o__Burkholderiales	f__Oxalobacteraceae	g__Massilia		0.015558	0.000175099	0	0	0.00087925	0.000145493	0.00127444	0.00118415	0.000547196	0.000932063	0.00124515	0	0	0.00390489	0.000650747	0.0024821	0.00147348	0	0.0001717	0	0.000667319	0	0	0	0	0	0	0	0	0
ASV_161	d__Bacteria	p__Bdellovibrionota	c__Bdellovibrionia	o__Bdellovibrionales	f__Bdellovibrionaceae	g__Bdellovibrio	s__uncultured_bacterium	0.00256422	0.000175099	0	0	0	0.000305535	0	0	0.000410397	0	0	0	0.000322186	0	0.000490908	0	0	0	0.0004141	0	0	0.000240722	0	0	0	0	0	0	0.000322827	5.75506e-05
ASV_162	d__Bacteria	p__Actinobacteriota	c__Actinobacteria	o__Streptomycetales	f__Streptomycetaceae	g__Streptomyces		0.0355924	0.000175099	0	0	0.0003517	0	0	0.0127871	0	0	9.98303e-05	0	6.44371e-05	2.25756e-05	0.000149407	0	0.000471365	0.00305691	7.06999e-05	0	0.000102201	0.0161083	0.000161841	0	0	0	0.00191332	0	0	0.000232759
ASV_163	d__Bacteria	p__Proteobacteria	c__Gammaproteobacteria	o__Burkholderiales	f__Gallionellaceae	g__Gallionella		0.0273914	0.000175099	0	0	0	0	4.72015e-05	0	0	0.000690417	0	0	0	0.000203633	0.00136086	0.023131	0.00133854	0	0	0	0	0	0.000170833	0	0.000182252	0	0.000266604	0	0	0
ASV_164	d__Bacteria	p__Firmicutes	c__Negativicutes	o__Veillonellales-Selenomonadales	f__Veillonellaceae	g__Veillonella	s__uncultured_bacterium	0.0332116	0.000175099	0	0	0	0	0	0.000493466	0.0189724	0.000704218	4.08991e-05	0	0.000361816	0.000114728	0.00425604	0.00500123	0	0.00180182	0.000127854	0	0	0.000626192	0.000130514	0.000102229	0	6.04835e-05	9.48752e-05	8.80251e-05	0.000234783	0
ASV_165	d__Bacteria	p__Proteobacteria	c__Gammaproteobacteria	o__Burkholderiales	f__Oxalobacteraceae			0.00743626	0.000175099	0	0	0	0	0.000344293	0.000657362	0	0	0.00129968	0.00178107	0.000628262	0.00145989	0	0	0	0.0001085	0	0.000276261	0	0	0.000296709	0	0	0	0.000392737	0	0.000191503	0
ASV_166	d__Bacteria	p__Proteobacteria	c__Gammaproteobacteria	o__Burkholderiales	f__Comamonadaceae			0.0429012	0.000175099	0	0	0	0	4.16484e-05	0	0	0.000345209	0	0	0	0	0	0.000108767	0	0	0	0	0	0	0.000125877	0.00144678	0.0351325	0	0	0	0.000722351	0.00497813
ASV_168	d__Bacteria	p__Proteobacteria	c__Gammaproteobacteria	o__Xanthomonadales	f__Xanthomonadaceae	g__Stenotrophomonas		0.0201287	0.000175099	3.42764e-05	0	0	0	0	0	0	0	0.000190862	0.000344884	0	0.000134681	0	5.80088e-05	0.000864168	0.000122787	0	0.000282795	0.000251572	0.000301487	0.00444416	0.000675904	0	8.6405e-05	0	0.00283441	0.00588787	0.00364869
ASV_170	d__Bacteria	p__Proteobacteria	c__Gammaproteobacteria	o__Pseudomonadales	f__Moraxellaceae	g__Psychrobacter		0.0193037	0.000140823	0	0	0.00150997	0	0	0.00122385	0	0	0	0.000953209	0	0.000163814	0	0	0	0.00020375	0	0	0.0122123	7.80721e-05	0.000125877	0.00165222	0	0.000372275	0	0	0.000527065	0.000281358
ASV_171	d__Bacteria	p__Actinobacteriota	c__Actinobacteria	o__Corynebacteriales	f__Corynebacteriaceae	g__Corynebacterium		0.0341709	0.000140823	0	0	0.00123095	0	0	0.000826374	0	0	0	0	0	0	0	0	0	0.0020458	0.00752377	0.0138822	0.00182401	0	0	0	0	0	0	0	0.00584023	0.000997539
ASV_172	d__Bacteria	p__Patescibacteria	c__Parcubacteria	o__Candidatus_Azambacteria	f__Candidatus_Azambacteria	g__Candidatus_Azambacteria		0.0274119	0.000140823	0	0	0	0	0	0	0	0	2.7266e-05	0	0.000150757	0	0	0	0.000196402	0.00103634	0.00538912	0.000509667	0	0.000195988	0.000130514	0.000813614	0.00353788	0	0	0	0.0114342	0.00399016
ASV_173	d__Bacteria	p__Firmicutes	c__Bacilli	o__Lactobacillales	f__Leuconostocaceae	g__Leuconostoc		0.0141898	0.000140823	0	0	0	0	0.000211018	0	0	0.000655896	0	0	0	0	0	0.00019578	0	1.8617e-05	6.8812e-05	0.000113755	0	0	0.000260744	0	0.000308426	0	0.000234612	0	0.0121221	0
ASV_174	d__Bacteria	p__Proteobacteria	c__Gammaproteobacteria	o__Burkholderiales	f__Comamonadaceae	g__Delftia		0.0208577	0.000140823	0	0	0	0	0	0	0	0	0.000189678	0	0	4.13885e-05	0	0	0.000469111	0	0	0.000552522	0.00477304	0.00679878	0.000575436	0	0	0.00385366	0	0	0	0.00360411
ASV_175	d__Bacteria	p__Bacteroidota	c__Bacteroidia	o__Cytophagales	f__Cyclobacteriaceae	g__Algoriphagus		0.0315048	0.000140823	0.000140823	0	0.000615167	0.0166762	0.00173939	0.000143988	0.000109439	0.000444303	0.00293001	0.000118784	0.000177202	3.50031e-05	0.00020113	0.0075339	0.000190012	0	9.08999e-05	9.75039e-05	0	3.90361e-05	5.39471e-05	0	0.000182252	0	9.59775e-05	0	3.06405e-05	0
ASV_176	d__Bacteria	p__Proteobacteria	c__Gammaproteobacteria	o__Pseudomonadales	f__Pseudomonadaceae	g__Pseudomonas		0.0159256	4.40697e-05	0	0	0.000400737	0.00377143	0.000483121	0.000580819	0	0	0.000313559	0.00105494	0.000941322	0.00658439	0.000277469	0.000224784	0.000732421	0	0	0	0.000133648	0	0.000134868	0.000292082	0	0	0	0	0	0
ASV_177	d__Bacteria	p__Proteobacteria	c__Gammaproteobacteria	o__Pseudomonadales	f__Moraxellaceae	g__Acinetobacter		0.0188787	4.40697e-05	0	0	0.00152403	0	0.000108286	0.000782881	0	0.00110467	0	0.00122743	0	0	0	0.000253789	0	0.000629612	0.00353283	0	0	0	0.00600244	0.00261913	0	0.000334364	0	0	0.000536209	0.000223009
ASV_178	d__Bacteria	p__Proteobacteria	c__Gammaproteobacteria	o__Xanthomonadales	f__Xanthomonadaceae	g__Luteimonas		0.0366549	4.40697e-05	0	0	0	0	0.000223543	0	0.000110644	0	0	0	0.000241211	0	0	0.000122981	0.000306726	0	4.73534e-05	0.000276261	0.000418797	0.0170594	0.000581008	0.000990921	0.00501002	0	0.000110688	0	0.00252272	0.0086326
ASV_179	d__Bacteria	p__Bacteroidota	c__Bacteroidia	o__Flavobacteriales	f__Weeksellaceae	g__Chryseobacterium		0.0238296	0.00176749	0	0	0.000420774	0	0	9.00495e-05	0	0	0.000190862	0.000923414	0	8.4799e-05	0	0	0	0.0140006	0.000292601	0.000378333	0.00159675	0.00254814	0.0026524	0.000408914	0	0.000241934	0	0	0	0
ASV_180	d__Bacteria	p__Actinobacteriota	c__Actinobacteria	o__Propionibacteriales	f__Nocardioidaceae	g__Nocardioides		0.00323464	0.00176749	0	0	0	0.000261887	0	0	0.00112175	0	0	0	0.000354404	0	0	0	0	0	0.000706999	0	0	0.000273252	0	0	0	0.000120967	0.000262376	0	0	0.000133005
ASV_181	d__Archaea	p__Hadarchaeota	c__Hadarchaeia	o__Hadarchaeia	f__Hadarchaeales	g__Hadarchaeales	s__uncultured_archaeon	0.000391887	0.00176749	0	0	0	0	0	0	0	0	0	0.000279122	0.000112765	0	0	0	0	0	0	0	0	0	0	0	0	0	0	0	0	0
ASV_182	d__Bacteria	p__Patescibacteria	c__Parcubacteria	o__Candidatus_Azambacteria	f__Candidatus_Azambacteria	g__Candidatus_Azambacteria		0.0279641	0.00176749	0	0	0	0	0	0	0	0	0	0	0	0	0	0	0.000162385	0	0	0.00912086	0	0	0	0.000591416	0	0.000915893	0	0	0.000451756	0.0167218
ASV_183	d__Bacteria	p__Proteobacteria	c__Gammaproteobacteria	o__Xanthomonadales	f__Rhodanobacteraceae	g__uncultured		0.0199158	0.00176749	0	0	0	0	1.94359e-05	0	0	0	0	0	0.000422119	0	0.000141769	0	3.60855e-05	0.00207818	0.00500678	0.000703346	0	0	0	0	0	0	0.00147165	0.0003521	0.000534725	0.00914959
ASV_184	d__Bacteria	p__Bacteroidota	c__Bacteroidia	o__Sphingobacteriales	f__Sphingobacteriaceae	g__Sphingobacterium		0.00738411	0.00176749	0	0	0.000293083	0	2.22125e-05	0.00013048	0	0.000172604	6.98812e-05	0.000197973	0	5.26763e-05	0	6.526e-05	0.000108256	9.30849e-05	0	0.000308762	0.000444879	0	0.00112272	0.00228118	0.00135763	6.96592e-05	3.19925e-05	0	0.000446682	0.000115101
ASV_185	d__Bacteria	p__Fibrobacterota	c__Fibrobacteria	o__Fibrobacterales	f__Fibrobacteraceae	g__uncultured	s__metagenome	0.0171942	0.00176749	0	0	0.0003517	0.000271326	0	0.000173974	0.000202847	0	0	0	0.000391968	0	8.1011e-05	5.27062e-05	0	0.00241822	0.00956377	0.000456984	0	0	0	0	3.93719e-05	9.89299e-05	0.00309135	0	0	0
ASV_186	d__Bacteria	p__Proteobacteria	c__Gammaproteobacteria	o__Burkholderiales	f__Rhodocyclaceae	g__Uliginosibacterium		0.00323272	0.00180608	0	0	8.01475e-05	0	0	3.60198e-05	0	0	0.000149745	0.000466607	0	8.4799e-05	0	0	0.000378897	0.000200203	0	0.00050377	0.000133648	0	0	0.000189853	0	0.000112327	0	0.000193655	0.000459417	0.000243631
ASV_187	d__Bacteria	p__Bacteroidota	c__Bacteroidia	o__Sphingobacteriales	f__env.OPS_17	g__env.OPS_17	s__uncultured_bacterium	0.0303218	0.00180608	0	0	0.00052755	0.00010853	0.000105197	0.000347947	7.37626e-05	4.50789e-05	0	0	0.000180908	0	4.05055e-05	8.19874e-05	0	0.0020851	0.00317268	0.00024376	0.00232594	0.000150743	0.0201981	0.000480856	0	3.4562e-05	0.000118594	0	0	0
ASV_188	d__Bacteria	p__Deinococcota	c__Deinococci	o__Deinococcales	f__Deinococcaceae	g__Deinococcus		0.0476066	0.00180608	0	0	0.000410317	0.000217061	0	0.00050094	0.0293349	0.00043252	0.000142518	0.0106113	0.000391968	0	7.08846e-05	0.000478573	0	3.7234e-05	4.73534e-05	0.000113755	0.00022244	0.00112247	0	0	0	6.96592e-05	0	0	0	0.00340268
ASV_189	d__Bacteria	p__Proteobacteria	c__Gammaproteobacteria	o__Burkholderiales	f__Sutterellaceae	g__AAP99	s__uncultured_bacterium	0.0218007	0.00180608	0	0	0.000354688	0.000217061	0	2.25124e-05	0	0.000105184	0	0	0	6.86948e-05	8.1011e-05	0	0	0.00171077	0.000160671	0.000146256	0.000220126	0.0121676	0.00037291	0	0	0.000181451	0.00558291	0.000158445	0.000117392	0.000133005
ASV_190	d__Bacteria	p__Actinobacteriota	c__Actinobacteria	o__Frankiales	f__Nakamurellaceae	g__Nakamurella		0.0411601	0.00226804	0	0	0	0	3.60953e-05	0	0	0.0008285	0	0	0	0	0	0	0	0	0	0	0	0	0.000179824	0.00202565	0.0379138	0	0	0	0.000176183	0
ASV_191	d__Bacteria	p__Actinobacteriota	c__Actinobacteria	o__Corynebacteriales	f__Corynebacteriaceae	g__Corynebacterium	s__uncultured_bacterium	0.0106153	0.0023139	0	0	0	0	0	0	0.000165966	0	0	0	0	0	0	0.000691036	0	5.88831e-05	0.00919216	0.000211258	0	0.000188079	0	0	0	0	0	0	0	0.000107907
ASV_192	d__Bacteria	p__Bacteroidota	c__Bacteroidia	o__Bacteroidales	f__Prevotellaceae	g__Alloprevotella	s__uncultured_bacterium	0.0355358	0.0023139	0	0	0	8.13979e-05	0	0	0.00614763	0	0	0.00198815	0.000180908	0	2.02528e-05	0	0	0.000524999	7.10301e-05	0	0	0.000160353	0	0	0	6.96592e-05	7.70396e-05	0.00041972	0.0115631	0.0142316
ASV_193	d__Bacteria	p__Firmicutes	c__Clostridia	o__Peptostreptococcales-Tissierellales	f__Peptostreptococcales-Tissierellales	g__Anaerococcus	s__uncultured_bacterium	0.032493	0.0023139	0	0	0.000140258	0	1.66594e-05	3.60198e-05	0.00840006	0.000276167	0.000200773	0	0	0	0	0.000108767	0.000144342	0.00313033	0.00197083	0.000325013	0	0	0.000116885	0	0	0.000237713	0.0171741	0.000123235	9.19216e-05	0
ASV_194	d__Bacteria	p__Proteobacteria	c__Gammaproteobacteria	o__Pasteurellales	f__Pasteurellaceae	g__Haemophilus	s__uncultured_bacterium	0.030096	0.0023139	4.40697e-05	0	0	0.000261887	0	0.000652859	0.000547798	0.000172604	5.98982e-05	0.000277162	0.000386623	0	0.000469564	6.526e-05	0	0.000210851	0.0152068	0.000305523	0.000188495	0.00016265	0	0.00042244	0	0.000158006	0.00373724	0.00681034	0	0
ASV_195	d__Bacteria	p__Bacteroidota	c__Bacteroidia	o__Bacteroidales	f__Prevotellaceae	g__Prevotella	s__uncultured_bacterium	0.00278932	0.00226983	0	0	0	0	0	0	0	0	0	0	0	0	0	0	0.000314243	0	0	0.000584443	0.000301056	0.000136626	0.0002284	0	0	0	0	0.000825537	0	0.000399016
ASV_196	d__Bacteria	p__Firmicutes	c__Bacilli	o__Lactobacillales	f__Lactobacillaceae	g__Lactobacillus		0.0290351	0.00226983	0	0	0	0.000247337	0	0	0.000328317	0	0	0	0.000289967	0	0.000533595	0	0	0	0.0003131	0	0.000308918	0.0174947	4.89428e-05	0	0	2.78637e-05	0	0.0094424	0	0
ASV_197	d__Bacteria	p__Campilobacterota	c__Campylobacteria	o__Campylobacterales	f__Sulfurimonadaceae	g__Sulfuricurvum		0.0119261	0.00226983	0.000891484	0.00083194	0.000220406	0	0.0024878	0.00151283	0	0.000990943	0.00356061	0.000547756	0	0.000931555	0	0.000145022	0.000785608	0.000111878	0	0.000395913	8.6478e-05	0	0	0	0	0	0.000149298	0	0	0
ASV_200	d__Bacteria	p__Cyanobacteria	c__Cyanobacteriia	o__Cyanobacteriales	f__Chroococcidiopsaceae	g__Aliterella		0.0259547	0.000546409	0	0	0.000293083	0	0.000794096	0	0	0.00655896	0	0.000118784	0	0	0	0.0025959	0	0	0	0	0	0	0.00320086	0	0.0073181	0	0.00257006	0	0.00250486	0
ASV_201	d__Bacteria	p__Proteobacteria	c__Gammaproteobacteria	o__Burkholderiales	f__Oxalobacteraceae	g__Noviherbaspirillum	s__uncultured_bacterium	0.0306218	0.000546409	0	0	0.000520959	0	0.000297092	0.00194777	0	0.000135237	0.00141147	0.000689767	0	2.63382e-05	0	0	0.000487154	0	0	0.000373765	0.000188679	0	0	0.0122653	0.000157488	0.0002065	0.000117306	0.0116897	0.000107242	0
ASV_202	d__Bacteria	p__Firmicutes	c__Bacilli	o__Staphylococcales	f__Staphylococcaceae	g__Staphylococcus		0	0.000546409	0	0	0	0	0	0	0	0	0	0	0	0	0	0	0	0	0	0	0	0	0	0	0	0	0	0	0	0
ASV_203	d__Bacteria	p__Campilobacterota	c__Campylobacteria	o__Campylobacterales	f__Sulfurimonadaceae	g__Sulfuricurvum	s__uncultured_bacterium	0.00855819	0.000546409	0	0	0	0	0	0	0	0.00178654	0	0	0	0	0	0.00385926	0.00203883	8.83247e-05	0	0.000588955	0	0	0	0	0.000196271	0	0	0	0	0
ASV_204	d__Bacteria	p__Acidobacteriota	c__Subgroup_22	o__Subgroup_22	f__Subgroup_22	g__Subgroup_22	s__uncultured_bacterium	0.0321253	0.0144761	0	0	0	0	2.4989e-05	0	0	0.000138083	0	0	0	9.97636e-06	0	8.70133e-05	0	0	0	0	0	0	0	0	5.60774e-05	8.6405e-05	0.0306153	0.00101549	9.19216e-05	0
ASV_205	d__Bacteria	p__Firmicutes	c__Bacilli	o__Lactobacillales	f__Lactobacillaceae	g__Lactobacillus		0.0303561	0.0145838	0	0	0	0.000298459	0	0	0.000331932	0	0	0	0	9.37215e-05	0.028593	0.00017179	0.000325896	0	0.000113648	0	0	0.000427609	0	0	0	0	0	0	0	0
ASV_206	d__Bacteria	p__Caldatribacteriota	c__JS1	o__JS1	f__JS1	g__JS1	s__uncultured_bacterium	0.0123928	0.0145838	3.85832e-05	0	0	0	1.38828e-05	0	0	0.000345209	2.7266e-05	0.000744749	0	0	0.000128063	0.00973293	0.000645402	1.76649e-05	0	0.000226236	0	0	0.000170833	0	0	0	0.000138634	0	6.89412e-05	0.000133005
ASV_208	d__Bacteria	p__Actinobacteriota	c__Actinobacteria	o__Frankiales	f__Geodermatophilaceae			0.0142058	0.0145453	0	0	0	0	0	0	0	9.01578e-05	0	0	0	0	0.000362845	0	0	0	0.0001919	0.00026001	0	0.00296674	0.000505743	0.00104934	0.00786802	0.000268926	0	0.000642084	0	0
ASV_209	d__Bacteria	p__Firmicutes	c__Bacilli	o__Staphylococcales	f__Staphylococcaceae	g__Staphylococcus		0.0101122	0.0145453	0	0	0	0	0	0	0	0	0	0	0	0	0	0	0	0.0015177	0.00330258	0	0.0028066	0.0011906	0.00129473	0	0	0	0	0	0	0
ASV_210	d__Bacteria	p__Bacteroidota	c__Bacteroidia	o__Cytophagales	f__Hymenobacteraceae	g__Hymenobacter		0.0215157	0.0145453	0	0	0	8.72956e-05	7.88975e-05	0	0.000218878	7.51315e-05	0	0	8.05464e-05	0	4.26876e-05	0	0	0	9.08999e-05	0	0.000280153	0.0108585	8.15714e-05	0.000964849	0.00859305	0	6.32501e-05	0	0	0
ASV_211	d__Bacteria	p__Proteobacteria	c__Gammaproteobacteria	o__Burkholderiales	f__Hydrogenophilaceae	g__Thiobacillus		0.00893951	0.0145453	0.000293798	0.000168165	0	0	0.000621949	0	0	0.000379729	5.45321e-05	0.000101436	0.000128874	0.00596295	0.000302393	0.000381796	0.00019847	0	1.89414e-05	0	0	7.12682e-05	0.000107894	0	0.000308426	0	0.000170627	0	0.000130222	0
ASV_213	d__Bacteria	p__BHI80-139	c__BHI80-139	o__BHI80-139	f__BHI80-139	g__BHI80-139	s__uncultured_bacterium	0.00279573	0.0140833	0	4.58631e-05	0	0	0	0	0	0	7.98642e-05	0.000798751	0.000671599	0	0	2.62147e-05	0.000162385	0	0	0.00052135	0	0	1.79824e-05	0	0	0	0	0.000458631	2.29804e-05	3.59692e-05
ASV_214	d__Bacteria	p__Firmicutes	c__Bacilli	o__Bacillales	f__Bacillaceae	g__Bacillus		0.0594161	0.0140374	0	0	0	0	0	0	0	0	0	0	0	0.000114728	0.0592077	9.36999e-05	0	0	0	0	0	0	0	0	0	0	0	0	0	0
ASV_215	d__Bacteria	p__Firmicutes	c__Bacilli	o__Lactobacillales	f__Carnobacteriaceae	g__Granulicatella	s__uncultured_bacterium	0.00200963	0.0140374	0	0	0.000260479	0	0	5.40297e-05	0	0	0	0.000385458	0	6.48463e-05	0	0	0	0.000618273	0	0	0.000141509	0	0	0.000204457	0	0.000146889	0	0	6.89412e-05	6.47445e-05
ASV_216	d__Bacteria	p__Bacteroidota	c__Bacteroidia	o__Flavobacteriales	f__Flavobacteriaceae	g__Flavobacterium		0.00790682	0.0140374	0	0	0.000820633	0	0.00311252	0.000720396	0	0	0.00244055	0	0	0.000812721	0	0	0	0	0	0	0	0	0	0	0	0	0	0	0	0
ASV_217	d__Bacteria	p__Proteobacteria	c__Gammaproteobacteria	o__Burkholderiales	f__Burkholderiaceae	g__Burkholderia-Caballeronia-Paraburkholderia		0.00387694	0.0140374	0	0	0	0.000232788	1.66594e-05	0	0.000420521	0.000172604	0	0	0.000306076	0	0.000661658	3.62555e-05	0	0	0.0003434	0	0	0.000188674	8.99119e-05	0	0	0.00017281	0.000220087	0.00101549	0	0
ASV_218	d__Bacteria	p__Proteobacteria	c__Gammaproteobacteria	o__Pseudomonadales	f__Moraxellaceae	g__Acinetobacter		0.00750357	0.0140374	0	0	0	0	0	0	0	0	0	0	0	0	0	0.000163975	0	4.84042e-05	0.0001616	0.000357514	0	0	0.00659097	0	0.000181111	0	0	0	0	0
ASV_219	d__Bacteria	p__Actinobacteriota	c__Actinobacteria	o__Corynebacteriales	f__Corynebacteriaceae	g__Corynebacterium	s__uncultured_bacterium	0.0142186	0.0140374	0	0	0	0	0	0	0	0	0	0	0	0	0	0	0.00176762	0.000485776	0.00105784	0	0.00596698	0.0008653	0	0	0	0	0.00356183	0	0.000513229	0
ASV_220	d__Bacteria	p__Proteobacteria	c__Gammaproteobacteria	o__Burkholderiales	f__Comamonadaceae			0.0164445	0.0140374	0	0	0	0	0.000849627	0.00153534	0	0	0.00150418	0	0	0	0	0	0	0	0	0	0	0	0	0	0	0	0	0	0.00640387	0.00615149
ASV_221	d__Bacteria	p__Proteobacteria	c__Gammaproteobacteria	o__Alteromonadales	f__Alteromonadaceae	g__Rheinheimera		0.0235762	0.0140374	0	0	0.000888213	0.000788414	0.00167993	0	0	0.000345209	0.000109064	0	0.000112765	0	0.000725689	0.000101515	0	0.000199942	0.0178476	0.000464791	0	0.000169156	0.000143859	0	0	0	0	0	0	0
ASV_222	d__Bacteria	p__Proteobacteria	c__Gammaproteobacteria	o__Burkholderiales	f__Methylophilaceae	g__Methylophilus	s__uncultured_bacterium	0.0224561	0.0140374	0	0	0	0	0	0	0	0	0	0	0	6.48463e-05	7.08846e-05	0	0	0.00281844	7.10301e-05	0	0.00125103	0.00917647	0	0	0	0.0090034	0	0	0	0
ASV_223	d__Bacteria	p__Chloroflexi	c__KD4-96	o__KD4-96	f__KD4-96	g__KD4-96		0.0201985	0.0140374	0	0	0	0	2.4989e-05	0	0	0	0	0	0	7.36829e-05	0.000328101	0.0194017	0.00019847	0	0	0	0	0	5.39471e-05	0	0	0	6.3985e-05	0	5.36209e-05	0
ASV_224	d__Bacteria	p__Proteobacteria	c__Gammaproteobacteria	o__Burkholderiales	f__Oxalobacteraceae			0.00651814	0.0140374	0.0119254	0.00200431	0.00032059	0.000218239	0.00304418	0.000715894	0.000328317	0	0.00114972	0	0.000177202	2.25756e-05	0	0.000123269	0	0	0	0.000263942	0	0	0	0	0.000154213	0	0	0	0	0
ASV_225	d__Bacteria	p__Patescibacteria	c__Parcubacteria	o__GWA2-38-13b	f__GWA2-38-13b	g__GWA2-38-13b		0.00331613	0.000107726	0.000107726	0	0	0	0	0	0	0	0.000207855	0.000459747	0.000180908	0	0	0	0.000684682	0	0	0.000594159	0	0	0	0	0	0	0	0.000888554	0	0.000300222
ASV_226	d__Bacteria	p__Firmicutes	c__Bacilli	o__Lactobacillales	f__Enterococcaceae	g__Enterococcus		0.023161	0	0	0	0	7.27463e-05	0	0	0	0.000135237	0	0.00022316	0	8.4799e-05	0	0	0	0.00778435	0.0003333	0.000146256	0.000196541	0	0.000163143	0.000146041	0	0.000250575	0.00580228	0.00758776	0.000234783	0
ASV_227	d__Bacteria	p__Firmicutes	c__Clostridia	o__Oscillospirales	f__Ethanoligenenaceae			0.020171	0	0	0	0	0	2.22125e-05	0	0	0.000207125	0	4.05745e-05	6.44371e-05	2.49409e-05	0	4.35066e-05	9.02136e-05	0.00189604	9.08999e-05	5.6559e-05	0	3.25301e-05	0	0	7.00967e-05	0	0	0	0.0174599	7.19383e-05
ASV_228	d__Bacteria	p__Proteobacteria	c__Gammaproteobacteria	o__Burkholderiales	f__Comamonadaceae	g__Hydrogenophaga		0.010356	0	0	0	0	0	0.00573037	0.00188654	0	0	0.00273905	0	0	0	0	0	0	0	0	0	0	0	0	0	0	0	0	0	0	0
ASV_229	d__Bacteria	p__Actinobacteriota	c__Actinobacteria	o__Corynebacteriales	f__Corynebacteriaceae	g__Corynebacterium	s__uncultured_bacterium	0.0475352	0	0	0	0	0	0	0	0	0.000966584	0	0	0	0	0	0	0	0	0.00130695	0	0	0	0.000359648	0.00032129	0.0295528	0	0	0.011741	0.00328696	0
ASV_230	d__Bacteria	p__Actinobacteriota	c__Actinobacteria	o__Actinomycetales	f__Actinomycetaceae	g__Actinomyces		0.012606	0	0	0	0	0	0	0	0	0	0	0	0	0	0	0	0	0.000689956	0.0117698	0.000146256	0	0	0	0	0	0	0	0	0	0
ASV_231	d__Bacteria	p__Gemmatimonadota	c__PAUC43f_marine_benthic_group	o__PAUC43f_marine_benthic_group	f__PAUC43f_marine_benthic_group	g__PAUC43f_marine_benthic_group	s__uncultured_bacterium	0.0344754	0	0	0	0	0	0	0	0	0	0	0	0	0	0	5.07577e-05	0	0	0	0	0.0137418	0.000351834	0.0171881	0	0.00311134	0	3.16251e-05	0	0	0
ASV_232	d__Bacteria	p__Bacteroidota	c__Bacteroidia	o__Cytophagales	f__Hymenobacteraceae	g__Hymenobacter		0.0013861	0	0	0	0	0.000174591	0	0	8.20793e-05	0	0	0	0	0	0.000362845	0	0	0	0.0002727	0	0	0.000117108	0	0	0	8.6405e-05	0.000167134	0.000123235	0	0
ASV_233	d__Bacteria	p__Proteobacteria	c__Gammaproteobacteria	o__Burkholderiales	f__Comamonadaceae			0.0176589	0	0	0	0.000240442	0	0	5.85322e-05	0	0	0	0.000365171	0	0.000104752	0	0	0	0.000158984	0	0	0.000133648	0	0	0	0	0.0160973	0.000500113	0	0	0
ASV_234	d__Bacteria	p__Firmicutes	c__Clostridia	o__Peptostreptococcales-Tissierellales	f__Peptostreptococcales-Tissierellales	g__Anaerococcus	s__uncultured_bacterium	0.0277068	0	0	0	0.000200369	0	0	0	0	0	0	0.000243447	0	0.000104752	0	0	0	0.000547613	0	0.00263942	0.000165094	0.00685957	9.38988e-05	0.000175249	0	0.0164688	8.53133e-05	0.000123235	0	0
ASV_235	d__Bacteria	p__Bacteroidota	c__Bacteroidia	o__Sphingobacteriales	f__env.OPS_17	g__env.OPS_17	s__uncultured_bacterium	0.00220826	0	0	0	0	0	0	0	0	0	0.000149745	0	0	0	0	0	0.000216513	0	0	0.000568773	0	0	0	0.000565344	0.000137507	0	0	0.000404915	0	0.000165458
ASV_236	d__Bacteria	p__Proteobacteria	c__Gammaproteobacteria	o__Burkholderiales	f__Comamonadaceae			0.00902673	0	0	0	0	0	0.000269326	0	0	0	0	0	0	0.000119716	0	0	0	0.000135431	0	0	0	0	0	0	0	0.00850226	0	0	0	0
ASV_237	d__Bacteria	p__Proteobacteria	c__Alphaproteobacteria	o__Rhodobacterales	f__Rhodobacteraceae			0.0146774	0	0	0	0.00032059	0	0	0	0	0	0	0.000501302	0	0.000808085	0	0	0.000549925	0.0119356	0.0003333	0	4.71698e-05	0	0	0	0	0.000181451	0	0	0	0
ASV_238	d__Bacteria	p__Proteobacteria	c__Alphaproteobacteria	o__Rhizobiales	f__Beijerinckiaceae	g__Bosea		0.0288635	0	0	0	0	0	0	2.70149e-05	0	0	0	0.000142011	0	3.49172e-05	0	0	0	5.88831e-05	0	0	2.35849e-05	0	0	7.30204e-05	0	0.0153984	0.000291978	0.0128136	0	0
ASV_239	d__Bacteria	p__Proteobacteria	c__Gammaproteobacteria	o__Burkholderiales	f__Comamonadaceae			0.00284174	0	0	0	0	0	0	0.00136425	0	0	0.00147749	0	0	0	0	0	0	0	0	0	0	0	0	0	0	0	0	0	0	0
ASV_240	d__Bacteria	p__Verrucomicrobiota	c__Verrucomicrobiae	o__Chthoniobacterales	f__Chthoniobacteraceae	g__Chthoniobacter		0.0198399	0	0	0	0	0	1.94359e-05	0	0	0.000310688	0	0	0	0	0	6.526e-05	0	0	0	0	0	0	7.19295e-05	0	5.60774e-05	0	3.19925e-05	0	0.0192485	3.59692e-05
ASV_241	d__Bacteria	p__Bacteroidota	c__Bacteroidia	o__Sphingobacteriales	f__Sphingobacteriaceae	g__Pedobacter		0.00172657	0	0	0	0.000280516	0	0	5.40297e-05	0	0	0	0.000284022	0	4.98818e-05	0	0	0	0.000247309	0	0	0.000102201	0	0	0.000292082	0	7.77645e-05	0	0	0.000288404	5.03568e-05
ASV_242	d__Bacteria	p__Actinobacteriota	c__Actinobacteria	o__Corynebacteriales	f__Corynebacteriaceae	g__Corynebacterium	s__uncultured_bacterium	0.0248228	0	0	0	0	0.00170936	0	0	0.000184407	0	0	0	0.000633179	7.36829e-05	0.0213403	0.000148642	0.000342812	0	0.000123119	0	0	0.000267256	0	0	0	0	0	0	0	0
ASV_243	d__Bacteria	p__Firmicutes	c__Bacilli	o__Staphylococcales	f__Staphylococcaceae	g__Nosocomiicoccus	s__uncultured_bacterium	0.0211985	0	0	0	0	0	2.4989e-05	0	0	0	0	0	0	0	0	0.000101515	0	0	0	0	0	0	0.000107894	0	0.000126174	0	0.0080941	0	0.0127438	0
ASV_244	d__Bacteria	p__Firmicutes	c__Clostridia	o__Lachnospirales	f__Lachnospiraceae	g__Blautia	s__uncultured_bacterium	0.0152751	0	0	0	0	0	6.57479e-05	0	0.000273598	0	0	0	0.000150757	0	0.000113572	0	0	2.60638e-05	0.00468067	0	0.000102201	0.00779441	0.000186129	0	0.00188198	0	0	0	0	0
ASV_245	d__Bacteria	p__Bacteroidota	c__Bacteroidia	o__Flavobacteriales	f__Weeksellaceae	g__Chryseobacterium		0.0239787	0	0	0	0	0	0	4.95272e-05	0.0210123	0	0.000198911	0	0.000660481	0	0.000747033	0	0	0	0.000656499	0	0	0.000279758	0	0	0	0.000216013	0.000158125	0	0	0
ASV_246	d__Bacteria	p__Proteobacteria	c__Gammaproteobacteria	o__Burkholderiales	f__Comamonadaceae	g__Rhizobacter		0.0100086	0	0	0	0	0.00123669	0	0	0.00325581	0	0	0	0.00140151	0	0.00177154	0	0	0.000282978	0.0011918	0	0	0.000559517	0	0	0	9.75229e-05	0	0.00021126	0	0
ASV_247	d__Bacteria	p__Chloroflexi	c__Dehalococcoidia	o__GIF9	f__AB-539-J10	g__AB-539-J10	s__uncultured_bacterium	0.00806836	0	0	0	0	0	1.11062e-05	0	0	6.01052e-05	0	0.000243447	0.00021106	2.25756e-05	4.05055e-05	0.00710329	0.000270641	0	0	0	0	0	0	0	0	0	0	0.00010563	0	0
ASV_248	d__Bacteria	p__Nitrospirota	c__Thermodesulfovibrionia	o__uncultured	f__uncultured	g__uncultured		0.00682364	0	0	0	0	0	2.22125e-05	0	0	0.000276167	0	0.000259815	0	0	0.000198947	0.00532119	9.02136e-05	9.02288e-05	0.000153718	0.000237918	0	0	4.49559e-05	0	0	0	7.46491e-05	0	5.36209e-05	0
ASV_249	d__Bacteria	p__Bacteroidota	c__Bacteroidia	o__Bacteroidales	f__Prevotellaceae	g__Prevotella	s__uncultured_bacterium	0.0119904	0	0	0	0.00052755	0	0	0.00013048	0	0	0	0.000197973	3.22186e-05	2.25756e-05	0	0	0	0.00390584	7.06999e-05	0.000145619	0.000690904	0.00399061	0	0.00084488	0	0	0.00143103	0	0	0
ASV_250	d__Bacteria	p__Proteobacteria	c__Alphaproteobacteria	o__Sphingomonadales	f__Sphingomonadaceae	g__Sphingomonas		0.0117176	0	0	0	0.00128957	0	0	0	0.000875513	0	0	0	0.000724918	0	0.00341573	0	0.000306726	0	0.0003737	0	0	0	0	0.00388645	0	0.000738388	0.000106642	0	0	0
ASV_251	d__Bacteria	p__Proteobacteria	c__Alphaproteobacteria	o__Rhodobacterales	f__Rhodobacteraceae	g__Paracoccus		0.0170626	0	0	0	0	0	0	0	0	0	0	0	0	0	0	0	0	0.00170134	0.000189414	0.014061	0	0	0	0	0	0	0.000110688	0.000158445	0	0.000841678
ASV_252	d__Bacteria	p__Proteobacteria	c__Alphaproteobacteria	o__Azospirillales	f__Azospirillaceae	g__Azospirillum		0.000886333	0	0	0	0.000260479	0	0	2.70149e-05	0	0	0	6.08618e-05	0	5.487e-05	0	0	0	0.000100101	0	0	5.50314e-05	0	0	0.000131437	0	0	0	0	5.36209e-05	0.000142917
ASV_253	d__Bacteria	p__Proteobacteria	c__Gammaproteobacteria	o__Aeromonadales	f__Aeromonadaceae	g__Aeromonas		0.0131295	0	0	0	0.000400737	0	0	6.75371e-05	0	0	0	0.000344884	0	0.000194539	0	0	0	0.00997021	0.000729417	0.000276261	0.000290881	0	0.000244063	0.000438122	0	0.00017281	0	0	0	0
ASV_254	d__Bacteria	p__Proteobacteria	c__Alphaproteobacteria	o__Caulobacterales	f__Caulobacteraceae	g__Caulobacter		0.0124349	0.000151796	0	0	0	0	0	0	0	0	0	0	0	0	0	0.000123269	0	0	0	0	0	0	8.99119e-05	0	0	0.000190091	0.0117852	0.00024647	0	0
ASV_256	d__Bacteria	p__Proteobacteria	c__Gammaproteobacteria	o__Burkholderiales	f__Oxalobacteraceae	g__Massilia		0.0110901	0.000151796	0	0	0	0	0.00024989	0	0.000519836	0.00245098	0.00482857	0	0.000418841	0	0	0	0.00113913	0	0	0	0	0	0.000251753	0	0.000518716	0	0.000543872	0	0.000168523	0
ASV_257	d__Bacteria	p__Actinobacteriota	c__Actinobacteria	o__Frankiales	f__Geodermatophilaceae	g__Geodermatophilus		0.0245552	0.000151796	0	0	0	0	3.33187e-05	0	0	0	0	0	0	0	0	7.25111e-05	0	0	0	0	0	0	0.000188815	0	0	0	0.0239451	0.00024647	6.89412e-05	0
ASV_258	d__Bacteria	p__Proteobacteria	c__Alphaproteobacteria	o__Sphingomonadales	f__Sphingomonadaceae	g__Sphingopyxis	s__uncultured_bacterium	0.018241	0.000151796	0	0	0	0	3.60953e-05	0	0	0.000517813	0	0	0	0	0	7.25111e-05	0	0	0	0	0	0	0.000125877	0	0.000182252	0	0.000234612	0	0.0169056	0.000166257
ASV_260	d__Bacteria	p__Proteobacteria	c__Alphaproteobacteria	o__Rickettsiales	f__Mitochondria	g__Mitochondria		0.0190623	0.000151796	0	0	0	0	0	0	0	0	0	0	0	0	0	0.00014055	0	0	0	0	0	0	0.000326286	0	0.00012599	8.49981e-05	0.0176266	0.000757917	0	0
ASV_261	d__Bacteria	p__Proteobacteria	c__Alphaproteobacteria	o__Rhizobiales	f__Beijerinckiaceae	g__Psychroglaciecola		0.0494751	0.000151796	0	0	0.042605	0.000555626	0.000292224	3.60198e-05	0	0	0	0.000202873	0	6.98345e-05	0	0	0	7.06597e-05	0	0	8.6478e-05	0	0	0.00555641	0	0	0	0	0	0
ASV_262	d__Bacteria	p__Firmicutes	c__Bacilli	o__Lactobacillales	f__Carnobacteriaceae			0.0198656	0.000151796	0	0	0	0	0.000249842	0	0	0	0	0	0	0	0	7.02749e-05	0	0	0	0	0	0	0.000309971	0	6.29951e-05	0.000429746	0.016637	0.00181232	0.000293479	0
ASV_263	d__Bacteria	p__Firmicutes	c__Clostridia	o__Lachnospirales	f__Lachnospiraceae	g__Coprococcus		0.0162239	0.000151796	0	0	0	0.000218239	0	0	0.000437756	0	0	0	0.00022553	0	0.000298813	0	0	0	0.0002222	0	0.000376991	0.0142852	0.000159156	0	0	0	0	0	0	0
ASV_264	d__Bacteria	p__Actinobacteriota	c__Actinobacteria	o__Actinomycetales	f__Actinomycetaceae	g__Actinomyces		0.0262174	0.000151796	0	0	0	0	0	0	0	0	5.90764e-05	0	0	0	0	0.00118296	0	5.88831e-05	0.0029075	0	0	0	0.00471483	0.0171524	0.000141739	0	0	0	0	0
ASV_265	d__Bacteria	p__Actinobacteriota	c__Actinobacteria	o__Micrococcales				0.00583013	0.000151796	0	0	0	0.000305535	0	0	0.000629275	0	0	0	0.000306076	0	0.000512251	0	0	0	0.000646399	0	0	0.000299277	0	0	0	0	0	0	0.00305218	7.91321e-05
ASV_266	d__Bacteria	p__Actinobacteriota	c__Actinobacteria	o__Micrococcales	f__Micrococcaceae			0.000125786	0.000151796	0	0	0	0	0	0	0	0	0	0	0	0	0	0	0	0	0	0	0.000125786	0	0	0	0	0	0	0	0	0
ASV_267	d__Bacteria	p__Proteobacteria	c__Gammaproteobacteria	o__Pseudomonadales	f__Moraxellaceae			0.00341372	0.000151796	0	0	0	0.000378281	0	0	0.000601915	0	0	0	0.000628262	0	0.000875096	0	0	0	0.0004949	0	0	0.000208192	0	0.000116833	0.000110241	0	0	0	0	0
ASV_268	d__Bacteria	p__Actinobacteriota	c__Actinobacteria	o__Corynebacteriales	f__Corynebacteriaceae	g__Corynebacterium		0.0243855	0.000151796	0	0	0	0	0	0	0.00027661	0	0	0.000237567	0	0	0	0	0	0.00350926	0.000876038	0	0.000887261	0.0153995	0.000300329	0	0	0	5.33208e-05	0	0.00278805	5.75506e-05
ASV_269	d__Bacteria	p__Firmicutes	c__Bacilli	o__Bacillales	f__Bacillaceae	g__Bacillus		0.0416276	0.000151796	0	0	0	0	0	0	0	0	0	0	0	0	0	0	0.000549925	0.000354335	0.000498706	0.0377079	0	0	0	0	0	0	0	0.00201798	0	0.00049877
ASV_270	d__Bacteria	p__Actinobacteriota	c__Actinobacteria	o__Corynebacteriales	f__Corynebacteriaceae	g__Corynebacterium	s__uncultured_bacterium	0.0243082	0.000151796	0	0	0	0.00105817	0	0	0.0188648	0.000240421	0.000239593	0	0	0	0	0	0	0	0.00169999	0.000292512	0	0.00191277	0	0	0	0	0	0	0	0
ASV_271	d__Archaea	p__Crenarchaeota	c__Bathyarchaeia	o__Bathyarchaeia	f__Bathyarchaeia	g__Bathyarchaeia	s__uncultured_archaeon	0.0166751	0.000151796	0	0	0	0	0	0	0	0	0	0	0	0	0	0.016605	0	0	0	0	0	0	0	0	7.00967e-05	0	0	0	0	0
ASV_272	d__Bacteria	p__Proteobacteria	c__Gammaproteobacteria	o__Burkholderiales	f__Methylophilaceae	g__uncultured		0	0.000151796	0	0	0	0	0	0	0	0	0	0	0	0	0	0	0	0	0	0	0	0	0	0	0	0	0	0	0	0
ASV_273	d__Bacteria	p__Proteobacteria	c__Gammaproteobacteria	o__Pseudomonadales	f__Pseudomonadaceae	g__Pseudomonas		0.00888127	0.000151796	0	0	0	0	0.00319754	0.00252262	0	0	0.00131786	0	0	0.000545576	0	0	0.000628486	0	0	0	0.000489367	0	0.000179824	0	0	0	0	0	0	0
ASV_274	d__Bacteria	p__Proteobacteria	c__Gammaproteobacteria	o__Salinisphaerales	f__Solimonadaceae	g__Hydrocarboniphaga		0.0345946	0.000151796	0.000151796	0	0	0.00020369	0	0	0.000355677	0	0	0.000782384	0.0325362	0	0.000394622	0	0	0	0.0001919	0	0	0.00013012	0	0	0	0	0	0	0	0
ASV_275	d__Bacteria	p__Actinobacteriota	c__Actinobacteria	o__Micrococcales	f__Micrococcaceae	g__Kocuria		0.0121081	4.58631e-05	0	0	0	0	0	0	0.00835362	0.000483292	0.000129779	0.00022316	0	0	0	0	0	8.83247e-05	0	0	0	0	0	0.000102229	0	0	0.00272766	0	0	0
ASV_276	d__Bacteria	p__Firmicutes	c__Clostridia	o__Lachnospirales	f__Lachnospiraceae			0.0183425	4.58631e-05	0	0	0	0	8.32968e-06	0	0	0.000210368	0	0	0	0	0	9.95561e-05	0.000180427	0	0.00107019	0.000146256	0	0.000267256	0.000375228	0	6.29951e-05	0.000438922	0.013521	0.00137499	0.000586958	0
ASV_277	d__Bacteria	p__Proteobacteria	c__Gammaproteobacteria	o__Pseudomonadales	f__Moraxellaceae	g__Acinetobacter		0.0224628	4.58631e-05	0	0	0	0	0	0	0	0	0	0	0	0.000139669	0.021357	0.000334658	0.000631495	0	0	0	0	0	0	0	0	0	0	0	0	0
ASV_278	d__Bacteria	p__Proteobacteria	c__Gammaproteobacteria	o__Burkholderiales	f__Methylophilaceae			0.0252711	4.58631e-05	0	0	0	0	0	0	0	0	0	0	0	0	0	0	0	0	0	0	0	0	0.0109153	0.0143558	0	0	0	0	0	0
ASV_279	d__Bacteria	p__Proteobacteria	c__Alphaproteobacteria	o__Caulobacterales	f__Caulobacteraceae	g__Asticcacaulis		0.0161386	4.58631e-05	0	0	0	0	0	0	0	0	0.000189678	0	0	0	0	0	0.000288684	0	0	0.000617525	0	0	0	0	0	0	0	0.000123235	0.000851185	0.0140683
ASV_280	d__Bacteria	p__Firmicutes	c__Negativicutes	o__Veillonellales-Selenomonadales	f__Veillonellaceae	g__Veillonella		0.0604726	0.0103373	0	0	0.000117233	0	0	0	0	0	5.98982e-05	0.000118784	0	4.13885e-05	0	0	0.000180427	4.84042e-05	0	0.00026001	0	0	0	0.0594566	0.000168232	0	0	0	0	2.15815e-05
ASV_281	d__Bacteria	p__Bacteroidota	c__Bacteroidia	o__Flavobacteriales	f__Flavobacteriaceae	g__Flavobacterium		0.00155777	0.0103373	0	0	0	0.000352724	0.000771883	0	0	0	0	0	0	0	0	0	0	5.88831e-05	0	0.000259374	0	0	0	0	0	0	0	0	0.000114902	0
ASV_282	d__Bacteria	p__Proteobacteria	c__Alphaproteobacteria	o__Rhizobiales	f__Rhizobiaceae	g__Allorhizobium-Neorhizobium-Pararhizobium-Rhizobium		0.00574419	0.0103373	0	0	0	0	0	0	0	0	0	0	0.00045227	0	0.00022278	0.0041755	0	0	6.15594e-05	0	0	0.000231622	0	0	0.000141739	0.000181451	0.000277268	0	0	0
ASV_283	d__Bacteria	p__Firmicutes	c__Bacilli	o__Bacillales	f__Bacillaceae	g__Bacillus		0.0229462	0.0227885	0	0	0	0	1.66594e-05	0	0	0.000276167	0	0	0	0	0	5.80088e-05	0	0	0	0	0	0	8.99119e-05	0	0	0.000232422	0.0218295	0.000366905	7.66014e-05	0
ASV_285	d__Bacteria	p__Proteobacteria	c__Gammaproteobacteria	o__Burkholderiales	f__Methylophilaceae			0.0230573	0.0227885	0	0	0.000410317	0	0	0	0	0	0	0	0	4.13885e-05	0	0	0.000216513	0.00266223	0	0.000390016	0.000355904	0	0	7.30204e-05	0.00350484	0.00022291	0	0.0101405	0.00177835	0.00326135
ASV_286	d__Bacteria	p__Proteobacteria	c__Gammaproteobacteria	o__Burkholderiales	f__Comamonadaceae			0.0206342	0.0227885	0	0	0	0	0	0	0	0	0	0	0	0	0.0175996	0	0	0	0	0	0.00303459	0	0	0	0	0	0	0	0	0
ASV_287	d__Bacteria	p__Firmicutes	c__Clostridia	o__uncultured	f__uncultured	g__uncultured	s__uncultured_bacterium	0.0180458	0.0227885	0	0	0	0	0	0	0	0.000195342	0	0	0	0	0	0.000111269	0	0	0	0	0	0	0.000326286	0	8.66183e-05	0.000270333	0.0152414	0.00157975	0.000234783	0
ASV_288	d__Bacteria	p__Bacteroidota	c__Bacteroidia	o__Sphingobacteriales	f__NS11-12_marine_group	g__NS11-12_marine_group		0.0179741	0.0227885	0	0	8.01475e-05	0	0	0	0	0	0	0.000121724	0	6.48463e-05	0	0	0	0.000123655	0	0	0.000110063	0	0	0.000189853	0	0.016983	0.000159962	0.00014084	0	0
ASV_290	d__Bacteria	p__Bacteroidota	c__Bacteroidia	o__Bacteroidales	f__Prevotellaceae	g__Prevotella	s__uncultured_bacterium	0.0133152	0.0227885	0	0	0	0.000116394	0	0	0.000164159	0	0	0	0	0	0.000128063	0	0	0	0.00201156	0	0.000256568	0.0106384	0	0	0	0	0	0	0	0
ASV_291	d__Archaea	p__Crenarchaeota	c__Nitrososphaeria	o__Nitrososphaerales	f__Nitrososphaeraceae	g__Nitrososphaeraceae		0.00674304	0.0227885	0	0	0	0	0	0	0	0	0	0.000118784	0	0	0	0.00662426	0	0	0	0	0	0	0	0	0	0	0	0	0	0
ASV_292	d__Bacteria	p__Proteobacteria	c__Gammaproteobacteria	o__Burkholderiales	f__Methylophilaceae			0.0163027	0.0227885	0	0	0	0	0	0	0	0	0	0	0	0	0	0	0	0	0	0	0	0	0	0	0	0	0.0163027	0	0	0
ASV_293	d__Bacteria	p__Firmicutes	c__Clostridia	o__Clostridiales	f__Clostridiaceae	g__Clostridium_sensu_stricto_1		0.0091277	0.0227885	0	0	0.000200369	0	0.00034707	0.000968032	5.47196e-05	0.000138083	0	0.000584411	9.66557e-05	7.48227e-05	0	0	0	0.00600486	0.0001414	0.000105311	0.000125786	0	4.49559e-05	0	0.000112155	8.6405e-05	4.26567e-05	0	0	0
ASV_294	d__Bacteria	p__Firmicutes	c__Clostridia	o__Oscillospirales	f__Ruminococcaceae	g__Ruminococcus	s__uncultured_bacterium	0.0137792	0.0227885	0	0	0	0.00018914	0	0	0.000218878	0	0	0	0.000241639	0	0.000341501	0	0	0	0.0002121	0	0.000102201	0.0122403	0.000233404	0	0	0	0	0	0	0
ASV_295	d__Bacteria	p__Bacteroidota	c__Bacteroidia	o__Cytophagales	f__Spirosomaceae	g__Lacihabitans	s__uncultured_bacterium	0.00459617	0.0227885	0	4.58631e-05	0.000883732	0.000135663	0.00171405	0.000162089	0	0	0.000231761	0	0	7.52519e-06	0	0	0.000234555	0.000528722	0	0.000227509	8.89759e-05	0	0	0	0	5.57274e-05	4.26567e-05	0.00021126	0	7.19383e-05
ASV_296	d__Bacteria	p__Proteobacteria	c__Alphaproteobacteria	o__Sphingomonadales	f__Sphingomonadaceae	g__Sphingomonas		0.019472	0.0227427	0	0	0	0.000290985	0.000155487	0	0.000437756	0	0	0	0	0	0.000554939	0	0	0.000182538	0.0173041	0.00044854	0	9.75902e-05	0	0	0	0	0	0	0	0
ASV_297	d__Bacteria	p__Fusobacteriota	c__Fusobacteriia	o__Fusobacteriales	f__Fusobacteriaceae	g__Fusobacterium		0.0106336	0.0227427	0	0	0.000468933	0	0	0.000235477	0	0	0	0.000356351	0	9.50329e-05	0	0	0	0.0078502	9.43766e-05	0.000261976	0.000649098	0	0	0.000524669	0	9.75229e-05	0	0	0	0
ASV_299	d__Bacteria	p__Actinobacteriota	c__Actinobacteria	o__Micrococcales	f__Brevibacteriaceae	g__Brevibacterium	s__uncultured_bacterium	0.0267607	0.0227427	0	0	0	0	0	0	0	0	1.3633e-05	0.0165109	0.000271362	0	0	0	0	4.46808e-05	0	0.000130005	4.71698e-05	0.00137927	0.00262261	0	2.36232e-05	0	0	0	6.12811e-05	0.00565611
ASV_300	d__Bacteria	p__Proteobacteria	c__Gammaproteobacteria	o__Enterobacterales	f__Erwiniaceae	g__Pantoea		0.027526	0.0227427	0	0	0	0	0	0	0	0	0	0	0	0	0	0	0	4.46808e-05	0	0.000292512	0.0263501	0.000332614	0.000506109	0	0	0	0	0	0	0
ASV_301	d__Bacteria	p__Proteobacteria	c__Alphaproteobacteria	o__Sphingomonadales	f__Sphingomonadaceae	g__Sphingomonas		0.00285541	0.0227427	0.00575361	0.00453779	0	0	0	0	0	0	0	0	0	0	0	0	0	0	0.00285541	0	0	0	0	0	0	0	0	0	0	0
ASV_302	d__Bacteria	p__Proteobacteria	c__Gammaproteobacteria	o__Xanthomonadales	f__Xanthomonadaceae	g__Xanthomonas		0.00323361	0.0124513	0	0	0	0.000232788	0	0	0.000492476	0	0	0	0.000306076	0	0.000576283	0	0.000252598	0	0.0003535	0.000162507	0	0.000104096	0	0	0	9.50455e-05	9.48752e-05	0.00056336	0	0
ASV_303	d__Bacteria	p__Proteobacteria	c__Alphaproteobacteria	o__Rhizobiales	f__Beijerinckiaceae	g__Bosea		0.0145016	0.0124513	0	0	0	0	0	0	0	0	0.000219627	0	0	0	0	0	0.000451068	0	0	0.000763781	0	0	0	0	0	0	0	0	0.000479812	0.0125873
ASV_304	d__Bacteria	p__Proteobacteria	c__Gammaproteobacteria	o__Burkholderiales	f__Gallionellaceae	g__Gallionella		0	0.0124513	0.0104197	0.00203158	0	0	0	0	0	0	0	0	0	0	0	0	0	0	0	0	0	0	0	0	0	0	0	0	0	0
ASV_305	d__Bacteria	p__Proteobacteria	c__Gammaproteobacteria	o__Pseudomonadales	f__Moraxellaceae	g__Acinetobacter		0.0410679	0	0	0	0.0165299	0	0	0.00400139	0	0	0.000139762	0	0	3.38634e-05	0	0	0.000378897	4.09574e-05	0	0.0110342	0.00350779	0	0.00187614	0	0	0	0	0	0	0.00352498
ASV_307	d__Bacteria	p__Proteobacteria	c__Alphaproteobacteria	o__Rhizobiales	f__Rhizobiaceae	g__Aureimonas		0.0160186	0	0	0	0	0	0.000170945	0	0	6.01052e-05	0	0	0	0	0	9.95561e-05	0	0	0	0	0	0	0.000212086	0.00146031	0.0139682	0	4.74376e-05	0	0	0
ASV_308	d__Bacteria	p__Bacteroidota	c__Bacteroidia	o__Sphingobacteriales	f__env.OPS_17	g__env.OPS_17	s__uncultured_bacterium	0.00111824	0	0	0	0	0	0	0	0	0	8.98473e-05	0	0	0	0	0	0.000216513	0	0	0.000471269	0	0	0	0	0.00017515	0	0	0	0	0.000165458
ASV_310	d__Bacteria	p__Actinobacteriota	c__Actinobacteria	o__Pseudonocardiales	f__Pseudonocardiaceae	g__Pseudonocardia		0.00970116	0	0	0	0.00052755	0	0	0.000434934	0	0	0	0.000237567	0	0	0	0	0	0.00637342	0.000208324	0.000578545	0.000622831	0	0	0	0	9.75229e-05	0	0	0.000620471	0
ASV_311	d__Bacteria	p__Proteobacteria	c__Alphaproteobacteria	o__Rhizobiales	f__Rhizobiaceae	g__Aureimonas		0.0124347	0	0	0	0	0.00018914	0	0	0.000300958	0	0	0	0.000144984	0	0	0	0	0	0	0	0.000133648	0.0114376	0.0002284	0	0	0	0	0	0	0
ASV_312	d__Bacteria	p__Acidobacteriota	c__Vicinamibacteria	o__Vicinamibacterales	f__uncultured	g__uncultured		0.0276703	0	0	0	0.000644783	0	0	0.000565414	0	0	0	0.000277162	0	7.14893e-05	0	0	0	8.56381e-05	0	0	0.000533855	0	0	0.000591416	0	0.0242275	0.000204275	0.000468834	0	0
ASV_313	d__Bacteria	p__Proteobacteria	c__Alphaproteobacteria	o__Rhodobacterales	f__Rhodobacteraceae			0.00877639	0	0	0	0	0	9.99561e-05	0.000441243	0	0	0.000404446	0.000182585	0	0.00682985	0.000362845	0.000166775	0.000288684	0	0	0	0	0	0	0	0	0	0	0	0	0
ASV_314	d__Bacteria	p__Proteobacteria	c__Gammaproteobacteria	o__Burkholderiales	f__Comamonadaceae			0.00366814	0	0	0	0	0	0	0	0	0	0	0	0	0.00357823	0	0	0	0	0	0	0	0	8.99119e-05	0	0	0	0	0	0	0
ASV_315	d__Bacteria	p__Firmicutes	c__Clostridia	o__Peptostreptococcales-Tissierellales	f__Peptostreptococcales-Tissierellales	g__Peptoniphilus		0.016159	0	0	0	6.01106e-05	0	0	4.95272e-05	0	0	0	0.000202873	0	7.98108e-05	0	0	0	0.000219596	0	0	0.000133648	0	0	7.30204e-05	0	0.0146975	0.00015647	0.000486439	0	0
ASV_316	d__Bacteria	p__Proteobacteria	c__Alphaproteobacteria	o__Rhizobiales	f__Beijerinckiaceae	g__Methylobacterium-Methylorubrum		0.0124753	0.000284199	0	0	0	0.000244194	0.000197244	0	0.000110644	0.000165289	0	0	0	0	0	0	0	0	0.00441334	0	0	0	0.000293657	0.000116833	0.0064205	0	0.000102781	0	0.00041087	0
ASV_318	d__Bacteria	p__Actinobacteriota	c__Actinobacteria	o__Propionibacteriales	f__Propionibacteriaceae	g__Cutibacterium	s__uncultured_bacterium	0.0149061	0.000284199	0	0	0	0	0	0	0	0	0	0	0	0	0	0	0	0.000677156	0.0012307	0	0.00720912	0	0	0	0	0.00578914	0	0	0	0
ASV_319	d__Bacteria	p__Bacteroidota	c__Bacteroidia	o__Cytophagales	f__Spirosomaceae	g__Dyadobacter		0.0146283	0.000284199	0	0	0	0	5.25984e-05	0	0	9.01578e-05	0	0	0	0	6.40314e-05	0.00332881	5.41282e-05	0	0	0	0	0	0.0001142	0.000428713	0.0102563	0	6.32501e-05	0	0.000176087	0
ASV_320	d__Bacteria	p__Patescibacteria	c__Parcubacteria	o__Candidatus_Azambacteria	f__Candidatus_Azambacteria	g__Candidatus_Azambacteria		0.00423996	0.000284199	0	0	0	0	0	0	0	0	0	0	0	0	0	0	0	2.97872e-05	0.0022777	0.000211258	0	0	0	0	0.00172122	0	0	0	0	0
ASV_322	d__Bacteria	p__Actinobacteriota	c__Actinobacteria	o__Corynebacteriales	f__Corynebacteriaceae	g__Corynebacterium		0.00492002	0.000284199	0	0	0	0	0	0	0	0	0	0	0	0	0	0	0	0	0.00492002	0	0	0	0	0	0	0	0	0	0	0
ASV_323	d__Bacteria	p__Bacteroidota	c__Bacteroidia	o__Flavobacteriales	f__Flavobacteriaceae	g__Capnocytophaga	s__uncultured_bacterium	0.0159805	0.000284199	0	0	0.000140258	0	0	3.15173e-05	0	0	0	0.00022316	0	2.99291e-05	0	0	0	7.06597e-05	2.02e-05	0.00228121	0.0130055	4.55421e-05	4.49559e-05	8.76245e-05	0	0	0	0	0	0
ASV_325	d__Bacteria	p__Proteobacteria	c__Gammaproteobacteria	o__Pseudomonadales	f__Pseudomonadaceae	g__Pseudomonas		0.00277212	0.000284199	0	0	0	0	0	5.40297e-05	0	0	0	0.000385458	0	0.000191034	0	0	0.00164978	9.4213e-05	0	0	0.000251572	0	0	0.000146041	0	0	0	0	0	0
ASV_326	d__Bacteria	p__Actinobacteriota	c__Actinobacteria	o__Micrococcales	f__Brevibacteriaceae	g__Brevibacterium		0.00155046	0.000284199	0	0	0	0.000244194	5.83077e-05	0	0.000147525	0	0	0	0.000422119	0	3.03791e-05	0	0	0	6.62948e-05	0	0	0.000320707	0	0	0	0.000111455	7.90626e-05	7.04201e-05	0	0
ASV_327	d__Bacteria	p__Firmicutes	c__Bacilli	o__Staphylococcales	f__Staphylococcaceae	g__Staphylococcus		0.0121035	0.000284199	0	0	0	0	0	0	0	0	0	0	0	0	0	0	0	0	0	0	0	0	0	0	0	0	0	0	0	0.0121035
ASV_329	d__Bacteria	p__Proteobacteria	c__Gammaproteobacteria	o__Pseudomonadales	f__Pseudomonadaceae	g__Pseudomonas		0.0183106	0.000284199	0	0	0	0	0	3.60198e-05	0	0	0	0	0	0	0	0	0	0.00367431	0	0	0	0	0	0.00156254	0.00691945	0	0	0	0	0.00611824
ASV_330	d__Bacteria	p__Proteobacteria	c__Alphaproteobacteria	o__Rhodobacterales	f__Rhodobacteraceae	g__Paracoccus		0.0253904	0.000284199	0	0	0	0	0	0.000826374	0	0.000255447	0	0	0	5.26763e-05	0	0.000105412	0	0.00200691	0	0	0.00147615	7.15661e-05	0.00853237	0	0	0.0031068	0	0.00770501	0	0.00125173
ASV_331	d__Bacteria	p__Firmicutes	c__Bacilli	o__Staphylococcales	f__Staphylococcaceae			0.0171877	0.000284199	0	0	0	0	0	0	0	0.000180316	0	0	0	0	0	0	0	0.000100101	0.00472458	0	0.000458105	0.000110602	0.00680639	0	3.93719e-05	0	0.000600876	0	0.0041674	0
ASV_332	d__Bacteria	p__Actinobacteriota	c__Actinobacteria	o__Propionibacteriales	f__Nocardioidaceae	g__Marmoricola		0.00591496	0.000496249	0	0	0.000300553	0.000637812	0.000276141	0	0	0	0	0	0	0	0	0	0.000157122	0	0.00104178	0	0	0	0	0	0.00185048	0	0	0.00165107	0	0
ASV_333	d__Bacteria	p__Acidobacteriota	c__Blastocatellia	o__Pyrinomonadales	f__Pyrinomonadaceae	g__RB41		0.000879959	0.000496249	0	0	0	0.000135663	0	0	0.000165966	0	0	0	0	0	0.000121517	0	0	0	0	0	0	0.000285073	0	8.76245e-05	8.41161e-05	0	0	0	0	0
ASV_334	d__Bacteria	p__Nitrospirota	c__Thermodesulfovibrionia	o__uncultured	f__uncultured	g__uncultured	s__uncultured_bacterium	0.00288019	0.000496249	0	0	0	0	0.0014596	0	0	0.000207125	0	0.000499342	0.000418413	0	0	0	0	0	0	0.000113755	0	0	4.89428e-05	0	0	0	0	0	0	0.000133005
ASV_335	d__Bacteria	p__Actinobacteriota	c__Actinobacteria	o__Corynebacteriales	f__Mycobacteriaceae	g__Mycobacterium		0.00903059	0.000496249	0	0	0	0	0	0	0.000540686	0	0	7.91891e-05	4.83279e-05	0	7.08846e-05	0	0	0.000971806	0.00686456	0.000325013	0	0.00013012	0	0	0	0	0	0	0	0
ASV_336	d__Bacteria	p__Bacteroidota	c__Bacteroidia	o__Bacteroidales	f__Dysgonomonadaceae	g__Dysgonomonas	s__uncultured_bacterium	0.030501	0.000496249	0	0	8.01475e-05	5.42652e-05	0	1.35074e-05	0	0	0.000122697	0.0107167	0.0109953	1.99527e-05	0	0	0	0.00475715	0.000103218	0	3.14465e-05	0.00356341	0	0	0	4.32025e-05	0	0	0	0
ASV_338	d__Bacteria	p__Bacteroidota	c__Bacteroidia	o__Chitinophagales	f__Chitinophagaceae	g__uncultured		0.00436972	0.000496249	0	0	0	0	0.000236693	0	0	0.000255447	0	0	0	0	0	6.44187e-05	0	0.000630382	0.000247465	0.000211258	0	0	0.000163143	0.000253464	0.00019686	0	0.00204017	7.04201e-05	0	0
ASV_339	d__Bacteria	p__Patescibacteria	c__Parcubacteria	o__Candidatus_Yanofskybacteria	f__Candidatus_Yanofskybacteria	g__Candidatus_Yanofskybacteria	s__uncultured_bacterium	0.000751202	0.000496249	0.000135926	0.000148273	0	0	0	0	0	0	0	0.00044142	0.000309782	0	0	0	0	0	0	0	0	0	0	0	0	0	0	0	0	0
ASV_340	d__Bacteria	p__Chloroflexi	c__Chloroflexia	o__Thermomicrobiales	f__JG30-KF-CM45	g__JG30-KF-CM45	s__uncultured_bacterium	0.0157895	0.00249043	0	0	0	0	1.66594e-05	0	0	0.000241646	0	0	0	0	0	0	0	0	0	0	0.000266928	0.000283968	0.0149344	0	0	0	0	0	4.59608e-05	0
ASV_341	d__Bacteria	p__Actinobacteriota	c__Thermoleophilia	o__Solirubrobacterales	f__Solirubrobacteraceae	g__Conexibacter		0.00198095	0.00249043	0	0	0	0	2.77656e-05	0.000198109	0	0.000517813	4.08991e-05	0	0	0	0	7.25111e-05	0	0.000105122	0.000132889	0.000373128	0	0	0.000143859	0	0.000196271	0	9.59775e-05	0	7.66014e-05	0
ASV_342	d__Bacteria	p__Proteobacteria	c__Alphaproteobacteria	o__Sphingomonadales	f__Sphingomonadaceae	g__Sphingomonas	s__uncultured_bacterium	0.0139369	0.00249043	0	0	0	0	0	0	0	0	0	0	0	0	0	0	0	0	0	0	0	0	0	0	0	0	0.00615322	0	0	0.00778372
ASV_343	d__Bacteria	p__Proteobacteria	c__Gammaproteobacteria	o__Burkholderiales	f__Comamonadaceae			0.0277241	0.00249043	0	0	0	0	0	0	0	0	0	0	0.0277241	0	0	0	0	0	0	0	0	0	0	0	0	0	0	0	0	0
ASV_345	d__Bacteria	p__Proteobacteria	c__Gammaproteobacteria	o__Burkholderiales	f__Methylophilaceae	g__uncultured		0.0348535	0.00249043	0	0	0	0	0	0	0	0	0	0.0348535	0	0	0	0	0	0	0	0	0	0	0	0	0	0	0	0	0	0
ASV_346	d__Bacteria	p__Cyanobacteria	c__Cyanobacteriia	o__Cyanobacteriales	f__Nostocaceae	g__Scytonema_UTEX_2349		0.00763834	0.00249043	0	0	0.000410317	0	0	0	0	0	0	0.000197973	0	0	0	0	0	0.00609052	6.05999e-05	7.54119e-05	0.000311416	0	0	0.00042244	0	6.96592e-05	0	0	0	0
ASV_347	d__Bacteria	p__Planctomycetota	c__Planctomycetes	o__Gemmatales	f__Gemmataceae	g__Gemmata	s__uncultured_bacterium	0.000369814	0.00249043	0	0	0	0	0	0	0	0	0	0	0	0	0	0	0.00019847	0	0	0	0	0	0	5.84163e-05	0.000112928	0	0	0	0	0
ASV_348	d__Bacteria	p__Proteobacteria	c__Alphaproteobacteria	o__Rhodobacterales	f__Rhodobacteraceae	g__Paracoccus		0.0267157	0.00249043	0	0	0	0	0	0	0	0	0.000299491	0	0	0	0	0	0	4.71065e-05	0.0001717	0.0259685	0	0	0	0	0	0	0	0.000228865	0	0
ASV_349	d__Bacteria	p__Firmicutes	c__Bacilli	o__Bacillales	f__Bacillaceae	g__Bacillus		0.0175379	0.00249043	0	0	0	0	0	0	0.000110644	0	0	0	0	0.000172307	0.0162106	0.000266608	0.000581689	0	0	0	0	0.000195988	0	0	0	0	0	0	0	0
ASV_351	d__Bacteria	p__Proteobacteria	c__Gammaproteobacteria	o__Burkholderiales	f__Gallionellaceae	g__Gallionella		0.0124491	0.00249043	0	0	0	0	0	0	0	0	0	0	0	0.000184563	0.000600116	0.0115655	0	0	0	0	0	0	9.89031e-05	0	0	0	0	0	0	0
ASV_353	d__Bacteria	p__Proteobacteria	c__Alphaproteobacteria	o__Rhodobacterales	f__Rhodobacteraceae	g__Rubellimicrobium	s__uncultured_bacterium	0.0125424	0.00249043	0	0	0	0	2.22125e-05	0	0	0.000241646	0	0	0	5.487e-05	0.000234782	0.0117183	0.000144342	0	0	0	0	0	0	0	0.000126174	0	0	0	0	0
ASV_354	d__Bacteria	p__Actinobacteriota	c__Actinobacteria	o__Micrococcales	f__Micrococcaceae	g__Kocuria		0.01364	0.00249043	0	0.00021205	0	0	0	0	0	0	0.000127241	0	0.000361816	0	0	0	0	0	0	0	0	0	0.00962057	0	0.000952801	0.00239628	0.000181291	0	0	0
ASV_355	d__Bacteria	p__Proteobacteria	c__Alphaproteobacteria	o__Caulobacterales	f__Caulobacteraceae	g__Asticcacaulis		0.0105174	0.00227838	0	0	0	0	0	0.000173974	0.000136799	0	0	0	0	5.50417e-05	0.00017075	2.92812e-05	0	0.00373089	0.00527978	0.000195008	0.00022244	5.20481e-05	4.89428e-05	0.00042244	0	0	0	0	0	0
ASV_356	d__Bacteria	p__Actinobacteriota	c__Actinobacteria	o__Micrococcales	f__Brevibacteriaceae	g__Brevibacterium	s__uncultured_bacterium	0.008788	0.00227838	0	0	0	0	0	0	0	0	0	0	0	1.8813e-05	0	0	0	0	0.00299747	0	0.000400391	0.000403373	0	0	0	0	0.000419032	0	0.00454892	0
ASV_357	d__Bacteria	p__Proteobacteria	c__Gammaproteobacteria	o__Burkholderiales	f__Comamonadaceae			0.0120223	0.00227838	0	0	0	0	0	0	0	0	0	0	0	0	0	0.0120223	0	0	0	0	0	0	0	0	0	0	0	0	0	0
ASV_358	d__Bacteria	p__Bacteroidota	c__Bacteroidia	o__Cytophagales	f__Hymenobacteraceae	g__Hymenobacter		0.0128527	0.00227838	0	0	0	0	0.000118346	0	0	0	0	0	0	0	0	8.19874e-05	0	0	0	0	0	0	0	0.00032129	0.0123311	0	0	0	0	0
ASV_359	d__Bacteria	p__Patescibacteria	c__Parcubacteria	o__Candidatus_Kaiserbacteria	f__Candidatus_Kaiserbacteria	g__Candidatus_Kaiserbacteria		0.0228463	0.00227838	0	0	0	0	2.4989e-05	0	0	0	0	0	0	0	0	0	0	0	0	0	0	0	3.59648e-05	0	0.0227394	0	0	0	4.59608e-05	0
ASV_360	d__Bacteria	p__Proteobacteria	c__Gammaproteobacteria	o__Burkholderiales	f__Rhodocyclaceae			0.023731	0.00227838	0	0	0	0	0	7.65421e-05	0.023075	0.000135237	7.98642e-05	0	0	0	0	0	0.000234555	0	0	0	0	6.50601e-05	0	0	0	0	0	0	0	6.47445e-05
ASV_361	d__Bacteria	p__Campilobacterota	c__Campylobacteria	o__Campylobacterales	f__Sulfurimonadaceae	g__Sulfurimonas		0.00519577	0.00227838	0.00106475	0.00121363	0.00104253	8.72956e-05	0.00166122	0.000112562	0	9.01578e-05	0.000509788	0.000316756	8.05464e-05	0	0	0.000129402	0.000196402	1.17766e-05	3.03e-05	0.000477803	0	0	8.99119e-05	0	0	0	6.32501e-05	0	0.000296064	0
ASV_362	d__Bacteria	p__Proteobacteria	c__Alphaproteobacteria	o__Rhodobacterales	f__Rhodobacteraceae	g__Paracoccus		0.032517	0	0	0	0.0319134	0	4.72015e-05	0	0	0	0	0.000466607	0	8.97872e-05	0	0	0	0	0	0	0	0	0	0	0	0	0	0	0	0
ASV_363	d__Bacteria	p__Desulfobacterota	c__Desulfobaccia	o__Desulfobaccales	f__Desulfobaccaceae	g__Desulfobacca	s__uncultured_bacterium	0.00088633	0	0	0	0	0	0	0	0	0.000138083	0	0	0	0	0	0	0	9.30001e-05	0.000175177	0.000237918	0	0	0.000116885	0	0	0	6.3985e-05	0	6.12811e-05	0
ASV_364	d__Archaea	p__Halobacterota	c__Methanosarcinia	o__Methanosarciniales	f__Methanosaetaceae	g__Methanosaeta		0.0226333	0	0	0	0	0.000542652	0	0	0	0.00012021	0	0	0	0	0	0.0038944	0.016778	0	0	0	0	0	0.000212086	0	0	0	0	0	0.00108587	0
ASV_365	d__Bacteria	p__Proteobacteria	c__Gammaproteobacteria	o__Burkholderiales	f__Oxalobacteraceae	g__Noviherbaspirillum		0.000256048	0	0	0	0	0	0	0	0	0	0	0	0	0.000114728	0	0	0	0.000141319	0	0	0	0	0	0	0	0	0	0	0	0
ASV_366	d__Bacteria	p__Proteobacteria	c__Gammaproteobacteria	o__Burkholderiales	f__Methylophilaceae			0.01169	0.00978369	0	0	0	0	0	0	0	0	0	0	0	0	0	0	0	0	0	0	0	0	0	0	0	0	0	0	0	0.01169
ASV_367	d__Bacteria	p__Proteobacteria	c__Gammaproteobacteria	o__Xanthomonadales	f__Xanthomonadaceae	g__Stenotrophomonas		0.0238975	0.00978369	0	0	0	0	0.000249842	9.4552e-05	0	0.000450789	0	0	0	0	0	0.000193256	0	0	0	0	0.00150759	0.000520692	0.0198339	0	0.000228357	0	0.000260907	0	0.00055761	0
ASV_371	d__Bacteria	p__Proteobacteria	c__Gammaproteobacteria	o__Burkholderiales	f__Comamonadaceae			0.014116	0.00978369	0	0	0	0	0	0	0	0	0	0	0	8.4799e-05	0.000384189	0	0.013647	0	0	0	0	0	0	0	0	0	0	0	0	0
ASV_372	d__Bacteria	p__Proteobacteria	c__Gammaproteobacteria	o__Xanthomonadales	f__Xanthomonadaceae	g__Lysobacter		0.00315403	0.00978369	0	0	0.00137718	0.000545796	0.000146845	0	0	0	9.98303e-05	0	0	0	0	0	0.000451068	0	0	0.000292512	0	0	0	0	0	0	0	0.00017605	0	6.47445e-05
ASV_373	d__Bacteria	p__Proteobacteria	c__Alphaproteobacteria	o__Caulobacterales	f__Caulobacteraceae	g__Caulobacter		0.022587	0.0151155	0	0	0.000581069	0	0	0.000135074	0	0	0	0.000426033	0	0.00016461	0	0	0	0.000264974	0	0	0	0	0	0.0210153	0	0	0	0	0	0
ASV_374	d__Bacteria	p__Actinobacteriota	c__Actinobacteria	o__Streptomycetales	f__Streptomycetaceae	g__Streptomyces		0.0081167	0.0151155	0	0	0	0.000298459	0	0	0	0	0	0	0.000271362	0	0	0	0	0.000135431	0.00716769	0.00024376	0	0	0	0	0	0	0	0	0	0
ASV_375	d__Bacteria	p__Actinobacteriota	c__Actinobacteria	o__Pseudonocardiales	f__Pseudonocardiaceae	g__Saccharopolyspora		0.00853624	0.0151155	0	0	0	0	0	0	0	0	0	0.000486894	0	0.00739274	0	0.000183503	0.000378897	9.4213e-05	0	0	0	0	0	0	0	0	0	0	0	0
ASV_376	d__Bacteria	p__Patescibacteria	c__Parcubacteria	o__Candidatus_Kaiserbacteria	f__Candidatus_Kaiserbacteria	g__Candidatus_Kaiserbacteria		0.0223669	0.0151155	0	0	0	0	0	0	0	0	0	0	0	0	0	0	0	0	0	0	0	0	0	0.000337952	0.0219543	0	7.46491e-05	0	0	0
ASV_377	d__Bacteria	p__Patescibacteria	c__Saccharimonadia	o__Saccharimonadales	f__Saccharimonadales	g__Saccharimonadales	s__uncultured_bacterium	0.0136709	0.0151155	0	0	0.000180332	0	0	0	0	0	0	0.000121724	0	6.48463e-05	0	0	0	0.000100101	0	0	3.14465e-05	0	0	5.84163e-05	0	0.0130904	2.37188e-05	0	0	0
ASV_378	d__Bacteria	p__Proteobacteria	c__Gammaproteobacteria	o__Pseudomonadales	f__Pseudomonadaceae	g__Pseudomonas		0.0110794	0.0151155	0	0	0	0	0	0	0	0	0	0	0	6.98345e-05	0.000320157	0.00214144	0.000144342	0	0	0	0	0	0	0	0	0	0	0	0.000137882	0.00826571
ASV_379	d__Bacteria	p__Bacteroidota	c__Bacteroidia	o__Cytophagales	f__Spirosomaceae	g__Dyadobacter		0.00979369	0.0151155	0	0	0	0.000325591	0.000347442	0	0.000110644	0	0	0	0.000150757	0	0.0010734	0	0	0	6.62948e-05	0	0	0.000195988	0	0.000506928	0	0	0.00701665	0	0	0
ASV_380	d__Bacteria	p__Planctomycetota	c__Planctomycetes	o__Planctomycetales	f__Rubinisphaeraceae	g__SH-PL14	s__uncultured_bacterium	0.0142418	0.0151155	0	0	0	0	1.66594e-05	0	0	0	0	0	0	0	0	9.42644e-05	0	0	0	0	0.000374309	0	0.0137565	0	0	0	0	0	0	0
ASV_381	d__Bacteria	p__Proteobacteria	c__Gammaproteobacteria	o__Burkholderiales	f__Comamonadaceae	g__Polaromonas		0.00389517	0.0151155	0	0	0	0	0.000569195	0	0	0	0	0	0	0.00295364	0	0	0	0.00037234	0	0	0	0	0	0	0	0	0	0	0	0
ASV_382	d__Bacteria	p__Proteobacteria	c__Alphaproteobacteria	o__Sphingomonadales	f__Sphingomonadaceae			0.012141	0.0151155	0	0	0	0	0	0	0	0	0	0	0	0	0	0	0.000559324	0	0	0	0.000165094	0	0	0	0	0	0	0.00059857	0.00145882	0.00935917
ASV_383	d__Bacteria	p__Elusimicrobiota	c__Lineage_IIb	o__Lineage_IIb	f__Lineage_IIb	g__Lineage_IIb	s__uncultured_bacterium	0.0225888	0.0151155	0	0	0	0	0	0	0	0	0	0.000263734	0	6.48463e-05	0	0	0	0.000100101	0	0	0.000125786	0	0	0.0218936	6.29951e-05	7.77645e-05	0	0	0	0
ASV_384	d__Bacteria	p__Proteobacteria	c__Gammaproteobacteria	o__Burkholderiales	f__Comamonadaceae	g__Tepidimonas		0.0158498	0.0151155	0	0	0	0.000189928	0	0	0	0	0.000149745	0	0	0	0	0	0	0	0	0.0124155	0.000330189	0.00260129	0.000163143	0	0	0	0	0	0	0
ASV_385	d__Bacteria	p__Bacteroidota	c__Bacteroidia	o__Flavobacteriales	f__Weeksellaceae	g__Chryseobacterium		0.00108694	0.0151155	0	0	0.000240442	0	0	0	0	0	0	0.000202873	0	8.97872e-05	0	0	0	0.000164873	0	0	0.000172956	0	0	0	0	0.000216013	0	0	0	0
ASV_386	d__Bacteria	p__Acidobacteriota	c__Acidobacteriae	o__Acidobacteriales	f__Acidobacteriaceae_(Subgroup_1)	g__Occallatibacter		0.024926	0.0151155	0	0	0	4.36478e-05	0	0	0	0	0	0.000522569	0.0240834	0	0.000149407	0	0	0	0.000101	0	0	2.6024e-05	0	0	0	0	0	0	0	0
ASV_388	d__Bacteria	p__Proteobacteria	c__Alphaproteobacteria	o__Sphingomonadales	f__Sphingomonadaceae	g__Sphingobium		0.000713674	0.0151155	0.00504896	0.00473473	0	0	0	0	0.000492476	6.01052e-05	0	0	0.000161093	0	0	0	0	0	0	0	0	0	0	0	0	0	0	0	0	0
ASV_389	d__Bacteria	p__Actinobacteriota	c__Actinobacteria	o__Propionibacteriales	f__Nocardioidaceae	g__Nocardioides	s__uncultured_bacterium	0.030962	0.00533181	0	0	0	0	0	0	0	0.000207125	0	0	0	0	0	8.70133e-05	0	0	0	0	0	0	9.89031e-05	0.013297	0.0171877	0	0	0	8.42615e-05	0
ASV_390	d__Bacteria	p__Actinobacteriota	c__Actinobacteria	o__Actinomycetales	f__Actinomycetaceae	g__Actinomyces		0.00965117	0.00540824	0	0	0	0	0	0	0	0	0	0	0	1.12878e-05	4.05055e-05	0.00675803	0	3.47234e-05	0.00277965	0	0	0	2.69736e-05	0	0	0	0	0	0	0
ASV_391	d__Bacteria	p__Proteobacteria	c__Alphaproteobacteria	o__Acetobacterales	f__Acetobacteraceae	g__Roseomonas		0.0123789	0.00540824	0	0	0	0	0	0	0	0	0	0	0	0	0.00132516	0	0	8.15691e-05	0.0106085	9.75039e-05	0	0	0	0	0	0	0	0	0	0.000266172
ASV_392	d__Bacteria	p__Campilobacterota	c__Campylobacteria	o__Campylobacterales	f__Sulfurimonadaceae	g__Sulfurimonas	s__uncultured_bacterium	0.00219266	0.00540824	0.00184214	0.00348967	0	0.00010853	0.000449803	0	0	0.000345209	0.000634346	0	0.000161093	0	0	0	0	0	0	0.000282795	0	0	6.29383e-05	0	0	0	0.000117306	0	3.06405e-05	0
ASV_393	d__Bacteria	p__Actinobacteriota	c__Actinobacteria	o__Streptomycetales	f__Streptomycetaceae	g__Streptomyces		0.0140273	7.64386e-05	0	0	0	0	0	0	0	0	0	0	0	0	0	4.35066e-05	0	0	0	0	0.000638738	5.20481e-05	0.013229	0	0	0	6.3985e-05	0	0	0
ASV_394	d__Bacteria	p__Actinobacteriota	c__Rubrobacteria	o__Rubrobacterales	f__Rubrobacteriaceae	g__Rubrobacter	s__uncultured_bacterium	0.0119506	7.64386e-05	0	0	0	0	0	1.80099e-05	0	0	0	8.11491e-05	0	0	0	0	0	8.24363e-05	0	0	0.0111399	0.000181573	0.000447525	0	0	0	0	0	0	0
ASV_395	d__Bacteria	p__Proteobacteria	c__Gammaproteobacteria	o__Methylococcales				0.00868992	7.64386e-05	0	0	0.00032059	0	0	4.05223e-05	0	0	0	0.000182585	0	0.00676046	0.000548393	0.000129679	0.000519103	7.06597e-05	0	0	0.000117925	0	0	0	0	0	0	0	0	0
ASV_397	d__Bacteria	p__Proteobacteria	c__Gammaproteobacteria	o__Legionellales	f__Legionellaceae	g__Legionella	s__uncultured_bacterium	0.0116029	7.64386e-05	0	0	0	0	3.33187e-05	0	0	0.000586854	0	0	0	0	0	8.70133e-05	0	0	0	0	0	0	8.09207e-05	0	7.00967e-05	0	0	0	0.0106296	0.000115101
ASV_398	d__Bacteria	p__Actinobacteriota	c__Actinobacteria	o__Micrococcales	f__Intrasporangiaceae			0.0102682	7.64386e-05	0	0	0	0	0	0	0	0	0	0	0	0	0	0	0	0	0.00333842	0	0.000149371	0	0.00671642	0	0	0	6.3985e-05	0	0	0
ASV_399	d__Bacteria	p__Firmicutes	c__Bacilli	o__Staphylococcales	f__Staphylococcaceae	g__Staphylococcus		0	7.64386e-05	0	0	0	0	0	0	0	0	0	0	0	0	0	0	0	0	0	0	0	0	0	0	0	0	0	0	0	0
ASV_400	d__Bacteria	p__Actinobacteriota	c__Rubrobacteria	o__Rubrobacterales	f__Rubrobacteriaceae	g__Rubrobacter	s__uncultured_bacterium	0.00745091	7.64386e-05	0	0	0	0	0	0	0.000184407	0	0	0	0.000180908	0	0	0	0	5.61118e-05	0.00677531	0.000254169	0	0	0	0	0	0	0	0	0	0
ASV_403	d__Bacteria	p__Proteobacteria	c__Gammaproteobacteria	o__Pasteurellales	f__Pasteurellaceae	g__Haemophilus	s__uncultured_bacterium	0.0193037	7.64386e-05	0	0	0	0	2.22125e-05	0	0	0.000195342	0	0	0	0	0	0	0.000144342	0	0	0	0.000350724	0.000118511	0.0108427	0	0.000102367	0	0	0.00374987	0.00372005	5.75506e-05
ASV_404	d__Archaea	p__Nanoarchaeota	c__Nanoarchaeia	o__Woesearchaeales	f__Woesearchaeales	g__Woesearchaeales		0.020417	7.64386e-05	0	0	0	0	8.32968e-06	0	0	0	0	0	0	0	0	0	0	0	0	0	0	0	4.49559e-05	0	0.0203254	0	0	0	3.83007e-05	0
ASV_405	d__Bacteria	p__Proteobacteria	c__Gammaproteobacteria	o__Burkholderiales	f__Hydrogenophilaceae	g__Hydrogenophilus		0.00963839	7.64386e-05	0	0	0	0	0	0.00026096	0.000109439	0.00348661	0	0	6.03027e-05	2.63382e-05	3.03791e-05	0	0	0.00316099	0.00235565	9.42649e-05	0	5.34512e-05	0	0	0	0	0	0	0	0
ASV_407	d__Bacteria	p__Firmicutes	c__Clostridia	o__Peptostreptococcales-Tissierellales	f__Peptostreptococcales-Tissierellales	g__Anaerococcus	s__uncultured_bacterium	0.00911822	7.64386e-05	0	0	0	4.36478e-05	0	0	0.000164159	6.01052e-05	0	0	0	0	0	0	0	0	8.07999e-05	0	7.86164e-05	0.00366288	0.000146829	0	3.93719e-05	3.4562e-05	0.00420926	0.000363204	0.000234783	0
ASV_408	d__Archaea	p__Nanoarchaeota	c__Nanoarchaeia	o__Woesearchaeales	f__SCGC_AAA011-D5	g__SCGC_AAA011-D5		0.0201413	7.64386e-05	0	0	0	0	1.38828e-05	0	0	0.000241646	0	0	0	0	0	8.70133e-05	0	0	0	0	0	0	0.00015285	5.84163e-05	0.0194343	0	0	0	0.000153203	0
ASV_409	d__Bacteria	p__Proteobacteria	c__Gammaproteobacteria	o__Burkholderiales	f__Comamonadaceae			0.00636526	7.64386e-05	0	0	0	0	0	0	0	0	0	0	0	0	0	0	0	0.00636526	0	0	0	0	0	0	0	0	0	0	0	0
ASV_410	d__Bacteria	p__Patescibacteria	c__Parcubacteria	o__Candidatus_Nomurabacteria	f__Candidatus_Nomurabacteria	g__Candidatus_Nomurabacteria		0.0127801	7.64386e-05	0	0	6.01106e-05	0	0	0	0	0	0	0.000121724	0	2.99291e-05	0	0	0	0	0	0	1.57233e-05	0	0	8.76245e-05	0	0.01233	8.2188e-05	5.2815e-05	0	0
ASV_411	d__Bacteria	p__Proteobacteria	c__Alphaproteobacteria	o__Acetobacterales	f__Acetobacteraceae	g__Roseomonas		0.0132053	7.64386e-05	0	0	0	0	0	0	0	0	0	0	0	1.50504e-05	0.000128063	0.00212471	0	0	0	0	0.00208333	0	0	0	0	4.32025e-05	0.00881099	0	0	0
ASV_412	d__Bacteria	p__Bacteroidota	c__Bacteroidia	o__Flavobacteriales	f__Flavobacteriaceae	g__Flavobacterium		0.0206478	7.64386e-05	0	7.64386e-05	0.000400737	0	0	0	0	0	0	0.000202873	0	7.48227e-05	0	0	0	0.000123655	0	0	7.07547e-05	0	0	0.0195549	0.000168232	5.1843e-05	0	0	0	0
ASV_413	d__Bacteria	p__Proteobacteria	c__Gammaproteobacteria	o__Burkholderiales	f__Comamonadaceae			0	0	0	0	0	0	0	0	0	0	0	0	0	0	0	0	0	0	0	0	0	0	0	0	0	0	0	0	0	0
ASV_414	d__Bacteria	p__Firmicutes	c__Clostridia	o__Peptostreptococcales-Tissierellales	f__Peptostreptococcales-Tissierellales	g__Anaerococcus	s__uncultured_bacterium	0.0142196	0	0	0	0	0	0	0	0.000109439	0	0	0	9.66557e-05	0	0	0	0	0.000131447	0.013635	0.000162507	0	8.45782e-05	0	0	0	0	0	0	0	0
ASV_415	d__Bacteria	p__Bacteroidota	c__Bacteroidia	o__Bacteroidales	f__Williamwhitmaniaceae	g__Acetobacteroides		0.0157644	0	0	0	0	0	0	0	0	0	0	0	0	0	6.40314e-05	0	0	0.000260899	0.0124028	0	0	2.6024e-05	0	0	0	0	0.000339969	0	0.00267066	0
ASV_417	d__Bacteria	p__Firmicutes	c__Thermoanaerobacteria	o__Thermoanaerobacterales	f__Family_III	g__Thermoanaerobacterium		0.0205962	0.0177385	0	0	0.000572105	0.0189884	0.000132229	0	0.000191518	0	0	0	0.000161093	0	0.000192094	0	0	0	0.0002222	0	0	0.000136626	0	0	0	0	0	0	0	0
ASV_418	d__Bacteria	p__Patescibacteria	c__Parcubacteria	o__Parcubacteria	f__Parcubacteria	g__Parcubacteria	s__uncultured_bacterium	0.011002	0.0177385	0	0	0	0	0	0	0	0	0	0	0	0	0	5.80088e-05	0	0	0	0	0	0	8.09207e-05	0	9.81354e-05	0	0	0	0.010765	0
ASV_419	d__Bacteria	p__Proteobacteria	c__Alphaproteobacteria	o__Rhizobiales	f__Rhizobiaceae	g__Allorhizobium-Neorhizobium-Pararhizobium-Rhizobium		0.0132314	0.0177385	0	0	0	0	0	0.000608907	0	0	0.000159052	0.000316756	0	9.40649e-05	0	0	0	4.84042e-05	0	0	0.000711807	0	0	0.00084488	0	0.0102538	0	0.000193655	0	0
ASV_420	d__Bacteria	p__Bacteroidota	c__Bacteroidia	o__Flavobacteriales	f__Weeksellaceae	g__Chryseobacterium		0.00168375	0.0177385	0	0	0	0	0	0	0	0	0	0	0	0	0.000149407	0	0	0	0	0	0	0	0	0	0	0	0	0.00153434	0	0
ASV_421	d__Bacteria	p__Proteobacteria	c__Gammaproteobacteria	o__Burkholderiales	f__Methylophilaceae			0.0306497	0.0177385	0	0	0	0	0	0	0	0	0	0	0	0	0.0306497	0	0	0	0	0	0	0	0	0	0	0	0	0	0	0
ASV_422	d__Bacteria	p__Proteobacteria	c__Gammaproteobacteria	o__Burkholderiales	f__Comamonadaceae			0.000654032	0.0177385	0	0	0	0	0	0	0	0	0	0.00044632	0	8.97872e-05	0	0	0	0	0	0	0.000117925	0	0	0	0	0	0	0	0	0
ASV_423	d__Bacteria	p__Firmicutes	c__Bacilli	o__Staphylococcales	f__Staphylococcaceae	g__Staphylococcus		0	0.0177385	0	0	0	0	0	0	0	0	0	0	0	0	0	0	0	0	0	0	0	0	0	0	0	0	0	0	0	0
ASV_424	d__Archaea	p__Crenarchaeota	c__Nitrososphaeria	o__Nitrososphaerales	f__Nitrososphaeraceae	g__Nitrososphaeraceae		0.0219104	0.0177385	0	0	0	0	0	0	0.0157045	0.000360631	9.08868e-06	0	0	0	0.000362845	0.00404666	0	0	0	0	0	0	0.00115831	0	0.000110241	0	0.000158125	0	0	0
ASV_425	d__Bacteria	p__Bacteroidota	c__Bacteroidia	o__Cytophagales	f__Cytophagaceae	g__Cytophaga	s__uncultured_bacterium	0.0109157	0.0177385	0	0	0	0	0	0	0	0	0	0	0	0	0	0	0	0	0	0	0	0	0	0	0	0	0	0	0.0109157	0
ASV_426	d__Bacteria	p__Bacteroidota	c__Bacteroidia	o__Flavobacteriales	f__Weeksellaceae	g__Chryseobacterium		0.0149689	0.0177385	0	0	0	0	0	0	0	0	0	0	0	0	0	5.07577e-05	0	0	0	0	0	0	0	0	0	0.000112327	0.0144713	0.000334495	0	0
ASV_427	d__Bacteria	p__Firmicutes	c__Bacilli	o__Staphylococcales	f__Staphylococcaceae	g__Staphylococcus		0.0143218	0.0177385	0	0	0	0	0	0	0	0	0	0	0	0	0	0	0	0	0.0143218	0	0	0	0	0	0	0	0	0	0	0
ASV_428	d__Bacteria	p__Proteobacteria	c__Gammaproteobacteria	o__Pseudomonadales	f__Moraxellaceae	g__Acinetobacter		0.015105	0.0177385	0	0	0	0.000569785	0	4.95272e-05	0.0099764	0.000207125	0	0	0.000572876	0	0.000212654	0	0	0	0	0	0	0	0	0	0	0.00351668	0	0	0	0
ASV_429	d__Bacteria	p__Proteobacteria	c__Alphaproteobacteria	o__Sphingomonadales	f__Sphingomonadaceae	g__Sphingomonas		0.000865387	0.0177385	0	0	0	0	0	0	0	0	0	0	0	0	0	0	0.00019847	0	0	0.00024376	0	0	0	0.000131437	0.00029172	0	0	0	0	0
ASV_430	d__Bacteria	p__Firmicutes	c__Negativicutes	o__Veillonellales-Selenomonadales	f__Veillonellaceae	g__Veillonella	s__uncultured_bacterium	0.0137999	0.0177385	0	0	0	0	0	0	0	0	0	0	0	0	0.013144	0.000655899	0	0	0	0	0	0	0	0	0	0	0	0	0	0
ASV_431	d__Bacteria	p__Proteobacteria	c__Gammaproteobacteria	o__Aeromonadales	f__Aeromonadaceae	g__Aeromonas		0.00922364	0.0177385	0	0	0.000480885	0	0	0	0	0	0	0.000649193	0	0.000119716	0	0	0	0.00706415	0.000295118	0.000424483	0	0	0	0	0	0.000190091	0	0	0	0
ASV_432	d__Bacteria	p__Proteobacteria	c__Alphaproteobacteria	o__Rhodobacterales	f__Rhodobacteraceae			0.0256151	0.0177385	0	0	0	0	0	0	0	0	8.63424e-05	0	0	0	0	0	0	0	8.05008e-05	0.0254482	0	0	0	0	0	0	0	0	0	0
ASV_433	d__Bacteria	p__Bacteroidota	c__Bacteroidia	o__Chitinophagales	f__Chitinophagaceae	g__Sediminibacterium		0.0192916	0.0177385	0	0	0	0.000217061	0	0	0.000147525	0	0	0	6.03027e-05	0	8.1011e-05	0	0	0.00041702	0.00116489	0.000113118	0.000366447	0.0164729	0.000251387	0	0	0	0	0	0	0
ASV_434	d__Bacteria	p__Firmicutes	c__Bacilli	o__Staphylococcales	f__Staphylococcaceae	g__Staphylococcus		0.0141905	0.0177385	0	0	0	0	0	0	0	0	0	0	0	0	0	0	0	0	0.0141905	0	0	0	0	0	0	0	0	0	0	0
ASV_435	d__Bacteria	p__Proteobacteria	c__Gammaproteobacteria	o__Burkholderiales	f__Comamonadaceae			0	0.0177385	0.00558223	0.0121563	0	0	0	0	0	0	0	0	0	0	0	0	0	0	0	0	0	0	0	0	0	0	0	0	0	0
ASV_436	d__Bacteria	p__Bacteroidota	c__Bacteroidia	o__Flavobacteriales	f__Weeksellaceae	g__Chryseobacterium		0.0174762	0	0	0	0	0.000189928	0	0	0	0	8.63424e-05	0.000263734	0.0110957	0	4.05055e-05	0	0	0.00579999	0	0	0	0	0	0	0	0	0	0	0	0
ASV_437	d__Bacteria	p__Proteobacteria	c__Gammaproteobacteria	o__Burkholderiales	f__Methylophilaceae			0.022373	0.00647062	0	0	0	0	0	0	0	0	0	0	0	0	0	0	0.022373	0	0	0	0	0	0	0	0	0	0	0	0	0
ASV_438	d__Bacteria	p__Bacteroidota	c__Bacteroidia	o__Cytophagales	f__Hymenobacteraceae	g__Hymenobacter	s__uncultured_bacterium	0.0131325	0.00647062	0	0	0	0	0	0	0	0	0	0	0	0	0	0	0	0	0	0	0	0	0	0.00203399	0.0102474	0	0	0	0.000851089	0
ASV_439	d__Bacteria	p__Actinobacteriota	c__Actinobacteria	o__Propionibacteriales	f__Nocardioidaceae	g__Nocardioides	s__uncultured_bacterium	0.027571	0.00647062	0	0	0	0	0	0	0	0	0	0.0270979	0.000402304	0	0	0	0	0	0	0	7.07547e-05	0	0	0	0	0	0	0	0	0
ASV_440	d__Bacteria	p__Bacteroidota	c__Bacteroidia	o__Flavobacteriales	f__Weeksellaceae	g__Chryseobacterium		0.00467314	0.00647062	0	0	0	0.000352724	7.21905e-05	0	0.000165966	0.000517813	0	0.00022316	0.000693481	0	0.000131643	0.000188529	0	0.000238297	5.20888e-05	0	0	0.000570146	0.000341665	0.000277478	0.000602832	0	0	0	0.000245124	0
ASV_441	d__Bacteria	p__Cyanobacteria	c__Cyanobacteriia	o__Oxyphotobacteria_Incertae_Sedis	f__Unknown_Family	g__CENA359		0.0061065	0.00647062	0	0	0	0	0	0	0	0	0	0.000277162	0	3.7626e-05	0	0	0	0.00499307	0	0.000113755	0.000177952	0	0	0.000506928	0	0	0	0	0	0
ASV_442	d__Bacteria	p__Chloroflexi	c__Dehalococcoidia	o__SAR202_clade	f__SAR202_clade	g__SAR202_clade		0.00210034	0.00647062	0	0	0	0	0	0	0	0	4.99151e-05	0	0	0	0	0	0	0	0	0.000178757	0	0	0	0.00164075	0.000209334	0	0	0	0	2.15815e-05
ASV_445	d__Bacteria	p__Chloroflexi	c__JG30-KF-CM66	o__JG30-KF-CM66	f__JG30-KF-CM66	g__JG30-KF-CM66	s__uncultured_bacterium	0.0145729	0.00647062	0	0	0	0	1.11062e-05	0	0	0	0	0	0	0	0.000128063	5.07577e-05	0	0	0	0	0	3.90361e-05	6.29383e-05	0	0	3.4562e-05	0.0141936	5.2815e-05	0	0
ASV_446	d__Bacteria	p__Patescibacteria	c__ABY1	o__Candidatus_Magasanikbacteria	f__Candidatus_Magasanikbacteria	g__Candidatus_Magasanikbacteria		0.0118812	0.00647062	0	0	0	0	0	0	0	0	0	6.08618e-05	0	3.49172e-05	0	0	0	5.29948e-05	0	0	0	0	0	5.84163e-05	0	0.0116388	0	3.521e-05	0	0
ASV_447	d__Bacteria	p__Verrucomicrobiota	c__Omnitrophia	o__Omnitrophales	f__Omnitrophaceae	g__Candidatus_Omnitrophus	s__uncultured_bacterium	0.0125009	0.00647062	0	0	0	0	1.66594e-05	0	0	0	0	0	0	0	0	0	0	0	0	0	0.000489367	2.6024e-05	0.0118707	0	9.81354e-05	0	0	0	0	0
ASV_448	d__Bacteria	p__Bdellovibrionota	c__Bdellovibrionia	o__Bdellovibrionales	f__Bdellovibrionaceae	g__Bdellovibrio		0.0241666	0.00647062	0	0	0	0	0	0	0	0	0	0	0	9.97636e-06	4.05055e-05	3.51374e-05	0.0239066	0	0	0	0	0	0	0	0	0	0	8.80251e-05	0	8.6326e-05
ASV_449	d__Bacteria	p__Patescibacteria	c__Saccharimonadia	o__Saccharimonadales	f__Saccharimonadales	g__Saccharimonadales	s__uncultured_bacterium	0.000801928	0.00682089	0	0	0	0	0	0	0	0	8.98473e-05	0	0	0	0	0	0.000162385	0	0	0.000195008	0	0	0	5.84163e-05	0.000133092	0	0	0.00010563	0	5.75506e-05
ASV_450	d__Bacteria	p__Bacteroidota	c__Bacteroidia	o__Flavobacteriales	f__Weeksellaceae	g__Chryseobacterium		0.0020828	0.0210897	0	0	0.000652253	0.000337387	5.25984e-05	0	0	0	0.000109813	0	0	0	0	0	0.000180427	0	0	0.000357514	0	0	0	0	0	0	0	0.000299285	0	9.35198e-05
ASV_451	d__Bacteria	p__Actinobacteriota	c__Actinobacteria	o__Corynebacteriales	f__Mycobacteriaceae	g__Mycobacterium		0.0132225	0.0210897	0	0	0	0	0	0	0.000328317	0	0	0	0.000161093	0	0	0	0	0	0.0001717	0	0	0	0	0.0124983	6.29951e-05	0	0	0	0	0
ASV_452	d__Bacteria	p__Actinobacteriota	c__Actinobacteria	o__Micrococcales	f__Microbacteriaceae	g__Microbacterium		0.0128106	0.0210897	0	0	0	0	0	0	0	0	0	0	0.00283523	0	0	0.00114567	0	0	0	0	0.00535377	0	0.00153354	0.00194234	0	0	0	0	0	0
ASV_453	d__Bacteria	p__Bacteroidota	c__Bacteroidia	o__Cytophagales	f__Spirosomaceae	g__Spirosoma		0.0117347	0.0210897	0	0	0.000117233	8.13979e-05	0	0	0	0	0	0	0.000386623	7.52519e-06	0	0	0	1.48936e-05	0.00367936	0	0.000133464	0	0	0	0	0.00731422	0	0	0	0
ASV_454	d__Bacteria	p__Proteobacteria	c__Gammaproteobacteria	o__Burkholderiales	f__Oxalobacteraceae			0.00286722	0.0210897	0	0	0	0	0.00102177	0.00141828	0	0	0.000427168	0	0	0	0	0	0	0	0	0	0	0	0	0	0	0	0	0	0	0
ASV_456	d__Bacteria	p__Proteobacteria	c__Gammaproteobacteria	o__Pseudomonadales	f__Pseudomonadaceae	g__Pseudomonas		0.00422247	0.0210897	0	0	0	0	0.000360953	0	0	0	0	0	0	0.00217854	0	0	0	0.00168298	0	0	0	0	0	0	0	0	0	0	0	0
ASV_459	d__Bacteria	p__Proteobacteria	c__Gammaproteobacteria	o__Enterobacterales	f__Enterobacteriaceae	g__Escherichia-Shigella	s__Escherichia_coli	0	0.0210897	0	0	0	0	0	0	0	0	0	0	0	0	0	0	0	0	0	0	0	0	0	0	0	0	0	0	0	0
ASV_460	d__Bacteria	p__Proteobacteria	c__Alphaproteobacteria	o__Azospirillales	f__Azospirillaceae	g__Skermanella	s__uncultured_bacterium	0.0084026	0.0210897	0.00161801	0.00485261	0	0	0	0	8.20793e-05	0	0	0	0	0	0	0	0	0	0	0	5.50314e-05	0.00294072	9.95538e-05	0	0	0	0	0	0.00522522	0
ASV_461	d__Bacteria	p__Patescibacteria	c__Parcubacteria					0.0181957	0.0146191	0	0	0	0	0	0	0	0	0	0	0	0	0	0	0	0	0	0	0	0	0.00015285	0	0.0180429	0	0	0	0	0
ASV_462	d__Bacteria	p__Bacteroidota	c__Bacteroidia	o__Cytophagales	f__Microscillaceae	g__uncultured		0.00282665	0.0146191	0	0	0	0	5.25984e-05	0	0	3.00526e-05	0	0	0	0	0	1.75687e-05	0.000117841	0.00238323	7.8912e-05	7.54119e-05	0	0	0	0	3.14976e-05	0	3.95313e-05	0	0	0
ASV_463	d__Bacteria	p__Firmicutes	c__Bacilli	o__Bacillales	f__Bacillaceae	g__Bacillus		0.0102242	0.0146191	0	0	0	0	0	4.05223e-05	0	0	0	0	0	0	0	0	0	0.000459288	0	0	0.00944969	0.000202792	7.19295e-05	0	0	0	0	0	0	0
ASV_464	d__Bacteria	p__Firmicutes	c__Bacilli	o__Lactobacillales	f__Streptococcaceae	g__Streptococcus		0.0157633	0.0146191	0	0	0.00920281	0.000116394	0	0	0	0	0	0	0	0	0	0	0	5.29948e-05	0.00639111	0	0	0	0	0	0	0	0	0	0	0
ASV_465	d__Bacteria	p__Proteobacteria	c__Gammaproteobacteria	o__Burkholderiales	f__Comamonadaceae			0.0192044	0.0146191	0	0	0	0	0	0	0	0	0	0	0	0	0	0	0	0	0	0	0	0	0	0.0192044	0	0	0	0	0	0
ASV_466	d__Bacteria	p__Cyanobacteria	c__Cyanobacteriia	o__Cyanobacteriales	f__Chroococcidiopsaceae			0.0256288	0.0146191	0	0	0	0	0	3.15173e-05	0	0	0	0.025562	0	0	0	0	0	3.53299e-05	0	0	0	0	0	0	0	0	0	0	0	0
ASV_467	d__Bacteria	p__Bacteroidota	c__Bacteroidia	o__Bacteroidales	f__Porphyromonadaceae	g__Porphyromonas	s__uncultured_bacterium	0.0132343	0.0280202	0	0	0	0	0	0	0.000164159	0	0	0	0	0	0.000106719	0	0	0	0.0129179	0	0	4.55421e-05	0	0	0	0	0	0	0	0
ASV_468	d__Bacteria	p__Firmicutes	c__Bacilli	o__Bacillales	f__Bacillaceae	g__Bacillus		0.0278964	0.0280202	0	0	0	0	0	0	0	0	0	0	0	0	0.0278964	0	0	0	0	0	0	0	0	0	0	0	0	0	0	0
ASV_469	d__Bacteria	p__Cyanobacteria	c__Cyanobacteriia	o__Cyanobacteriales	f__Chroococcidiopsaceae	g__Aliterella		0.0103697	0.0280202	0	0	0	0	0	0	0	0	0	0	0	1.99527e-05	0	0	0	0	0	0	0.0101465	8.90853e-05	0.0001142	0	0	0	0	0	0	0
ASV_470	d__Bacteria	p__Bacteroidota	c__Bacteroidia	o__Flavobacteriales	f__Flavobacteriaceae	g__Flavobacterium		0.00608864	0.0280202	0.000166485	0.000183777	0	0	0.000807979	0	0	0	0	0	0	0.00231776	0	0	0	0	0	0	0.00288199	0	8.09207e-05	0	0	0	0	0	0	0
ASV_471	d__Bacteria	p__Firmicutes	c__Clostridia	o__Clostridia	f__Hungateiclostridiaceae	g__Ercella		0	0.0276699	0.00933855	0.00493028	0	0	0	0	0	0	0	0	0	0	0	0	0	0	0	0	0	0	0	0	0	0	0	0	0	0
ASV_472	d__Bacteria	p__Firmicutes	c__Bacilli	o__Staphylococcales	f__Staphylococcaceae	g__Staphylococcus		0.00213564	0.0134011	0	0	0	0	0	0	0	0	0	0	0	0	0	0	0	0	0.00213564	0	0	0	0	0	0	0	0	0	0	0
ASV_473	d__Bacteria	p__Proteobacteria	c__Gammaproteobacteria	o__Xanthomonadales	f__Xanthomonadaceae	g__Stenotrophomonas		0.0118566	0.0134011	0	0	0	0	0	0	0	0	0	0	0	0	0	0	0	0	0	0	0.000117925	0	0	0	0	0	0	0	0	0.0117387
ASV_474	d__Bacteria	p__Patescibacteria	c__Parcubacteria					0.000629228	0.0134011	0	0	0	0	1.38828e-05	0	0	0	0	0	0	0	0	0	0	2.97872e-05	0	0.000227509	0	0	3.59648e-05	0	0.000140193	0	7.46491e-05	0	0.000107242	0
ASV_475	d__Bacteria	p__Proteobacteria	c__Gammaproteobacteria	o__Burkholderiales	f__Comamonadaceae			0.0186932	0.0134011	0	0	0	0	0	0	0	0	0	0	0	0	0	0	0	0	0	0	0	0	0	0.0186932	0	0	0	0	0	0
ASV_476	d__Bacteria	p__Proteobacteria	c__Gammaproteobacteria	o__Burkholderiales	f__Methylophilaceae			0	0.0134011	0	0	0	0	0	0	0	0	0	0	0	0	0	0	0	0	0	0	0	0	0	0	0	0	0	0	0	0
ASV_477	d__Bacteria	p__Chloroflexi	c__Chloroflexia	o__Thermomicrobiales	f__JG30-KF-CM45	g__JG30-KF-CM45	s__uncultured_bacterium	0.00839599	0.0134011	0	0	0	0	0	0	0	0	0	0	0	0	0.00017075	0	0	0	4.04e-05	0	3.93082e-05	0.00814553	0	0	0	0	0	0	0	0
ASV_479	d__Bacteria	p__Actinobacteriota	c__Actinobacteria	o__Pseudonocardiales	f__Pseudonocardiaceae	g__Pseudonocardia	s__uncultured_bacterium	0.0082301	0.0134011	0	0	0	0	0	0	0	0	0	0	0	0	0	0	0	0	0	0	0	0.0082301	0	0	0	0	0	0	0	0
ASV_480	d__Bacteria	p__Proteobacteria	c__Alphaproteobacteria	o__Rhizobiales	f__Beijerinckiaceae	g__Methylobacterium-Methylorubrum		0.00902876	0.0134011	0	0	0	0	0	0	0.000109439	0	0	0	0	0	0	0	0	0	0	0	0	0.00431999	0.0001142	0	0.00448513	0	0	0	0	0
ASV_481	d__Bacteria	p__Bacteroidota	c__Bacteroidia	o__Sphingobacteriales	f__Sphingobacteriaceae	g__Sphingobacterium	s__uncultured_bacterium	0.000709882	0.0134011	0	0	0	0	0	0	0	0	3.99321e-05	0	0	0	0	0	0	0	0	0.000276261	0	0	0	0.000116833	0.000204918	0	0	0	0	7.19383e-05
ASV_482	d__Bacteria	p__Proteobacteria	c__Alphaproteobacteria	o__Rhodobacterales	f__Rhodobacteraceae	g__Rhodobacter		0.00582248	0.0134011	0	0	0	0	0.0013744	0	0	0.000724938	0.000286293	0	0	0.00343685	0	0	0	0	0	0	0	0	0	0	0	0	0	0	0	0
ASV_483	d__Bacteria	p__Firmicutes	c__Bacilli	o__Bacillales	f__Bacillaceae	g__Bacillus		0.0132173	0.0134011	0	0	0	0	0	0	0	0	0	0	0	0	0	0	0	0	0	0	0	0	0	0	0	0	0.012918	0.000299285	0	0
ASV_484	d__Bacteria	p__Actinobacteriota	c__Actinobacteria	o__Frankiales	f__Sporichthyaceae	g__hgcI_clade	s__uncultured_bacterium	0.000820497	0.0134011	0	0	0	0	0	0	0.000110644	0	0	0	0.000120605	0	8.1011e-05	0	0	0	6.15594e-05	0	0	8.90853e-05	0	0	0	0.000109513	0.000124845	0.000123235	0	0
ASV_485	d__Bacteria	p__Proteobacteria	c__Alphaproteobacteria	o__Caulobacterales	f__Caulobacteraceae	g__Caulobacter		0.0438874	0.0134011	0	0	0	0	0	0	0	0	8.17981e-05	0	0	0.000136164	0.000578772	0.000203861	0.0422582	0	0	0.000395913	0	0	0	0	0	0	0	0	0	0.000232759
ASV_486	d__Bacteria	p__Proteobacteria	c__Gammaproteobacteria	o__Pseudomonadales	f__Pseudomonadaceae	g__Pseudomonas		0	0.0134011	0.00755375	0.00584736	0	0	0	0	0	0	0	0	0	0	0	0	0	0	0	0	0	0	0	0	0	0	0	0	0	0
ASV_487	d__Bacteria	p__Verrucomicrobiota	c__Verrucomicrobiae	o__Chthoniobacterales	f__Terrimicrobiaceae	g__Terrimicrobium	s__uncultured_bacterium	0.00642203	0	0	0	0.000234467	0.000217061	0	8.69868e-05	0	0	0	0.000197973	0	0	4.05055e-05	2.90044e-05	0	1.8617e-05	0	0	8.89759e-05	3.25301e-05	0.00513796	0.000337952	0	0	0	0	0	0
ASV_488	d__Archaea	p__Crenarchaeota	c__Bathyarchaeia	o__Bathyarchaeia	f__Bathyarchaeia	g__Bathyarchaeia	s__uncultured_archaeon	0.00367811	0	0	0	0	0	0	0	0	0	0	0	0	0	0.000533595	0.00301011	0	0	0	0	0	0	0	0	0	0	0.000134406	0	0	0
ASV_489	d__Bacteria	p__Cyanobacteria	c__Cyanobacteriia	o__Cyanobacteriales	f__Nostocaceae	g__Nodularia_PCC-9350		0.00067557	0	0	0	0	0	0	0	0	0	0	0	0.000120605	0	0.000162022	0	0	0	9.47068e-05	0	0	0.000160353	0	0	0	0	0	0	0.000137882	0
ASV_490	d__Bacteria	p__Actinobacteriota	c__Thermoleophilia	o__Solirubrobacterales	f__67-14	g__67-14		0.0106168	0	0	0	0	0	0	3.60198e-05	0	0	0	6.08618e-05	0	2.49409e-05	0	0	0	4.71065e-05	0	0	0	0	0	0	0	0.0103945	5.33208e-05	0	0	0
ASV_491	d__Bacteria	p__Proteobacteria	c__Alphaproteobacteria	o__Rhizobiales	f__Rhizobiaceae	g__Allorhizobium-Neorhizobium-Pararhizobium-Rhizobium		0.00826034	0	0	0	0	0	0	0	0	0	0	0	0	4.13885e-05	0.000341501	0.0064798	0.00110399	0	0	0	0	0	0.000293657	0	0	0	0	0	0	0
ASV_492	d__Bacteria	p__Firmicutes	c__Clostridia					0.00604024	0	0	0	0	0	0	0	0.000165966	0	0	0	0	0	7.08846e-05	0	0	2.35532e-05	0.00555297	0.000226872	0	0	0	0	0	0	0	0	0	0
ASV_493	d__Bacteria	p__Campilobacterota	c__Campylobacteria	o__Campylobacterales	f__Sulfurimonadaceae	g__Sulfurimonas	s__uncultured_bacterium	0.00326113	0	0	0	0	0	0.000790274	0	0	0.000165289	0	0.000380558	0.000542724	0.000496663	0	0.000205533	0	0	0	0	0	0	0.000195771	0.000253464	8.41161e-05	0	0	0	0.000146739	0
ASV_494	d__Bacteria	p__Patescibacteria	c__Gracilibacteria	o__Gracilibacteria	f__Gracilibacteria	g__Gracilibacteria	s__uncultured_bacterium	0.016809	0	0	0	0	0	3.05422e-05	0	0	0.000207125	0	0	0	0	0	4.35066e-05	0	0	0	0	0	0	0	0.000102229	0.0164026	0	0	0	2.29804e-05	0
ASV_495	d__Bacteria	p__Proteobacteria	c__Gammaproteobacteria	o__Burkholderiales	f__Methylophilaceae			0	0	0	0	0	0	0	0	0	0	0	0	0	0	0	0	0	0	0	0	0	0	0	0	0	0	0	0	0	0
ASV_496	d__Archaea	p__Crenarchaeota	c__Nitrososphaeria	o__Nitrososphaerales	f__Nitrososphaeraceae			0.010314	0	0	0	0	0	0	0	0	0	0	0	0	0	0	0.00483726	0	0	0	0	0	0	0	0	0	0.00540556	7.11564e-05	0	0	0
ASV_497	d__Archaea	p__Crenarchaeota	c__Bathyarchaeia	o__Bathyarchaeia	f__Bathyarchaeia	g__Bathyarchaeia	s__uncultured_archaeon	0.00715633	0	0	0	0	0	0	0	0	0	0	0	0	0	0	0.00715633	0	0	0	0	0	0	0	0	0	0	0	0	0	0
ASV_498	d__Bacteria	p__Proteobacteria	c__Gammaproteobacteria	o__Burkholderiales	f__Alcaligenaceae	g__Alcaligenes		0.0177047	0	0	0	0	0.000160042	0	0	0.00174053	0	0	0	0	7.52519e-06	0.000256126	0	0	2.60638e-05	9.08999e-05	0	0.000248706	0.00554312	0	0.00963163	0	0	0	0	0	0
ASV_499	d__Bacteria	p__Cyanobacteria	c__Cyanobacteriia	o__Leptolyngbyales	f__Leptolyngbyaceae	g__Phormidesmis_ANT.L52.6	s__uncultured_bacterium	0.00537213	0.00298145	0	0	0.000410317	0	0	0	0	0	0	0.000158378	0	1.12878e-05	0	0	0	0.00435265	0	0	0.000355904	0	0	0	0	8.35911e-05	0	0	0	0
ASV_500	d__Bacteria	p__Proteobacteria	c__Gammaproteobacteria	o__Burkholderiales	f__Methylophilaceae			0.0195406	0.00298145	0	0	0	0	0	0	0	0	0	0	0.0195406	0	0	0	0	0	0	0	0	0	0	0	0	0	0	0	0	0
ASV_501	d__Bacteria	p__Proteobacteria	c__Gammaproteobacteria	o__Burkholderiales	f__Oxalobacteraceae	g__Massilia		0.00729743	0.00298145	0	0	0.000762016	0	0.00543665	0	0	0	0.000109813	0	0	0	0	0	0.000360855	0	0	0.000422517	0	0	0	0	0	0	0	0.00014084	0	6.47445e-05
ASV_503	d__Bacteria	p__Bdellovibrionota	c__Bdellovibrionia	o__Bdellovibrionales	f__Bdellovibrionaceae	g__Bdellovibrio		0.00289388	0.00298145	0	0	0	0	0	0	0	0	5.98982e-05	0	0	0	0	0	0.000180427	0	0	9.75039e-05	0	0	0	0	0.00235444	0	0	0.000158445	0	4.3163e-05
ASV_504	d__Bacteria	p__Proteobacteria	c__Gammaproteobacteria	o__Pseudomonadales	f__Pseudomonadaceae	g__Pseudomonas		0.00759583	0.00298145	0	0	0	0	0	0	0	0	0	0	0	0	0	0	0	0.00411004	0	0	0	0	0	0	0	0	0	0.00348579	0	0
ASV_506	d__Bacteria	p__Proteobacteria	c__Gammaproteobacteria	o__Burkholderiales	f__Methylophilaceae	g__uncultured		0.0294229	0.00298145	0	0	0	0	0	0	0	0.0211613	0	0	0	0	0	0	0	0	0	0	0	0	0	0	0	0.00826158	0	0	0	0
ASV_508	d__Bacteria	p__Proteobacteria	c__Gammaproteobacteria	o__Burkholderiales	f__Comamonadaceae			0.0173557	0.00298145	0	0	0	0	0	0	0	0	0	0	0	0	0	0	0	0	0	0.0173557	0	0	0	0	0	0	0	0	0	0
ASV_509	d__Bacteria	p__Proteobacteria	c__Alphaproteobacteria	o__Sphingomonadales	f__Sphingomonadaceae	g__Novosphingobium		0.00662413	0.0185096	0	0	0.000160295	0	0	0	0	0	0	0	0	0.00556681	0.000282141	5.07577e-05	0.000342812	0	0	0	7.07547e-05	0	6.29383e-05	8.76245e-05	0	0	0	0	0	0
ASV_510	d__Bacteria	p__Bacteroidota	c__Bacteroidia	o__Flavobacteriales	f__Flavobacteriaceae	g__Flavobacterium		0.000276261	0.0185096	0	0	0	0	0	0	0	0	0	0	0	0	0	0	0	0	0	0.000276261	0	0	0	0	0	0	0	0	0	0
ASV_511	d__Bacteria	p__Actinobacteriota	c__Thermoleophilia	o__Gaiellales	f__Gaiellaceae	g__Gaiella	s__uncultured_bacterium	0.000951293	0.0185096	0	0	0	0.000217061	0	0	0.000129085	0	0	0	9.04541e-05	0	0	0	0	0	8.05008e-05	0	0	0.000249439	0	0	0.000184754	0	0	0	0	0
ASV_512	d__Bacteria	p__Proteobacteria	c__Gammaproteobacteria	o__Enterobacterales	f__Enterobacteriaceae	g__Escherichia-Shigella	s__Escherichia_coli	0.00840388	0.0185096	0	0	0	0	0	0	0	0	0	0	0	0	0	0	0	0	0	0	0.000578343	0.00782554	0	0	0	0	0	0	0	0
ASV_513	d__Bacteria	p__Bdellovibrionota	c__Bdellovibrionia	o__Bacteriovoracales	f__Bacteriovoracaceae	g__Peredibacter		0.00245728	0.0185096	0	0	0	0	0	0	0	0	6.98812e-05	6.08618e-05	0	0	0	0	0	0.00138964	0	0.00024376	0	0	0	0.000597689	9.54493e-05	0	0	0	0	0
ASV_514	d__Bacteria	p__Proteobacteria	c__Gammaproteobacteria	o__Run-SP154	f__Run-SP154	g__Run-SP154		0.00167834	0.0185096	0	0	0	0.000130943	0	0	0.000355677	0	0	0	0.000193311	0	0.000384189	0	0	0	0.0003232	0	0	5.85541e-05	0	0	0	0	0	0	0.000132712	9.97539e-05
ASV_515	d__Bacteria	p__Actinobacteriota	c__Actinobacteria	o__Frankiales	f__Geodermatophilaceae	g__Blastococcus	s__uncultured_bacterium	0.0176024	0.0185096	0	0	0	0	0	0	0	0	0	0	0	0	0	0	0	8.83247e-05	0.000200442	0.0171769	0	0	0	0	0	0	0	0	0	0.000136683
ASV_516	d__Bacteria	p__Planctomycetota	c__Planctomycetes	o__Gemmatales	f__Gemmataceae	g__uncultured	s__uncultured_bacterium	0.000175816	0.0185096	0	0	0	0	0	0	0	0	0	0	0	0	0	2.17533e-05	0	0	0	0.000154063	0	0	0	0	0	0	0	0	0	0
ASV_517	d__Bacteria	p__Patescibacteria	c__Parcubacteria					0.00110999	0.0185096	0	0	0	0	0	0	0	0	3.99321e-05	0	0	0	0	0	0.000216513	0	0	0.000146256	0	0	0	0.000609157	9.81354e-05	0	0	0	0	0
ASV_518	d__Bacteria	p__Proteobacteria	c__Alphaproteobacteria	o__Sphingomonadales	f__Sphingomonadaceae	g__Novosphingobium		0.0057085	0.0185096	0	0	0	0	0	0.000304454	0	0.000552334	0.000322648	0	0	0.00359048	0	9.36999e-05	0	0	0	0	0	0	0	0.00084488	0	0	0	0	0	0
ASV_520	d__Bacteria	p__Proteobacteria	c__Gammaproteobacteria	o__Burkholderiales	f__Alcaligenaceae			0.00195814	0.0185096	0	0	0	0	0	0.000810446	0	0	0	0	0	0	0	0.000108767	0	0.000133612	0.000154347	0.000146256	0	0	0.000107894	0	0.000196271	0	0.000223947	0	7.66014e-05	0
ASV_521	d__Bacteria	p__Proteobacteria	c__Gammaproteobacteria	o__Burkholderiales	f__Oxalobacteraceae	g__Massilia		0.00787386	0.0185096	0.000367247	0.0026142	0	0	0	0	0	0	0	0	0	0	0	0	0	0	0	0	0	0.00176389	0	0.000408914	0.00570106	0	0	0	0	0
ASV_522	d__Bacteria	p__Actinobacteriota	c__Actinobacteria	o__Propionibacteriales	f__Propionibacteriaceae	g__Cutibacterium	s__uncultured_bacterium	0.0191221	0.0155281	0	0	0.013064	0	0	0	0.00143837	0	0	0	0	0	0	0	0	0	0	0	0.00146366	0	0.00210454	0	0	0	0.00105153	0	0	0
ASV_523	d__Bacteria	p__Fusobacteriota	c__Fusobacteriia	o__Fusobacteriales	f__Fusobacteriaceae	g__Fusobacterium	s__uncultured_bacterium	0.000890194	0.0155281	0	0	0	0.000271326	0	0	7.37626e-05	0	0	0	0.000150757	0	8.1011e-05	0	0	0	4.73534e-05	0	0	0.000160353	0	0	0	0	0	0.00010563	0	0
ASV_524	d__Bacteria	p__Patescibacteria	c__Parcubacteria					0.00487875	0.0155281	0	0	0.00017585	0	0	0	0	0	0	0	0	0	0	0	0	0.00422233	1.89414e-05	7.02073e-05	0.00022244	0	0	0.000168976	0	0	0	0	0	0
ASV_525	d__Bacteria	p__Proteobacteria	c__Gammaproteobacteria	o__Burkholderiales	f__Comamonadaceae			0.00753396	0.0155281	0	0	0	0	0	0	0	0	0	0	0	0	0	0	0	0	0	0	0	0.00753396	0	0	0	0	0	0	0	0
ASV_526	d__Bacteria	p__Actinobacteriota	c__Actinobacteria	o__Micrococcales	f__Micrococcaceae			0.00340506	0.0155281	0	0	0	0	0.000405378	0.000112562	0	0.000105184	0.000495333	0.000243447	0	0	0	0.000123269	0.000324769	5.88831e-05	0	0.000390016	0.00043239	0	0.000360949	0	0.000182252	0	0.000170627	0	0	0
ASV_527	d__Bacteria	p__Proteobacteria	c__Alphaproteobacteria	o__Rhizobiales	f__Rhizobiaceae	g__Aquamicrobium		0.0172244	0.0155281	0	0	0	0	0.000157795	0	0	0.000360631	0	0	0	0	0	9.95561e-05	0	0	0	0	0.000110063	0.000210999	0.0156784	0	0.00012599	0	0.000158125	0	0.000322827	0
ASV_529	d__Bacteria	p__Proteobacteria	c__Gammaproteobacteria	o__Burkholderiales	f__Gallionellaceae	g__Gallionella		0	0.0155281	0.00148238	0.0140457	0	0	0	0	0	0	0	0	0	0	0	0	0	0	0	0	0	0	0	0	0	0	0	0	0	0
ASV_530	d__Archaea	p__Crenarchaeota	c__Nitrososphaeria	o__Nitrososphaerales	f__Nitrososphaeraceae	g__Nitrososphaeraceae		0.0229707	0	0	0	8.01475e-05	0	0	0	0	0	0	0.0226812	0.000209421	0	0	0	0	0	0	0	0	0	0	0	0	0	0	0	0	0
ASV_531	d__Bacteria	p__Firmicutes	c__Bacilli	o__Staphylococcales	f__Staphylococcaceae	g__Staphylococcus		0.00830977	0	0	0	0	0	0	0	0	0	0	0	0	0	0	0.00830977	0	0	0	0	0	0	0	0	0	0	0	0	0	0
ASV_532	d__Bacteria	p__Proteobacteria	c__Gammaproteobacteria	o__Burkholderiales	f__Rhodocyclaceae	g__Sulfuritalea		0.000416051	0	0	0	0	0	0	0	0	0	0	0	0	0	0	0	0	0	0	0	5.50314e-05	6.50601e-05	0.000238408	0	0	0	0	0	0	5.75506e-05
ASV_534	d__Bacteria	p__Proteobacteria	c__Alphaproteobacteria	o__Caulobacterales	f__Caulobacteraceae	g__uncultured	s__uncultured_bacterium	0.00143888	0	0	0	0	0	0.000170945	0	0	0.000150263	0	0	0	0	0	2.92812e-05	0	0.000144176	0.000262301	0.000427085	0	0	0	0	7.87439e-05	0	0	0	0.000176087	0
ASV_535	d__Bacteria	p__Proteobacteria	c__Gammaproteobacteria	o__Burkholderiales	f__Comamonadaceae	g__Acidovorax		0.0056965	0.000359617	0	0	0	0	0	0	0	0	0	0	0	0.0056965	0	0	0	0	0	0	0	0	0	0	0	0	0	0	0	0
ASV_536	d__Bacteria	p__Verrucomicrobiota	c__Verrucomicrobiae	o__Chthoniobacterales	f__Terrimicrobiaceae	g__Terrimicrobium	s__uncultured_bacterium	0.01012	0.000359617	0	0	0	0	1.94359e-05	0	0	0	0	0	0	0	0	1.45022e-05	0	0	0	0	0	0	0.00987233	0	7.00967e-05	0	7.46491e-05	0	6.89412e-05	0
ASV_537	d__Bacteria	p__Gemmatimonadota	c__Longimicrobia	o__Longimicrobiales	f__Longimicrobiaceae			0.00877969	0.000359617	0	0	0	0	0	2.25124e-05	0	0	0	4.05745e-05	0	4.48936e-05	0	0	0	5.88831e-05	0	0	0.00843553	0.00011681	0	0	0	6.04835e-05	0	0	0	0
ASV_538	d__Bacteria	p__Proteobacteria	c__Alphaproteobacteria	o__Rhizobiales	f__Beijerinckiaceae	g__Methylobacterium-Methylorubrum		0.002747	0.000359617	0	0	0.000293083	0	0	0	0	0	0	0	0	0	0	9.95561e-05	0	0.0018985	0.0002121	0.00024376	0	0	0	0	0	0	0	0	0	0
ASV_539	d__Bacteria	p__Bacteroidota	c__Bacteroidia	o__Flavobacteriales	f__Flavobacteriaceae	g__Flavobacterium		0.00534128	0.000359617	0	0	0	0	0	0	0	0	0	0	0	0	0.000101264	0	0	0	0.00513311	0	0	0.000106902	0	0	0	0	0	0	0	0
ASV_541	d__Bacteria	p__Patescibacteria	c__Parcubacteria					0.00805963	0.000359617	0	0	0	0	0	0	0	0	0	0	0	0	0	0	9.02136e-05	0	0	0.000113755	0	0	0	0	0	0	0	0	0	0.00785566
ASV_542	d__Bacteria	p__Proteobacteria	c__Gammaproteobacteria	o__Burkholderiales	f__Methylophilaceae			0.0114004	0.000359617	0	0	0	0	0	0	0	0	0	0	0	0	0.0029164	0	0	0	0.00848399	0	0	0	0	0	0	0	0	0	0	0
ASV_543	d__Bacteria	p__Actinobacteriota	c__Actinobacteria	o__Corynebacteriales	f__Corynebacteriaceae	g__Corynebacterium	s__uncultured_bacterium	0.0156073	0.000359617	0	0	0	0	0	0	0	0	0	0	0	0	0	0	0	0.000826594	0	0	0	0	0.0147807	0	0	0	0	0	0	0
ASV_544	d__Bacteria	p__Proteobacteria	c__Gammaproteobacteria	o__Burkholderiales	f__Comamonadaceae			0.00809306	0.000359617	0	0	0	0	0	0	0	0	0	0	0	0	0	0	0	0	0	0	0	0	0	0	0	0	0	0	0	0.00809306
ASV_545	d__Bacteria	p__Proteobacteria	c__Alphaproteobacteria	o__Rhizobiales	f__Rhizobiaceae			0.00656084	0.000359617	0	0	0.000220406	0	0	0	0	0	0	0.000142011	0	0.00522761	0.000551666	0.000144181	0.000274963	0	0	0	0	0	0	0	0	0	0	0	0	0
ASV_546	d__Bacteria	p__Firmicutes	c__Bacilli	o__Staphylococcales	f__Staphylococcaceae			0.00082726	0.000359617	0	0	0	0.000135663	0	0	0	0	0	0	0.000150757	0	7.08846e-05	0	0	0	4.26181e-05	0	0	0.000160353	0	0	0	0.000266984	0	0	0	0
ASV_547	d__Bacteria	p__Actinobacteriota	c__Actinobacteria	o__Corynebacteriales	f__Corynebacteriaceae	g__Corynebacterium	s__uncultured_bacterium	0.00962137	0.000359617	0	0	0	0	0	0	0	0	0	0	0	0	0	0	0	0.00392443	0	0.000170314	0.0040066	0.000370843	0	0	0	0.00114919	0	0	0	0
ASV_548	d__Bacteria	p__Actinobacteriota	c__Actinobacteria	o__PeM15	f__PeM15	g__PeM15		0.0115005	0.00045755	0	0	0	0	0	0	5.5322e-05	0	0	0	0	1.8813e-05	0.010827	0.000135535	0.000322701	0	5.20888e-05	0	0	8.90853e-05	0	0	0	0	0	0	0	0
ASV_549	d__Bacteria	p__Bacteroidota	c__Bacteroidia	o__Flavobacteriales	f__Weeksellaceae	g__Chryseobacterium		0.013334	0.00045755	0	0	0	0.000434122	0	0.00143528	0.00143837	0	9.98303e-05	0.000158378	0.000301514	0.00247912	0.000251761	5.38243e-05	0.000334354	0.000107978	0.000146796	7.54119e-05	0	0.0016748	0	0	0	0.000306501	0	0.00403596	0	0
ASV_550	d__Bacteria	p__Bacteroidota	c__Bacteroidia	o__Cytophagales	f__Spirosomaceae	g__Pseudarcicella		0.00526472	0.00045755	0	0	0	0	0	8.69868e-05	0	0	0	0	0	0	0	0	0	0.00122397	0.000101	8.12533e-05	0	0	0	0.000818808	1.57488e-05	5.90765e-05	0.00287788	0	0	0
ASV_551	d__Bacteria	p__Proteobacteria	c__Gammaproteobacteria	o__Burkholderiales	f__Comamonadaceae			0.00607507	0.00045755	0	0	0	0	0	0.000565414	0	0	0	0.000791891	0	3.7626e-05	0	0	0	0.0034851	0.0002525	0.000942538	0	0	0	0	0	0	0	0	0	0
ASV_552	d__Bacteria	p__Spirochaetota	c__Leptospirae	o__Leptospirales	f__Leptospiraceae	g__Leptospira		0.0153275	0.00045755	0	0	0	0	0	0	0	0	8.98473e-05	0	0	0	0	0	0	1.48936e-05	0	0.0151235	0	0	0	0	0	0	0	7.04201e-05	0	2.87753e-05
ASV_553	d__Bacteria	p__Proteobacteria	c__Gammaproteobacteria	o__Xanthomonadales	f__Rhodanobacteraceae	g__uncultured		0.0158649	0.00045755	0	0	0	0	0	0	0	0	0	0.000356351	0	6.39641e-05	0	0	0	0	0	0	0.000533855	0	0	0.00042244	0	0.0144487	3.95313e-05	0	0	0
ASV_554	d__Bacteria	p__Proteobacteria	c__Gammaproteobacteria	o__Burkholderiales	f__Comamonadaceae	g__Comamonas		0.0146342	0.00045755	5.3863e-05	0.000305754	0	0	0	8.55471e-05	0.0132159	0.00115299	0.000179695	0	0	0	0	0	0	0	0	0	0	0	0	0	0	0	0	0	0	0
ASV_555	d__Bacteria	p__Actinobacteriota	c__Coriobacteriia	o__Coriobacteriales	f__Coriobacteriaceae	g__Collinsella	s__uncultured_bacterium	0.00427986	9.79326e-05	0	0	0	0	6.37046e-05	0	0	0	0	0	0	0	0	0.000122981	0	0	5.68241e-05	0.000162507	0	0	0	0	0	2.59215e-05	0.00361316	8.80251e-05	0.000146739	0
ASV_556	d__Bacteria	p__Proteobacteria	c__Gammaproteobacteria	o__Burkholderiales	f__Methylophilaceae			0	9.79326e-05	0	0	0	0	0	0	0	0	0	0	0	0	0	0	0	0	0	0	0	0	0	0	0	0	0	0	0	0
ASV_557	d__Bacteria	p__Chloroflexi	c__KD4-96	o__KD4-96	f__KD4-96	g__KD4-96	s__uncultured_bacterium	0.0160886	9.79326e-05	0	0	0.00017585	0	0	0	0	0	0	0.000118784	0	0	0	0	0	1.48936e-05	0	0	0.000355904	0	0	0.00042244	0	0.0148513	0.00011418	3.521e-05	0	0
ASV_558	d__Bacteria	p__Patescibacteria	c__Parcubacteria					0.0154488	9.79326e-05	0	0	0	0	8.32968e-06	0	0	0	0	0	0	0	0	0	0	0	0	0	0	0	3.59648e-05	0.000102229	0.0144013	0	0	0.000862646	3.83007e-05	0
ASV_559	d__Archaea	p__Crenarchaeota	c__Bathyarchaeia	o__Bathyarchaeia	f__Bathyarchaeia	g__Bathyarchaeia		0.0070668	9.79326e-05	0	0	0	0	0	0	0	0	0	0	0	0	0	0.00613148	0.00039694	0	0	0	0	0	0.000538371	0	0	0	0	0	0	0
ASV_560	d__Bacteria	p__Proteobacteria	c__Gammaproteobacteria	o__Burkholderiales	f__Methylophilaceae			0	9.79326e-05	0	0	0	0	0	0	0	0	0	0	0	0	0	0	0	0	0	0	0	0	0	0	0	0	0	0	0	0
ASV_561	d__Bacteria	p__Proteobacteria	c__Gammaproteobacteria	o__Burkholderiales	f__Comamonadaceae			0	9.79326e-05	0	0	0	0	0	0	0	0	0	0	0	0	0	0	0	0	0	0	0	0	0	0	0	0	0	0	0	0
ASV_562	d__Bacteria	p__Proteobacteria	c__Alphaproteobacteria	o__Rhizobiales	f__Rhizobiales_Incertae_Sedis	g__Bauldia		0.0101311	9.79326e-05	0	0	0	0	0	0	0	0	0	0	0	0	0	0	0	0	0	0	0.000374309	0.000180169	0.00948033	0	0	0	4.26567e-05	0	5.36209e-05	0
ASV_563	d__Bacteria	p__Firmicutes	c__Bacilli	o__Bacillales	f__Bacillaceae	g__Bacillus		0.000388191	0.000293684	0	0	0	0	0	0	0	0	0	0	0	0	0	0	0	0.000111878	0	0	0	0	0	0	0	0.000207372	0	0	6.89412e-05	0
ASV_565	d__Bacteria	p__Cyanobacteria	c__Cyanobacteriia	o__Cyanobacteriales	f__Nostocaceae	g__Nostoc_PCC-73102		0.000344253	0.000293684	0	0	0	0	0	0	0	6.90417e-05	0	0	0	0	0	5.07577e-05	0	0	8.42766e-05	4.8752e-05	0	0	0	0	7.00967e-05	0	2.13283e-05	0	0	0
ASV_566	d__Bacteria	p__Abditibacteriota	c__Abditibacteria	o__Abditibacteriales	f__Abditibacteriaceae	g__Abditibacterium	s__uncultured_bacterium	0.0088282	0.000293684	0	0	0	0	0	0	0	0	0	0	0	0	0	5.85624e-05	0	0	0	0	0	0	0.000163143	2.92082e-05	0.00820703	0	4.74376e-05	0	0.000322827	0
ASV_567	d__Bacteria	p__Actinobacteriota	c__Actinobacteria	o__Corynebacteriales	f__Nocardiaceae	g__Rhodococcus		0.00291854	0.000293684	9.79326e-05	0	0	0	0	0.000751914	0	0.000465815	0	0	0	0	0.000149407	0	0	0	0.00133219	0	0	0	0.000163143	0	5.60774e-05	0	0	0	0	0
ASV_568	d__Bacteria	p__Bacteroidota	c__Bacteroidia	o__Cytophagales	f__Spirosomaceae	g__Flectobacillus		0.00555298	0.000195751	0	0	0.00052755	0	0	0	0	0	0	0.000277162	0	2.25756e-05	0	0	0	0.00377578	6.81827e-05	0.000151461	0.000266928	0	0	0.000337952	0	0.000125387	0	0	0	0
ASV_569	d__Bacteria	p__Firmicutes	c__Bacilli	o__Staphylococcales	f__Staphylococcaceae	g__Staphylococcus		0	0.000195751	0	0	0	0	0	0	0	0	0	0	0	0	0	0	0	0	0	0	0	0	0	0	0	0	0	0	0	0
ASV_570	d__Bacteria	p__Actinobacteriota	c__MB-A2-108	o__MB-A2-108	f__MB-A2-108	g__MB-A2-108		0.0217569	0.000195751	0	0	0	0	0	0	0	0	0	0	0	0	0	0	0	0	0	9.42649e-05	0	1.9518e-05	1.79824e-05	4.38122e-05	0.0108264	0	0	0.010732	2.29804e-05	0
ASV_571	d__Bacteria	p__Bacteroidota	c__Bacteroidia	o__Sphingobacteriales	f__AKYH767	g__AKYH767		0.0199597	0.000195751	0	0	0	0	0	0	0	0	2.27217e-05	0	0	0	0	0	0.000117841	2.35532e-05	0	0.0197956	0	0	0	0	0	0	0	0	0	0
ASV_572	d__Bacteria	p__Proteobacteria	c__Alphaproteobacteria	o__Rhizobiales	f__Xanthobacteraceae	g__Bradyrhizobium		0.000323718	0.000195751	0	0	0	0	0	0	0	0	0	0	0	0	0	0	0	0	0	0	0	0	0	0.000189853	0.000133865	0	0	0	0	0
ASV_573	d__Bacteria	p__Proteobacteria	c__Alphaproteobacteria	o__Caulobacterales	f__Hyphomonadaceae	g__Hirschia	s__uncultured_bacterium	0.00975402	0.000195751	0	0	0	0	1.38828e-05	0	0	0.000103563	0	0	0	0	0	5.07577e-05	0	0	0	0	0.000442382	0.000110602	0.00897951	0	0	0	5.33208e-05	0	0	0
ASV_574	d__Bacteria	p__Proteobacteria	c__Gammaproteobacteria	o__Burkholderiales	f__Comamonadaceae			0.0195222	0.000195751	0	0	0	0	0	0	0	0	0	0	0	0	0	0	0.0195222	0	0	0	0	0	0	0	0	0	0	0	0	0
ASV_575	d__Bacteria	p__Proteobacteria	c__Gammaproteobacteria	o__Pseudomonadales	f__Pseudomonadaceae	g__Pseudomonas		0.00532564	0.000195751	0	0	0	0	0.00170728	0	0	0.000766341	0.000249939	0	0	0	0	0.00189157	0	0	0	0	0	0	0	0	0.000259855	0	0.000450657	0	0	0
ASV_576	d__Bacteria	p__Verrucomicrobiota	c__Omnitrophia	o__Omnitrophales	f__Omnitrophaceae	g__Candidatus_Omnitrophus	s__uncultured_bacterium	0.000353597	0.000195751	0	0	0	0	0	0	0	0	0	0	0	0	0	0	0	0	0	0.000146256	0	0	0	8.76245e-05	9.81354e-05	0	0	0	0	2.15815e-05
ASV_577	d__Bacteria	p__Verrucomicrobiota	c__Verrucomicrobiae	o__Opitutales	f__Opitutaceae	g__Opitutus		0.00679792	0.000195751	0	0	0	0	9.20471e-05	0	0	0	0	0	0	5.61814e-05	0.000220291	0.00602412	0.000144342	0	0	0	0	0	0.0001142	0	0	0	0	0	0.000146739	0
ASV_578	d__Archaea	p__Halobacterota	c__Methanosarcinia	o__Methanosarciniales	f__Methanosaetaceae	g__Methanosaeta	s__uncultured_archaeon	0.00844668	0.000195751	0	0	0	0.00146516	0.000105197	0	0	0	0	0	0	0	0.00189363	0.00480324	0	0	0	0	0	0	0.000179457	0	0	0	0	0	0	0
ASV_579	d__Bacteria	p__Proteobacteria	c__Gammaproteobacteria	o__Gammaproteobacteria_Incertae_Sedis	f__Unknown_Family	g__Acidibacter		0.00108797	0.000195751	0	0	0.000689339	0.000145493	0.000115726	0	0	0	7.98642e-05	0	0	0	0	0	0	0	0	0	0	0	0	0	0	0	0	0	0	5.75506e-05
ASV_580	d__Bacteria	p__Proteobacteria	c__Gammaproteobacteria	o__Burkholderiales	f__Methylophilaceae			0.0110679	0.000195751	0	0	0	0	0	0	0	0	0	0	0.00195984	0	0	0	0	0	0	0	0	0	0.00910807	0	0	0	0	0	0	0
ASV_581	d__Bacteria	p__Proteobacteria	c__Gammaproteobacteria	o__Burkholderiales	f__Burkholderiaceae	g__Ralstonia		0.0109676	0.000195751	0	0	0	0	0	0	0	0	0	0	0	0	0.0108251	0	0	0	0	0	0	0.000142536	0	0	0	0	0	0	0	0
ASV_582	d__Bacteria	p__Bacteroidota	c__Bacteroidia	o__Flavobacteriales	f__Flavobacteriaceae	g__Flavobacterium	s__uncultured_bacterium	0.00440695	0.000195751	7.34495e-05	0.000122302	0	0	0.000480345	0	0	0	0.00243472	0	0	0	0	0.0013052	0	0	0	0	0	0	7.19295e-05	0	8.41161e-05	0	0	0	3.06405e-05	0
ASV_583	d__Bacteria	p__Actinobacteriota	c__Actinobacteria	o__Propionibacteriales	f__Nocardioidaceae	g__Aeromicrobium		0.00893546	0	0	0	0	0	0	0	0	0.000105184	0	0	0	0	0	6.44187e-05	0	0	0	0	0	0	6.52571e-05	0.000675904	0.00767252	0	0	0	0.000352175	0
ASV_585	d__Bacteria	p__Proteobacteria	c__Alphaproteobacteria	o__Rhizobiales	f__Rhizobiaceae	g__Ochrobactrum		0.000836198	0	0	0	0	0	0	0.000292661	0	0	0	0	0	0	0	0	0	5.88831e-05	0	0.000162507	0	0	0.000125877	0	0.000196271	0	0	0	0	0
ASV_586	d__Bacteria	p__Patescibacteria	c__Parcubacteria					0.00654541	8.81394e-05	0	0	0	0	0	0	0	0	0	0	0	0	0	0	0	0.00121071	1.4206e-05	0.000113755	0	0	0	0	0	0	0	0	9.19216e-05	0.00511481
ASV_587	d__Bacteria	p__Proteobacteria	c__Gammaproteobacteria	o__Burkholderiales	f__Comamonadaceae	g__Acidovorax		0.0033902	8.81394e-05	0	0	0	0	0.000594184	0.000859973	0	0	0.000763449	0	0	0.000688555	0	0	0	0.000484042	0	0	0	0	0	0	0	0	0	0	0	0
ASV_588	d__Bacteria	p__Proteobacteria	c__Alphaproteobacteria	o__Rhizobiales	f__Rhizobiaceae			0.00899494	8.81394e-05	0	0	0	0	0	0	0	0.00012021	0	0	0	0	0	0	0	0	0	0	0	0	0.0001142	0.00118077	0.00757976	0	0	0	0	0
ASV_589	d__Bacteria	p__Bacteroidota	c__Bacteroidia	o__Cytophagales	f__Cytophagaceae	g__Cytophaga	s__uncultured_bacterium	0	8.81394e-05	0	0	0	0	0	0	0	0	0	0	0	0	0	0	0	0	0	0	0	0	0	0	0	0	0	0	0	0
ASV_591	d__Bacteria	p__Planctomycetota	c__Phycisphaerae	o__mle1-8	f__mle1-8	g__mle1-8	s__uncultured_organism	0.00835894	8.81394e-05	0	0	0	0	5.25984e-05	0	0	0	0	0	0	0	0	0	0	0	0	0	0	0	0	0	0	6.9124e-05	0.00809638	0.00014084	0	0
ASV_593	d__Archaea	p__Nanoarchaeota	c__Nanoarchaeia	o__Woesearchaeales	f__Woesearchaeales	g__Woesearchaeales		0.00512005	8.81394e-05	0	0	0	0	0	9.00495e-06	7.37626e-05	0	0	0	0.000120605	0	4.05055e-05	0	0	7.6548e-05	0.00469272	0	0	0.000106902	0	0	0	0	0	0	0	0
ASV_595	d__Archaea	p__Nanoarchaeota	c__Nanoarchaeia	o__Woesearchaeales				0.00828428	8.81394e-05	0	0	0	0	0	0	0	0	0	0	0	0	0	0	0	0	0	0	0	0	0	5.84163e-05	0.00807912	0	0	0	0.000146739	0
ASV_596	d__Bacteria	p__Proteobacteria	c__Alphaproteobacteria	o__Sphingomonadales	f__Sphingomonadaceae	g__Sphingomonas		0.00718518	8.81394e-05	0	0	0	0	0	0	0	0	0	0	0	0	0	0	0	0	0	0	3.93082e-05	0.00452818	9.78857e-05	0	0.0025198	0	0	0	0	0
ASV_597	d__Bacteria	p__Verrucomicrobiota	c__Omnitrophia	o__Omnitrophales	f__Omnitrophaceae	g__Candidatus_Omnitrophus	s__uncultured_bacterium	0.0145097	8.81394e-05	0	0	0.000234467	0	0	0.00013048	0	0	0	0.000118784	0	1.50504e-05	0	0	0	3.7234e-05	0	0	0	0	0	0	0	0.0139736	0	0	0	0
ASV_598	d__Bacteria	p__Proteobacteria	c__Gammaproteobacteria	o__Pseudomonadales	f__Pseudomonadaceae	g__Pseudomonas		0.00692407	8.81394e-05	0	0	0	0	0	0	0	0	0	0	0	6.98345e-05	0	0.00401738	0.000414983	0	0	0	0.00233491	0	0	0	0	0	8.69689e-05	0	0	0
ASV_599	d__Bacteria	p__Chloroflexi	c__Anaerolineae	o__Ardenticatenales	f__Ardenticatenaceae	g__uncultured		0.000146301	8.81394e-05	0	0	0	0	0	0	0	0	0	0	0	0	0	0	0	0	0	0	0	0.000124719	0	0	0	0	0	0	0	2.15815e-05
ASV_601	d__Bacteria	p__Firmicutes	c__Bacilli	o__Staphylococcales	f__Gemellaceae	g__Gemella		0.0155509	8.81394e-05	0	0	0.000100184	0	0	0	0	0	0	0	0.00753784	0	0.000128063	0.000790593	0	0.00188954	5.04999e-05	0	0	0	0	0	0	0	0	0	0	0.0050542
ASV_602	d__Bacteria	p__Fusobacteriota	c__Fusobacteriia	o__Fusobacteriales	f__Leptotrichiaceae	g__Leptotrichia		0.00608395	8.81394e-05	0	0	0	0	6.57479e-05	0	0	0	0	0	0	1.99527e-05	0.000134916	0.00581609	0	0	0	0	0	0	0	0	4.72463e-05	0	0	0	0	0
ASV_604	d__Bacteria	p__Proteobacteria	c__Alphaproteobacteria	o__Sphingomonadales	f__Sphingomonadaceae	g__Sphingomonas		0.0178632	8.81394e-05	0	0	0	0	0	0	0	0	0	0	0	0	0	0	0.00019847	0	0	0.000227509	0	0	0	0	0	0.000111455	0	0.0172538	0	7.19383e-05
ASV_606	d__Bacteria	p__Cyanobacteria	c__Vampirivibrionia					0.00783442	8.81394e-05	0	0	0	0	1.66594e-05	0	0	0.000276167	0	0	0	0	0	4.35066e-05	0	0	0	0	0	0	6.29383e-05	0	9.81354e-05	0	0	0	0.00731543	2.15815e-05
ASV_608	d__Bacteria	p__Patescibacteria	c__Saccharimonadia	o__Saccharimonadales				0.0136214	8.81394e-05	0	0	0	0	0	0	5.5322e-05	0	0	0	9.04541e-05	1.49645e-05	0	0	0	2.60638e-05	0	0	0	0.00484624	0	0	0	0.00700393	0	0.00158445	0	0
ASV_609	d__Bacteria	p__Proteobacteria	c__Alphaproteobacteria	o__Sphingomonadales	f__Sphingomonadaceae	g__Sphingomonas		0.0109127	8.81394e-05	0	0	0.0015279	0.000325591	0	0.000568568	0.000421123	0	0.000249576	0.00118519	0.000209421	0.000365534	0.000484361	0.000116018	0.000505196	0.000448203	0.000369294	0.00050377	0.000440252	0.000332614	0	0.00194224	0.00022431	0.000302418	0	0.00021126	0	0.000179846
ASV_610	d__Bacteria	p__Proteobacteria	c__Gammaproteobacteria	o__Oceanospirillales	f__Halomonadaceae	g__Chromohalobacter		0.0149824	8.81394e-05	0	0	0	0	0	0	0	0	0	0	0	0	0	0	0	5.61118e-05	8.42766e-05	0.014842	0	0	0	0	0	0	0	0	0	0
ASV_611	d__Bacteria	p__Proteobacteria	c__Gammaproteobacteria	o__Burkholderiales	f__Alcaligenaceae			0.00582085	8.81394e-05	8.81394e-05	0	0.000100184	2.90985e-05	0.00102177	0.000801441	0.000300958	0.000172604	0.000527143	0	0	1.49645e-05	0	0	0	0	0	0	0	0	0.00285268	0	0	0	0	0	0	0
ASV_612	d__Bacteria	p__Proteobacteria	c__Gammaproteobacteria	o__Burkholderiales	f__Neisseriaceae	g__uncultured	s__uncultured_bacterium	0.010277	0	0	0	0.000117233	0.000334633	0.000223543	0.00013048	0.000629275	9.01578e-05	0	0.000197973	0.000547716	2.63382e-05	0.000640314	0.000128837	0	0	0.000504999	0	0	0.000266746	0.000195771	0	0.000112928	0.00557609	0.000143048	0	0.00041087	0
ASV_613	d__Bacteria	p__Actinobacteriota	c__Acidimicrobiia	o__Microtrichales	f__Ilumatobacteraceae	g__uncultured	s__uncultured_bacterium	0.00590565	0	0	0	0	0	0	0	0	0	0	0	0	0	0	0	0	0.00185425	0	9.75039e-05	0	0	0	0	0.0039539	0	0	0	0	0
ASV_614	d__Bacteria	p__Proteobacteria	c__Alphaproteobacteria	o__Rhizobiales	f__Rhizobiaceae			0.0178268	0	0	0	0	0	0	0	0	0	0	0	0	0	0	0	0	9.39522e-05	6.62948e-05	0.0176665	0	0	0	0	0	0	0	0	0	0
ASV_615	d__Bacteria	p__Patescibacteria	c__Parcubacteria	o__Candidatus_Yanofskybacteria	f__Candidatus_Yanofskybacteria	g__Candidatus_Yanofskybacteria	s__uncultured_bacterium	0.000139441	0	0	0	0	0	0	0	0	0	0	0	0	0	0	0	0	7.6548e-05	0	0	6.28931e-05	0	0	0	0	0	0	0	0	0
ASV_616	d__Bacteria	p__Patescibacteria	c__Parcubacteria					0.008422	0	0	0	0	0	0	0	0	0	0	0	0	0	0	0	7.21709e-05	0	0	0	0	0.00060578	0	0	0	0.00172755	0	5.2815e-05	0	0.00596369
ASV_617	d__Bacteria	p__Actinobacteriota	c__Actinobacteria	o__Propionibacteriales	f__Nocardioidaceae	g__Nocardioides	s__uncultured_bacterium	0.00243594	0	0	0	0.000937866	0	0.000142758	0	0	0	0	0	0	0	0	0	0	0.00135532	0	0	0	0	0	0	0	0	0	0	0	0
ASV_618	d__Archaea	p__Nanoarchaeota	c__Nanoarchaeia	o__Woesearchaeales	f__Woesearchaeales	g__Woesearchaeales		7.04683e-05	0	0	0	0	0	0	0	5.47196e-05	0	0	0	0	0	0	0	0	0	0	0	0	0	0	0	1.57488e-05	0	0	0	0	0
ASV_619	d__Bacteria	p__Proteobacteria	c__Alphaproteobacteria	o__Rhodobacterales	f__Rhodobacteraceae	g__Rubellimicrobium	s__uncultured_bacterium	0.0180252	0	0	0	0	0	0	0	0	0	3.63547e-05	0	0	0	0	0	0	4.12182e-05	0.000163818	0.0176841	0	0	0	0	0	0	0	0	0	9.97539e-05
ASV_620	d__Bacteria	p__Proteobacteria	c__Alphaproteobacteria	o__Sphingomonadales	f__Sphingomonadaceae	g__Sphingomonas		0.00625337	0	0	0	0	0	0	0	0	0	0	0	0	0	0	0	0	0.00373898	0	0	0	0	0	0	0	0.00251439	0	0	0	0
ASV_621	d__Bacteria	p__Actinobacteriota	c__Actinobacteria	o__Propionibacteriales	f__Nocardioidaceae	g__Nocardioides	s__uncultured_bacterium	0	0	0	0	0	0	0	0	0	0	0	0	0	0	0	0	0	0	0	0	0	0	0	0	0	0	0	0	0	0
ASV_622	d__Bacteria	p__Firmicutes	c__Bacilli	o__Staphylococcales	f__Staphylococcaceae	g__Staphylococcus		0	0	0	0	0	0	0	0	0	0	0	0	0	0	0	0	0	0	0	0	0	0	0	0	0	0	0	0	0	0
ASV_623	d__Bacteria	p__Proteobacteria	c__Gammaproteobacteria					0.0136051	0	0	0	0.000117233	0	0	0	0	0	0	0	0	0	0	0	0	1.8617e-05	0	0	0	0	0	0	0	0.0134052	6.3985e-05	0	0	0
ASV_624	d__Bacteria	p__Firmicutes	c__Clostridia	o__Lachnospirales	f__Lachnospiraceae	g__Lachnospiraceae_UCG-001		0.00493527	0	0	0	0	0	0	0	0.000165966	0	0	0	0	0	0.00011139	0	0	5.88831e-05	0.00445278	0.000146256	0	0	0	0	0	0	0	0	0	0
ASV_625	d__Bacteria	p__Proteobacteria	c__Alphaproteobacteria	o__Paracaedibacterales	f__Paracaedibacteraceae			0.0134136	0	0	0	0	0	0	0	0	0	0	0	0	0	0	4.35066e-05	0	0	0	0	0	0	7.19295e-05	0.000131437	0.0131361	0	0	0	3.06405e-05	0
ASV_626	d__Bacteria	p__Actinobacteriota	c__Actinobacteria	o__Micrococcales	f__Dermacoccaceae			0.00645502	0	0	0	0	0	0	0	0	0	0	0	0	0	0	0	0	3.7234e-05	0	0.00632026	0	0	0	0	0	9.75229e-05	0	0	0	0
ASV_627	d__Bacteria	p__Firmicutes	c__Clostridia	o__Clostridia	f__Hungateiclostridiaceae	g__Fastidiosipila	s__uncultured_bacterium	0.00117	0	0	0	0	0.000271326	0	0	0.000239729	0	0	0	0	0	0.000182275	0	0	0	6.62948e-05	0	0	0.000195988	0	0	0	0	0	0	0.000214388	0
ASV_628	d__Bacteria	p__Proteobacteria	c__Gammaproteobacteria	o__Burkholderiales	f__Methylophilaceae			0.0143954	0	0	0	0	0	0	0	0	0	0	0	0	0	0	0	0	0	0	0.00246974	0	0	0	0	0	0.0119257	0	0	0	0
ASV_629	d__Bacteria	p__Firmicutes	c__Clostridia	o__Oscillospirales	f__UCG-010	g__UCG-010	s__uncultured_bacterium	0.00847546	0	0	0	0.000100184	0	0	0	0	0	0	0.000202873	0	5.98581e-05	0	0	0	3.53299e-05	0	0	3.14465e-05	0	0	0	0	0.007908	8.49459e-05	5.2815e-05	0	0
ASV_632	d__Bacteria	p__Proteobacteria	c__Gammaproteobacteria	o__Burkholderiales	f__Methylophilaceae			0.0142001	0	0	0	0	0.0142001	0	0	0	0	0	0	0	0	0	0	0	0	0	0	0	0	0	0	0	0	0	0	0	0
ASV_634	d__Bacteria	p__Chloroflexi	c__Anaerolineae	o__SBR1031	f__SBR1031	g__SBR1031		0.0074678	0	0	0	0	0	0	0	0	6.90417e-05	0	0	0	0	0	0	0	0	0	0	0	0	0	0	0	0	0	0	0.00738437	1.43877e-05
ASV_635	d__Bacteria	p__Patescibacteria	c__Parcubacteria					0.000442074	0	0	0	0	8.72956e-05	0	0	0.000136799	0	0	0	0	0	0	0	0	0	9.08999e-05	0	0	3.90361e-05	0	0	0	0	0	0	8.80437e-05	0
ASV_637	d__Bacteria	p__Firmicutes	c__Bacilli	o__Lactobacillales	f__Aerococcaceae			0.0170557	0	0	0	0	0	0	0	0	0	8.98473e-05	0	0	0	0	0	0.000162385	0	0	0.000357514	0	0	0	0	0	0	4.26567e-05	0.0148058	0.00149674	0.000100714
ASV_638	d__Bacteria	p__Proteobacteria	c__Gammaproteobacteria	o__Burkholderiales	f__Comamonadaceae			0.0128125	0	0	0	0.000160295	0	0	0.00397609	0	0	2.7266e-05	0.00453603	0	5.98581e-05	0	0	0	0.00379207	0	0.000191769	0	0	0	0	0	6.9124e-05	0	0	0	0
ASV_639	d__Bacteria	p__Chloroflexi	c__Anaerolineae	o__Anaerolineales	f__Anaerolineaceae	g__uncultured		0.00692247	0	0	0	0	0	0	0	0	0	5.98982e-05	0	0	0	0	0	9.02136e-05	0	0	0.000162507	0	0	0	0	0	0	0	0	0.000156985	0.00645287
ASV_640	d__Bacteria	p__Bacteroidota	c__Bacteroidia	o__Bacteroidales	f__Porphyromonadaceae	g__Porphyromonas	s__uncultured_bacterium	0.0154977	4.03687e-05	0	0	0	0	8.32968e-06	0	0	0	9.08868e-06	0	9.04541e-05	0	0	2.17533e-05	0	0	0	0	0	0.000106902	6.29383e-05	0	0	0	2.13283e-05	0.000275179	0.000275669	0.0146261
ASV_641	d__Bacteria	p__Firmicutes	c__Clostridia	o__Peptostreptococcales-Tissierellales	f__Peptostreptococcales-Tissierellales	g__Anaerococcus		0.00670153	4.03687e-05	0	0	0	8.72956e-05	0	0	0	0	0	0	0	0	0.000320157	0	0	0	0	0	0.00190252	0.00439156	0	0	0	0	0	0	0	0
ASV_642	d__Archaea	p__Crenarchaeota	c__Nitrososphaeria	o__Nitrososphaerales	f__Nitrososphaeraceae	g__Nitrososphaeraceae		0.018783	4.03687e-05	0	0	0	0	0	0	0	0	0	0.0187657	0	0	0	0	0	0	0	0	0	0	0	0	0	1.7281e-05	0	0	0	0
ASV_643	d__Bacteria	p__Proteobacteria	c__Gammaproteobacteria	o__Burkholderiales	f__Comamonadaceae	g__Aquabacterium		0.00316436	4.03687e-05	0	0	0	0	0	0	0	0	0.00110882	0	0	0	0	0.00205554	0	0	0	0	0	0	0	0	0	0	0	0	0	0
ASV_644	d__Bacteria	p__Patescibacteria	c__Parcubacteria	o__GWA2-38-13b	f__GWA2-38-13b	g__GWA2-38-13b	s__uncultured_bacterium	0.0171504	4.03687e-05	0	0	0	0	0	0	0	0	0	0	0	0	8.53752e-05	5.07577e-05	0.0170143	0	0	0	0	0	0	0	0	0	0	0	0	0
ASV_647	d__Bacteria	p__Bacteroidota	c__Bacteroidia	o__Bacteroidales	f__Porphyromonadaceae	g__Porphyromonas		0.00436582	4.03687e-05	0	0	0	0	0	0.000173974	0.00309166	0	0	0.000118784	0	1.8813e-05	0	0	0	2.60638e-05	0	0.000131971	0	0	0	0.00042244	7.97006e-05	6.96592e-05	0	0	0	0.000232759
ASV_649	d__Bacteria	p__Patescibacteria	c__Saccharimonadia	o__Saccharimonadales	f__LWQ8	g__LWQ8		0.0072654	4.03687e-05	0	0	0	0	1.38828e-05	0	0	0.000172604	0	0	0	0	0	3.62555e-05	0	0	0	0	0	0	3.59648e-05	0	0	0	0	0	0.00697072	3.59692e-05
ASV_650	d__Bacteria	p__Firmicutes	c__Clostridia	o__Peptostreptococcales-Tissierellales	f__Anaerovoracaceae	g__Anaerovorax	s__uncultured_bacterium	0.00776837	4.03687e-05	0	0	0	0	5.25984e-05	0	0	0	0	0	0	0	0	3.51374e-05	0	0	0	0	0	0	0	0	1.57488e-05	8.35911e-05	0.00715351	0.000310389	0.000117392	0
ASV_652	d__Archaea	p__Crenarchaeota	c__Thermoprotei	o__Sulfolobales	f__Sulfolobaceae	g__Stygiolobus		0.00349999	4.03687e-05	0	0	0	0	0	0	0	0	0	0	0	0	0	0	0	0.00349999	0	0	0	0	0	0	0	0	0	0	0	0
ASV_653	d__Bacteria	p__Proteobacteria	c__Alphaproteobacteria	o__Rhizobiales	f__Devosiaceae	g__Devosia		0.00886586	4.03687e-05	0	0	0	0	0.000157795	0	0	0	0	0	0	0	0	0	0	0	0	0	0	0	0	0.00185354	0.00640975	0	6.32501e-05	0	0.000381523	0
ASV_654	d__Bacteria	p__Firmicutes	c__Bacilli	o__Staphylococcales	f__Staphylococcaceae	g__Staphylococcus		0.0150944	4.03687e-05	0	0	0	0	0	0	0	0	0	0	0.0150944	0	0	0	0	0	0	0	0	0	0	0	0	0	0	0	0	0
ASV_655	d__Bacteria	p__Firmicutes	c__Bacilli	o__Staphylococcales	f__Staphylococcaceae	g__Staphylococcus		0.00823284	4.03687e-05	0	0	0	0	0	0	0	0	0	0	0	0	0	0	0	0	0	0	8.6478e-05	0.000124719	0.00791225	0	5.60774e-05	0	5.33208e-05	0	0	0
ASV_657	d__Bacteria	p__Actinobacteriota	c__Actinobacteria	o__Corynebacteriales	f__Corynebacteriaceae	g__Lawsonella	s__uncultured_bacterium	0	4.03687e-05	0	0	0	0	0	0	0	0	0	0	0	0	0	0	0	0	0	0	0	0	0	0	0	0	0	0	0	0
ASV_658	d__Bacteria	p__Firmicutes	c__Bacilli	o__Bacillales	f__Planococcaceae	g__Planococcus		0.0265971	4.03687e-05	0	0	0	0	0	0.016787	0.00647014	0.00104496	0.00111213	0	0	0	0	0	0	0	0	0	0	0	0	0.00118283	0	0	0	0	0	0
ASV_659	d__Bacteria	p__Patescibacteria	c__ABY1	o__Candidatus_Falkowbacteria	f__Candidatus_Falkowbacteria	g__Candidatus_Falkowbacteria		0.000435999	4.03687e-05	0	0	0.000120221	0	0	9.00495e-06	0	0	0	8.11491e-05	0	0	0	0	0	0.000131186	0	0	3.93082e-05	0	0	2.92082e-05	0	2.59215e-05	0	0	0	0
ASV_660	d__Bacteria	p__Actinobacteriota	c__Actinobacteria	o__Pseudonocardiales	f__Pseudonocardiaceae	g__Saccharopolyspora		0.00491265	4.03687e-05	0	0	0	0	0	0	0	0	0	0	0	0.00448437	0.000428274	0	0	0	0	0	0	0	0	0	0	0	0	0	0	0
ASV_661	d__Bacteria	p__Chloroflexi	c__Dehalococcoidia	o__GIF9	f__AB-539-J10	g__SCGC-AB-539-J10	s__uncultured_bacterium	0.00191408	4.03687e-05	0	0	0	0	1.38828e-05	0	0	0	0	0	0	0	0	0.00162425	0	0	5.04999e-05	0.000162507	0	0	6.29383e-05	0	0	0	0	0	0	0
ASV_662	d__Bacteria	p__Proteobacteria	c__Gammaproteobacteria	o__Burkholderiales	f__Comamonadaceae	g__Aquabacterium		0.013298	4.03687e-05	0	0	0	0.013298	0	0	0	0	0	0	0	0	0	0	0	0	0	0	0	0	0	0	0	0	0	0	0	0
ASV_664	d__Bacteria	p__Chloroflexi	c__Dehalococcoidia	o__GIF9	f__AB-539-J10	g__AB-539-J10		0.00509316	4.03687e-05	9.79326e-06	3.05754e-05	0	0	1.11062e-05	2.25124e-05	0	0	0	0.000162298	0	3.99054e-05	0	0.00469386	0	3.53299e-05	0	0	0	0	0	0.000102229	0	2.59215e-05	0	0	0	0
ASV_665	d__Bacteria	p__Proteobacteria	c__Gammaproteobacteria	o__Burkholderiales	f__Comamonadaceae	g__Aquabacterium		0.00231002	0	0	0	0	0	0.000746894	0	0	0	0.000840703	0	0	0.000722418	0	0	0	0	0	0	0	0	0	0	0	0	0	0	0	0
ASV_666	d__Bacteria	p__Proteobacteria	c__Gammaproteobacteria	o__Xanthomonadales	f__Xanthomonadaceae	g__Lysobacter		0.00400604	0	0	0	0	0	0	0	0	0.000483292	0	0	0	0	0	4.35066e-05	0	5.29948e-05	0.000142989	0.00303076	0	0	0	0	0.000168232	0	0	0	8.42615e-05	0
ASV_667	d__Bacteria	p__Firmicutes	c__Bacilli	o__Staphylococcales	f__Staphylococcaceae	g__Staphylococcus		0	0	0	0	0	0	0	0	0	0	0	0	0	0	0	0	0	0	0	0	0	0	0	0	0	0	0	0	0	0
ASV_669	d__Bacteria	p__Patescibacteria	c__Gracilibacteria	o__Gracilibacteria	f__Gracilibacteria	g__Gracilibacteria		0.000312004	0	0	0	0	0	0	0	0.000147525	0	0	0	0	0	0	0	0	0	8.52362e-05	0	0	0	0	0	0	2.59215e-05	5.33208e-05	0	0	0
ASV_670	d__Bacteria	p__Proteobacteria	c__Gammaproteobacteria	o__Pseudomonadales	f__Pseudomonadaceae	g__Pseudomonas		0.00930614	0	0	0	0	0	0	0	0	0	0	0	0	0	0.00930614	0	0	0	0	0	0	0	0	0	0	0	0	0	0	0
ASV_671	d__Bacteria	p__Proteobacteria	c__Alphaproteobacteria	o__Rhodobacterales	f__Rhodobacteraceae	g__Paracoccus		9.44927e-05	0	0	0	0	0	0	0	0	0	0	0	0	0	0	0	0	0	0	0	0	0	0	0	9.44927e-05	0	0	0	0	0
ASV_672	d__Bacteria	p__Proteobacteria	c__Gammaproteobacteria	o__Burkholderiales	f__Comamonadaceae			0.00665253	0	0	0	0	0	0	0	0	0	0	0	0	0	0	5.85624e-05	0	0	0.000719772	0	0	0	0	0	0	0.000111455	0.00576275	0	0	0
ASV_673	d__Bacteria	p__Proteobacteria	c__Gammaproteobacteria	o__Burkholderiales	f__Comamonadaceae	g__Polaromonas		0	0	0	0	0	0	0	0	0	0	0	0	0	0	0	0	0	0	0	0	0	0	0	0	0	0	0	0	0	0
ASV_674	d__Bacteria	p__Proteobacteria	c__Alphaproteobacteria	o__Rickettsiales	f__Mitochondria	g__Mitochondria		0.0164523	0	0	0	0	0	0	3.60198e-05	0.0159696	0.000262762	0	0	0.000150757	0	0	0	0	0	3.31474e-05	0	0	0	0	0	0	0	0	0	0	0
ASV_675	d__Bacteria	p__Actinobacteriota	c__Actinobacteria	o__Corynebacteriales	f__Corynebacteriaceae	g__Lawsonella	s__uncultured_bacterium	0	0	0	0	0	0	0	0	0	0	0	0	0	0	0	0	0	0	0	0	0	0	0	0	0	0	0	0	0	0
ASV_676	d__Bacteria	p__Firmicutes	c__Bacilli	o__Bacillales	f__Bacillaceae	g__Anoxybacillus		0.0127769	0	0	0	0	0.00397195	0	0	0	0	0	0	0	0	0	0	0	0	0	0	0	0	0	0	0	0.00880493	0	0	0	0
ASV_677	d__Bacteria	p__Acidobacteriota	c__Thermoanaerobaculia	o__Thermoanaerobaculales	f__Thermoanaerobaculaceae	g__Subgroup_10		0.00863311	0	0	0	0	0	1.94359e-05	0	0	0.000103563	0	0.00087108	0	0	0	2.17533e-05	0	0	0	0	3.14465e-05	4.55421e-05	0.00749763	0	0	0	4.26567e-05	0	0	0
ASV_678	d__Bacteria	p__Armatimonadota	c__Armatimonadia	o__Armatimonadales	f__Armatimonadales	g__Armatimonadales		0.00189673	0	0	0	0	0	0	0	0	0	0	0	0	0	0	0	7.85608e-05	0	0	0.000282795	0	0	0	0.000929368	0.000239102	0	0	0.000366905	0	0
ASV_679	d__Bacteria	p__Bacteroidota	c__Bacteroidia	o__Cytophagales	f__Hymenobacteraceae	g__Hymenobacter	s__uncultured_bacterium	0.00712442	0	0	0	0	0	0	0	0	0	0	0	0	0	0	5.27062e-05	0	0	0	0	0	0	0.000146829	5.84163e-05	0.00686647	0	0	0	0	0
ASV_680	d__Bacteria	p__Proteobacteria	c__Alphaproteobacteria	o__Caulobacterales	f__Caulobacteraceae	g__Phenylobacterium		0.00382803	0	0	0	0	0	0.000366193	0	0.00131327	0	0.000127241	0.000580491	0.000478716	0	0	0	0	0	0	0	0	0.000962121	0	0	0	0	0	0	0	0
ASV_681	d__Bacteria	p__Bacteroidota	c__Bacteroidia	o__Bacteroidales	f__Prolixibacteraceae	g__WCHB1-32	s__uncultured_bacterium	0.0166709	0	0	0	0	0	0	0	0	0	9.08868e-06	0	0	0	0	0	0.000157122	0.00011967	4.04e-05	0.0150616	0	0	0	0	0	0	0	0.000917263	0	0.000365764
ASV_683	d__Archaea	p__Crenarchaeota	c__Nitrososphaeria	o__Nitrosopumilales	f__Nitrosopumilaceae	g__Candidatus_Nitrosotenuis	s__uncultured_archaeon	0.00673266	0	0	0	0	0	0	0	0	0	0	0	0	0	0	0	0.000216513	0	0	0	0	0	0	0	0	0	0	0	0.000293479	0.00622266
ASV_684	d__Bacteria	p__Actinobacteriota	c__Actinobacteria	o__Actinomycetales	f__Actinomycetaceae			0.000113448	0	0	0	0	0	0	0	0	0	0	0	0	0	0	0	0	0	0	0	5.50314e-05	0	0	5.84163e-05	0	0	0	0	0	0
ASV_685	d__Bacteria	p__Proteobacteria	c__Gammaproteobacteria	o__Burkholderiales	f__Comamonadaceae	g__Variovorax		0	0	0	0	0	0	0	0	0	0	0	0	0	0	0	0	0	0	0	0	0	0	0	0	0	0	0	0	0	0
ASV_686	d__Bacteria	p__Bacteroidota	c__Bacteroidia	o__Cytophagales	f__Cytophagaceae	g__Cytophaga	s__uncultured_bacterium	0.00772461	0	0	0	0	0	0	0	0	0	0	0	0	0	0	0	0	0	0	0	0	0	0	0	0	0.00772461	0	0	0	0
ASV_687	d__Bacteria	p__Bacteroidota	c__Bacteroidia	o__Flavobacteriales	f__Flavobacteriaceae	g__Flavobacterium		0.0140667	0	0	0	0	0.000101845	0	0	0	0	0	0	0.0138379	0	0	0	0	0	0.000101	0	0	2.6024e-05	0	0	0	0	0	0	0	0
ASV_688	d__Bacteria	p__Proteobacteria	c__Gammaproteobacteria	o__Burkholderiales	f__Gallionellaceae	g__Gallionella	s__uncultured_bacterium	0.00577743	0	0	0	0	0	0	0	0	9.01578e-05	0	0	0	9.11845e-05	0.000486543	0.00462002	0.000216513	0	0	0	0	0	0.000146829	0	7.87439e-05	0	4.74376e-05	0	0	0
ASV_689	d__Bacteria	p__Proteobacteria	c__Gammaproteobacteria	o__Burkholderiales	f__Comamonadaceae	g__Brachymonas		0.00176806	0	0	0	0	0	0	0	0	0	0	0	0	0	0	0	0.000392804	0	0	0	0	9.10842e-05	0	0	0	0	0	0.00128417	0	0
ASV_690	d__Bacteria	p__Proteobacteria	c__Gammaproteobacteria	o__Burkholderiales	f__Oxalobacteraceae	g__Undibacterium	s__uncultured_bacterium	0.0040681	0	0	0	0	0	0	0	0	0	0	0	0	0	0	0	0	0	0	0	0	0	0	0	0	0.0040681	0	0	0	0
ASV_691	d__Bacteria	p__Proteobacteria	c__Alphaproteobacteria	o__Rhizobiales	f__Beijerinckiaceae			0.000842849	0	0	0	0.000394762	8.72956e-05	0.000144645	0	0	0	8.98473e-05	0	0	0	0	0	0.000126299	0	0	0	0	0	0	0	0	0	0	0	0	0
ASV_692	d__Bacteria	p__Fusobacteriota	c__Fusobacteriia	o__Fusobacteriales	f__Fusobacteriaceae	g__Fusobacterium	s__uncultured_bacterium	0.0055766	0	0	0	0	0	0	0	0	0	5.98982e-05	0	0	0	9.33195e-05	0.00455616	0.000234555	0	0	0	0	0	0.000277343	0	6.29951e-05	0	0	0	0.000234783	5.75506e-05
ASV_693	d__Bacteria	p__Proteobacteria	c__Gammaproteobacteria	o__Burkholderiales	f__Comamonadaceae	g__uncultured		0.0125485	0	0	0	0	0	0	0	0	0	0	0	0	0	0	0	0	0	0	0	0	0	0	0.000565344	0.0119295	0	0	0	5.36209e-05	0
ASV_694	d__Archaea	p__Crenarchaeota	c__Bathyarchaeia	o__Bathyarchaeia	f__Bathyarchaeia	g__Bathyarchaeia		0.00519449	0	0	0	0	0	0	0	0	0	0	0	0	0	0	0.00519449	0	0	0	0	0	0	0	0	0	0	0	0	0	0
ASV_695	d__Bacteria	p__Proteobacteria	c__Gammaproteobacteria	o__Burkholderiales	f__Comamonadaceae			0	0	0	0	0	0	0	0	0	0	0	0	0	0	0	0	0	0	0	0	0	0	0	0	0	0	0	0	0	0
ASV_696	d__Bacteria	p__Firmicutes	c__Negativicutes	o__Veillonellales-Selenomonadales	f__Veillonellaceae	g__Veillonella	s__uncultured_bacterium	0.0185901	0	0	0	0	0	0	0	0	0	0	0	0	0	0	0	0.000274963	2.23404e-05	6.81827e-05	0.0131704	0	0	0	0	0	0	0	0	0	0.0050542
ASV_697	d__Bacteria	p__Verrucomicrobiota	c__Verrucomicrobiae	o__Verrucomicrobiales	f__Rubritaleaceae	g__Luteolibacter		0.000121327	0	0	0	4.00737e-05	0	0	0	0	0	0	0	0	0	0	0	0	0	0	8.12533e-05	0	0	0	0	0	0	0	0	0	0
ASV_698	d__Bacteria	p__Actinobacteriota	c__Actinobacteria	o__Micrococcales	f__Micrococcaceae	g__Rothia	s__uncultured_bacterium	0.0159714	0	0	0	0	0	0	0.000392972	0.0134064	0.000594566	0.000129779	0	0	0	0	0	0	0	7.57655e-05	0	0	0.00137191	0	0	0	0	0	0	0	0
ASV_699	d__Bacteria	p__Proteobacteria	c__Alphaproteobacteria	o__Caulobacterales	f__Caulobacteraceae	g__Brevundimonas	s__Brevundimonas_sp.	0.000733478	0	0	0	0	0	0	0	0.000110644	0	0	0	0	0	9.11374e-05	0	0	0	7.57655e-05	0	0	0.000231622	0	0	0.00022431	0	0	0	0	0
ASV_700	d__Bacteria	p__Fusobacteriota	c__Fusobacteriia	o__Fusobacteriales	f__Leptotrichiaceae	g__Leptotrichia	s__uncultured_bacterium	0.0170181	0	0	0	0	0	0	0	0	0	0	0	0	0	0	0	0.000235682	3.68883e-05	0	0.0159119	0	0	0	0	0	0	0	0.00073381	0	9.97539e-05
ASV_701	d__Bacteria	p__Bacteroidota	c__Bacteroidia	o__Sphingobacteriales	f__Sphingobacteriaceae	g__Pedobacter		0.00709773	0	0	0	0	0	0.000105197	0	0	0	0	0	0	0	0	9.36999e-05	0	0	0	0	0	0	0.000163143	0.000527805	0.00620789	0	0	0	0	0
ASV_702	d__Bacteria	p__Firmicutes	c__Bacilli	o__Lactobacillales	f__Streptococcaceae	g__Streptococcus		0	0	0	0	0	0	0	0	0	0	0	0	0	0	0	0	0	0	0	0	0	0	0	0	0	0	0	0	0	0
ASV_703	d__Bacteria	p__Actinobacteriota	c__Actinobacteria	o__Micrococcales	f__Dermabacteraceae	g__Brachybacterium		0.00665228	0	0	0	0	0	0	0	0	0	0	0.00384067	0	0	0	0	0	0	0.00263285	0.000178757	0	0	0	0	0	0	0	0	0	0
ASV_704	d__Bacteria	p__Proteobacteria	c__Alphaproteobacteria	o__Rickettsiales	f__SM2D12	g__SM2D12		0.00760368	0	0	0	0	0	0	0	0	0	0	7.91891e-05	0	0	0	0	0.000108256	0	0	0.000130005	0	0	0	0	0	0.00228482	0	8.80251e-05	0	0.00491339
ASV_705	d__Bacteria	p__Patescibacteria	c__Parcubacteria					0.00633007	0.000332431	0	0	0	0	0	0	0	0	5.98982e-05	0	0	0	0	0	7.21709e-05	0	0	6.50026e-05	0	0	0	0	0	0	0	5.2815e-05	2.29804e-05	0.00605721
ASV_706	d__Bacteria	p__Actinobacteriota	c__Actinobacteria	o__Micrococcales	f__Cellulomonadaceae	g__Cellulomonas		0.00359233	0.000332431	0	0	0	0	0	0	0	0	6.81651e-05	0	0	0.00114007	0	0	5.41282e-05	0.00199202	0	0	0	0	0	0.000337952	0	0	0	0	0	0
ASV_707	d__Bacteria	p__Actinobacteriota	c__Actinobacteria	o__Micrococcales	f__Micrococcaceae	g__Rothia	s__uncultured_bacterium	0.0123795	0.000332431	0	0	0	0	0	0	0	0	0	0	0	0	0	0	0	2.94416e-05	0	0	7.07547e-05	0	0	0.0121996	7.97006e-05	0	0	0	0	0
ASV_709	d__Bacteria	p__Myxococcota	c__Myxococcia	o__Myxococcales	f__Myxococcaceae	g__P3OB-42		0.00729824	0.000332431	0	0	8.01475e-05	0	0	3.60198e-05	0	0	0	0	0	1.49645e-05	0	0	0	4.71065e-05	0	0	2.35849e-05	0	0	2.92082e-05	0	0.00699017	7.70396e-05	0	0	0
ASV_710	d__Bacteria	p__Proteobacteria	c__Gammaproteobacteria	o__Xanthomonadales	f__Rhodanobacteraceae			0.0221203	0.000332431	0	0	0	0	0	0.000360015	0.0210599	0.000376883	0.000169711	0	0	0	0	0	0	0	0.0001212	0	0	3.25301e-05	0	0	0	0	0	0	0	0
ASV_711	d__Bacteria	p__Caldatribacteriota	c__JS1	o__JS1	f__JS1	g__JS1	s__uncultured_bacterium	0.000301514	0.000332431	0	0	0	0	0	0	0	0	0	0	0.000301514	0	0	0	0	0	0	0	0	0	0	0	0	0	0	0	0	0
ASV_712	d__Bacteria	p__Firmicutes	c__Bacilli	o__Thermoactinomycetales	f__Thermoactinomycetaceae	g__Planifilum	s__uncultured_compost	0.0057163	0.000332431	0	0	0	0	0	0.00013048	0.0049421	0.00026723	5.98982e-05	0	0	2.25756e-05	0	0	0	2.97872e-05	0	0	0.00022244	0	0	0	0	4.17955e-05	0	0	0	0
ASV_713	d__Bacteria	p__Fusobacteriota	c__Fusobacteriia	o__Fusobacteriales	f__Fusobacteriaceae	g__Fusobacterium		0.00575033	0.000332431	0	0	0	4.36478e-05	0	0	0.000136799	0	0	0	8.05464e-05	0	0.000192094	0	0	0	0.0001313	0	3.93082e-05	0.00506138	6.52571e-05	0	0	0	0	0	0	0
ASV_714	d__Bacteria	p__Firmicutes	c__Bacilli	o__Staphylococcales	f__Staphylococcaceae	g__Staphylococcus		0	0.000332431	0	0	0	0	0	0	0	0	0	0	0	0	0	0	0	0	0	0	0	0	0	0	0	0	0	0	0	0
ASV_715	d__Bacteria	p__Firmicutes	c__Bacilli	o__Paenibacillales	f__Paenibacillaceae	g__Paenibacillus		0.00633347	0.000332431	0	0	0	0	1.66594e-05	0	0	0	0	0	0	0	0	0	0	0	0	0	0	0	0	0	0	0	0	0	0.00627365	4.3163e-05
ASV_716	d__Bacteria	p__Bacteroidota	c__Kapabacteria	o__Kapabacteriales	f__Kapabacteriales	g__Kapabacteriales		0.000487266	0.000332431	0	0	0.000117233	0	0	0	0	0	0	0	0	0	0	0	3.60855e-05	0.000275531	0	0	0	0	0	5.84163e-05	0	0	0	0	0	0
ASV_717	d__Bacteria	p__Latescibacterota	c__Latescibacterota	o__Latescibacterota	f__Latescibacterota	g__Latescibacterota	s__uncultured_bacterium	0.00644217	0.000332431	0	0	0	0	0	0	0	0	0	0	0	0	0	0	0	0	0	0	0	0	0	0	0	0	0	0	0.00644217	0
ASV_718	d__Bacteria	p__Firmicutes	c__Clostridia	o__Peptostreptococcales-Tissierellales	f__Peptostreptococcales-Tissierellales	g__Anaerococcus	s__uncultured_bacterium	0.00078351	0.0104109	0	0	0	0	0	0	0	0	0	0	0	0	0	0	0	0	0	0.000373765	0	0	4.49559e-05	0	0	0	0	0.000264075	0	0.000100714
ASV_719	d__Archaea	p__Crenarchaeota	c__Bathyarchaeia	o__Bathyarchaeia	f__Bathyarchaeia	g__Bathyarchaeia		0.00490167	0.0104109	0	0	0	0	0	0	0	0	0	0	0	0	0	0.00490167	0	0	0	0	0	0	0	0	0	0	0	0	0	0
ASV_720	d__Bacteria	p__Patescibacteria	c__Parcubacteria					0.014605	0.0104109	0	0	0	0	0	0	0	0	1.99661e-05	0	0	0	0	0	0.000108256	0	0	0.000146256	0	0	0	0	0	0	0	0.0143305	0	0
ASV_721	d__Bacteria	p__Acidobacteriota	c__Vicinamibacteria	o__Vicinamibacterales	f__Vicinamibacteraceae	g__Vicinamibacteraceae	s__uncultured_bacterium	0.011805	0.0104109	0	0	0	0	0	0	0	0	0	0.000121724	0	0	0	0	0	4.71065e-05	0	0	0	0	0	0.011581	5.51207e-05	0	0	0	0	0
ASV_722	d__Bacteria	p__Proteobacteria	c__Alphaproteobacteria	o__Parvibaculales	f__Parvibaculaceae	g__Parvibaculum	s__uncultured_bacterium	0.000507346	0.0104109	0	0	0	0	0	0	0	0	0	0	0	0	4.05055e-05	0	0	0	2.84121e-05	0	0	0.000106902	0	0	0	5.57274e-05	3.95313e-05	0.000236268	0	0
ASV_724	d__Bacteria	p__Proteobacteria	c__Alphaproteobacteria	o__Rhizobiales	f__Rhizobiaceae	g__Allorhizobium-Neorhizobium-Pararhizobium-Rhizobium		0.000228865	0.0104109	0	0	0	0	0	0	0	0	0	0	0	0	0	0	0	0	0	0	0	0	0	0	0	0	0	0.000228865	0	0
ASV_725	d__Bacteria	p__Proteobacteria	c__Gammaproteobacteria	o__Burkholderiales	f__Comamonadaceae	g__Polaromonas		0.00328043	0.0104109	0.000176928	0.000155503	0	0	4.99781e-05	3.60198e-05	0	0	0.00315321	0	0	0	0	0	0	4.12182e-05	0	0	0	0	0	0	0	0	0	0	0	0
ASV_726	d__Bacteria	p__Patescibacteria	c__Parcubacteria	o__Candidatus_Yanofskybacteria	f__Candidatus_Yanofskybacteria	g__Candidatus_Yanofskybacteria	s__uncultured_bacterium	0.000214804	0.0100785	0	0	0	0	0	0	0	0	0	0.000182585	3.22186e-05	0	0	0	0	0	0	0	0	0	0	0	0	0	0	0	0	0
ASV_727	d__Bacteria	p__Desulfobacterota	c__Desulfuromonadia	o__Geobacterales	f__Geobacteraceae	g__Geobacter		0.00609837	0.0100785	0	0	0	0	0	0	0	0	0	0	0	0	8.53752e-05	0.00585889	7.21709e-05	0	0	0	0	0	3.59648e-05	0	0	0	0	0	4.59608e-05	0
ASV_728	d__Bacteria	p__Patescibacteria	c__Saccharimonadia	o__Saccharimonadales	f__Saccharimonadales	g__Saccharimonadales	s__uncultured_bacterium	0.00839207	0.0100785	0	0	0	8.72956e-05	0	0	0.000136799	0	0	0	0	0	0.000192094	0	0	0	0.00788809	4.8752e-05	0	3.90361e-05	0	0	0	0	0	0	0	0
ASV_729	d__Bacteria	p__Bacteroidota	c__Bacteroidia	o__Cytophagales	f__Hymenobacteraceae	g__Nibribacter		0.00087113	0.0100785	0	0	0	0	8.32968e-06	0.000521921	0	0	0	0	0	0	0	0	0	2.35532e-05	2.96707e-05	0.000146256	0	0	1.79824e-05	0	7.00967e-05	0	5.33208e-05	0	0	0
ASV_730	d__Bacteria	p__Firmicutes	c__Clostridia	o__Oscillospirales	f__Ruminococcaceae	g__Faecalibacterium	s__uncultured_bacterium	0.000258363	0.0100785	0	0	0	2.90985e-05	0	0	0	0	0	0	0	0	0	0	0	0	0.0001515	0	0	0	0	0	0	7.77645e-05	0	0	0	0
ASV_731	d__Bacteria	p__Proteobacteria	c__Gammaproteobacteria	o__Pseudomonadales	f__Moraxellaceae	g__Alkanindiges	s__uncultured_bacterium	0.00087574	0.0100785	0	0	0	0	0	0	0	0	5.45321e-05	8.11491e-05	0.000391968	0	7.08846e-05	0	0	0	6.62948e-05	0	0	0	0	0	0	0	0	0	0.000117392	9.35198e-05
ASV_732	d__Bacteria	p__Firmicutes	c__Clostridia	o__Lachnospirales	f__Lachnospiraceae	g__Fusicatenibacter	s__uncultured_bacterium	0.00587035	0.0100785	0	0	0	0	0	0	0	0	0	0	0	0	0.000149407	0	0	0	0.000101	0	0.000515634	0.00499011	0.0001142	0	0	0	0	0	0	0
ASV_733	d__Bacteria	p__Proteobacteria	c__Gammaproteobacteria	o__Enterobacterales	f__Enterobacteriaceae	g__Escherichia-Shigella	s__Escherichia_coli	0.00559946	0.0100785	0	0	0	0	0	0	0	0	0	0	0	0	0	0	0	0	0	0	0	0.00525686	0.0003426	0	0	0	0	0	0	0
ASV_735	d__Bacteria	p__Chloroflexi	c__Anaerolineae	o__SBR1031	f__A4b	g__A4b		0.00309096	0.0100785	0	0	0	0	0	0	0	0	0	0	0	1.8813e-05	0	0	0	0.0030234	0	4.8752e-05	0	0	0	0	0	0	0	0	0	0
ASV_736	d__Bacteria	p__Patescibacteria	c__Parcubacteria	o__Parcubacteria	f__Parcubacteria	g__Parcubacteria	s__uncultured_bacterium	0.01173	0.0100785	0	0	0.000100184	0	0	0	0	0	0	0	0	2.99291e-05	0	0	0	4.71065e-05	0	0	0	0	0	0.0114934	4.2058e-05	1.7281e-05	0	0	0	0
ASV_738	d__Bacteria	p__Proteobacteria	c__Gammaproteobacteria	o__Burkholderiales	f__Burkholderiaceae	g__Burkholderia-Caballeronia-Paraburkholderia		0.00603235	0.0100785	0	0	0	0	0	0	0	0	9.98303e-05	0	0	0	0	0	0	0	0	0	0	0	0	0	0	0	0	0	0.000205435	0.00572709
ASV_739	d__Bacteria	p__Proteobacteria	c__Gammaproteobacteria	o__Pseudomonadales	f__Moraxellaceae	g__Moraxella	s__uncultured_bacterium	0	0.0100785	0.00654906	0.00352942	0	0	0	0	0	0	0	0	0	0	0	0	0	0	0	0	0	0	0	0	0	0	0	0	0	0
ASV_740	d__Bacteria	p__Proteobacteria	c__Gammaproteobacteria	o__Pseudomonadales	f__Moraxellaceae	g__uncultured		0.0211629	0	0	0	0.000846646	0.0197333	0.000164815	0	0	0	0	0	0.000150757	0	0.000121517	0	0	0	5.68241e-05	0	0	8.90853e-05	0	0	0	0	0	0	0	0
ASV_741	d__Bacteria	p__Proteobacteria	c__Gammaproteobacteria	o__Burkholderiales	f__Comamonadaceae			0.00137745	0	0	0	0	0	0	0	0	0	0	0	0	0	0	0	0	0	0	0.000414766	0	0	0	0.000584163	0.000378522	0	0	0	0	0
ASV_742	d__Bacteria	p__Actinobacteriota	c__Acidimicrobiia	o__Microtrichales	f__uncultured	g__uncultured	s__uncultured_bacterium	0.00560129	0	0	0	0	5.81971e-05	0	0	5.47196e-05	0	0	0	8.05464e-05	0	8.53752e-05	0	0	0	9.08999e-05	0	3.14465e-05	0.00506959	0.000130514	0	0	0	0	0	0	0
ASV_743	d__Bacteria	p__Firmicutes	c__Bacilli	o__Erysipelotrichales	f__Erysipelatoclostridiaceae	g__Erysipelotrichaceae_UCG-003	s__uncultured_bacterium	0.00427365	0	0	0	0	0.000217061	0	0	7.37626e-05	0	0	0	0	0	5.06319e-05	0	0	5.98352e-05	0.00357045	0.000195008	0	0.000106902	0	0	0	0	0	0	0	0
ASV_745	d__Bacteria	p__Proteobacteria	c__Alphaproteobacteria	o__Sphingomonadales	f__Sphingomonadaceae	g__Sandaracinobacter		0.000532918	0	0	0	0	0	0	0	0	0	0	0	0	0	4.05055e-05	0	0	0	8.05008e-05	0	0	8.90853e-05	0	0	0	0	0	0	0.000322827	0
ASV_746	d__Bacteria	p__Proteobacteria	c__Gammaproteobacteria	o__Pseudomonadales	f__Pseudomonadaceae	g__Pseudomonas		0.00586037	0	0	0	0	0	0	0	0	0	0	0	0	0	0	0	0	0	0	0	0	0	0.000107894	0	0	0	0	0	0	0.00575248
ASV_747	d__Bacteria	p__Firmicutes	c__Clostridia	o__Oscillospirales	f__Butyricicoccaceae	g__Butyricicoccus	s__uncultured_bacterium	0.00556342	0	0	0	0	0	0	0	8.20793e-05	0	0	0	8.05464e-05	0	0.000149407	0	0	0	6.05999e-05	0	8.6478e-05	0.00499011	0.0001142	0	0	0	0	0	0	0
ASV_748	d__Bacteria	p__Campilobacterota	c__Campylobacteria	o__Campylobacterales	f__Campylobacteraceae	g__Campylobacter		0.00470238	0	0	0	0	0	0	0	0	0	0	0	0	1.49645e-05	4.05055e-05	0.00449425	0	0	0	0	0	0	8.15714e-05	0	1.57488e-05	0	5.53438e-05	0	0	0
ASV_749	d__Bacteria	p__Actinobacteriota	c__Actinobacteria	o__Actinomycetales	f__Actinomycetaceae	g__Actinomyces		0.0067259	0	0	0	0	0	0	0	0	0	0	0	0	0	0.00017075	0.00156362	0.000117841	0	0	0	0.00139937	0.00347433	0	0	0	0	0	0	0	0
ASV_750	d__Bacteria	p__Actinobacteriota	c__Actinobacteria	o__Propionibacteriales	f__Propionibacteriaceae	g__Cutibacterium		0.00730085	0	0	0	0	0	0	0	0	0	0	0	0	0	0	0	0	0	0	0	0	0	0.00730085	0	0	0	0	0	0	0
ASV_752	d__Bacteria	p__Bacteroidota	c__Bacteroidia	o__Cytophagales	f__Spirosomaceae	g__Emticicia		0.00385355	0	0	0	0	0.000135663	0.000255443	0	5.5322e-05	0	0.000299926	0	0	0	3.03791e-05	0	0	0	0.00293118	5.6559e-05	0	8.90853e-05	0	0	0	0	0	0	0	0
ASV_753	d__Bacteria	p__Bdellovibrionota	c__Bdellovibrionia	o__Bdellovibrionales	f__Bdellovibrionaceae	g__Bdellovibrio	s__uncultured_bacterium	0.00389372	0	0	0	0	0	0	0	0	0	2.27217e-05	0	0	0	0	0	0	0	0	0.000131971	0	0	0	0	0	0.00355125	0	8.80251e-05	0	9.97539e-05
ASV_754	d__Bacteria	p__Firmicutes	c__Clostridia	o__Oscillospirales	f__Ruminococcaceae	g__Subdoligranulum	s__uncultured_bacterium	0.0109402	0	0	0	0	0.00010853	0	0	0.000147525	0	0	0	0	0	6.07583e-05	0	0	0	0.00127854	0	0.000133464	0.00921142	0	0	0	0	0	0	0	0
ASV_755	d__Bacteria	p__Actinobacteriota	c__Actinobacteria	o__Micrococcales	f__Micrococcaceae			0.0210289	0	0	0	0	0	0	0	0	0	0	0	0	0	0	0	0	0	0	0	0	0	0	0	0	0	0	0	0.0208562	0.000172652
ASV_756	d__Bacteria	p__Proteobacteria	c__Alphaproteobacteria	o__Sphingomonadales	f__Sphingomonadaceae	g__Sphingomonas		0.00768769	0	0	0	0	0	0	0	0	0.000276167	0	0	0	0	0	4.35066e-05	0	0	0	0	0.000209398	0.00019148	0.00692118	0	0	0	0	0	4.59608e-05	0
ASV_757	d__Bacteria	p__Actinobacteriota	c__Actinobacteria	o__Micromonosporales	f__Micromonosporaceae	g__Micromonospora		0.00386179	0	0	0	0	0	0	0	0	0	0	0	0	0	0	0	0	0	0.00379678	6.50026e-05	0	0	0	0	0	0	0	0	0	0
ASV_758	d__Bacteria	p__Firmicutes	c__Clostridia	o__Peptostreptococcales-Tissierellales	f__Peptostreptococcales-Tissierellales	g__Murdochiella		0.00368858	0	0	0	0.000234467	0	0	0.000173974	0	0	0	0.000197973	0	4.13885e-05	0	0	0	0.00275774	6.94413e-05	0.000130005	0	0	0	0	0	8.35911e-05	0	0	0	0
ASV_759	d__Bacteria	p__Patescibacteria	c__Parcubacteria					0.00031532	0	0	0	0	0	0	0	0	0	0	0	0.000144984	0	0	0	0	0	0.0001313	0	0	3.90361e-05	0	0	0	0	0	0	0	0
ASV_760	d__Bacteria	p__Proteobacteria	c__Gammaproteobacteria	o__Burkholderiales	f__Rhodocyclaceae	g__Zoogloea	s__uncultured_bacterium	0.00707634	0	0	0	0	0	0	0	0	0	0	0	0	0	0	0	0	0	0	0	0	0	0	0.00100552	0.00600757	0	6.32501e-05	0	0	0
ASV_761	d__Bacteria	p__Actinobacteriota	c__Actinobacteria	o__Frankiales	f__Geodermatophilaceae	g__Blastococcus		0.00337427	0	0	0	0	0	0	0	0	0	0	0	0	0	0	0	0	0.00289308	8.07999e-05	0	0.000400391	0	0	0	0	0	0	0	0	0
ASV_762	d__Bacteria	p__RCP2-54	c__RCP2-54	o__RCP2-54	f__RCP2-54	g__RCP2-54	s__uncultured_bacterium	0.00122503	0	0	0	0	0	0	0	0	0	0	6.08618e-05	4.83279e-05	0.00093794	0	4.35066e-05	0	2.94416e-05	0	0	6.28931e-05	0	0	0	4.2058e-05	0	0	0	0	0
ASV_763	d__Bacteria	p__Proteobacteria	c__Alphaproteobacteria	o__Rhizobiales	f__Beijerinckiaceae	g__uncultured		0.00409068	0	0	0	0	0	0	0	0	0	0	0	0	0.00390076	4.05055e-05	7.72492e-05	7.21709e-05	0	0	0	0	0	0	0	0	0	0	0	0	0
ASV_764	d__Bacteria	p__Patescibacteria	c__Parcubacteria	o__Candidatus_Nomurabacteria	f__Candidatus_Nomurabacteria	g__Candidatus_Nomurabacteria		0.00750223	0	0	0	0	0	0	0	0	0	0	0	0	0	0	0	0	0.000763296	0	0.00599585	0	0	0	0	0	0.000743083	0	0	0	0
ASV_765	d__Bacteria	p__Patescibacteria	c__Parcubacteria	o__Candidatus_Azambacteria	f__Candidatus_Azambacteria	g__Candidatus_Azambacteria		0.00383599	0	0	0	0	0	0	0	3.68813e-05	0	0	0	0	0	0	0	0	0	0.00374566	0	0	5.34512e-05	0	0	0	0	0	0	0	0
ASV_766	d__Bacteria	p__Proteobacteria	c__Gammaproteobacteria					0.0569668	0	0	0	0.000762016	0	0	0.000695894	0	0	0	0	0	7.52519e-05	0	0	0	8.93615e-05	0	0	0	0	0	0.0550194	0.000157672	0.000167182	0	0	0	0
ASV_767	d__Bacteria	p__Proteobacteria	c__Gammaproteobacteria	o__Enterobacterales	f__Enterobacteriaceae	g__Citrobacter		0.00820226	0	0	0	0	0.000232788	0	0	0	0	0	0	0	0	0.000576283	0	0	0	0.00739319	0	0	0	0	0	0	0	0	0	0	0
ASV_769	d__Bacteria	p__Actinobacteriota	c__Actinobacteria	o__Pseudonocardiales	f__Pseudonocardiaceae	g__Actinomycetospora		0.0208123	0	0	0	0.000220406	0.0189386	0.000262992	0	0	0	0	0	6.03027e-05	0	0	0	0	0	0	0	0	0	0	0	0	0	0	0	0	0.00133005
ASV_770	d__Bacteria	p__Bacteroidota	c__Bacteroidia	o__Cytophagales	f__Spirosomaceae	g__Spirosoma		0.000301639	0	0	0	0	0	0	0	9.22033e-05	0	0	0	0	0	3.03791e-05	0	0	0	8.99715e-05	0	0	8.90853e-05	0	0	0	0	0	0	0	0
ASV_771	d__Bacteria	p__Proteobacteria	c__Gammaproteobacteria	o__Burkholderiales	f__Methylophilaceae			0.0125104	0	0	0	0	0	0	0	0	0	0	0	0	0	0.0103091	0	0	0	0	0	0	0	0	0	0	0	0	0	0	0.00220131
ASV_772	d__Bacteria	p__Bdellovibrionota	c__Oligoflexia	o__0319-6G20	f__0319-6G20	g__0319-6G20	s__uncultured_bacterium	0.00150955	0	0	0	0.000100184	0	0	3.60198e-05	0	0	0	0.000301369	0	6.98345e-05	0	0	0	0.000626659	0	0	0.000188495	0	0	7.30204e-05	0	2.59215e-05	0	0	8.80437e-05	0
ASV_773	d__Bacteria	p__Firmicutes	c__Bacilli	o__Staphylococcales	f__Staphylococcaceae	g__Staphylococcus		0	0	0	0	0	0	0	0	0	0	0	0	0	0	0	0	0	0	0	0	0	0	0	0	0	0	0	0	0	0
ASV_774	d__Bacteria	p__Patescibacteria	c__ABY1	o__Candidatus_Magasanikbacteria	f__Candidatus_Magasanikbacteria	g__Candidatus_Magasanikbacteria	s__uncultured_bacterium	0.00788569	0	0	0	0	5.81971e-05	0	0	0	0	0	0	0	0	0	0	0	0	0.00782749	0	0	0	0	0	0	0	0	0	0	0
ASV_775	d__Bacteria	p__Proteobacteria	c__Alphaproteobacteria	o__Acetobacterales	f__Acetobacteraceae	g__Roseomonas		0.00427763	0	0	0	0	0	5.25984e-05	0	0	0	0	0	0	0	0	0	0	0.00178723	0	0	0.000177952	0	0.000146829	0	0.00211302	0	0	0	0	0
ASV_776	d__Bacteria	p__Bdellovibrionota	c__Bdellovibrionia	o__Bdellovibrionales	f__Bdellovibrionaceae	g__Bdellovibrio		0.00551844	0	0	0	0	0	0	0	0	0	0	0	0	0	0	0	0	0	0	0.000195008	0	0	0	0	0	0	0	0	0	0.00532343
ASV_777	d__Bacteria	p__Gemmatimonadota	c__Gemmatimonadetes	o__Gemmatimonadales	f__Gemmatimonadaceae	g__Gemmatimonas		0.0114683	0	0	0	0.000473415	0.0107401	0.000118346	0	0	0	0	0	0	0	0	0	0	0	9.08999e-05	0	0	4.55421e-05	0	0	0	0	0	0	0	0
ASV_778	d__Bacteria	p__Bdellovibrionota	c__Oligoflexia	o__0319-6G20	f__0319-6G20	g__0319-6G20	s__uncultured_bacterium	0.00548794	0	0	0	0	0	0	0	0	0	0	0	0	0	0	0	0	0	0	0.000130005	0	0	0	0	0	0	0	5.2815e-05	5.36209e-05	0.0052515
ASV_779	d__Bacteria	p__Actinobacteriota	c__Actinobacteria	o__Kineosporiales	f__Kineosporiaceae			0.00691422	0	0	0	0	0	0	0	0	0	0	0	0	0	0	0	0	0	0	0	0	0	0.00691422	0	0	0	0	0	0	0
ASV_781	d__Bacteria	p__Patescibacteria	c__Parcubacteria	o__Candidatus_Nomurabacteria	f__Candidatus_Nomurabacteria	g__Candidatus_Nomurabacteria		0.0078014	0	0	0	0	8.72956e-05	0	0	0	0	0	0	0.000128874	0	0.000149407	0	0	0	0.00740329	0	0	3.25301e-05	0	0	0	0	0	0	0	0
ASV_782	d__Bacteria	p__Patescibacteria	c__Parcubacteria	o__Candidatus_Yanofskybacteria	f__Candidatus_Yanofskybacteria	g__Candidatus_Yanofskybacteria	s__uncultured_bacterium	0.00586603	0	0	0	0	0	0	0	0	0	0	0	0	0	0	2.90044e-05	0	0	0	0	0	0	0	0	0	0	0	0	0.00583702	0
ASV_783	d__Bacteria	p__Bacteroidota	c__Bacteroidia	o__Bacteroidales	f__Prevotellaceae	g__Prevotella	s__uncultured_bacterium	0.00100377	0	0	0	0	0	0	0	0	0	0	0	0	0	0	0	0.000196402	0	0	0	0	0	0	0	7.35556e-05	0	0	0.00073381	0	0
ASV_784	d__Bacteria	p__Firmicutes	c__Clostridia	o__Peptostreptococcales-Tissierellales	f__Anaerovoracaceae	g__Mogibacterium		0.00119425	0	0	0	0	0	0	0	0	0	1.3633e-05	0	0	0	0	0	0.000353523	0	0	0.000263942	0	0	0	7.30204e-05	3.14976e-05	0	0	0.000458631	0	0
ASV_785	d__Bacteria	p__Proteobacteria	c__Gammaproteobacteria	o__Burkholderiales	f__Comamonadaceae			0.00491854	0	0	0	0	0	0	0	0	0	0	0	0	0	0	0	0	0	0	0	0	0.00491854	0	0	0	0	0	0	0	0
ASV_786	d__Bacteria	p__Patescibacteria	c__Parcubacteria					0.00443731	0	0	0	0	0	0	0	0	0	0	0	0	0	0	0	0	1.76649e-05	0	0.000211258	0	0	0	0	0	0	0	0	0	0.00420839
ASV_787	d__Bacteria	p__Actinobacteriota	c__Actinobacteria	o__Actinomycetales	f__Actinomycetaceae	g__Actinomyces		0.0058019	0	0	0	0	0	0	0	0	0	0	0	0	4.48936e-05	0	0	0.000126299	0	0	0	8.89759e-05	5.34512e-05	0.000701514	0	0	0	1.58125e-05	0.00477096	0	0
ASV_788	d__Bacteria	p__Actinobacteriota	c__Actinobacteria	o__Corynebacteriales	f__Corynebacteriaceae	g__Lawsonella	s__uncultured_bacterium	0.0038937	0	0	0	0	0	0	0	0	0	0	0	0	0	0	0	0	0	0.00034568	0	0.00115566	0.00161013	0.000782233	0	0	0	0	0	0	0
ASV_789	d__Bacteria	p__Firmicutes	c__Bacilli	o__Staphylococcales	f__Staphylococcaceae	g__Staphylococcus		0	0	0	0	0	0	0	0	0	0	0	0	0	0	0	0	0	0	0	0	0	0	0	0	0	0	0	0	0	0
ASV_790	d__Bacteria	p__Nitrospirota	c__Thermodesulfovibrionia	o__uncultured	f__uncultured	g__uncultured		0.00440929	0	0	0	0	0	0	0	0	0	0	0	0	0	0	0.00421289	0.000196402	0	0	0	0	0	0	0	0	0	0	0	0	0
ASV_791	d__Bacteria	p__Elusimicrobiota	c__Lineage_IIb	o__Lineage_IIb	f__Lineage_IIb	g__Lineage_IIb	s__uncultured_bacterium	0.0127823	0	0	0	0	0	0	0	0	0	0	0	0	0	0	0	0.000144342	0	0	0.000211258	0	0	0	0	0	0.000105628	0	0.0122707	0	5.03568e-05
ASV_792	d__Bacteria	p__Bacteroidota	c__Bacteroidia	o__Sphingobacteriales	f__env.OPS_17	g__env.OPS_17	s__uncultured_bacterium	0.00307143	0	0	0	0	0	0	0	0	0	0	0	0	1.12878e-05	0	0	0	0.00270501	1.89414e-05	0.000113755	0.00022244	0	0	0	0	0	0	0	0	0
ASV_793	d__Bacteria	p__Armatimonadota	c__uncultured	o__uncultured	f__uncultured	g__uncultured		0.000159362	0	0	0	0	0	0	0	0	0	0	0	0	0	0	6.526e-05	0	1.48936e-05	1.4206e-05	6.50026e-05	0	0	0	0	0	0	0	0	0	0
ASV_794	d__Bacteria	p__Proteobacteria	c__Gammaproteobacteria	o__Burkholderiales	f__Hydrogenophilaceae	g__Tepidiphilus	s__uncultured_bacterium	0.00513213	0	0	0	0	0	0	0	0	0	0	0	0	0	0	0	0	0	0	0	0.000177952	0.00490523	4.89428e-05	0	0	0	0	0	0	0
ASV_795	d__Bacteria	p__Firmicutes	c__Negativicutes	o__Veillonellales-Selenomonadales	f__Veillonellaceae	g__Negativicoccus		0.00041553	0	0	0	0	0	0	0	8.20793e-05	0	0	0	0	0	8.53752e-05	0	0	0	0.0001212	0	0	5.20481e-05	0	0	0	4.32025e-05	3.16251e-05	0	0	0
ASV_796	d__Bacteria	p__Firmicutes	c__Bacilli	o__Lactobacillales	f__Lactobacillaceae	g__Lactobacillus		0.010227	0	0	0	0	0	0	0	0	0	0	0	0	0	0	0	0	2.23404e-05	0	0	0	0	0	0	0	0.0100131	0.000103516	8.80251e-05	0	0
ASV_797	d__Bacteria	p__Bacteroidota	c__Bacteroidia	o__Cytophagales	f__Cytophagaceae	g__Cytophaga	s__uncultured_bacterium	0	0	0	0	0	0	0	0	0	0	0	0	0	0	0	0	0	0	0	0	0	0	0	0	0	0	0	0	0	0
ASV_798	d__Bacteria	p__Bacteroidota	c__Bacteroidia	o__Chitinophagales	f__Saprospiraceae	g__uncultured	s__uncultured_bacterium	0.00458595	0	0	0	8.01475e-05	0	0	9.00495e-06	0	0	0	8.11491e-05	0	2.99291e-05	0	0	0	0.00413888	6.05999e-05	9.75039e-05	1.57233e-05	0	0	7.30204e-05	0	0	0	0	0	0
ASV_799	d__Bacteria	p__Myxococcota	c__Polyangia	o__Haliangiales	f__Haliangiaceae	g__Haliangium	s__uncultured_bacterium	0.00374307	0	0	0	0	0	0	0	0	0	0	0	0.000120605	0	3.03791e-05	0	0	2.94416e-05	0.00347826	4.8752e-05	0	3.56341e-05	0	0	0	0	0	0	0	0
ASV_800	d__Bacteria	p__Proteobacteria	c__Alphaproteobacteria	o__Rhodobacterales	f__Rhodobacteraceae	g__Paracoccus		0.0111762	0	0	0	0	0.0111762	0	0	0	0	0	0	0	0	0	0	0	0	0	0	0	0	0	0	0	0	0	0	0	0
ASV_801	d__Bacteria	p__Patescibacteria	c__Gracilibacteria	o__Candidatus_Peregrinibacteria	f__Candidatus_Peregrinibacteria	g__Candidatus_Peregrinibacteria		0.000421465	0	0	0	0	0	0	0	0	0	3.18104e-05	0	0	0	0	0	0.000314243	0	0	7.54119e-05	0	0	0	0	0	0	0	0	0	0
ASV_802	d__Archaea	p__Nanoarchaeota	c__Nanoarchaeia	o__Woesearchaeales	f__SCGC_AAA011-D5	g__SCGC_AAA011-D5		0.0130427	0	0	0	0	0	0	0	0	0	0	0	0	0	0	0	0	0	0	0	0	0.0129708	7.19295e-05	0	0	0	0	0	0	0
ASV_803	d__Bacteria	p__Proteobacteria	c__Alphaproteobacteria	o__Rhizobiales	f__Devosiaceae	g__Devosia		0.00600115	0	0	0	0	0	0.000144645	0	0	0.000225394	0	0	0	0	0	8.19874e-05	0	0	0	0	0	0	0	0	0.00554913	0	0	0	0	0
ASV_804	d__Bacteria	p__Proteobacteria	c__Gammaproteobacteria	o__Enterobacterales	f__Enterobacteriaceae	g__Citrobacter		0.0156927	0	0	0	0	0	0	0	0	0	0	0	0	0	0	0	0	0	0	0	0.00496069	0	0	0	0	0	0	0.010732	0	0
ASV_805	d__Bacteria	p__Proteobacteria	c__Alphaproteobacteria	o__Sphingomonadales	f__Sphingomonadaceae	g__Sphingomonas		0.00538099	0	0	0	0	0	0	0	0	0	0	0	0	0	0	0	0	0	0	0	0	0	0	0	0	0	0	0	0	0.00538099
ASV_806	d__Bacteria	p__Proteobacteria	c__Alphaproteobacteria	o__Sphingomonadales	f__Sphingomonadaceae	g__Sphingomonas	s__Sphingomonas_sp.	0.00710892	0	0	0	0	0	0	0	0	0.000448771	0	0	0	0	0	0	0	0	0	0	0.000172772	0.000121615	0.00636576	0	0	0	0	0	0	0
ASV_807	d__Bacteria	p__Firmicutes	c__Bacilli	o__Staphylococcales	f__Staphylococcaceae	g__Staphylococcus		0	0	0	0	0	0	0	0	0	0	0	0	0	0	0	0	0	0	0	0	0	0	0	0	0	0	0	0	0	0
ASV_808	d__Bacteria	p__Firmicutes	c__Clostridia	o__Clostridiales	f__Clostridiaceae	g__Clostridium_sensu_stricto_1	s__uncultured_bacterium	0.000885138	0	0	0	0	0	0	0	0.000136799	0	0	0	0.000144984	0	0	0	0	0	0.0001212	0	0	7.80721e-05	0	0.000341089	6.29951e-05	0	0	0	0	0
ASV_809	d__Bacteria	p__Proteobacteria	c__Alphaproteobacteria	o__Micavibrionales	f__Micavibrionaceae	g__uncultured		0.00661702	0	0	0	0	0	0	0	0	0	0	0	0	0	0	0	0	0	0	0	0	5.34512e-05	0.00656357	0	0	0	0	0	0	0
ASV_810	d__Bacteria	p__Firmicutes	c__Clostridia	o__Lachnospirales	f__Lachnospiraceae			0.00311752	0	0	0	0	0	0	0.000304454	0	0	0	0	0	0	0	0	0	0.0026734	1.89414e-05	6.50026e-05	0	0	0	0	0	5.57274e-05	0	0	0	0
ASV_811	d__Archaea	p__Crenarchaeota	c__Nitrososphaeria	o__Group_1.1c	f__Group_1.1c	g__Group_1.1c	s__uncultured_archaeon	0.0421743	0	0	0	0.0419695	0	0.000170945	0	0	0	0	0	0	3.38634e-05	0	0	0	0	0	0	0	0	0	0	0	0	0	0	0	0
ASV_812	d__Bacteria	p__Patescibacteria	c__Parcubacteria	o__Candidatus_Brennerbacteria	f__Candidatus_Brennerbacteria	g__Candidatus_Brennerbacteria	s__Parcubacteria_group	0.0032295	0	0	0	0	0	0	1.80099e-05	0	0	0	0	0	0	0	0	0	0	0	0	3.14465e-05	0	0.000962542	0	0	0.00203405	0	0.000183453	0	0
ASV_813	d__Bacteria	p__Firmicutes	c__Bacilli	o__Bacillales	f__Bacillaceae	g__Bacillus		0.000182585	0	0	0	0	0	0	0	0	0	0	0.000182585	0	0	0	0	0	0	0	0	0	0	0	0	0	0	0	0	0	0
ASV_814	d__Bacteria	p__Verrucomicrobiota	c__Verrucomicrobiae	o__S-BQ2-57_soil_group	f__S-BQ2-57_soil_group	g__S-BQ2-57_soil_group	s__uncultured_bacterium	0.000190344	0	0	0	0	0	0	0	0	0	0	0	9.04541e-05	0	0	0	0	0	0	0	0	0	0	4.38122e-05	5.60774e-05	0	0	0	0	0
ASV_815	d__Bacteria	p__Firmicutes	c__Bacilli	o__Staphylococcales	f__Gemellaceae	g__Gemella	s__uncultured_bacterium	0.00567273	0	0	0	0	0	0	0	0	0	0	0	0	3.99054e-05	0	0	0	0	0	0	0.00558962	0	0	0	0	4.32025e-05	0	0	0	0
ASV_816	d__Bacteria	p__Proteobacteria	c__Alphaproteobacteria	o__Sphingomonadales	f__Sphingomonadaceae			0.000394454	0	0	0	0	0	0	0	0	0	0	0	0	0	0	6.526e-05	0	4.71065e-05	0	0.000130005	0	0	5.39471e-05	0	9.81354e-05	0	0	0	0	0
ASV_817	d__Bacteria	p__Firmicutes	c__Clostridia	o__Peptostreptococcales-Tissierellales	f__Peptostreptococcales-Tissierellales	g__Anaerococcus	s__uncultured_bacterium	0.00477561	0	0	0	0	0	0	0	0	0	0	0	0	0	0	0	0	0	0	0	0	0.00471035	6.52571e-05	0	0	0	0	0	0	0
ASV_818	d__Bacteria	p__Proteobacteria	c__Alphaproteobacteria	o__Sphingomonadales	f__Sphingomonadaceae	g__Sphingomonas	s__uncultured_bacterium	0.0101941	0	0	0	0	0	0	0	0	0	0	0.000121724	0	0	0	0	0	0	0	0	0.000102201	0	0	0.00993078	3.93719e-05	0	0	0	0	0
ASV_820	d__Bacteria	p__Patescibacteria	c__Parcubacteria					0.00594008	0	0	0	0	0	0	0	0	7.51315e-05	0	0	0	0	0	4.09937e-05	0	0	0	0	0	0	0	0	3.14976e-05	3.4562e-05	0.0052766	7.04201e-05	0.00041087	0
ASV_821	d__Bacteria	p__Firmicutes	c__Clostridia	o__Peptostreptococcales-Tissierellales	f__Peptostreptococcales-Tissierellales	g__Anaerococcus	s__uncultured_bacterium	0.00319651	0	0	0	0	0	0	0	0	0	0	0	0.000128874	0	0	0.000380656	0	0	0	0	0	0.00268698	0	0	0	0	0	0	0	0
ASV_822	d__Bacteria	p__Proteobacteria	c__Alphaproteobacteria	o__Sphingomonadales	f__Sphingomonadaceae	g__Sphingomonas		0.00643486	0	0	0	0	0	0	0	0	0	0	0	0	0	0	0	0	0.00387451	0	0	0	0	0	0	0	0	0	0	0	0.00256035
ASV_823	d__Bacteria	p__Bacteroidota	c__Bacteroidia	o__Sphingobacteriales	f__Sphingobacteriaceae	g__Nubsella		0.00787769	0	0	0	0	0	0	0	0	0.000138083	0	0	0	0	0	0	0	0	0	0	0	0	0	0	0.000112155	3.4562e-05	0.00759288	0	0	0
ASV_824	d__Bacteria	p__Firmicutes						0.00539658	0	0	0	0	0	0	0	0	0	0	0	0	0	8.53752e-05	0.00511203	0.000108256	0	0	0	0	0	4.49559e-05	0	0	0	0	0	4.59608e-05	0
ASV_825	d__Bacteria	p__Proteobacteria	c__Alphaproteobacteria	o__Rickettsiales	f__Rickettsiaceae			0.00287127	0	0	0	0	0	0	0	0	0	0	0	0	0	5.06319e-05	0	0	2.88351e-05	0.00270862	0	0	0	0	4.38122e-05	3.93719e-05	0	0	0	0	0
ASV_827	d__Bacteria	p__Patescibacteria	c__Parcubacteria	o__Candidatus_Azambacteria	f__Candidatus_Azambacteria	g__Candidatus_Azambacteria		0.00517956	0	0	0	0	0	0	0	0	0	0	0	0	0	0	0	0	0	0	0	0	0	0	0	0	0	0	0	0	0.00517956
ASV_828	d__Bacteria	p__Proteobacteria	c__Alphaproteobacteria	o__Micavibrionales	f__Micavibrionaceae	g__uncultured		0.00697519	0	0	0	0	0	0	0	0	0.000310688	0	0	0	0	0	7.97622e-05	0	0	0	0	0.000484188	7.80721e-05	0.00579163	0	0	0	8.53133e-05	0	0.000145543	0
ASV_829	d__Bacteria	p__Bdellovibrionota	c__Bdellovibrionia	o__Bdellovibrionales	f__Bdellovibrionaceae	g__Bdellovibrio		0.00737664	0	0	0	0	0	0	0	0	0	0	0	4.83279e-05	0	0	0	0	0	0.00730229	0	0	2.6024e-05	0	0	0	0	0	0	0	0
ASV_830	d__Archaea	p__Halobacterota	c__Methanosarcinia	o__Methanosarciniales	f__Methanosarcinaceae	g__Methanosarcina		0.00284638	0	0	0	0	0	0	0	0	0	0	0	0	0	0	0.00282271	0	0	2.36767e-05	0	0	0	0	0	0	0	0	0	0	0
ASV_831	d__Archaea	p__Halobacterota	c__Methanosarcinia	o__Methanosarciniales	f__Methanosarcinaceae	g__Methanosarcina		0.0130415	0	0	0	0	0	0	0	0	0	0	0	0	0	0	5.07577e-05	0.0129908	0	0	0	0	0	0	0	0	0	0	0	0	0
ASV_832	d__Bacteria	p__Cyanobacteria	c__Cyanobacteriia	o__Cyanobacteriales	f__Phormidiaceae	g__Tychonema_CCAP_1459-11B		0.000945142	0	0	0	0	0	6.57479e-05	0	0	0	0	0	0	0	0	0.000632474	0	2.97872e-05	0	0	0	0	0.000130514	0	8.66183e-05	0	0	0	0	0
ASV_833	d__Bacteria	p__Actinobacteriota	c__Thermoleophilia	o__Solirubrobacterales	f__Solirubrobacteraceae	g__uncultured		0.00466188	0	0	0	0	0	2.62992e-05	0	0	0	0	0	0	6.86948e-05	0.000272014	0.00393289	0.000361981	0	0	0	0	0	0	0	0	0	0	0	0	0
ASV_835	d__Bacteria	p__Proteobacteria	c__Gammaproteobacteria	o__Xanthomonadales	f__Xanthomonadaceae	g__Thermomonas		0.0187353	0	0	0	0.000729412	0.0178902	4.44249e-05	0	0	0	0	0	0	0	0	0	0	0	0	0	0	7.12682e-05	0	0	0	0	0	0	0	0
ASV_837	d__Bacteria	p__Proteobacteria	c__Gammaproteobacteria	o__Burkholderiales	f__Methylophilaceae	g__uncultured		0.0055153	0	0	0	0	0	0	0	0	0	0	0	0	0	0	0	0	0	0	0	0	0	0	0	0	0	0	0	0.0055153	0
ASV_838	d__Bacteria	p__Bdellovibrionota	c__Bdellovibrionia	o__Bdellovibrionales	f__Bdellovibrionaceae	g__Bdellovibrio		0.00622211	0	0	0	4.00737e-05	0	0	0	0	0	0	8.11491e-05	0	1.99527e-05	0	0	0	4.12182e-05	0	0	0	0	0	0	0	0.00603971	0	0	0	0
ASV_839	d__Bacteria	p__Actinobacteriota	c__Actinobacteria	o__Micrococcales	f__Micrococcaceae	g__Rothia	s__uncultured_bacterium	0.020032	0	0	0	0	0	0	0	0	0	0	0.000316756	0.0197153	0	0	0	0	0	0	0	0	0	0	0	0	0	0	0	0	0
ASV_840	d__Bacteria	p__Chloroflexi	c__KD4-96	o__KD4-96	f__KD4-96	g__KD4-96		0.000213459	0	0	0	0	0	0	0	0	0	0	0	0	0	0	0	0	0	0	0.000146256	0	0	0	0	0	0	0	5.2815e-05	0	1.43877e-05
ASV_841	d__Bacteria	p__Proteobacteria	c__Alphaproteobacteria	o__Sphingomonadales	f__Sphingomonadaceae	g__Novosphingobium		0.00551088	0	0	0	0	0	0.000157795	0	0	0.000150263	0	0	0	0	0	6.44187e-05	0	0	0	0	0	0	0	0.000146041	0.00499236	0	0	0	0	0
ASV_843	d__Bacteria	p__Bacteroidota	c__Bacteroidia	o__Sphingobacteriales	f__Sphingobacteriaceae			0.000258213	0	0	0	0	0	0	0	0	0	0	0	0.000150757	0	5.06319e-05	0	0	0	5.68241e-05	0	0	0	0	0	0	0	0	0	0	0
ASV_844	d__Bacteria	p__Proteobacteria	c__Gammaproteobacteria	o__Burkholderiales	f__Methylophilaceae			0.00564507	0	0	0	0	0	0	0	0	0	0	0	0	0	0	0	0	0	0	0	0	0	0	0	0	0	0.00564507	0	0	0
ASV_845	d__Bacteria	p__Bacteroidota	c__Bacteroidia	o__Sphingobacteriales	f__Sphingobacteriaceae			0.0056976	0	0	0	0	0	0	0	0	0.000165289	0	0	0	0	0	0	0	0	0	0	0	0	0	0.000146041	0.00538627	0	0	0	0	0
ASV_846	d__Bacteria	p__Chloroflexi	c__TK10	o__TK10	f__TK10	g__TK10	s__uncultured_bacterium	0.0150333	0	0	0	0	0	0	0	0	0	0	0	0	4.99676e-05	0.0149834	0	0	0	0	0	0	0	0	0	0	0	0	0	0	0
ASV_847	d__Bacteria	p__Proteobacteria	c__Alphaproteobacteria					0.00753773	0	0	0	0	0	0	0	0	0	0	0	0	0	0	5.07577e-05	0	0	0	0	0	0	0	0	0	2.59215e-05	0.00743807	0	2.29804e-05	0
ASV_848	d__Bacteria	p__Bacteroidota	c__Bacteroidia	o__Cytophagales	f__Spirosomaceae	g__Lacihabitans		0.000733136	0	0	0	0.000140258	0	3.60953e-05	2.25124e-05	0	0	0	0.000162298	0	3.49172e-05	0	2.90044e-05	0	0.00010599	4.04e-05	0	2.35849e-05	0	0	0	0.000112155	2.59215e-05	0	0	0	0
ASV_849	d__Bacteria	p__Actinobacteriota	c__Acidimicrobiia	o__Microtrichales	f__uncultured	g__uncultured	s__uncultured_bacterium	0.00417596	0	0	0	0	0	0	0	0	0	0	0	0	3.99054e-05	0	0	0	0.00399227	0	0	7.07547e-05	0	0	7.30204e-05	0	0	0	0	0	0
ASV_850	d__Bacteria	p__Actinobacteriota	c__Actinobacteria	o__Actinomycetales	f__Actinomycetaceae	g__Actinomyces		0.00639274	0	0	0	0	0	0	0	0	0	0	0	0	0	0	0	0	0	0	0	0	0	0.00639274	0	0	0	0	0	0	0
ASV_851	d__Bacteria	p__Actinobacteriota	c__Actinobacteria	o__Corynebacteriales	f__Corynebacteriaceae	g__Corynebacterium	s__uncultured_bacterium	0.00996776	0	0	0	0	0	0	0	0	0	0	0	0	0	0	0	0	0	0	0	0	0	0	0	0.00996776	0	0	0	0	0
ASV_852	d__Bacteria	p__Planctomycetota	c__Planctomycetes	o__Planctomycetales	f__Rubinisphaeraceae	g__SH-PL14		0.00038064	0	0	0	0	0	0	8.69868e-05	0	0	0	0.000237567	0	2.25756e-05	0	0	0	3.35106e-05	0	0	0	0	0	0	0	0	0	0	0	0
ASV_853	d__Bacteria	p__Proteobacteria	c__Gammaproteobacteria	o__Burkholderiales	f__Comamonadaceae			0.0127887	0	0	0	0	0	0	0	0	0	3.18104e-05	0	0	0	0	0	0	0.000100101	0	0.0126568	0	0	0	0	0	0	0	0	0	0
ASV_854	d__Bacteria	p__Proteobacteria	c__Gammaproteobacteria	o__Burkholderiales	f__Methylophilaceae			0.0114376	0	0	0	0	0	0	0	0	0	0	0	0.0114376	0	0	0	0	0	0	0	0	0	0	0	0	0	0	0	0	0
ASV_855	d__Bacteria	p__Proteobacteria	c__Gammaproteobacteria	o__Burkholderiales	f__Oxalobacteraceae	g__Undibacterium	s__uncultured_bacterium	0.00717099	0	0	0	0	0	0	0	0	0	0	0	0	0	0	0	0	0	0.00717099	0	0	0	0	0	0	0	0	0	0	0
ASV_856	d__Bacteria	p__Firmicutes	c__Negativicutes	o__Veillonellales-Selenomonadales	f__Veillonellaceae	g__Dialister	s__uncultured_bacterium	0.0139249	0	0	0	0.000160295	0	0	0	0	0	0	0.013633	6.44371e-05	0	0	0	0	4.12182e-05	0	0	0	0	0	0	0	2.59215e-05	0	0	0	0
ASV_857	d__Bacteria	p__Actinobacteriota	c__Acidimicrobiia	o__Microtrichales	f__Iamiaceae	g__Iamia	s__uncultured_bacterium	0.00141537	0	0	0	0.00017585	0	0	0.00013048	0	0	0	7.91891e-05	0	1.8813e-05	0	0	0	2.23404e-05	0	0	0.000800783	0	0	0	0	6.96592e-05	0	0	2.29804e-05	9.52779e-05
ASV_858	d__Bacteria	p__Proteobacteria	c__Gammaproteobacteria	o__Burkholderiales	f__Rhodocyclaceae			0.00566002	0	0	0	0	0	0	0	0	0	0	0.000101436	0	0	0	0	0	0	0	0	0.00533019	0	0.0002284	0	0	0	0	0	0	0
ASV_859	d__Archaea	p__Halobacterota	c__Methanosarcinia	o__Methanosarciniales	f__Methanosarcinaceae	g__Methanosarcina		0.00472088	0	0	0	0	0	0	0	0	0	0	0	0	0	0.00017075	0.00373043	0.000144342	0	0	0	0	0	0.000587314	0	0	0	0	0	8.80437e-05	0
ASV_860	d__Archaea	p__Halobacterota	c__Methanosarcinia	o__Methanosarciniales	f__Methanosarcinaceae	g__Methanosarcina		0.0123384	0	0	0	0	0	0	0	0	0	0	0	0	0	8.53752e-05	0.000146406	0.0121067	0	0	0	0	0	0	0	0	0	0	0	0	0
ASV_861	d__Bacteria	p__Patescibacteria	c__Microgenomatia	o__Candidatus_Woesebacteria	f__Candidatus_Woesebacteria	g__Candidatus_Woesebacteria		0.00224233	0	0	0	0	0	0	0	0	0	4.99151e-05	0	0	0	0	0	0	0	0	0	0	0	3.26286e-05	0	0	0.000120967	0	0	0.00199566	4.3163e-05
ASV_862	d__Archaea	p__Crenarchaeota	c__Nitrososphaeria	o__Nitrososphaerales	f__Nitrososphaeraceae	g__Nitrososphaeraceae		0.0040818	0	0	0	0	0	0	0	0	0	0	0	0	0	0	0.0040818	0	0	0	0	0	0	0	0	0	0	0	0	0	0
ASV_863	d__Bacteria	p__Actinobacteriota	c__Actinobacteria	o__Corynebacteriales	f__Dietziaceae	g__Dietzia	s__uncultured_bacterium	0.00121538	0	0	0	0	0	0.000118346	0	0	0.000150263	0	0	0	0	0	0	0	0	0	9.75039e-05	0.000266928	0	0.0001142	0	8.66183e-05	0	0	0	0.000381523	0
ASV_865	d__Bacteria	p__Firmicutes	c__Clostridia	o__Lachnospirales	f__Lachnospiraceae			0.00358447	0	0	0	0	0.000135663	0	0	0	0	0	0	0.000180908	0	9.11374e-05	0	0	0	0.00301641	0	0	0.000160353	0	0	0	0	0	0	0	0
ASV_866	d__Bacteria	p__Acidobacteriota	c__Blastocatellia	o__11-24	f__11-24	g__11-24	s__uncultured_bacterium	0.00329082	0	0	0	0	0	0	0	7.37626e-05	0	0	0	0	0	0	0	0	2.35532e-05	0.00319351	0	0	0	0	0	0	0	0	0	0	0
ASV_867	d__Bacteria	p__Proteobacteria	c__Gammaproteobacteria	o__Vibrionales	f__Vibrionaceae	g__Vibrio		0.00933346	0	0	0	0.00263775	0.000160042	0	0	0.000246238	0	0	0	0	0	0.000298813	0	0	0	0.00583779	8.12533e-05	0	7.15661e-05	0	0	0	0	0	0	0	0
ASV_868	d__Bacteria	p__Firmicutes	c__Clostridia	o__Peptostreptococcales-Tissierellales	f__Peptostreptococcales-Tissierellales	g__Anaerococcus	s__uncultured_bacterium	0.000165659	0	0	0	0	0	0	1.80099e-05	0	0	0	0	0	1.99527e-05	0	0	0	4.12182e-05	0	0	8.6478e-05	0	0	0	0	0	0	0	0	0
ASV_869	d__Bacteria	p__Patescibacteria	c__Microgenomatia	o__Candidatus_Woesebacteria	f__Candidatus_Woesebacteria	g__Candidatus_Woesebacteria	s__Candidatus_Woesebacteria	0.00284571	0	0	0	0	0	0	0.00026096	0	0	0	0	0	0	0	0	0	0.00252819	0	5.6559e-05	0	0	0	0	0	0	0	0	0	0
ASV_870	d__Bacteria	p__Actinobacteriota	c__Thermoleophilia	o__Gaiellales	f__Gaiellaceae	g__Gaiella	s__uncultured_bacterium	0.00971553	0	0	0	0	0	0	0	0	0	0	0	0	3.49172e-05	0	0	0	4.71065e-05	0	0	7.07547e-05	0	0	0.00949265	7.00967e-05	0	0	0	0	0
ASV_871	d__Bacteria	p__Actinobacteriota	c__Actinobacteria	o__Corynebacteriales	f__Mycobacteriaceae	g__Mycobacterium	Ambiguous_taxa	0.000176329	0	0	0	0	0	0	0	0	0	0	0	0	0	0	5.85624e-05	0	0.000117766	0	0	0	0	0	0	0	0	0	0	0	0
ASV_872	d__Bacteria	p__Proteobacteria	c__Gammaproteobacteria	o__Diplorickettsiales	f__Diplorickettsiaceae	g__Aquicella		0.0185261	0	0	0	0	0	0	0	0	0	0	0	0	0	0	0	0	0	0	0	0	0	4.89428e-05	0	0	0	2.37188e-05	0	0.0183527	0.000100714
ASV_873	d__Bacteria	p__Myxococcota	c__Polyangia	o__Polyangiales	f__Polyangiaceae	g__Pajaroellobacter		0.00288861	1.95865e-05	0	0	0	0	0	0.000217467	0	0	0	0	0	0	0	0	0	0.00245744	2.36767e-05	5.6559e-05	0.000133464	0	0	0	0	0	0	0	0	0
ASV_874	d__Bacteria	p__Elusimicrobiota	c__Lineage_IIb	o__Lineage_IIb	f__Lineage_IIb	g__Lineage_IIb	s__uncultured_bacterium	0.00529224	1.95865e-05	0	0	0	0	0	0	0	0	0	0	0	2.49409e-05	0	0	0	0	0	0	0.0052673	0	0	0	0	0	0	0	0	0
ASV_875	d__Bacteria	p__Firmicutes	c__Bacilli	o__Staphylococcales	f__Staphylococcaceae	g__Staphylococcus		0.00322477	1.95865e-05	0	0	0	0	0	0	0	0	0	0	0	0	0	0	0	0	0.00322477	0	0	0	0	0	0	0	0	0	0	0
ASV_877	d__Bacteria	p__Proteobacteria	c__Gammaproteobacteria	o__Enterobacterales	f__Enterobacteriaceae			0.0153136	1.95865e-05	0	0	0	0	0	0	0	0	0	0	0	0	0	0	0	0.000461701	0	0	0	0	0	0	0	0.000112327	0.00336549	0.0113741	0	0
ASV_878	d__Bacteria	p__Cyanobacteria	c__Cyanobacteriia	o__Cyanobacteriales				2.6024e-05	1.95865e-05	0	0	0	0	0	0	0	0	0	0	0	0	0	0	0	0	0	0	0	2.6024e-05	0	0	0	0	0	0	0	0
ASV_879	d__Bacteria	p__Actinobacteriota	c__Thermoleophilia	o__Solirubrobacterales	f__67-14	g__67-14	s__uncultured_bacterium	0.0255898	1.95865e-05	0	0	0	0	0	0	0	0	0	0	0	2.99291e-05	5.06319e-05	9.17514e-05	0.025218	0	0	0	0	0	0	0	0	0	0	0	0	0.000199508
ASV_880	d__Bacteria	p__Actinobacteriota	c__Thermoleophilia	o__Gaiellales	f__uncultured	g__uncultured	s__uncultured_bacterium	0.00418635	0.00111154	0	0	0	0	0	0	0	0	0	0	0	9.98494e-05	0.000115754	0.00374465	0.000226098	0	0	0	0	0	0	0	0	0	0	0	0	0
ASV_881	d__Bacteria	p__Actinobacteriota	c__Actinobacteria	o__Micrococcales	f__Micrococcaceae	g__Rothia		0.00319636	0.00111154	0	0	0	0	0	0	0	0	0	0	0	0	0	0	0	0	0.00319636	0	0	0	0	0	0	0	0	0	0	0
ASV_882	d__Bacteria	p__Proteobacteria	c__Gammaproteobacteria	o__Pseudomonadales	f__Moraxellaceae	g__Acinetobacter		0.00606905	0.00111154	0	0	0	0	0	0	0	0	0	0	0	0	0	0	0	0	0	0	0	0	0.00606905	0	0	0	0	0	0	0
ASV_883	d__Bacteria	p__Firmicutes	c__Bacilli	o__Staphylococcales	f__Staphylococcaceae	g__Staphylococcus		0.00319162	0.00738981	0	0	0	0	0	0	0	0	0	0	0	0	0	0	0	0	0.00319162	0	0	0	0	0	0	0	0	0	0	0
ASV_884	d__Bacteria	p__Patescibacteria	c__Parcubacteria	o__Parcubacteria	f__Parcubacteria	g__Parcubacteria	s__uncultured_bacterium	0.000345403	0.00738981	0	0	0	7.27463e-05	0	0	0	0	0	0	0.000112765	0	6.40314e-05	0	0	0	0	0	0	5.20481e-05	0	4.38122e-05	0	0	0	0	0	0
ASV_885	d__Bacteria	p__Actinobacteriota	c__Actinobacteria	o__Corynebacteriales	f__Corynebacteriaceae	g__Turicella	s__uncultured_bacterium	0.00415335	0.00738981	0	0	0	0	0	0	0.000110644	0	0.000149745	0	0	0	0	0	0.000324769	0	0	0.000406266	0	0.00316192	0	0	0	0	0	0	0	0
ASV_886	d__Bacteria	p__Proteobacteria	c__Gammaproteobacteria	o__Burkholderiales	f__Oxalobacteraceae			0	0.00738981	0	0	0	0	0	0	0	0	0	0	0	0	0	0	0	0	0	0	0	0	0	0	0	0	0	0	0	0
ASV_887	d__Bacteria	p__Proteobacteria	c__Alphaproteobacteria	o__Paracaedibacterales	f__Paracaedibacteraceae	g__uncultured		0.00506716	0.00738981	0	0	0	0	0	0	0	0	0	0	0	0	0	4.35066e-05	0	0	0	0	0	0	0	0	0	0	0	0	0.00500207	2.15815e-05
ASV_889	d__Bacteria	p__Proteobacteria	c__Gammaproteobacteria	o__Burkholderiales	f__Comamonadaceae			0.011882	0.00738981	0	0	0	0	0	0	0	0	0	0	0	0	0	0	0	0	0	0	0	0.0114742	0.000407857	0	0	0	0	0	0	0
ASV_890	d__Bacteria	p__Firmicutes	c__Bacilli	o__Staphylococcales	f__Staphylococcaceae	g__Staphylococcus		0.0130048	0.00738981	0	0	0	0	0	0	0.0119015	0	0	0	0	0	0	0	0	0	0.00110333	0	0	0	0	0	0	0	0	0	0	0
ASV_891	d__Bacteria	p__Bacteroidota	c__Bacteroidia	o__Bacteroidales	f__Paludibacteraceae	g__Paludibacter	s__uncultured_bacterium	0.000516385	0.00738981	0	0	0	0	0	0	0.000109439	0	0	0	6.44371e-05	0	0	0	0	0	0.0001717	0	0	0	0	0.000131437	3.93719e-05	0	0	0	0	0
ASV_892	d__Bacteria	p__Proteobacteria	c__Gammaproteobacteria	o__Pseudomonadales	f__Moraxellaceae	g__Enhydrobacter		0.0108392	0.00738981	0	0	0	0	0	0	0	0	0	0	0	0	0	0	0	0	0	0.0108392	0	0	0	0	0	0	0	0	0	0
ASV_893	d__Bacteria	p__Firmicutes	c__Negativicutes	o__Veillonellales-Selenomonadales	f__Veillonellaceae	g__Veillonella		0.00988728	0.00738981	1.95865e-05	0	0	0	0	0	0.00809545	0	0.000169711	0	0	0	0	0	0	0	0	0	0	0	0	0	0.00162212	0	0	0	0	0
ASV_894	d__Bacteria	p__Cyanobacteria	c__Vampirivibrionia					0.00333131	0.00737022	0	0	0	0.00010853	0	0	9.22033e-05	0	0	0	0	0	0	0	0	0	0.00299274	4.8752e-05	0	8.90853e-05	0	0	0	0	0	0	0	0
ASV_895	d__Bacteria	p__Actinobacteriota	c__Actinobacteria	o__Pseudonocardiales	f__Pseudonocardiaceae	g__Saccharopolyspora		0.0143165	0.00737022	0	0	0	0	0	0.00051895	0.00890383	0.00461401	8.98473e-05	0	0	0	0	0	0	0	4.73534e-05	0	0	0.000142536	0	0	0	0	0	0	0	0
ASV_896	d__Bacteria	p__Actinobacteriota	c__Actinobacteria	o__Frankiales	f__Nakamurellaceae	g__Nakamurella		0.00509473	0.00737022	0	0	0	0	0	0	0	0	0	0	0	0	0	0	0	0	0	0	0	0	0	0	0.00509473	0	0	0	0	0
ASV_897	d__Bacteria	p__Proteobacteria	c__Gammaproteobacteria	o__Burkholderiales	f__Rhodocyclaceae			0.00958955	0.00737022	0	0	0.000120221	0.00931153	0.000157795	0	0	0	0	0	0	0	0	0	0	0	0	0	0	0	0	0	0	0	0	0	0	0
ASV_898	d__Bacteria	p__Firmicutes	c__Bacilli	o__Staphylococcales	f__Staphylococcaceae	g__Staphylococcus	s__uncultured_bacterium	0.00595217	0.00737022	0	0	0	0	0	0	0	0	0	0	0	0	0	0	0	0	0	0	0	0	0.00595217	0	0	0	0	0	0	0
ASV_899	d__Bacteria	p__Proteobacteria	c__Gammaproteobacteria	o__Burkholderiales	f__Comamonadaceae			0.00178489	0.00737022	0.00109195	0	0	0	0	0.000832958	0	0	0	0	0	0.000951937	0	0	0	0	0	0	0	0	0	0	0	0	0	0	0	0
ASV_900	d__Bacteria	p__Firmicutes	c__Clostridia	o__Clostridiales	f__Clostridiaceae	g__Clostridium_sensu_stricto_10		0.00342038	0.00627827	0	0	6.01106e-05	0	0	0	0	0	0	0.000182585	0	1.99527e-05	0	0	0	0.000853805	0	0	0.00207547	0.000121615	8.09207e-05	0	0	2.59215e-05	0	0	0	0
ASV_901	d__Bacteria	p__Proteobacteria	c__Gammaproteobacteria	o__Burkholderiales	f__Comamonadaceae	g__Acidovorax		0.00475512	0.00627827	0	0	0	0	0	0	0	0	0	0	0	0	0	0	0	0	0	0	0	0	0	0	0	0	0	0	0	0.00475512
ASV_902	d__Bacteria	p__Proteobacteria	c__Alphaproteobacteria	o__Rhizobiales	f__Devosiaceae			0	0.00627827	0.00308695	0.00319132	0	0	0	0	0	0	0	0	0	0	0	0	0	0	0	0	0	0	0	0	0	0	0	0	0	0
ASV_903	d__Bacteria	p__Proteobacteria	c__Gammaproteobacteria	o__Pseudomonadales	f__Moraxellaceae	g__Acinetobacter		0	0	0	0	0	0	0	0	0	0	0	0	0	0	0	0	0	0	0	0	0	0	0	0	0	0	0	0	0	0
ASV_905	d__Bacteria	p__Firmicutes	c__Bacilli	o__Staphylococcales	f__Staphylococcaceae	g__Salinicoccus		0.00308744	0	0	0	0	0	0	0	0	0	0	0	0	0	0	0	0	0	0.00308744	0	0	0	0	0	0	0	0	0	0	0
ASV_906	d__Bacteria	p__Firmicutes	c__Bacilli	o__Staphylococcales	f__Staphylococcaceae	g__Staphylococcus		0.00908356	0	0	0	0	0	0	0	0	0	0	0	0	0	0	0	0	0	0	0	0	0	0	0	0	0.00908356	0	0	0	0
ASV_907	d__Archaea	p__Nanoarchaeota	c__Nanoarchaeia	o__Woesearchaeales	f__Woesearchaeales	g__Woesearchaeales	s__uncultured_archaeon	0.0030778	0	0	0	0	0	0	0	0	0	0	0	0	0	0	0	0	0	0.00304009	3.7706e-05	0	0	0	0	0	0	0	0	0	0
ASV_908	d__Archaea	p__Crenarchaeota	c__Nitrososphaeria	o__Nitrosotaleales	f__Nitrosotaleaceae	g__Nitrosotaleaceae	s__uncultured_archaeon	0.00298919	0	0	0	0	0	0	0	0	0	0	0	0	0	2.02528e-05	0	0	2.35532e-05	0.00294538	0	0	0	0	0	0	0	0	0	0	0
ASV_909	d__Archaea	p__Nanoarchaeota	c__Nanoarchaeia	o__Woesearchaeales	f__SCGC_AAA011-D5	g__SCGC_AAA011-D5		0.00512542	0	0	0	0	0	0	0	0	0	0	0	0	0	0	0	0	0	0	0	0	0	4.89428e-05	0	0.00507648	0	0	0	0	0
ASV_910	d__Bacteria	p__Bacteroidota	c__Bacteroidia	o__Flavobacteriales	f__Weeksellaceae			0.00356712	0	0	0	0	0	0	2.70149e-05	0	0	7.27094e-05	0	0	0	0	0	0	0.003427	4.04e-05	0	0	0	0	0	0	0	0	0	0	0
ASV_911	d__Bacteria	p__Methylomirabilota	c__Methylomirabilia	o__Rokubacteriales	f__Rokubacteriales	g__Rokubacteriales	s__uncultured_bacterium	0.00896559	0	0	0	0	0	0	0	0	0	0	0	0	0	0	0	0	0	0	0	0	0	0	0	0	0.008864	6.63754e-05	3.521e-05	0	0
ASV_912	d__Bacteria	p__Bacteroidota	c__Bacteroidia	o__Bacteroidales	f__Dysgonomonadaceae	g__Proteiniphilum	s__uncultured_bacterium	0.00627046	0	0	0	0	0.00288075	0	0	0	0	0	0	0	0	0	3.62555e-05	0	0	6.05999e-05	0	0	0	4.49559e-05	0	0	0	0	0	0.0032479	0
ASV_915	d__Bacteria	p__Patescibacteria	c__Parcubacteria	o__Candidatus_Brennerbacteria	f__Candidatus_Brennerbacteria	g__Candidatus_Brennerbacteria	s__Parcubacteria_group	0.00652219	0	0	0	0	5.81971e-05	0	0	0	0	0	0	0	0	0	0	0	0	0.00646399	0	0	0	0	0	0	0	0	0	0	0
ASV_916	d__Bacteria	p__Patescibacteria	c__ABY1	o__Candidatus_Magasanikbacteria	f__Candidatus_Magasanikbacteria	g__Candidatus_Magasanikbacteria		1.76649e-05	0	0	0	0	0	0	0	0	0	0	0	0	0	0	0	0	1.76649e-05	0	0	0	0	0	0	0	0	0	0	0	0
ASV_918	d__Bacteria	p__Firmicutes	c__Bacilli	o__Staphylococcales	f__Staphylococcaceae	g__Staphylococcus		0	0	0	0	0	0	0	0	0	0	0	0	0	0	0	0	0	0	0	0	0	0	0	0	0	0	0	0	0	0
ASV_919	d__Bacteria	p__Actinobacteriota	c__Thermoleophilia	o__Solirubrobacterales	f__67-14	g__67-14	s__uncultured_bacterium	0.00537836	0	0	0	0	0	0	0	0	0	0	0	0	0	0	0	0	0.00156755	0	8.12533e-05	0	0.00359905	0.000130514	0	0	0	0	0	0	0
ASV_920	d__Bacteria	p__Firmicutes	c__Bacilli	o__Bacillales	f__Bacillaceae	g__Bacillus		0.0050402	0	0	0	0	0	0	0	0	0	0	0	0	0	0	0	0	0	0	0	0.00480346	0	0.00023674	0	0	0	0	0	0	0
ASV_921	d__Bacteria	p__Proteobacteria	c__Alphaproteobacteria	o__Rhodobacterales	f__Rhodobacteraceae	g__Paracoccus		0.000141769	0	0	0	0	0	0	0	0	0	0	0	0	0	0.000141769	0	0	0	0	0	0	0	0	0	0	0	0	0	0	0
ASV_922	d__Bacteria	p__Proteobacteria	c__Alphaproteobacteria	o__Rhizobiales	f__Rhizobiaceae	g__Aureimonas		0.00472825	0	0	0	0	0	0	0	0	0	0	0	0	0	0.000320157	0	0	0	0	0	0.000400391	0.0040077	0	0	0	0	0	0	0	0
ASV_923	d__Bacteria	p__Proteobacteria	c__Gammaproteobacteria	o__Burkholderiales	f__Comamonadaceae			0.00506001	0	0	0	0	0	0	0	0	0	0	0	0	0	0	0	0	0	0	0	0	0	0	0	0	0	0.00506001	0	0	0
ASV_924	d__Bacteria	p__Planctomycetota	c__Phycisphaerae	o__Phycisphaerales	f__Phycisphaeraceae	g__uncultured		0.00423797	0	0	0	0	4.36478e-05	0	0	0	0	0	0	0	0	0.000128063	0	0	0	0	0	0	0.00406626	0	0	0	0	0	0	0	0
ASV_925	d__Bacteria	p__Patescibacteria	c__Parcubacteria	o__Parcubacteria	f__Parcubacteria	g__Parcubacteria	s__uncultured_bacterium	0.000113583	0	0	0	0	0	0	0	0	0	0	0	0	0	0	0	0	0	0	0	0	0	0	0	0	0	0	7.04201e-05	0	4.3163e-05
ASV_926	d__Bacteria	p__Proteobacteria	c__Alphaproteobacteria	o__Acetobacterales	f__Acetobacteraceae	g__Roseomonas		0.00309906	0	0	0	0	0	0	0	0	0	0	0	0	0	0	0	0	0	0.00296906	0.000130005	0	0	0	0	0	0	0	0	0	0
ASV_927	d__Bacteria	p__Proteobacteria	c__Alphaproteobacteria	o__Rhizobiales	f__Xanthobacteraceae	g__Rhodopseudomonas		0.00458104	0	0	0	0	0	0	0	0	0	0	0	0	4.25283e-05	0	0.00439417	0.000144342	0	0	0	0	0	0	0	0	0	0	0	0	0
ASV_928	d__Bacteria	p__Proteobacteria	c__Gammaproteobacteria	o__Burkholderiales	f__Oxalobacteraceae			0.000838239	0	0	0	0	0.000244194	0	0	0.000202847	0	0	0	0	0	5.06319e-05	0	0	0	1.89414e-05	0	0	0	0	0	0	0	0.00012797	0.000193655	0	0
ASV_929	d__Bacteria	p__Acidobacteriota	c__Holophagae	o__Subgroup_7	f__Subgroup_7	g__Subgroup_7	s__uncultured_bacterium	0.000224168	0	0	0	0	0	0	0	0	0.000103563	0	0	0.000120605	0	0	0	0	0	0	0	0	0	0	0	0	0	0	0	0	0
ASV_930	d__Bacteria	p__Actinobacteriota	c__Actinobacteria	o__Micrococcales	f__Promicromonosporaceae	g__Promicromonospora		0.00919513	0	0	0	0	0.00919513	0	0	0	0	0	0	0	0	0	0	0	0	0	0	0	0	0	0	0	0	0	0	0	0
ASV_932	d__Bacteria	p__Proteobacteria	c__Gammaproteobacteria	o__Burkholderiales	f__Methylophilaceae			0.0369285	0	0	0	0.0369285	0	0	0	0	0	0	0	0	0	0	0	0	0	0	0	0	0	0	0	0	0	0	0	0	0
ASV_933	d__Bacteria	p__Verrucomicrobiota	c__Verrucomicrobiae	o__Chthoniobacterales	f__Chthoniobacteraceae	g__Candidatus_Udaeobacter	s__uncultured_bacterium	0.00321022	0	0	0	0	0	0	1.35074e-05	0	0	0	0	0	0.00306528	0	0	9.02136e-05	4.12182e-05	0	0	0	0	0	0	0	0	0	0	0	0
ASV_934	d__Bacteria	p__Firmicutes	c__Clostridia	o__Peptostreptococcales-Tissierellales	f__Peptostreptococcales-Tissierellales	g__Anaerococcus	s__uncultured_bacterium	0.000187983	0	0	0	0	0	0	0	0	0	8.98473e-05	0	0	0	0	0	0	0	0	0	0	0	0	0	9.81354e-05	0	0	0	0	0
ASV_936	d__Bacteria	p__Bacteroidota	c__Bacteroidia	o__Bacteroidales	f__Prevotellaceae	g__Prevotella	s__uncultured_bacterium	0.00972571	0	0	0	0	0	0	0	3.68813e-05	0	0	0	0	0	0	0	0	0	2.36767e-05	0	0	0	0	0	0	0	0	0.00966515	0	0
ASV_937	d__Bacteria	p__Planctomycetota	c__Phycisphaerae	o__Phycisphaerales	f__Phycisphaeraceae	g__SM1A02	s__uncultured_bacterium	0.000530229	0	0	0	0	0	0	0	0	0	0	0	8.05464e-05	0	0.000149407	0	0	0	0.0001313	0	0	0	0	0.000168976	0	0	0	0	0	0
ASV_938	d__Bacteria	p__Proteobacteria	c__Alphaproteobacteria	o__Caulobacterales	f__Caulobacteraceae	g__Brevundimonas		0.000417448	0	0	0	0.0003517	0	6.57479e-05	0	0	0	0	0	0	0	0	0	0	0	0	0	0	0	0	0	0	0	0	0	0	0
ASV_939	d__Bacteria	p__Proteobacteria	c__Gammaproteobacteria	o__Burkholderiales	f__Comamonadaceae			0.00631249	0	0	0	0	0	0	0	0	0	0	0	0	0	0	0	0	0	0.00631249	0	0	0	0	0	0	0	0	0	0	0
ASV_940	d__Bacteria	p__Deinococcota	c__Deinococci	o__Deinococcales	f__Deinococcaceae	g__Deinococcus		0.0165767	0	0	0	6.01106e-05	0.0163881	3.94488e-05	0	0	0	0	0	0	0	0	0	0	0	0	0	0	8.90853e-05	0	0	0	0	0	0	0	0
ASV_941	d__Bacteria	p__Proteobacteria	c__Gammaproteobacteria	o__Pseudomonadales	f__Pseudomonadaceae	g__Pseudomonas		0.000317815	0	0	0	0	0	0.000186029	0	0	0	0.000131786	0	0	0	0	0	0	0	0	0	0	0	0	0	0	0	0	0	0	0
ASV_943	d__Bacteria	p__Bdellovibrionota	c__Bdellovibrionia	o__Bacteriovoracales	f__Bacteriovoracaceae	g__Peredibacter		0.00435972	0	0	0	0	0	0	0	0	0	0	0	0	0	0	0	0	0	0	4.8752e-05	0	0	0	0	0	0	0	0	3.06405e-05	0.00428033
ASV_944	d__Bacteria	p__Proteobacteria	c__Alphaproteobacteria	o__Rhizobiales	f__Rhizobiaceae	g__Allorhizobium-Neorhizobium-Pararhizobium-Rhizobium		0.00371434	0	0	0	0	0	0	0	0	0	0	0	0	0	0	0	0	0.00363309	0	8.12533e-05	0	0	0	0	0	0	0	0	0	0
ASV_945	d__Bacteria	p__Proteobacteria	c__Gammaproteobacteria	o__Xanthomonadales	f__Rhodanobacteraceae	g__uncultured		0.00868983	0	0	0	0	0	0	0	0	0	0	0	0	0	0	0	0	0	0	0	0	0	6.29383e-05	0.000425577	0.00820132	0	0	0	0	0
ASV_946	d__Bacteria	p__Firmicutes	c__Bacilli	o__Erysipelotrichales	f__Erysipelotrichaceae	g__Holdemanella	s__uncultured_bacterium	0.00427387	0	0	0	0	0	0	0	0	0	0	0	4.83279e-05	0	0.000106719	0	0	0	0.000101	0	0.000172772	0.00384505	0	0	0	0	0	0	0	0
ASV_947	d__Bacteria	p__Proteobacteria	c__Gammaproteobacteria	o__Burkholderiales	f__Rhodocyclaceae			0.000334923	0	0	0	0.000120221	0	0	0	0	0	0	0.000101436	0	2.49409e-05	0	0	0	8.83247e-05	0	0	0	0	0	0	0	0	0	0	0	0
ASV_948	d__Bacteria	p__Latescibacterota	c__Latescibacterota	o__Latescibacterota	f__Latescibacterota	g__Latescibacterota	s__uncultured_bacterium	0.00523175	0	0	0	0	0	0	0	0	4.50789e-05	0	0	0	0	0	0	0	0	0	0	0	0	3.26286e-05	0	0	0	0.0046441	0.000363204	0.000146739	0
ASV_949	d__Bacteria	p__Bacteroidota	c__Bacteroidia	o__Cytophagales	f__Microscillaceae	g__uncultured		0.000405196	0	0	0	0	0	0	0	0	0	1.99661e-05	0	0	0	0	0	0	0	0	0.000227509	0	0	0	8.76245e-05	7.00967e-05	0	0	0	0	0
ASV_950	d__Archaea	p__Crenarchaeota	c__Nitrososphaeria	o__Nitrososphaerales	f__Nitrososphaeraceae	g__Nitrososphaeraceae		0.00396644	0	0	0	0	0	3.94488e-05	0	0	0	0	0	0	0	9.11374e-05	0.00337905	0	0	0	0	0	0	0.0004568	0	0	0	0	0	0	0
ASV_951	d__Bacteria	p__Actinobacteriota	c__Actinobacteria	o__Corynebacteriales	f__Corynebacteriaceae	g__Corynebacterium		0.00394367	0.00823956	0	0	0	0	0	0	0	0	0	0	0	0	0.000172148	0.00332634	0.000342812	0	0	0	0	0	0	0	0.000102367	0	0	0	0	0
ASV_952	d__Bacteria	p__Proteobacteria	c__Alphaproteobacteria	o__Sphingomonadales	f__Sphingomonadaceae	g__Sphingomonas		0.00620625	0.00823956	0	0	0	0	0	0	0	0	0	0	0	0	0.00613597	7.02749e-05	0	0	0	0	0	0	0	0	0	0	0	0	0	0
ASV_953	d__Bacteria	p__Actinobacteriota	c__Actinobacteria	o__Micromonosporales	f__Micromonosporaceae			0.00480162	0.00823956	0	0	0	0	0	0	0	0	0	0	0	0	0	0	0	0	0	0	0	0	0	0.000219061	0.00451931	0	6.32501e-05	0	0	0
ASV_954	d__Bacteria	p__Proteobacteria	c__Gammaproteobacteria	o__Xanthomonadales	f__Xanthomonadaceae			0.00464018	0.00823956	0	0	0	0	0	0	0	0	0	0	0	0	0	0	0	0	0	0	0	0	0	0	0	0	0	0	0.0046114	2.87753e-05
ASV_955	d__Archaea	p__Crenarchaeota	c__Bathyarchaeia	o__Bathyarchaeia	f__Bathyarchaeia	g__Bathyarchaeia		0.00357816	0.00823956	0	0	0	0	0	0	0	0	0	0	0	0	0	0.00357816	0	0	0	0	0	0	0	0	0	0	0	0	0	0
ASV_956	d__Eukaryota	p__Basidiomycota	c__Tremellomycetes	o__Trichosporonales	f__Trichosporonaceae			0.00359071	0.00823956	0	0	0	0	0	0	0	0	0	0	0	0	0	0	0	0	0	0	0	0	0	0	0	0.00196139	0	0	0	0.00162931
ASV_957	d__Bacteria	p__Firmicutes	c__Bacilli	o__Lactobacillales	f__Aerococcaceae			0.00103489	0.00823956	0	0	0.000410317	0	0	0	0	0	0	0	0	1.8813e-05	0	0	0	0.000548207	0	0	0	0	0	0	0	0	0	0	0	5.75506e-05
ASV_958	d__Bacteria	p__Planctomycetota	c__Planctomycetes	o__Pirellulales	f__Pirellulaceae	g__Pirellula	s__metagenome	0.00180657	0.00823956	0	0	0	0	0	0	0	0	0	0	0	9.97636e-06	0	0	0	0.000861252	0	0	0.00022244	0	0.000449559	0.000168976	0	2.78637e-05	0	0	0	6.65026e-05
ASV_959	d__Archaea	p__Crenarchaeota	c__Bathyarchaeia	o__Bathyarchaeia	f__Bathyarchaeia	g__Bathyarchaeia	s__uncultured_archaeon	0.00440142	0.00823956	0	0	0	0	0	0	0	0	0	0	0	0	0	0.00440142	0	0	0	0	0	0	0	0	0	0	0	0	0	0
ASV_961	d__Bacteria	p__Actinobacteriota	c__Actinobacteria	o__Corynebacteriales	f__Corynebacteriaceae	g__Corynebacterium	s__uncultured_bacterium	0.0106862	0.00823956	0	0	0	0	0	0	0	0	0	0	0	0	0	0	0	0	0	0	0	0	0	0	0	0	0	0.0106862	0	0
ASV_962	d__Bacteria	p__Proteobacteria	c__Gammaproteobacteria	o__Enterobacterales	f__Enterobacteriaceae	g__Klebsiella		0.00544866	0.00823956	0	0	0	0	0	0	0	0	0	0	0	0	0	0	0	0	0	0	0	0	0.00544866	0	0	0	0	0	0	0
ASV_964	d__Bacteria	p__Patescibacteria	c__Parcubacteria	o__Candidatus_Nomurabacteria	f__Candidatus_Nomurabacteria	g__Candidatus_Nomurabacteria		0.00846157	0.00823956	0	0	0	0	0	0	0	0	0	0	0	0	0	0	0	0	0	0	0	0	0	0	0.00839759	0	6.3985e-05	0	0	0
ASV_965	d__Bacteria	p__Proteobacteria	c__Gammaproteobacteria	o__Burkholderiales	f__Methylophilaceae			0.00392963	0.00823956	0	0	0	0	0	0	0	0	0	0	0	0	0	0	0	0	0	0	0	0.00392963	0	0	0	0	0	0	0	0
ASV_966	d__Bacteria	p__Chloroflexi	c__Chloroflexia	o__Chloroflexales	f__Chloroflexaceae	g__FFCH7168	s__uncultured_bacterium	0.00264888	0.00823956	0	0	0	0	0	0.000173974	0	0	0	0	0	0	0	0	0	0.00220797	0	0	0.000266928	0	0	0	0	0	0	0	0	0
ASV_967	d__Bacteria	p__Actinobacteriota	c__Actinobacteria	o__Micrococcales	f__Microbacteriaceae			0.00518553	0.00823956	0	0	0	0	0	0	0.00495451	0	0.000109813	0	0	0	0	0	0	0	0.0001212	0	0	0	0	0	0	0	0	0	0	0
ASV_968	d__Archaea	p__Halobacterota	c__Methanosarcinia	o__Methanosarciniales	f__Methanosarcinaceae	g__Methanosarcina		0.000231466	0.00823956	0	0	0	0	0	0	0	0	0	0	0	0	0.000192094	0	0	0	0	0	0	0	0	0	3.93719e-05	0	0	0	0	0
ASV_969	d__Bacteria	p__Firmicutes	c__Bacilli	o__Thermicanales	f__Thermicanaceae	g__Thermicanus		0.00869158	0.00823956	0	0	0.000120221	0.00838038	0	0	0	0	0	0	3.22186e-05	0	0.000106719	0	0	0	0	0	0	5.20481e-05	0	0	0	0	0	0	0	0
ASV_970	d__Bacteria	p__Firmicutes	c__Clostridia	o__Lachnospirales	f__Lachnospiraceae			0.00106232	0.00823956	0	0	0.000293083	0	0	0	0	0	0	7.91891e-05	0	5.64389e-05	0	0	0	0	0	0	0.000533855	0	0	0	0	0	0	0	0	9.97539e-05
ASV_971	d__Bacteria	p__Desulfobacterota	c__Thermodesulfobacteria	o__Thermodesulfobacteriales	f__Thermodesulfobacteriaceae	g__Thermodesulfobacterium		0	0.00823956	0.000729186	0.00751037	0	0	0	0	0	0	0	0	0	0	0	0	0	0	0	0	0	0	0	0	0	0	0	0	0	0
ASV_972	d__Bacteria	p__Actinobacteriota	c__Actinobacteria	o__Frankiales	f__Nakamurellaceae	g__Nakamurella		0.00511518	0	0	0	0	0	0	0	0	0	0	0	0	0	0	0	0	0	0	0	0	0	0	0	0	0.00511518	0	0	0	0
ASV_973	d__Archaea	p__Thermoplasmatota	c__Thermoplasmata	o__Marine_Benthic_Group_D_and_DHVEG-1	f__Marine_Benthic_Group_D_and_DHVEG-1	g__Marine_Benthic_Group_D_and_DHVEG-1	s__uncultured_archaeon	0.00358474	0	0	0	0	0	0	0	0	0	0	0	0	0	0	0.00346689	0.000117841	0	0	0	0	0	0	0	0	0	0	0	0	0
ASV_974	d__Archaea	p__Crenarchaeota	c__Bathyarchaeia	o__Bathyarchaeia	f__Bathyarchaeia	g__Bathyarchaeia	s__uncultured_archaeon	0.00348446	0	0	0	0	0	0	0	0	0	0	0	0	0	0	0.00348446	0	0	0	0	0	0	0	0	0	0	0	0	0	0
ASV_975	d__Bacteria	p__Myxococcota	c__bacteriap25	o__bacteriap25	f__bacteriap25	g__bacteriap25	s__uncultured_bacterium	0.00292517	0	0	0	0	0	0	0	0	0	0	0	0	1.8813e-05	0	0	0	0.00206276	5.4606e-05	6.50026e-05	0.000133464	0	0	0.000506928	0	8.35911e-05	0	0	0	0
ASV_976	d__Bacteria	p__Chloroflexi	c__Dehalococcoidia	o__661239	f__661239	g__661239	s__uncultured_bacterium	0.00301568	0	0	0	0	0.000135663	0	0	0	0	0	0	0.000120605	0	0	0	0	0	0.00269441	6.50026e-05	0	0	0	0	0	0	0	0	0	0
ASV_977	d__Bacteria	p__Proteobacteria	c__Gammaproteobacteria	o__Pseudomonadales	f__Pseudomonadaceae	g__Pseudomonas		0.000105197	0	0	0	0	0	0.000105197	0	0	0	0	0	0	0	0	0	0	0	0	0	0	0	0	0	0	0	0	0	0	0
ASV_978	d__Bacteria	p__Proteobacteria	c__Gammaproteobacteria	o__Pseudomonadales	f__Moraxellaceae	g__Moraxella		0.00402194	0.00453765	0	0	0	0	0	0	0.000191518	0	0	0	0.000112765	0	0	0	0	0	8.07999e-05	0	0	0.00363686	0	0	0	0	0	0	0	0
ASV_979	d__Bacteria	p__Bacteroidota	c__Bacteroidia	o__Sphingobacteriales	f__Sphingobacteriaceae	g__Mucilaginibacter		0.000832626	0.00453765	0	0	0	0	0	0	0	0	0	0	0	0	0	0	0	7.06597e-05	5.04999e-05	0.000240521	0	0	0.000163143	0	0.000102367	0	0	0	0.000205435	0
ASV_980	d__Bacteria	p__Bacteroidota	c__Bacteroidia	o__Cytophagales	f__Cytophagaceae	g__Cytophaga	s__uncultured_bacterium	0.0050979	0.00453765	0	0	0	0	0	0	0	0	0	0	0	0	0	0	0	0	0	0	0	0	0	0	0	0.0050979	0	0	0	0
ASV_981	d__Bacteria	p__Actinobacteriota	c__Actinobacteria	o__Propionibacteriales	f__Nocardioidaceae	g__Nocardioides		0.00621721	0.00453765	0	0	0	0	0	0	0	0	0	0	0	0	0	0	0	0	0	0	0	0	0	0	0	0	0.00621721	0	0	0
ASV_982	d__Bacteria	p__Chloroflexi	c__KD4-96	o__KD4-96	f__KD4-96	g__KD4-96	s__uncultured_bacterium	0.000420216	0.00453765	0	0	0	0.000160042	0	0	0	0	0	0	0.000128874	0	0	0	0	0	0.0001313	0	0	0	0	0	0	0	0	0	0	0
ASV_983	d__Bacteria	p__Proteobacteria	c__Alphaproteobacteria	o__Caulobacterales	f__Caulobacteraceae	g__Brevundimonas		0.00828294	0.00453765	0	0	0	0	0	0	0	0	0	0	0	0	0	0	0	0	0	0	0	0	0	0.00814908	0.000133865	0	0	0	0	0
ASV_984	d__Bacteria	p__Proteobacteria	c__Gammaproteobacteria	o__Pseudomonadales	f__Pseudomonadaceae	g__Pseudomonas		0.00628119	0.00453765	0	0	0	0	0	0	0	0	0	0	0	0	0	0	0	0	0	0	0	0	0	0	0	0	0.00628119	0	0	0
ASV_985	d__Bacteria	p__Proteobacteria	c__Gammaproteobacteria	o__Burkholderiales	f__Comamonadaceae			0.00464098	0.00453765	0	0	0	0	0	0	0	0	0	0	0	0	0	0	0	0	0	0	0	0	0	0	0	0	0.00464098	0	0	0
ASV_986	d__Bacteria	p__Actinobacteriota	c__Actinobacteria	o__Propionibacteriales	f__Nocardioidaceae	g__Nocardioides		0.00218148	0.00453765	0	0	0	0	0	0	0	0	0	0	0	0	0	0	0	0.00218148	0	0	0	0	0	0	0	0	0	0	0	0
ASV_987	d__Bacteria	p__Firmicutes	c__Clostridia	o__Clostridia_UCG-014	f__Clostridia_UCG-014	g__Clostridia_UCG-014	s__uncultured_bacterium	0.00351301	0.00453765	0	0	6.01106e-05	0	0	0	0	0	0	6.08618e-05	0	2.49409e-05	0	0	0	0.00322091	4.92413e-05	3.25013e-05	4.71698e-05	0	0	0	0	1.7281e-05	0	0	0	0
ASV_988	d__Bacteria	p__Patescibacteria	c__Berkelbacteria	o__Berkelbacteria	f__Berkelbacteria	g__Berkelbacteria	s__uncultured_bacterium	0.00266293	0.00453765	0	0	0	0	0	8.69868e-05	0	0	0	0.000118784	0	1.50504e-05	0	0	0	0.00207766	0	0	0.000266928	0	0	0	0	9.75229e-05	0	0	0	0
ASV_989	d__Bacteria	p__Proteobacteria	c__Alphaproteobacteria	o__Rhodobacterales	f__Rhodobacteraceae	g__Paracoccus		0.0210876	0.00453765	0	0	0	0	0	0	0	0	0	0	0	4.98818e-05	0.00055961	0.000170119	0.020308	0	0	0	0	0	0	0	0	0	0	0	0	0
ASV_990	d__Bacteria	p__Proteobacteria	c__Gammaproteobacteria	o__Burkholderiales	f__Rhodocyclaceae			0.00900712	0.00453765	0	0	0	0	0	0	0	0	0	0	0	0	0	0	0	0	0	0	0	5.85541e-05	0.00894856	0	0	0	0	0	0	0
ASV_991	d__Bacteria	p__Bdellovibrionota	c__Bdellovibrionia	o__Bdellovibrionales	f__Bdellovibrionaceae	g__Bdellovibrio	s__uncultured_bacterium	0.00277631	0.00453765	0	0	0	0	0	0	0	0	0	0	0	0	0	0	0	0	0.00272756	4.8752e-05	0	0	0	0	0	0	0	0	0	0
ASV_992	d__Bacteria	p__Proteobacteria	c__Gammaproteobacteria	o__Burkholderiales	f__Methylophilaceae			0.00385129	0.00453765	0	0	0	0	0	0	0	0	0	0	0	0.000635879	0	0	0	0	0	0	0.00321541	0	0	0	0	0	0	0	0	0
ASV_993	d__Bacteria	p__Patescibacteria	c__Parcubacteria	o__Candidatus_Vogelbacteria	f__Candidatus_Vogelbacteria	g__Candidatus_Vogelbacteria		0.00431293	0.00453765	0	0	0	0	0	0	0	0	0	0	0	0	0	0	0	0	0	0.000178757	0	0	0	0	0	0	0	0.00010563	0	0.00402855
ASV_994	d__Bacteria	p__Proteobacteria	c__Gammaproteobacteria	o__Pseudomonadales	f__Moraxellaceae	g__Enhydrobacter	s__uncultured_bacterium	0	0.00453765	0	0	0	0	0	0	0	0	0	0	0	0	0	0	0	0	0	0	0	0	0	0	0	0	0	0	0	0
ASV_995	d__Bacteria	p__Proteobacteria	c__Gammaproteobacteria	o__Burkholderiales	f__Methylophilaceae			0.00497693	0.00453765	0	0	0	0	0	0	0	0	0	0	0	0	0	0	0	0	0	0	0	0	0	0	0	0.00497693	0	0	0	0
ASV_997	d__Bacteria	p__Proteobacteria	c__Gammaproteobacteria	o__Burkholderiales	f__Comamonadaceae			0	0.00453765	0.0025797	0.00195795	0	0	0	0	0	0	0	0	0	0	0	0	0	0	0	0	0	0	0	0	0	0	0	0	0	0
ASV_998	d__Bacteria	p__Proteobacteria	c__Alphaproteobacteria	o__Sphingomonadales	f__Sphingomonadaceae	g__Sphingomonas		8.05202e-05	0	0	0	0	0	8.05202e-05	0	0	0	0	0	0	0	0	0	0	0	0	0	0	0	0	0	0	0	0	0	0	0
ASV_999	d__Bacteria	p__Actinobacteriota	c__Actinobacteria	o__Micrococcales	f__Intrasporangiaceae			0.00900369	0	0	0	0	0	0	0	0	0	0	0	0	0	0	0	0	0.000129543	0.0001313	0.00874285	0	0	0	0	0	0	0	0	0	0
ASV_1000	d__Bacteria	p__Proteobacteria	c__Gammaproteobacteria	o__Burkholderiales	f__Comamonadaceae	g__Aquabacterium		0.0021522	0	0	0	0	0	0	0	0	0	0	0	0	0.0021522	0	0	0	0	0	0	0	0	0	0	0	0	0	0	0	0
ASV_1001	d__Bacteria	p__Proteobacteria	c__Alphaproteobacteria	o__Caulobacterales	f__Caulobacteraceae	g__Brevundimonas		0.00796902	0	0	0	0	0	0	0	0	0	0	0	0	0	0	0	0	0	0	0	0	0	0	0	0	0.00796902	0	0	0	0
ASV_1002	d__Bacteria	p__Bacteroidota	c__Bacteroidia	o__Bacteroidales	f__Prevotellaceae	g__Prevotella		0.00568253	0	0	0	0	5.81971e-05	0	0	0	0	0	0	0	0	0	0	0	0	0.00558529	0	0	3.90361e-05	0	0	0	0	0	0	0	0
ASV_1003	d__Bacteria	p__Proteobacteria	c__Gammaproteobacteria	o__Burkholderiales	f__Comamonadaceae	g__Delftia		0	0	0	0	0	0	0	0	0	0	0	0	0	0	0	0	0	0	0	0	0	0	0	0	0	0	0	0	0	0
ASV_1004	d__Bacteria	p__Bacteroidota	c__Bacteroidia	o__Flavobacteriales	f__Flavobacteriaceae	g__Flavobacterium	s__uncultured_bacterium	0	0	0	0	0	0	0	0	0	0	0	0	0	0	0	0	0	0	0	0	0	0	0	0	0	0	0	0	0	0
ASV_1005	d__Bacteria	p__Proteobacteria	c__Alphaproteobacteria	o__Sphingomonadales	f__Sphingomonadaceae	g__Altererythrobacter		0.000311883	0	0	0	0	0	0	3.60198e-05	0	0	0	0	0	3.49172e-05	0	0	0	5.88831e-05	0	0	3.93082e-05	0	0	0.000116833	0	2.59215e-05	0	0	0	0
ASV_1006	d__Bacteria	p__Actinobacteriota	c__Thermoleophilia	o__Solirubrobacterales	f__67-14	g__67-14		0.00440828	0	0	0	0	0	0	0	0	0	0	0	0	0	2.02528e-05	0.00123567	0.000126299	0	0	0	0	0	0.000146829	0	0	0.0027736	0	0.00010563	0	0
ASV_1008	d__Bacteria	p__Patescibacteria	c__Parcubacteria	o__Candidatus_Yanofskybacteria	f__Candidatus_Yanofskybacteria	g__Candidatus_Yanofskybacteria	s__uncultured_bacterium	0.00571848	0	0	0	0	4.36478e-05	0	0	0	0	0	0	0	0	0	0	0	0	0.00563579	0	0	3.90361e-05	0	0	0	0	0	0	0	0
ASV_1009	d__Bacteria	p__Proteobacteria	c__Gammaproteobacteria	o__Burkholderiales	f__Comamonadaceae			0.0121019	0	0	0	0	0	0	0	0	0	0	0	0	0	0.0121019	0	0	0	0	0	0	0	0	0	0	0	0	0	0	0
ASV_1010	d__Bacteria	p__Patescibacteria	c__Microgenomatia	o__Candidatus_Curtissbacteria	f__Candidatus_Curtissbacteria	g__Candidatus_Curtissbacteria	s__uncultured_bacterium	0.00595746	0	0	0	0	0	1.38828e-05	0	0	0.000138083	0	0	0	0	0	3.62555e-05	0	0	0	0	0	0	3.59648e-05	0	0	1.7281e-05	0.00571599	0	0	0
ASV_1011	d__Bacteria	p__Proteobacteria	c__Alphaproteobacteria	o__Rhizobiales	f__Xanthobacteraceae			0.0105964	0	0	0	0	0	0	0	0.00996567	0.000603502	2.7266e-05	0	0	0	0	0	0	0	0	0	0	0	0	0	0	0	0	0	0	0
ASV_1012	d__Bacteria	p__Cyanobacteria	c__Cyanobacteriia	o__Leptolyngbyales	f__Leptolyngbyaceae	g__Phormidesmis_ANT.L52.6	s__uncultured_bacterium	0.00209615	0	0	0	0	0	0	0	0	0	0	0	0	0	0	0	0	0.00204042	0	0	0	0	0	0	0	5.57274e-05	0	0	0	0
ASV_1013	d__Bacteria	p__Proteobacteria	c__Gammaproteobacteria	o__Burkholderiales	f__Neisseriaceae	g__Neisseria	s__uncultured_bacterium	0.00342621	0	0	0	0	0	0	0	0	0	0	0	0	7.8757e-05	0	0.00261774	0.000234555	0.000276399	0	0	0	0	0.000218758	0	0	0	0	0	0	0
ASV_1014	d__Bacteria	p__Proteobacteria	c__Gammaproteobacteria	o__Burkholderiales	f__Comamonadaceae			0.0089106	0	0	0	0	0	0	0	0	0	0	0	0	0	0	0	0	0	0	0	0	8.45782e-05	0.00882602	0	0	0	0	0	0	0
ASV_1015	d__Archaea	p__Crenarchaeota	c__Nitrososphaeria	o__Nitrososphaerales	f__Nitrososphaeraceae	g__Nitrososphaeraceae		0.00329706	0	0	0	0	0	0	0	0	0	0	0	0	0	0	0.00329706	0	0	0	0	0	0	0	0	0	0	0	0	0	0
ASV_1019	d__Bacteria	p__Proteobacteria	c__Gammaproteobacteria	o__Pseudomonadales	f__Moraxellaceae	g__Acinetobacter		0.0078297	0	0	0	0	0	0	0	0	0	0	0	0	0	0	0	0	0	0	0	0	0	0	0	0	0.0078297	0	0	0	0
ASV_1020	d__Bacteria	p__Bdellovibrionota	c__Bdellovibrionia	o__Bdellovibrionales	f__Bdellovibrionaceae	g__Bdellovibrio	s__uncultured_bacterium	0.00939244	0	0	0	0	0.000217061	0	0	0.000165966	0	0	0	0	0	6.07583e-05	0	0	0	7.57655e-05	0	0	0.00887289	0	0	0	0	0	0	0	0
ASV_1023	d__Bacteria	p__Chloroflexi	c__Dehalococcoidia	o__GIF9	f__AB-539-J10	g__AB-539-J10	s__uncultured_bacterium	0.00340898	0.00546287	0	0	0	0	0	0	0	0	0	0	0	2.99291e-05	5.06319e-05	0.00314343	0.000126299	0	0	0	0	0	0	0	0	0	0	0	5.86958e-05	0
ASV_1024	d__Bacteria	p__Actinobacteriota	c__Actinobacteria	o__Frankiales	f__Geodermatophilaceae	g__Geodermatophilus		0.000130005	0.00546287	0	0	0	0	0	0	0	0	0	0	0	0	0	0	0	0	0	0.000130005	0	0	0	0	0	0	0	0	0	0
ASV_1025	d__Bacteria	p__Proteobacteria	c__Gammaproteobacteria	o__Burkholderiales	f__Rhodocyclaceae			0.0141887	0.00546287	0	0	0	0	0	0	0	0.00012021	0	0	0	0	0	0	0	0.000194314	0	0	0	0	0	0	0	0	0	0	0.0134886	0.000385588
ASV_1026	d__Bacteria	p__Firmicutes	c__Bacilli	o__Lactobacillales	f__Lactobacillaceae	g__Lactobacillus		0.0103135	0.00546287	0	0	0	0.00010853	0	0	0	0	0	0	0	0	0	0	0	0	2.36767e-05	0	0.000965693	0.00910141	0.0001142	0	0	0	0	0	0	0
ASV_1027	d__Bacteria	p__Patescibacteria	c__Parcubacteria					0.00031213	0.00546287	0	0	0	0	0	0	0	0	0.000149745	0	0	0	0	0	0.000162385	0	0	0	0	0	0	0	0	0	0	0	0	0
ASV_1028	d__Bacteria	p__Proteobacteria	c__Gammaproteobacteria	o__Enterobacterales	f__Enterobacteriaceae			0.00498112	0.00546287	0	0	0	0	0	0	0	0	0	0	0	0	0	0	0	0	0	0	0	0	0.00498112	0	0	0	0	0	0	0
ASV_1029	d__Bacteria	p__Bacteroidota	c__Rhodothermia	o__Rhodothermales	f__Rhodothermaceae	g__Salinibacter	s__uncultured_bacterium	0.000116819	0.00546287	0	0	0	0	0	0	0	0	0	0	0	0	0	0	0	0	0	0	0	0	0	0	0	0	0	0	8.80437e-05	2.87753e-05
ASV_1030	d__Bacteria	p__Proteobacteria	c__Gammaproteobacteria	o__Burkholderiales	f__Rhodocyclaceae	g__Dechloromonas		0.000733904	0.00546287	0	0	0	0	0	0.000733904	0	0	0	0	0	0	0	0	0	0	0	0	0	0	0	0	0	0	0	0	0	0
ASV_1031	d__Bacteria	p__Firmicutes	c__Bacilli	o__Staphylococcales	f__Staphylococcaceae	g__Staphylococcus		0.00557519	0.00546287	0	0	0	0	0	0	0	0	0	0	0	0	0	0	0	0	0.00557519	0	0	0	0	0	0	0	0	0	0	0
ASV_1032	d__Bacteria	p__Acidobacteriota	c__Vicinamibacteria	o__Vicinamibacterales				0.000159142	0.00546287	0	0	0	0	0	0	0	0	1.3633e-05	0	0	0	0	0	0	0	0	7.54119e-05	0	0	0	0	7.00967e-05	0	0	0	0	0
ASV_1033	d__Bacteria	p__Firmicutes	c__Bacilli	o__Lactobacillales	f__Lactobacillaceae	g__Lactobacillus		0.00990166	0.00546287	0	0	0	0	0	0	0	0	0	0	0.000301514	0	0	0	0	0	0	0	2.35849e-05	0.00947867	9.78857e-05	0	0	0	0	0	0	0
ASV_1034	d__Bacteria	p__Bacteroidota	c__Bacteroidia	o__Bacteroidales	f__Prolixibacteraceae	g__WCHB1-32	s__uncultured_bacterium	0.00336133	0.00546287	0	0	0	0	0	0	0	0	0	0	0	4.98818e-05	6.07583e-05	0.0029984	0.00020486	0	0	0	0	0	0	0	0	0	4.74376e-05	0	0	0
ASV_1035	d__Bacteria	p__Actinobacteriota	c__Actinobacteria	o__Pseudonocardiales	f__Pseudonocardiaceae	g__Pseudonocardia	s__uncultured_bacterium	0.00375154	0.00546287	0	0	0	0	0	0	0.000218878	0	0	0	0	0	0	0	0	0	0.0001111	0	0	0.00342157	0	0	0	0	0	0	0	0
ASV_1036	d__Bacteria	p__Proteobacteria	c__Alphaproteobacteria	o__Sphingomonadales	f__Sphingomonadaceae	g__Sphingomonas		0.0203227	0.00546287	0	0	0	0	0	0	0	0	0	0	0	2.99291e-05	0	0.000190754	0.020102	0	0	0	0	0	0	0	0	0	0	0	0	0
ASV_1037	d__Bacteria	p__Patescibacteria	c__Parcubacteria	o__Candidatus_Vogelbacteria	f__Candidatus_Vogelbacteria	g__Candidatus_Vogelbacteria		0.00260942	0.00546287	0	0	0	0	0	0	0	0	0	0	0	0	5.06319e-05	0	0	1.11702e-05	0.00254761	0	0	0	0	0	0	0	0	0	0	0
ASV_1038	d__Bacteria	p__Proteobacteria	c__Alphaproteobacteria	o__Sphingomonadales	f__Sphingomonadaceae	g__Sphingopyxis		0.00332026	0.00546287	0	0	0	0	0	0	0	0	0	0	0	0	0	0	0	0.0031208	0.000124047	7.54119e-05	0	0	0	0	0	0	0	0	0	0
ASV_1039	d__Bacteria	p__Acidobacteriota	c__Blastocatellia	o__Blastocatellales	f__Blastocatellaceae	g__Blastocatella		0.00216786	0.00546287	0	0	0.000117233	0	0	0	0	0	0	0	0	1.12878e-05	0	0	0	0.00196968	0	0	0	0	0	0	0	6.96592e-05	0	0	0	0
ASV_1040	d__Bacteria	p__Proteobacteria	c__Alphaproteobacteria	o__Rickettsiales	f__Rickettsiaceae			0.000680532	0.00546287	0	0	0	0	0	0	0	0	0	0	0.000177202	0	0	0	0	0	8.07999e-05	0	0	8.45782e-05	0	0.000337952	0	0	0	0	0	0
ASV_1042	d__Bacteria	p__Firmicutes	c__Clostridia	o__Clostridia	f__Hungateiclostridiaceae	g__Ruminiclostridium	s__uncultured_bacterium	0	0.00546287	0.00265604	0.00280683	0	0	0	0	0	0	0	0	0	0	0	0	0	0	0	0	0	0	0	0	0	0	0	0	0	0
ASV_1043	d__Bacteria	p__Proteobacteria	c__Alphaproteobacteria	o__Sphingomonadales	f__Sphingomonadaceae	g__Sphingomonas		0.00421426	0	0	0	0	0	0	0	0	0	0	0	0	0	0	0	0	0.00264974	0	0.000422517	0	0	0.001142	0	0	0	0	0	0	0
ASV_1044	d__Bacteria	p__Actinobacteriota	c__Actinobacteria	o__Corynebacteriales	f__Corynebacteriaceae	g__Corynebacterium	s__uncultured_bacterium	0	0	0	0	0	0	0	0	0	0	0	0	0	0	0	0	0	0	0	0	0	0	0	0	0	0	0	0	0	0
ASV_1045	d__Bacteria	p__Bacteroidota	c__Bacteroidia	o__Sphingobacteriales				0.000191362	0	0	0	8.01475e-05	0	0	0	0	0	0	0	0	1.49645e-05	0	0	0	4.12182e-05	0	0	5.50314e-05	0	0	0	0	0	0	0	0	0
ASV_1046	d__Bacteria	p__Patescibacteria	c__Gracilibacteria	o__Candidatus_Peribacteria	f__Candidatus_Peribacteria	g__Candidatus_Peribacteria	s__uncultured_bacterium	0.00400969	0	0	0	0	0	0	0	0	0	0	0	0	0	0	0	0.000108256	0	0	0.000146256	0	0	0	0	0	0	0	0	0	0.00375518
ASV_1047	d__Bacteria	p__Actinobacteriota	c__Actinobacteria	o__Propionibacteriales	f__Nocardioidaceae	g__Nocardioides		3.78827e-05	0	0	0	0	0	0	0	0	0	0	0	0	0	0	0	0	0	3.78827e-05	0	0	0	0	0	0	0	0	0	0	0
ASV_1048	d__Bacteria	p__Proteobacteria	c__Gammaproteobacteria	o__Burkholderiales	f__Comamonadaceae			0.00470043	0	0	0	0	0	0	0	0	0	0	0	0	0	0	0	0	0	0	0	0	0	0	0	0	0.00470043	0	0	0	0
ASV_1049	d__Bacteria	p__Proteobacteria	c__Alphaproteobacteria	o__Rhodobacterales	f__Rhodobacteraceae	g__Paracoccus		0.000143747	0	0	0	0	0	0	0	0	0	0	0	0	0	0	7.97622e-05	0	0	0	0	0	0	0	0	0	0	6.3985e-05	0	0	0
ASV_1050	d__Bacteria	p__Bacteroidota	c__Bacteroidia	o__Sphingobacteriales	f__NS11-12_marine_group	g__NS11-12_marine_group	s__uncultured_bacterium	0.000240709	0	0	0	0	0	0	2.25124e-05	0	0	0	0	0	3.49172e-05	0	0	0	0	0	0	0	0	0	0.000131437	0	5.1843e-05	0	0	0	0
ASV_1051	d__Bacteria	p__Patescibacteria	c__ABY1	o__Candidatus_Magasanikbacteria	f__Candidatus_Magasanikbacteria	g__Candidatus_Magasanikbacteria		0.00462583	0	0	0	0	0	0	0	0	0	0	0	0	0	0	0	0	2.35532e-05	0	0	3.14465e-05	0	0	0	0	0.00457083	0	0	0	0
ASV_1052	d__Bacteria	p__Patescibacteria	c__Gracilibacteria	o__JGI_0000069-P22	f__JGI_0000069-P22	g__JGI_0000069-P22		0.016769	0	0	0	0	0	0	0	0	0	2.27217e-05	0	0	0	0	0	0.000196402	0	0	0.000150824	0	0	0	0	0	0	0	0.000366905	3.83007e-05	0.0159939
ASV_1053	d__Archaea	p__Crenarchaeota	c__Nitrososphaeria	o__Nitrososphaerales	f__Nitrososphaeraceae	g__Nitrososphaeraceae		0.00339096	0	0	0	0	0	0	0	0	0.000240421	0	0	0	0	0	0.00299254	0	1.11702e-05	0	0	0	0	0.000146829	0	0	0	0	0	0	0
ASV_1054	d__Bacteria	p__Patescibacteria	c__ABY1	o__Candidatus_Magasanikbacteria	f__Candidatus_Magasanikbacteria	g__Candidatus_Magasanikbacteria	s__uncultured_bacterium	0.00432851	0	0	0	0	0	0	0	0	0	0	0	0	0	0	0	0	0	0	0	0	0	3.26286e-05	0	0.00401594	0	1.58125e-05	0	0.000264131	0
ASV_1055	d__Bacteria	p__Actinobacteriota	c__Actinobacteria	o__Frankiales	f__Acidothermaceae	g__Acidothermus		0.000562409	0	0	0	0	0	0	0	0	0.000138083	0	0	0	0	0	5.80088e-05	0	4.80585e-05	5.39767e-05	0.00013521	0	0	4.49559e-05	0	8.41161e-05	0	0	0	0	0
ASV_1056	d__Bacteria	p__Acidobacteriota	c__Vicinamibacteria	o__Vicinamibacterales	f__uncultured	g__uncultured	s__uncultured_bacterium	0.00572666	0	0	0	0	0	0	0	0	0	0	0	0	0	0	0	0	0	0	0	0	0	0	0	0	0	0.00572666	0	0	0
ASV_1057	d__Bacteria	p__Chloroflexi	c__AD3	o__AD3	f__AD3	g__AD3	s__uncultured_bacterium	0.000162796	0	0	0	0	0.000162796	0	0	0	0	0	0	0	0	0	0	0	0	0	0	0	0	0	0	0	0	0	0	0	0
ASV_1058	d__Bacteria	p__Cyanobacteria	c__Cyanobacteriia	o__Leptolyngbyales	f__Leptolyngbyaceae			0.00245707	0	0	0	0	0	0	0.00013048	0	0	0	0	0	0	0	0	0	0.00193989	0	4.8752e-05	0	0	0	0.000337952	0	0	0	0	0	0
ASV_1059	d__Bacteria	p__Actinobacteriota	c__Actinobacteria	o__Actinomycetales	f__Actinomycetaceae	g__Actinomyces		0.00745354	0	0	0	0	0	0	0	0	0	0	0	0	0	0	0	0	0	0	0	0	0	0	0	0	0.00745354	0	0	0	0
ASV_1060	d__Bacteria	p__Patescibacteria	c__Gracilibacteria	o__Gracilibacteria	f__Gracilibacteria	g__Gracilibacteria	s__uncultured_bacterium	0.0171222	0.00582498	0	0	0	0	0	0	0	0	0	0	0	0	0	0	0.000196402	0	0	0.000169677	0	0	0	0	0	0	0	0	0.000149325	0.0166068
ASV_1061	d__Bacteria	p__Patescibacteria	c__Parcubacteria	o__Candidatus_Azambacteria	f__Candidatus_Azambacteria	g__Candidatus_Azambacteria		0.000313348	0.00582498	0	0	0.00017585	0	0	0	0	0	0	0	0	1.12878e-05	0	0	0	3.7234e-05	0	0	8.89759e-05	0	0	0	0	0	0	0	0	0
ASV_1062	d__Bacteria	p__Patescibacteria	c__Saccharimonadia	o__Saccharimonadales	f__Saccharimonadales	g__Saccharimonadales	s__uncultured_bacterium	0.00314242	0.00582498	0	0	0	0	0	0	0	0	0	4.05745e-05	0	3.49172e-05	0	0	0	0.00296182	0	3.7706e-05	2.35849e-05	0	0	4.38122e-05	0	0	0	0	0	0
ASV_1063	d__Bacteria	p__Proteobacteria	c__Alphaproteobacteria	o__Caulobacterales	f__Caulobacteraceae	g__Caulobacter		0.00185527	0.00582498	0	0	0	0	0	0.00049077	0	0	0	0	0	0	0	0.0013645	0	0	0	0	0	0	0	0	0	0	0	0	0	0
ASV_1064	d__Bacteria	p__Proteobacteria	c__Gammaproteobacteria	o__Burkholderiales	f__Oxalobacteraceae	g__Massilia		0	0.00582498	0	0	0	0	0	0	0	0	0	0	0	0	0	0	0	0	0	0	0	0	0	0	0	0	0	0	0	0
ASV_1065	d__Bacteria	p__Actinobacteriota	c__Actinobacteria	o__Micrococcales	f__Microbacteriaceae	g__Curtobacterium		0.00036004	0.00582498	0	0	0	0.000162796	0.000197244	0	0	0	0	0	0	0	0	0	0	0	0	0	0	0	0	0	0	0	0	0	0	0
ASV_1066	d__Bacteria	p__Actinobacteriota	c__Actinobacteria	o__Pseudonocardiales	f__Pseudonocardiaceae			0.00560935	0.00582498	0	0	0	0	0	0	0	0	0	0	0	0	0	0	0	0	0	0	0	0	0	0	0	0	0.00560935	0	0	0
ASV_1067	d__Bacteria	p__Actinobacteriota	c__Actinobacteria	o__Corynebacteriales	f__Corynebacteriaceae	g__Lawsonella	s__uncultured_bacterium	0.00472037	0.00582498	0	0	0	0	0	0	0	0	0	0	0	0	0	0	0	0	0	0	0	0	0.00472037	0	0	0	0	0	0	0
ASV_1068	d__Bacteria	p__Fibrobacterota	c__Fibrobacteria	o__Fibrobacterales	f__Fibrobacteraceae	g__uncultured	s__metagenome	0.00637964	0.00582498	0	0	0	0	0	0	0	0	0	0	0	0	0	0	0	0	0.000435651	0	0	0	0	0	0	0.00580958	6.3985e-05	7.04201e-05	0	0
ASV_1069	d__Bacteria	p__Proteobacteria	c__Gammaproteobacteria	o__Pseudomonadales	f__Moraxellaceae	g__Acinetobacter		0	0.00582498	0	0	0	0	0	0	0	0	0	0	0	0	0	0	0	0	0	0	0	0	0	0	0	0	0	0	0	0
ASV_1070	d__Bacteria	p__Proteobacteria	c__Alphaproteobacteria	o__Acetobacterales	f__Acetobacteraceae	g__Roseomonas		0.000123801	0.00582498	0	0	0	0	0	0	0	0.000105184	0	0	0	0	0	0	0	1.8617e-05	0	0	0	0	0	0	0	0	0	0	0	0
ASV_1071	d__Bacteria	p__Actinobacteriota	c__Actinobacteria	o__Micrococcales	f__Microbacteriaceae			0.00444	0.00584947	0	0	0	0	0	0	0	0	0	0	0	1.99527e-05	0	0	0	0	0	0	3.93082e-05	0	0	0	0	0.00438074	0	0	0	0
ASV_1072	d__Bacteria	p__Proteobacteria	c__Gammaproteobacteria	o__Burkholderiales	f__Comamonadaceae			0.00526209	0.00584947	0	0	0	0	0	0	0	0	0	0	0	0	0	0	0	0	0.00526209	0	0	0	0	0	0	0	0	0	0	0
ASV_1073	d__Bacteria	p__Bacteroidota	c__Bacteroidia	o__Flavobacteriales	f__Flavobacteriaceae	g__Flavobacterium		0.00259385	0.00584947	0	0	0	0	0	0	0	0	0	0	0	0.00259385	0	0	0	0	0	0	0	0	0	0	0	0	0	0	0	0
ASV_1074	d__Bacteria	p__Bacteroidota	c__Bacteroidia	o__Bacteroidales	f__Porphyromonadaceae	g__Porphyromonas	s__uncultured_bacterium	0.013236	0.00584947	0	0	0	0	0	0	0	0	0	0	0	0	0	0	0	0	0	0.00846626	0	0	0	0	0	0	0	0.00476977	0	0
ASV_1075	d__Bacteria	p__Proteobacteria	c__Alphaproteobacteria	o__Rhizobiales	f__Rhizobiaceae	g__Allorhizobium-Neorhizobium-Pararhizobium-Rhizobium		0.00551025	0.00584947	0	0	0	0.000244194	0	0	0	0	7.27094e-05	0	0.00491467	0	8.1011e-05	0	0	0	0	0	0	0	0	0	0	0	0	0	0.000176087	2.15815e-05
ASV_1076	d__Bacteria	p__Abditibacteriota	c__Abditibacteria	o__Abditibacteriales	f__Abditibacteriaceae	g__Abditibacterium	s__uncultured_bacterium	0.00309429	0.00584947	0	0	0	0	9.20471e-05	0	0	0	0	0	0	9.97636e-06	0	0.00299226	0	0	0	0	0	0	0	0	0	0	0	0	0	0
ASV_1077	d__Bacteria	p__Bacteroidota	c__Bacteroidia	o__Flavobacteriales	f__Weeksellaceae	g__Cloacibacterium		0.00894032	0.00584947	0	0	0	0	0	0.000217467	0.00818765	0.000435366	9.98303e-05	0	0	0	0	0	0	0	0	0	0	0	0	0	0	0	0	0	0	0
ASV_1078	d__Bacteria	p__Proteobacteria	c__Gammaproteobacteria	o__Oceanospirillales	f__Halomonadaceae	g__Halomonas		0	0.00584947	0.00378139	0.00204359	0	0	0	0	0	0	0	0	0	0	0	0	0	0	0	0	0	0	0	0	0	0	0	0	0	0
ASV_1079	d__Bacteria	p__Acidobacteriota	c__Aminicenantia	o__Aminicenantales	f__Aminicenantales	g__Aminicenantales		0.00401323	2.44832e-05	0	0	0	0	0	0	0	0	0	0	0	0	0	0	0	0	0	0	0.00399371	1.9518e-05	0	0	0	0	0	0	0	0
ASV_1080	d__Bacteria	p__Chloroflexi	c__KD4-96	o__KD4-96	f__KD4-96	g__KD4-96		0.006569	0.00269745	0	0	4.00737e-05	7.27463e-05	0.00614086	0	0	6.01052e-05	0	0	0	0	0	5.27062e-05	0	0	0	0	0	0	0.000163143	0	3.93719e-05	0	0	0	0	0
ASV_1081	d__Bacteria	p__Methylomirabilota	c__Methylomirabilia	o__Rokubacteriales	f__Rokubacteriales	g__Rokubacteriales	s__uncultured_bacterium	0.00256202	0.00269745	0	0	0	5.42652e-05	0	0	0	0	0	0	0	0	0	0	0	0	0.00240555	4.8752e-05	0	5.34512e-05	0	0	0	0	0	0	0	0
ASV_1082	d__Bacteria	p__Patescibacteria	c__Gracilibacteria	o__Gracilibacteria	f__Gracilibacteria	g__Gracilibacteria	s__uncultured_bacterium	0.00709379	0.00269745	0	0	0	0	0	0	0	0	0	0	0	0	0	0	0	0	0	0	0	0	0	0	0.00709379	0	0	0	0	0
ASV_1084	d__Bacteria	p__Proteobacteria	c__Gammaproteobacteria	o__Burkholderiales	f__Comamonadaceae	g__Aquabacterium		0.00373432	0.00269745	0	0	0	0	0	0	0	0	0	0	0	0	0	0.00373432	0	0	0	0	0	0	0	0	0	0	0	0	0	0
ASV_1085	d__Bacteria	p__Bacteroidota	c__Bacteroidia	o__Cytophagales	f__Spirosomaceae	g__Spirosoma		0.00224061	0.00269745	0	0	0	0	0	0	0	0	0	0	0	0	0	0	0	0.00190266	0	0	0	0	0	0.000337952	0	0	0	0	0	0
ASV_1086	d__Bacteria	p__Firmicutes	c__Bacilli	o__Staphylococcales	f__Staphylococcaceae	g__Staphylococcus		0.0024387	0.00269745	0	0	0	0	0	0	0	0	0	0	0	0	0	0	0	0	0.0024387	0	0	0	0	0	0	0	0	0	0	0
ASV_1088	d__Bacteria	p__Bacteroidota	c__Bacteroidia	o__Bacteroidales	f__Prolixibacteraceae	g__WCHB1-32	s__uncultured_bacterium	0.00292498	0.00502035	0	0	6.01106e-05	0	0	0	0	0	0	0	0	1.49645e-05	0	0	0	0.00264385	8.42766e-05	4.8752e-05	0	0	0	7.30204e-05	0	0	0	0	0	0
ASV_1089	d__Bacteria	p__Firmicutes	c__Bacilli	o__Staphylococcales	f__Staphylococcaceae	g__Staphylococcus		0	0.00502035	0	0	0	0	0	0	0	0	0	0	0	0	0	0	0	0	0	0	0	0	0	0	0	0	0	0	0	0
ASV_1090	d__Bacteria	p__Bdellovibrionota	c__Oligoflexia	o__Oligoflexales	f__uncultured	g__uncultured	s__uncultured_bacterium	0.00519677	0.010022	0	0	0	7.27463e-05	0	0	0	0	0	0	0	0	0.00017075	0	0	2.51117e-05	0.00492817	0	0	0	0	0	0	0	0	0	0	0
ASV_1091	d__Bacteria	p__Proteobacteria	c__Gammaproteobacteria	o__Burkholderiales	f__Alcaligenaceae			0.00041015	0.010022	2.44832e-05	0	0	0	0	0	0	0	0	0.000319696	9.04541e-05	0	0	0	0	0	0	0	0	0	0	0	0	0	0	0	0	0
ASV_1092	d__Bacteria	p__Proteobacteria	c__Alphaproteobacteria	o__Rhodobacterales	f__Rhodobacteraceae	g__Paracoccus		0.000947828	0.00999749	0	0	0	0	0	0	0	0	0	0.00044632	0.000257749	0	0	0	0	0	0	0.00024376	0	0	0	0	0	0	0	0	0	0
ASV_1093	d__Bacteria	p__Proteobacteria	c__Gammaproteobacteria	o__Burkholderiales	f__Comamonadaceae			0.00301481	0.00999749	0	0	0	0	0	0	0	0	0	0	0	0	0	0	0	0.00301481	0	0	0	0	0	0	0	0	0	0	0	0
ASV_1094	d__Bacteria	p__Bacteroidota	c__Bacteroidia	o__Cytophagales	f__Hymenobacteraceae	g__Hymenobacter	s__uncultured_bacterium	0.00414985	0.00999749	0	0	0	0	0	0	0	0	0	0	0	0	0	0	0	0	0	0	0	0	0.0002284	0	0.00392145	0	0	0	0	0
ASV_1095	d__Bacteria	p__Bacteroidota	c__Bacteroidia	o__Cytophagales	f__Cytophagaceae	g__Cytophaga	s__uncultured_bacterium	0	0.00999749	0	0	0	0	0	0	0	0	0	0	0	0	0	0	0	0	0	0	0	0	0	0	0	0	0	0	0	0
ASV_1096	d__Bacteria	p__Bdellovibrionota	c__Bdellovibrionia	o__Bdellovibrionales	f__Bdellovibrionaceae	g__Bdellovibrio		0.00808999	0.00999749	0	0	0	0	0	0	0	0	0	0	0	0	0	0	0	0	0	0	2.35849e-05	0	0.00778191	0	0	0	7.90626e-05	0	0.000205435	0
ASV_1097	d__Bacteria	p__Verrucomicrobiota	c__Omnitrophia	o__Omnitrophales	f__Omnitrophales	g__Omnitrophales	s__uncultured_bacterium	0.00308276	0.00999749	0	0	0	0	0	0	0	0	0	0	0	2.49409e-05	0	0	0	0.00290294	2.02e-05	0.000118959	1.57233e-05	0	0	0	0	0	0	0	0	0
ASV_1099	d__Bacteria	p__Chloroflexi	c__Dehalococcoidia	o__GIF9	f__AB-539-J10	g__AB-539-J10	s__uncultured_bacterium	0	0.00999749	0	0	0	0	0	0	0	0	0	0	0	0	0	0	0	0	0	0	0	0	0	0	0	0	0	0	0	0
ASV_1100	d__Bacteria	p__Firmicutes	c__Bacilli	o__Bacillales	f__Bacillaceae	g__Bacillus		0.0108213	0.00999749	0	0	0	0	0	0	0	0	0	0	0	0	0.0108213	0	0	0	0	0	0	0	0	0	0	0	0	0	0	0
ASV_1101	d__Bacteria	p__Proteobacteria	c__Gammaproteobacteria	o__Burkholderiales	f__Oxalobacteraceae			0	0.00999749	0.00256595	0.000107014	0	0	0	0	0	0	0	0	0	0	0	0	0	0	0	0	0	0	0	0	0	0	0	0	0	0
ASV_1102	d__Bacteria	p__Actinobacteriota	c__Actinobacteria	o__Micrococcales	f__Microbacteriaceae	Ambiguous_taxa	Ambiguous_taxa	0.00228948	0.00732452	0	0	0	0	0	0	0	0	0.00010452	0	0	0	0	0	0	0.00159569	4.26181e-05	0.000146256	0.000400391	0	0	0	0	0	0	0	0	0
ASV_1103	d__Bacteria	p__Desulfobacterota	c__Desulfobulbia	o__Desulfobulbales	f__Desulfobulbaceae	Ambiguous_taxa	s__uncultured_delta	1.81774e-05	0.00732452	0	0	0	0	0	0	0	0	1.81774e-05	0	0	0	0	0	0	0	0	0	0	0	0	0	0	0	0	0	0	0
ASV_1104	d__Bacteria	p__Patescibacteria	c__Parcubacteria	o__Parcubacteria	f__Parcubacteria	g__Parcubacteria	s__uncultured_bacterium	0.00264481	0.00732452	0	0	0	0	0	0	0	0	0	0	0	0	0	0	0.000196402	0	0	3.7706e-05	0	0	0	0	0	0.0024107	0	0	0	0
ASV_1105	d__Bacteria	p__Actinobacteriota	c__Actinobacteria	o__Micrococcales	f__Micrococcaceae	g__Rothia	s__uncultured_bacterium	0.0100695	0.00732452	0	0	0	0	0	0	0	0	2.7266e-05	0.0100422	0	0	0	0	0	0	0	0	0	0	0	0	0	0	0	0	0	0
ASV_1106	d__Bacteria	p__Proteobacteria	c__Gammaproteobacteria	o__Burkholderiales	f__Oxalobacteraceae	g__Undibacterium	s__uncultured_bacterium	0.00249908	0.00732452	0	0	0	0	0	0	0	0	0	0	0	0.00249908	0	0	0	0	0	0	0	0	0	0	0	0	0	0	0	0
ASV_1107	d__Bacteria	p__Proteobacteria	c__Gammaproteobacteria	o__Pseudomonadales	f__Pseudomonadaceae	g__Pseudomonas		0.000111269	0.00732452	0.0023229	0	0	0	0	0	0	0	0	0	0	0	0	0.000111269	0	0	0	0	0	0	0	0	0	0	0	0	0	0
ASV_1108	d__Bacteria	p__Proteobacteria	c__Gammaproteobacteria	o__Burkholderiales	f__Methylophilaceae	g__uncultured		0	0.00500162	0	0	0	0	0	0	0	0	0	0	0	0	0	0	0	0	0	0	0	0	0	0	0	0	0	0	0	0
ASV_1109	d__Bacteria	p__Desulfobacterota	c__Desulfomonilia	o__Desulfomonilales	f__Desulfomonilaceae	g__Desulfomonile	s__uncultured_bacterium	0	0.00500162	0.00252077	0.00248086	0	0	0	0	0	0	0	0	0	0	0	0	0	0	0	0	0	0	0	0	0	0	0	0	0	0
ASV_1110	d__Bacteria	p__Firmicutes	c__Bacilli	o__Staphylococcales	f__Staphylococcaceae	g__Staphylococcus		0.00812451	0	0	0	0	0	0	0	0	0	0	0	0	0	0	0	0	0	0	0	0	0	0.00812451	0	0	0	0	0	0	0
ASV_1111	d__Bacteria	p__Proteobacteria	c__Alphaproteobacteria	o__Rhizobiales	f__Beijerinckiaceae	g__1174-901-12		0.000930787	0	0	0	0.000160295	0	0	0	0	0	0	0	0	0	0	0	0	0	0	0.000131971	0.000311416	6.50601e-05	0.000262046	0	0	0	0	0	0	0
ASV_1112	d__Bacteria	p__Bacteroidota	c__Bacteroidia	o__Flavobacteriales	f__Flavobacteriaceae	g__Flavobacterium	s__uncultured_bacterium	0.000232748	0	0	0	0	0	2.4989e-05	0	0	0	5.98982e-05	0	0	0	0	0	0	0	0	9.75039e-05	0	0	0	0	0	0	0	0	0	5.03568e-05
ASV_1113	d__Bacteria	p__Cyanobacteria	c__Cyanobacteriia	o__Cyanobacteriales	f__Phormidiaceae	g__Tychonema_CCAP_1459-11B		0.0036038	0	0	0	0	0	0	0	0	0	0	0	0	0	0	0.0036038	0	0	0	0	0	0	0	0	0	0	0	0	0	0
ASV_1114	d__Bacteria	p__Proteobacteria	c__Gammaproteobacteria	o__Pseudomonadales	f__Moraxellaceae	g__Enhydrobacter	s__uncultured_bacterium	0.00500959	0	0	0	0	0	0	0	0	0	0	0	0	0	0	0	0	0	0.00500959	0	0	0	0	0	0	0	0	0	0	0
ASV_1115	d__Bacteria	p__Proteobacteria	c__Gammaproteobacteria	o__Burkholderiales	f__Comamonadaceae			0.00356814	0	0	0	0	0	0	0	0	0	0	0	0	0	0	0	0	0	0	0	0	0	0	0	0	0	0	0	0	0.00356814
ASV_1116	d__Bacteria	p__Acidobacteriota	c__Subgroup_22	o__Subgroup_22	f__Subgroup_22	g__Subgroup_22	s__uncultured_bacterium	0.00071738	0	0	0	0	0	0	0	0	0	2.27217e-05	0	0	0	0	0	0	0	0	0.000150824	0	0	0	8.76245e-05	8.93044e-05	0	0	0.000366905	0	0
ASV_1117	d__Bacteria	p__Actinobacteriota	c__Acidimicrobiia	o__Microtrichales	f__Iamiaceae	g__Iamia		0.00429972	0	0	0	0	0	0	0	0	0	0	0	0	0	0	0	0	0	0	0	0	0	0	0.000565344	0.00373437	0	0	0	0	0
ASV_1118	d__Bacteria	p__Caldisericota	c__Caldisericia	o__Caldisericales	f__Caldisericaceae	g__Caldisericum	s__uncultured_bacterium	0.000289969	0	0	0	0	0	0	0	0	0	0	0	0	0	0	0	0	8.24363e-05	0	0.000178757	0	0	0	0	0	0	0	0	0	2.87753e-05
ASV_1119	d__Archaea	p__Nanoarchaeota	c__Nanoarchaeia	o__Woesearchaeales	f__Woesearchaeales	g__Woesearchaeales		0.0049591	0	0	0	0	0	0	0	0	0	0	0	0	0	0	0	0	0	0.0049591	0	0	0	0	0	0	0	0	0	0	0
ASV_1120	d__Bacteria	p__Proteobacteria	c__Alphaproteobacteria	o__Acetobacterales	f__Acetobacteraceae	g__Roseomonas		0.0036998	0	0	0	0	0	0	0	0	0	0	0	0	0	0	0	0	0	0	0.000113755	0	0	0	0	0	0	0	0	0	0.00358604
ASV_1121	d__Bacteria	p__Proteobacteria	c__Gammaproteobacteria	o__Pseudomonadales	f__Moraxellaceae	g__Acinetobacter		0.00325266	0	0	0	0	0	0	0	0	0	0	0	0	0	0	0	0	0	0	0	0	0.00229012	0.000962542	0	0	0	0	0	0	0
ASV_1122	d__Bacteria	p__Proteobacteria	c__Gammaproteobacteria	o__Burkholderiales	f__Comamonadaceae	g__Hydrogenophaga		0.00183424	0	0	0	0	0	0	0	0	0	0	0	0	0	0	0	0	0	0	0	0	0	0	0	0	0	0.00183424	0	0	0
ASV_1123	d__Bacteria	p__Proteobacteria	c__Gammaproteobacteria	o__Burkholderiales	f__Oxalobacteraceae	g__Undibacterium	s__uncultured_bacterium	0.00376113	0	0	0	0	0	0	0	0	0	0	0	0	0	0	0	0	0	0	0	0	0	0	0	0	0	0	0	0.00376113	0
ASV_1124	d__Bacteria	p__Firmicutes	c__Bacilli	o__Staphylococcales	f__Staphylococcaceae	g__Staphylococcus		0.00686948	0	0	0	0	0	0	0	0	0	0	0	0	0	0	0	0	0	0	0	0	0	0	0	0.00686948	0	0	0	0	0
ASV_1125	d__Bacteria	p__Cyanobacteria	c__Cyanobacteriia	o__Cyanobacteriales	f__Chroococcidiopsaceae	g__Aliterella	s__uncultured_bacterium	0.00219902	0	0	0	0	0	0	0	0	0	0	0	0	0	0	0	0	0.0017351	0	3.25013e-05	0.000177952	0	0	0.000253464	0	0	0	0	0	0
ASV_1126	d__Bacteria	p__Firmicutes	c__Bacilli	o__Erysipelotrichales	f__Erysipelotrichaceae	g__Erysipelothrix		0.000553232	0	0	0	0	0	2.62992e-05	0	0	6.01052e-05	1.81774e-05	0	0	0.000349921	0	0	0	4.21702e-05	0	5.6559e-05	0	0	0	0	0	0	0	0	0	0
ASV_1127	d__Bacteria	p__Firmicutes	c__Clostridia	o__Peptostreptococcales-Tissierellales	f__Peptostreptococcales-Tissierellales	g__Anaerococcus	s__uncultured_bacterium	0	0	0	0	0	0	0	0	0	0	0	0	0	0	0	0	0	0	0	0	0	0	0	0	0	0	0	0	0	0
ASV_1128	d__Bacteria	p__Proteobacteria	c__Alphaproteobacteria	o__Sphingomonadales	f__Sphingomonadaceae			0.000160645	0	0	0	0	0	0	0	0	0	0	0	0	0	0	0	0	0	0	0	0	0	0	0.000160645	0	0	0	0	0	0
ASV_1129	d__Bacteria	p__Firmicutes	c__Bacilli	o__Staphylococcales	f__Staphylococcaceae	g__Staphylococcus		0	0	0	0	0	0	0	0	0	0	0	0	0	0	0	0	0	0	0	0	0	0	0	0	0	0	0	0	0	0
ASV_1131	d__Bacteria	p__Actinobacteriota	c__Actinobacteria	o__Corynebacteriales	f__Corynebacteriaceae	g__Corynebacterium		0.0167771	0	0	0	0	0	0	0	0	0.0167771	0	0	0	0	0	0	0	0	0	0	0	0	0	0	0	0	0	0	0	0
ASV_1132	d__Bacteria	p__Proteobacteria	c__Gammaproteobacteria	o__Burkholderiales	f__Methylophilaceae			0.00351679	0	0	0	0	0	0	0	0	0	0	0	0	0	0	0.00351679	0	0	0	0	0	0	0	0	0	0	0	0	0	0
ASV_1133	d__Bacteria	p__Actinobacteriota	c__Actinobacteria	o__Pseudonocardiales	f__Pseudonocardiaceae			0.00403465	0	0	0	0	0	0	0	0	0	0	0	0	0	0	0	0	0	0	0	0	0	0	0.000506928	0.00352773	0	0	0	0	0
ASV_1134	d__Bacteria	p__Firmicutes	c__Bacilli	o__Exiguobacterales	f__Exiguobacteraceae	g__Exiguobacterium		0.00279428	0	0	0	0	0	0	0	0	0.000207125	0.00125786	0	0	0.00130562	0	0	0	0	2.36767e-05	0	0	0	0	0	0	0	0	0	0	0
ASV_1136	d__Bacteria	p__Actinobacteriota	c__Actinobacteria	o__Micromonosporales	f__Micromonosporaceae	g__Micromonospora		0.0088229	0	0	0	0	0	0	0	0.00845293	0.000258294	0.000111675	0	0	0	0	0	0	0	0	0	0	0	0	0	0	0	0	0	0	0
ASV_1137	d__Bacteria	p__Chloroflexi	c__Anaerolineae	o__Anaerolineales	f__Anaerolineaceae	g__uncultured	s__uncultured_bacterium	0.00346743	0	0	0	0	0	0	0	0	0	0	0	0	0	0	0	0	0	0	0	0	0	0	0	0	0	0	0	0	0.00346743
ASV_1138	d__Bacteria	p__Proteobacteria	c__Alphaproteobacteria	o__Sphingomonadales	f__Sphingomonadaceae			0.0176093	0	0	0	0	0	0	0	0	0	0	0	0	5.37302e-05	0.000213438	0.000107649	0.0172345	0	0	0	0	0	0	0	0	0	0	0	0	0
ASV_1139	d__Bacteria	p__Proteobacteria	c__Gammaproteobacteria	o__Burkholderiales	f__Methylophilaceae			0.00845041	0	0	0	0	0	0	0	0	0	0	0	0	0	0	0	0	0	0	0	0	0	0	0	0	0	0	0.00845041	0	0
ASV_1140	d__Bacteria	p__Proteobacteria	c__Gammaproteobacteria	o__Enterobacterales	f__Enterobacteriaceae			0.00618904	0	0	0	0	0	0	0	0	0	0	0	0	0	0	0	0.00218317	0	0	0.00165757	0	0	0	0.00109834	0	0	0	0.00124996	0	0
ASV_1141	d__Bacteria	p__Bacteroidota	c__Bacteroidia	o__Bacteroidales	f__Prevotellaceae	g__Prevotella	s__uncultured_bacterium	0.00967703	0	0	0	0	0	0	0	0	0	0	0.00967703	0	0	0	0	0	0	0	0	0	0	0	0	0	0	0	0	0	0
ASV_1142	d__Bacteria	p__Proteobacteria	c__Gammaproteobacteria	o__Burkholderiales	f__Comamonadaceae	g__Polaromonas		0.00179476	0	0	0	0	0	0	0	0	0	0	0	0	0.00179476	0	0	0	0	0	0	0	0	0	0	0	0	0	0	0	0
ASV_1143	d__Archaea	p__Crenarchaeota	c__Bathyarchaeia	o__Bathyarchaeia	f__Bathyarchaeia	g__Bathyarchaeia	s__uncultured_archaeon	0.00279343	0	0	0	0	0	0	0	0	0	0	0	0	0	0	0.00279343	0	0	0	0	0	0	0	0	0	0	0	0	0	0
ASV_1145	d__Bacteria	p__Actinobacteriota	c__Actinobacteria	o__Propionibacteriales	f__Nocardioidaceae			0	0	0	0	0	0	0	0	0	0	0	0	0	0	0	0	0	0	0	0	0	0	0	0	0	0	0	0	0	0
ASV_1146	d__Bacteria	p__Proteobacteria	c__Gammaproteobacteria	o__Legionellales	f__Legionellaceae	g__Legionella		0.00406858	0	0	0	0	0	0	1.35074e-05	0	0	0	0	0	2.49409e-05	0	0	0	2.35532e-05	0	0	0	0	0	5.84163e-05	0	0.00390551	4.26567e-05	0	0	0
ASV_1147	d__Bacteria	p__Proteobacteria	c__Gammaproteobacteria	o__Aeromonadales	f__Aeromonadaceae	g__Aeromonas		0.000168141	0	0	0	0	0	0	0	0	0	0.000168141	0	0	0	0	0	0	0	0	0	0	0	0	0	0	0	0	0	0	0
ASV_1148	d__Bacteria	p__Actinobacteriota	c__Actinobacteria	o__Micrococcales	f__Bogoriellaceae	g__Georgenia		0.00671348	0	0	0	0.000200369	0	0	0	0.00443228	0	0	0	0	0	0	0	0	0.000600608	0	0	7.07547e-05	0	0	0	0	0	0	0	0.00140946	0
ASV_1150	d__Bacteria	p__Proteobacteria	c__Alphaproteobacteria	o__Sphingomonadales	f__Sphingomonadaceae	g__Sphingomonas	s__uncultured_bacterium	0.00483087	0	0	0	0	0	0	0	0	0	0	0	0	0	0	0	0	0	0	0	0	0	0	0	0	0	0.00483087	0	0	0
ASV_1151	d__Bacteria	p__Actinobacteriota	c__Actinobacteria	o__Actinomycetales	f__Actinomycetaceae	g__Flaviflexus	s__uncultured_bacterium	0.000266928	0.00560172	0	0	0	0	0	0	0	0	0	0	0	0	0	0	0	0	0	0	0.000266928	0	0	0	0	0	0	0	0	0
ASV_1152	d__Bacteria	p__Actinobacteriota	c__Actinobacteria	o__Frankiales	f__Nakamurellaceae	g__Nakamurella		0.00297288	0.00560172	0	0	0	0	0	0	0	0	0	0	0	0	0.00017075	0.00269387	0.000108256	0	0	0	0	0	0	0	0	0	0	0	0	0
ASV_1153	d__Bacteria	p__Proteobacteria	c__Gammaproteobacteria	o__Burkholderiales	f__Methylophilaceae			0.00834478	0.00560172	0	0	0	0	0	0	0	0	0	0	0	0	0	0	0	0	0	0	0	0	0	0	0	0	0	0.00834478	0	0
ASV_1155	d__Bacteria	p__Bacteroidota	c__Bacteroidia	o__Cytophagales	f__Hymenobacteraceae	g__Hymenobacter		0.000271456	0.00560172	0	0	8.01475e-05	5.42652e-05	6.57479e-05	0	0	0	0	0	0	0	0	0	3.60855e-05	0	0	0	0	0	0	0	0	0	0	3.521e-05	0	0
ASV_1157	d__Bacteria	p__Acidobacteriota	c__Vicinamibacteria	o__Vicinamibacterales	f__Vicinamibacteraceae	g__Vicinamibacteraceae		0.0163004	0.00560172	0	0	0	0	0	0	0	0	0	0	0	0	0	0	0	0	0	0	0.00329211	0	0	0	0	0	0	0	0.000273084	0.0127353
ASV_1158	d__Bacteria	p__Desulfobacterota	c__Desulfuromonadia	o__Geobacterales	f__Geobacteraceae	g__Citrifermentans		0.000142011	0.00560172	0	0	0	0	0	0	0	0	0	0.000142011	0	0	0	0	0	0	0	0	0	0	0	0	0	0	0	0	0	0
ASV_1159	d__Bacteria	p__Elusimicrobiota	c__Lineage_IIa	o__Lineage_IIa	f__Lineage_IIa	g__Lineage_IIa		0.00403267	0.00587689	0	0	0	0	0	0	0	0	0	0	0	2.49409e-05	0	0	0	0	0	0	0	0	0	0	0	0.00399191	1.58125e-05	0	0	0
ASV_1160	d__Bacteria	p__Firmicutes	c__Bacilli	o__Lactobacillales	f__Leuconostocaceae	g__Leuconostoc	s__Leuconostoc_pseudomesenteroides	0.00709615	0.00587689	0	0	0	0	0	0	0	0	0	0	0	0	0.000324044	0	0	0.000229644	6.15594e-05	0	0	0.00643196	4.89428e-05	0	0	0	0	0	0	0
ASV_1162	d__Bacteria	p__Proteobacteria	c__Gammaproteobacteria	o__Pseudomonadales	f__Moraxellaceae	g__Acinetobacter		0.00290453	0.00587689	0	0	0	0	0	0	0	0	0	0	0	0	0	0.00268801	0.000216513	0	0	0	0	0	0	0	0	0	0	0	0	0
ASV_1163	d__Bacteria	p__Cyanobacteria	c__Cyanobacteriia	o__Cyanobacteriales	f__Nostocaceae	g__Nodularia_PCC-9350		0.000178673	0.00587689	0	0	0	0	0	0	0	0	0	0	0	0	0	0	0	0	0	0	0	0	0	0	0	0	0	0	0.000178673	0
ASV_1164	d__Bacteria	p__Firmicutes	c__Bacilli	o__Staphylococcales	f__Staphylococcaceae	g__Staphylococcus		0	0.00587689	0	0	0	0	0	0	0	0	0	0	0	0	0	0	0	0	0	0	0	0	0	0	0	0	0	0	0	0
ASV_1165	d__Bacteria	p__Firmicutes	c__Clostridia	o__Lachnospirales	f__Lachnospiraceae	g__[Ruminococcus]_gauvreauii_group	s__uncultured_bacterium	0.0028106	0.00587689	0	0	8.01475e-05	0	0	0	0	0	0	0	0	0	0	0	0	0.00257319	0	0	5.50314e-05	0	0	0.000102229	0	0	0	0	0	0
ASV_1166	d__Bacteria	p__Proteobacteria	c__Gammaproteobacteria	o__Alteromonadales	f__Shewanellaceae	g__Shewanella		0.00303898	0.00587689	0	0	0	0.000756562	0.000230454	0	0	0	0.000441187	0	0	0	0	0	0.000559324	0	0	0.000731279	0	0	0.000233771	0	0	8.6405e-05	0	0	0	0
ASV_1167	d__Bacteria	p__Firmicutes	c__Bacilli	o__Lactobacillales	f__Streptococcaceae	g__Streptococcus		0.0022114	0.00809997	0	0	0	0	0	0	0	0	0	0	0	0	0	0	0	0	0.0022114	0	0	0	0	0	0	0	0	0	0	0
ASV_1168	d__Bacteria	p__Proteobacteria	c__Gammaproteobacteria	o__Burkholderiales	f__Methylophilaceae	g__uncultured		0.0021614	0.00809997	0	0	0	0	0	0	0	0	0	0	0	0	0	0	0	0	0.0021614	0	0	0	0	0	0	0	0	0	0	0
ASV_1169	d__Bacteria	p__Proteobacteria	c__Gammaproteobacteria	o__Pseudomonadales	f__Moraxellaceae	g__Psychrobacter		0.000408061	0.00809997	0	0	0	0.000162796	0	0	0	0	0	0	0	0	0	0	0	0	2.84121e-05	0	0	0.000106902	0	0	0	0	3.95313e-05	7.04201e-05	0	0
ASV_1170	d__Archaea	p__Crenarchaeota	c__Nitrososphaeria	o__Nitrosopumilales	f__Nitrosopumilaceae	g__Nitrosopumilaceae	s__uncultured_archaeon	0.00279634	0.012591	0	0	0	0	0	0	0	0	0	0.000101436	0	0	0	0	0	0.00267918	0	0	1.57233e-05	0	0	0	0	0	0	0	0	0
ASV_1171	d__Bacteria	p__Firmicutes	c__Clostridia	o__Clostridia_vadinBB60_group	f__Clostridia_vadinBB60_group	g__Clostridia_vadinBB60_group	s__uncultured_bacterium	0.00055668	0.012591	0	0	0	0	0	0	0	0	0	0	0	0	0	0	0.000117841	0	0	0.000150824	0	0	0	0	0.000121759	0	0	0	0	0.000166257
ASV_1172	d__Bacteria	p__Proteobacteria	c__Gammaproteobacteria	o__Burkholderiales	f__Rhodocyclaceae	g__Ferribacterium	s__uncultured_bacterium	0	0.012591	0.00511794	0.000483776	0	0	0	0	0	0	0	0	0	0	0	0	0	0	0	0	0	0	0	0	0	0	0	0	0	0
ASV_1173	d__Bacteria	p__Chloroflexi	c__Chloroflexia	o__Thermomicrobiales	f__AKYG1722	g__AKYG1722	s__uncultured_bacterium	0.0139488	0.00698932	0	0	0	0	0	0	0	0	0	7.91891e-05	0.0138696	0	0	0	0	0	0	0	0	0	0	0	0	0	0	0	0	0
ASV_1174	d__Bacteria	p__Bacteroidota	c__Bacteroidia	o__Sphingobacteriales	f__KD3-93	g__KD3-93		0.00284878	0.00698932	0	0	6.01106e-05	0	0	0	0	0	0	0	0	1.99527e-05	0	0	0	0.00253786	0	0.000102709	0	0	0	0.000102229	0	2.59215e-05	0	0	0	0
ASV_1175	d__Bacteria	p__Bacteroidota	c__Kryptonia	o__Kryptoniales	f__BSV26	g__BSV26	s__uncultured_bacterium	0.00651459	0.0119678	0	0	0.000117233	0	0	0	0	0	0	0	0	1.50504e-05	0	0	0	1.8617e-05	0	0	0.000177952	0	0	0	0	0.00618574	0	0	0	0
ASV_1176	d__Bacteria	p__Bacteroidota	c__Bacteroidia	o__Cytophagales	f__Microscillaceae	g__uncultured		0.00272561	0.0119678	0	0	0	0	0	0	0	0	0	0	0	1.12878e-05	0	0	0	0.00159855	1.4206e-05	0.000167711	8.89759e-05	0	0	0.00084488	0	0	0	0	0	0
ASV_1177	d__Bacteria	p__Actinobacteriota	c__Actinobacteria	o__Bifidobacteriales	f__Bifidobacteriaceae			0.00299927	0.0119678	0	0	0	0	0	0	0	0	0	0	0	0	0	0	0	0	0	0	0	0.00299927	0	0	0	0	0	0	0	0
ASV_1178	d__Bacteria	p__Bacteroidota	c__Bacteroidia	o__Bacteroidales	f__Porphyromonadaceae	g__Porphyromonas	s__uncultured_bacterium	0.0025775	0.0119678	0	0.000275179	0	0	0	0	0	0	0	0	0	0	0	0	0	0.00200825	0	0	0	0	0	0	0	0	0.000569251	0	0	0
ASV_1179	d__Bacteria	p__Proteobacteria	c__Alphaproteobacteria	o__Rhizobiales	f__Xanthobacteraceae			0.00352986	0.0116926	0	0	0	0.00149857	0	0	0	0	0	0	0	0	0.00135693	0.000674353	0	0	0	0	0	0	0	0	0	0	0	0	0	0
ASV_1180	d__Bacteria	p__Acidobacteriota	c__Acidobacteriae	o__Acidobacteriales	f__Acidobacteriaceae_(Subgroup_1)	g__Granulicella		0.000108911	0.0116926	0	0	0	0	6.57479e-05	0	0	0	0	0	0	0	0	0	0	0	0	0	0	0	0	0	0	0	0	0	0	4.3163e-05
ASV_1181	d__Bacteria	p__Proteobacteria	c__Gammaproteobacteria	o__Burkholderiales	f__Comamonadaceae			0	0.0116926	0	0	0	0	0	0	0	0	0	0	0	0	0	0	0	0	0	0	0	0	0	0	0	0	0	0	0	0
ASV_1182	d__Bacteria	p__Proteobacteria	c__Gammaproteobacteria	o__Pasteurellales	f__Pasteurellaceae	g__Aggregatibacter	s__uncultured_bacterium	0.002804	0.0116926	0	0	0	0	0	0	0	0	0	0	0	7.00062e-05	6.07583e-05	0.00249281	0.000180427	0	0	0	0	0	0	0	0	0	0	0	0	0
ASV_1183	d__Bacteria	p__Actinobacteriota	c__Actinobacteria	o__Propionibacteriales	f__Propionibacteriaceae	g__Cutibacterium	s__uncultured_bacterium	0.00394007	0.0116926	0	0	0	0	0	0	0	0	0	0	0	0	0	0	0	0	0	0	0	0	0	0	0	0.00394007	0	0	0	0
ASV_1184	d__Bacteria	p__Proteobacteria	c__Gammaproteobacteria	o__Burkholderiales	f__Hydrogenophilaceae	g__uncultured	s__uncultured_bacterium	0.000953066	0.0116926	0	0	0	0	0	0	0	0	0	0.000277162	0	0	0	0	0	0	0	0	0	0	0	0.000675904	0	0	0	0	0	0
ASV_1185	d__Bacteria	p__Proteobacteria	c__Alphaproteobacteria	o__Sphingomonadales	f__Sphingomonadaceae	g__Sphingomonas		0	0.0116926	0.00222307	0	0	0	0	0	0	0	0	0	0	0	0	0	0	0	0	0	0	0	0	0	0	0	0	0	0	0
ASV_1186	d__Bacteria	p__Firmicutes	c__Bacilli	o__Staphylococcales	f__Staphylococcaceae	g__Staphylococcus		0.0045584	0.00946954	0	0	0	0	0	0	0.00248949	0	0	0	0	0	0	0	0	0	0	0	0	0.00206891	0	0	0	0	0	0	0	0
ASV_1187	d__Bacteria	p__Chloroflexi	c__Dehalococcoidia					0.000747707	0.00946954	0	0	0	0	0	0	0	0	0	0.000418193	0.000150757	0	0	0	0	0	0	0.000178757	0	0	0	0	0	0	0	0	0	0
ASV_1189	d__Bacteria	p__Firmicutes	c__Clostridia	o__Clostridiales	f__Clostridiaceae			0	0.00946954	0.00214172	0.00234935	0	0	0	0	0	0	0	0	0	0	0	0	0	0	0	0	0	0	0	0	0	0	0	0	0	0
ASV_1190	d__Archaea	p__Crenarchaeota	c__Nitrososphaeria	o__Nitrosopumilales	f__Nitrosopumilaceae	g__Nitrosopumilaceae	s__uncultured_archaeon	0.00180087	0.00497847	0	0	0.00017585	0	0	0	0	0	0	0	0	4.13885e-05	0	0	0	0.00149308	0	4.8752e-05	0	0	0	0	0	4.17955e-05	0	0	0	0
ASV_1191	d__Bacteria	p__Chloroflexi	c__Anaerolineae	o__Anaerolineales	f__Anaerolineaceae	g__Anaerolinea		0.000160469	0.00497847	0	0	0	0	7.88975e-05	0	0	0	0	0	0	0	0	0	0	0	0	0	0	0	8.15714e-05	0	0	0	0	0	0	0
ASV_1192	d__Bacteria	p__Proteobacteria	c__Gammaproteobacteria	o__Burkholderiales	f__Methylophilaceae			0.00813727	0.00497847	0	0	0	0	0	0	0	0	0	0	0	0	0	0	0.00813727	0	0	0	0	0	0	0	0	0	0	0	0	0
ASV_1193	d__Bacteria	p__Bacteroidota	c__Bacteroidia	o__Sphingobacteriales	f__Sphingobacteriaceae	g__Pedobacter		0.00407103	0.00497847	0	0	0	0	0	0	0	0	0	0	0	0	0	0	0	0	0	0	0	0	0	0.000682177	0.00338886	0	0	0	0	0
ASV_1194	d__Bacteria	p__Cyanobacteria	c__Sericytochromatia	o__Sericytochromatia	f__Sericytochromatia	g__Sericytochromatia	s__uncultured_bacterium	0	0.00497847	0.00254366	0.00243482	0	0	0	0	0	0	0	0	0	0	0	0	0	0	0	0	0	0	0	0	0	0	0	0	0	0
ASV_1195	d__Bacteria	p__Proteobacteria	c__Gammaproteobacteria	o__Burkholderiales	f__Comamonadaceae	g__Rhodoferax		0.00591732	0	0	0	0	0	0.00591732	0	0	0	0	0	0	0	0	0	0	0	0	0	0	0	0	0	0	0	0	0	0	0
ASV_1196	d__Bacteria	p__Firmicutes	c__Bacilli	o__Staphylococcales	f__Staphylococcaceae	g__Staphylococcus		0	0	0	0	0	0	0	0	0	0	0	0	0	0	0	0	0	0	0	0	0	0	0	0	0	0	0	0	0	0
ASV_1198	d__Bacteria	p__Proteobacteria	c__Alphaproteobacteria	o__Rhizobiales	f__Rhizobiaceae			0.00826234	0	0	0	0	0	0	0	0.00791104	0.000351298	0	0	0	0	0	0	0	0	0	0	0	0	0	0	0	0	0	0	0	0
ASV_1200	d__Bacteria	p__Patescibacteria	c__Parcubacteria	o__Candidatus_Azambacteria	f__Candidatus_Azambacteria	g__Candidatus_Azambacteria		0.0026203	0	0	0	0	0	0	0	0	0	0	0	0	0	0	0	0	0.0026203	0	0	0	0	0	0	0	0	0	0	0	0
ASV_1201	d__Bacteria	p__Proteobacteria	c__Alphaproteobacteria	o__Caulobacterales	f__Caulobacteraceae	g__Brevundimonas		7.25111e-05	0	0	0	0	0	0	0	0	0	0	0	0	0	0	7.25111e-05	0	0	0	0	0	0	0	0	0	0	0	0	0	0
ASV_1202	d__Bacteria	p__Proteobacteria	c__Gammaproteobacteria	o__Burkholderiales	f__Methylophilaceae	g__uncultured		0.00461378	0	0	0	0	0	0	0	0	0	0	0	0	0	0	0	0.00141409	0	0	0	0.00319969	0	0	0	0	0	0	0	0	0
ASV_1203	d__Bacteria	p__Patescibacteria	c__Gracilibacteria	o__Candidatus_Peribacteria	f__Candidatus_Peribacteria	g__Candidatus_Peribacteria	s__uncultured_bacterium	0.00617181	0	0	0	0	0	0	0	0	0	0	0	0	0	0	0	0	0	0	0	0	0	0	0	0	0.00617181	0	0	0	0
ASV_1204	d__Bacteria	p__Firmicutes	c__Bacilli	o__Staphylococcales	f__Staphylococcaceae	g__Staphylococcus		0.00347484	0	0	0	0	0	0	0	0	0	0	0	0	0	0	0	0	0	0	0	0.00347484	0	0	0	0	0	0	0	0	0
ASV_1206	d__Bacteria	p__Proteobacteria	c__Gammaproteobacteria	o__Pseudomonadales	f__Pseudomonadaceae	g__Pseudomonas		0.0031655	0	0	0	0	0	0	0	0	0	0	0	0	0	0	0	0	0	0	0	0	0	0	0	0.0031655	0	0	0	0	0
ASV_1207	d__Bacteria	p__Actinobacteriota	c__Actinobacteria	o__Kineosporiales	f__Kineosporiaceae	g__Quadrisphaera	s__uncultured_bacterium	0.0043768	0	0	0	0.000100184	0.000451027	0	0	0.000902873	0	0	0	0.000837683	0	0.000747033	0	0	0	0.000969599	0	2.35849e-05	0.000344819	0	0	0	0	0	0	0	0
ASV_1208	d__Bacteria	p__Proteobacteria	c__Gammaproteobacteria	o__Burkholderiales	f__Comamonadaceae			0.0151892	0	0	0	0	0	0	0	0	0.0151892	0	0	0	0	0	0	0	0	0	0	0	0	0	0	0	0	0	0	0	0
ASV_1209	d__Bacteria	p__Proteobacteria	c__Gammaproteobacteria	o__Burkholderiales	f__Oxalobacteraceae			0.0177141	0.0021673	0	0	0	0	0	0	0	0	0	0	0	0	0	0	0	0	0	0	0.0173058	0.00026445	0.000143859	0	0	0	0	0	0	0
ASV_1210	d__Bacteria	p__Proteobacteria	c__Gammaproteobacteria	o__Burkholderiales	f__Comamonadaceae	g__uncultured		0.00340961	0.0021673	0	0	0	0	0	0	0	0	0	0	0	0	0	0	0	0	0	0	0	0	0	0	0.00340961	0	0	0	0	0
ASV_1211	d__Bacteria	p__Proteobacteria	c__Gammaproteobacteria	o__Xanthomonadales	f__Xanthomonadaceae	g__Stenotrophomonas		0.0154574	0.0021673	0	0	0.000293083	0	0	0	0	0	0	0.0145139	0.000386194	0	0	0	0	0	0	0	0.00022244	0	0	0	0	4.17955e-05	0	0	0	0
ASV_1212	d__Bacteria	p__Proteobacteria	c__Gammaproteobacteria	o__Pseudomonadales	f__Moraxellaceae	g__Acinetobacter		0.00813436	0.0021673	0	0	0	0	0	0	0.00806447	0	6.98812e-05	0	0	0	0	0	0	0	0	0	0	0	0	0	0	0	0	0	0	0
ASV_1213	d__Bacteria	p__Actinobacteriota	c__Actinobacteria	o__Frankiales	f__Geodermatophilaceae	g__Blastococcus	s__uncultured_bacterium	0.00336584	0.0021673	0	0	0	0	0	0	0	0	0	0	0	0	0	0	0	0	0	0	0.00178459	0	0	0	0	0	0.00158125	0	0	0
ASV_1214	d__Bacteria	p__Proteobacteria	c__Gammaproteobacteria	o__Burkholderiales	f__Comamonadaceae	g__Aquabacterium		0.00318324	0.0021673	0	0	0	0	0	0	0	0	0	0	0	0	0	0.00318324	0	0	0	0	0	0	0	0	0	0	0	0	0	0
ASV_1215	d__Bacteria	p__Proteobacteria	c__Alphaproteobacteria	o__Rhizobiales	f__Devosiaceae	g__Pelagibacterium		0.00317598	0.0021673	0	0	0	0	0	0	0	0	0	0	0	0	0	0.00317598	0	0	0	0	0	0	0	0	0	0	0	0	0	0
ASV_1216	d__Bacteria	p__Patescibacteria	c__ABY1	o__Candidatus_Komeilibacteria	f__Candidatus_Komeilibacteria	g__Candidatus_Komeilibacteria	s__uncultured_bacterium	0.00210214	0.0021673	0	0	0	0	0	0	0	0	0	0	0	0	0	0	0	0	0.00202673	7.54119e-05	0	0	0	0	0	0	0	0	0	0
ASV_1217	d__Bacteria	p__Actinobacteriota	c__Actinobacteria	o__Corynebacteriales	f__Nocardiaceae	g__Williamsia		0.00257974	0.0021673	0	0	0	0	0	0	0	0	0	0	0	1.99527e-05	7.08846e-05	0.0024889	0	0	0	0	0	0	0	0	0	0	0	0	0	0
ASV_1218	d__Bacteria	p__Proteobacteria	c__Alphaproteobacteria	o__Rhodobacterales	f__Rhodobacteraceae	g__Paracoccus		0.0016234	0.0021673	0	0	0	0	0	0	0	0	0	0	0	0	0	0	0	0.0016234	0	0	0	0	0	0	0	0	0	0	0	0
ASV_1219	d__Bacteria	p__Proteobacteria	c__Alphaproteobacteria	o__Rhizobiales	f__Hyphomicrobiaceae	g__Hyphomicrobium	s__uncultured_bacterium	0.00636876	0.0021673	0	0	0	0	0	0.000175505	0.000109439	0.00589031	0	0	0	0	0	0	0	0	0	0	0	0	0.000130514	0	6.29951e-05	0	0	0	0	0
ASV_1220	d__Bacteria	p__Proteobacteria	c__Gammaproteobacteria	o__Pseudomonadales	f__Moraxellaceae			0.00310866	0.0021673	0	0	0	0	0	0.000100494	0.000109439	0.000276167	0.00130778	0	0	7.52519e-06	0	0	0	0.000997525	3.03e-05	0.000251567	0	0	0	0	0	2.78637e-05	0	0	0	0
ASV_1221	d__Bacteria	p__Actinobacteriota	c__Actinobacteria	o__Kineosporiales	f__Kineosporiaceae			0.00349335	0.0021673	0	0	0	0	0	0	0	7.51315e-05	0	0	0	0	0	0	0	0	0	0	0	0	0	0.000292082	0.00312613	0	0	0	0	0
ASV_1222	d__Archaea	p__Halobacterota	c__Methanosarcinia	o__Methanosarciniales	f__Methanosaetaceae	g__Methanosaeta		0.016619	0.0021673	0	0	0	0	0	0	0	0	0	0	0	0	0	8.19874e-05	0.016537	0	0	0	0	0	0	0	0	0	0	0	0	0
ASV_1223	d__Bacteria	p__Proteobacteria	c__Gammaproteobacteria	o__Pseudomonadales	f__Moraxellaceae	g__Alkanindiges		2.60638e-05	0.0021673	0	0	0	0	0	0	0	0	0	0	0	0	0	0	0	2.60638e-05	0	0	0	0	0	0	0	0	0	0	0	0
ASV_1224	d__Archaea	p__Euryarchaeota	c__Thermococci	o__Methanofastidiosales	f__Methanofastidiosaceae	g__Candidatus_Methanofastidiosum		0.0025817	0.0021673	0	0	0	0	0	0	0	0	0	0	0	9.97636e-06	0	0.00250647	0	0	0	0	0	0	6.52571e-05	0	0	0	0	0	0	0
ASV_1225	d__Bacteria	p__Actinobacteriota	c__Thermoleophilia	o__Solirubrobacterales	f__Solirubrobacteraceae	g__Solirubrobacter	s__uncultured_bacterium	0.00171847	0.0021673	0	0	0	0	0	0	0	0	0	0	0	0	0	0	0	0.00156036	6.05999e-05	9.75039e-05	0	0	0	0	0	0	0	0	0	0
ASV_1226	d__Bacteria	p__Actinobacteriota	c__Actinobacteria	o__Micrococcales	f__Microbacteriaceae			0.00338094	0.0021673	0	0	0	0	0.000105197	0	0	0	0	0	0	0	0	0	0	0	0	0	0	0	0	0	0.00327575	0	0	0	0	0
ASV_1227	d__Bacteria	p__Proteobacteria	c__Gammaproteobacteria	o__Gammaproteobacteria_Incertae_Sedis	f__Unknown_Family	g__Acidibacter	s__uncultured_bacterium	0	0.0021673	0.00209086	7.64386e-05	0	0	0	0	0	0	0	0	0	0	0	0	0	0	0	0	0	0	0	0	0	0	0	0	0	0
ASV_1229	d__Bacteria	p__Proteobacteria	c__Gammaproteobacteria	o__Aeromonadales	f__Aeromonadaceae			0.00187248	0	0	0	0	0	0	0	0	0	0	0	0	0	0	0	0	0.00187248	0	0	0	0	0	0	0	0	0	0	0	0
ASV_1230	d__Bacteria	p__Deinococcota	c__Deinococci	o__Deinococcales	f__Deinococcaceae	g__Deinococcus		0.00191852	0	0	0	0	0	0	0	0	0	0	0	0	0	0	0	0	0.00156755	0	9.75039e-05	0	0	0	0.000253464	0	0	0	0	0	0
ASV_1231	d__Archaea	p__Crenarchaeota	c__Bathyarchaeia	o__Bathyarchaeia	f__Bathyarchaeia	g__Bathyarchaeia		0.00312523	0	0	0	0	0	0	0	0	0	0	0	0	0	0	0.00312523	0	0	0	0	0	0	0	0	0	0	0	0	0	0
ASV_1233	d__Bacteria	p__Proteobacteria	c__Gammaproteobacteria	o__Burkholderiales	f__Comamonadaceae			0	0	0	0	0	0	0	0	0	0	0	0	0	0	0	0	0	0	0	0	0	0	0	0	0	0	0	0	0	0
ASV_1234	d__Bacteria	p__Proteobacteria	c__Alphaproteobacteria	o__Sphingomonadales	f__Sphingomonadaceae	g__Sphingomonas		0.0001265	0	0	0	0	0	0	0	0	0	0	0	0	0	0	0	0	0	0	0	0	0	0	0	0	0	0.0001265	0	0	0
ASV_1235	d__Bacteria	p__Proteobacteria	c__Gammaproteobacteria	o__Burkholderiales	f__Comamonadaceae			0.00442633	0	0	0	0	0.000305535	0	0	0	0	0	0	0	0	0	0	0	0	0.0041208	0	0	0	0	0	0	0	0	0	0	0
ASV_1236	d__Bacteria	p__Proteobacteria	c__Gammaproteobacteria	o__Burkholderiales	f__Comamonadaceae	g__uncultured		0.000331737	0	0	0	0	0	0	0	0	0	0.000331737	0	0	0	0	0	0	0	0	0	0	0	0	0	0	0	0	0	0	0
ASV_1238	d__Bacteria	p__Actinobacteriota	c__Actinobacteria	o__Micrococcales	f__Micrococcaceae	g__Micrococcus		0	0	0	0	0	0	0	0	0	0	0	0	0	0	0	0	0	0	0	0	0	0	0	0	0	0	0	0	0	0
ASV_1239	d__Bacteria	p__Proteobacteria	c__Gammaproteobacteria	o__Burkholderiales	f__Comamonadaceae			0.0116128	0	0	0	0	0.0116128	0	0	0	0	0	0	0	0	0	0	0	0	0	0	0	0	0	0	0	0	0	0	0	0
ASV_1240	d__Bacteria	p__Desulfobacterota	c__Desulfovibrionia	o__Desulfovibrionales	f__Desulfovibrionaceae	g__Desulfovibrio		0.00012632	0	0	0	0	0	0	0	0	0	0	0	0	3.99054e-05	0	0	0	4.71065e-05	0	0	3.93082e-05	0	0	0	0	0	0	0	0	0
ASV_1241	d__Bacteria	p__Patescibacteria	c__Parcubacteria					0.00256028	0	0	0	0	0	0	0	0	0	0	0	0	0	0	0	0	0.00248487	0	7.54119e-05	0	0	0	0	0	0	0	0	0	0
ASV_1243	d__Bacteria	p__Proteobacteria	c__Alphaproteobacteria	o__Sphingomonadales	f__Sphingomonadaceae	g__Sphingomonas		0.00331654	0.00461911	0	0	0	0	0	0	0	0	0	0	0	0	0	6.44187e-05	0	0	0	0	0	0	0	0	0.00325212	0	0	0	0	0
ASV_1244	d__Bacteria	p__Proteobacteria	c__Gammaproteobacteria	o__Burkholderiales	f__SC-I-84	g__SC-I-84		0.00434857	0.00461911	0	0	0	0	0	0.00013048	0	7.51315e-05	0.00414296	0	0	0	0	0	0	0	0	0	0	0	0	0	0	0	0	0	0	0
ASV_1245	d__Bacteria	p__Bdellovibrionota	c__Oligoflexia	o__0319-6G20	f__0319-6G20	g__0319-6G20	s__uncultured_bacterium	0.00365493	0.00461911	0	0	0	0	0	0	0	0	0	0	0	0	0	0	0	0	0	0	0	0	0	0	0	0.00365493	0	0	0	0
ASV_1246	d__Bacteria	p__Patescibacteria	c__Parcubacteria	o__Parcubacteria	f__Parcubacteria	g__Parcubacteria	s__uncultured_bacterium	0.00576956	0.00461911	0	0	0	0	0	0	0	0	0	0	0	0	0	0	0	1.8617e-05	0	0	0	0	0	0	0	0.00569812	0	5.2815e-05	0	0
ASV_1247	d__Bacteria	p__Cyanobacteria	c__Vampirivibrionia					0.00741984	0.00461911	0	0	0	0	0	0	0	0	0	0	0	0	0	0	0	0	0	0.000113755	0	0	0	0	0	0	0	0.00730608	0	0
ASV_1248	d__Bacteria	p__Actinobacteriota	c__Actinobacteria	o__Frankiales	f__Frankiales	g__Frankiales	s__uncultured_bacterium	0.000297568	0.00461911	0	0	0	0	0	0	0	0	0	0	0	0	0	0	0	0	0	0	0	0	0	0.000146041	0.000151527	0	0	0	0	0
ASV_1249	d__Bacteria	p__Proteobacteria	c__Gammaproteobacteria	o__Burkholderiales	f__Neisseriaceae	g__Neisseria		0.00266982	0.00461911	0	0	0	0	0	0	0	0	0	0	0	5.487e-05	0.000277469	0.00233748	0	0	0	0	0	0	0	0	0	0	0	0	0	0
ASV_1250	d__Bacteria	p__Actinobacteriota	c__Actinobacteria	o__Pseudonocardiales	f__Pseudonocardiaceae	g__Pseudonocardia	s__uncultured_bacterium	0.00261808	0.00461911	0	0	0	0	0	0	0	0	0	0	0	0	0.000192094	0	0	0.00242598	0	0	0	0	0	0	0	0	0	0	0	0
ASV_1251	d__Bacteria	p__Proteobacteria	c__Gammaproteobacteria	o__Burkholderiales	f__Oxalobacteraceae	g__Undibacterium	s__uncultured_bacterium	0	0.00461911	0	0	0	0	0	0	0	0	0	0	0	0	0	0	0	0	0	0	0	0	0	0	0	0	0	0	0	0
ASV_1252	d__Bacteria	p__Firmicutes	c__Bacilli	o__Staphylococcales	f__Staphylococcaceae	g__Staphylococcus		0.00198884	0.00461911	0	0	0	0	0	0	0	0	0	0	0	0	0	0	0	0	0.00198884	0	0	0	0	0	0	0	0	0	0	0
ASV_1253	d__Bacteria	p__Proteobacteria	c__Gammaproteobacteria	o__Burkholderiales	f__Comamonadaceae	g__Aquabacterium		0	0.00461911	0	0	0	0	0	0	0	0	0	0	0	0	0	0	0	0	0	0	0	0	0	0	0	0	0	0	0	0
ASV_1255	d__Bacteria	p__Patescibacteria	c__Parcubacteria					0.00309564	0.00461911	0	0	0	0	0	0	0	0	0	0	0	0	0	0	0	0	0	0	0	0	0	0	0	0	0	0	0.000117392	0.00297825
ASV_1256	d__Archaea	p__Crenarchaeota	c__Nitrososphaeria	o__Nitrososphaerales	f__Nitrososphaeraceae	g__Nitrososphaeraceae		0.00845979	0.00461911	0	0	0	0	0	0	0	0	0	0.00845979	0	0	0	0	0	0	0	0	0	0	0	0	0	0	0	0	0	0
ASV_1257	d__Bacteria	p__Firmicutes	c__Clostridia	o__Clostridiales	f__Clostridiaceae	g__Proteiniclasticum	s__uncultured_bacterium	0.000624462	0.00461911	0	0	0	0	0	0	0	0	0	0	0	0	0	0	0	0	0	0.000169677	0	0	0	0.000454785	0	0	0	0	0	0
ASV_1258	d__Bacteria	p__Firmicutes	c__Bacilli	o__Lactobacillales	f__Leuconostocaceae	g__Leuconostoc		0.000259729	0.00461911	0	0	0.000120221	0	0	0	0	0	0	0	0	2.49409e-05	0	0	0	0	0	0	7.07547e-05	0	0	4.38122e-05	0	0	0	0	0	0
ASV_1259	d__Bacteria	p__Proteobacteria	c__Alphaproteobacteria	o__Rhizobiales	f__Beijerinckiaceae	g__Microvirga		0.00207508	0.00461911	0	0	0	0	0	0	0	0	0	0	0	0.00207508	0	0	0	0	0	0	0	0	0	0	0	0	0	0	0	0
ASV_1260	d__Bacteria	p__Bacteroidota	c__Bacteroidia	o__Cytophagales	f__Cytophagaceae	g__Cytophaga	s__uncultured_bacterium	0.00318662	0.00461911	0	0	0	0	0	0	0	0	0	0	0	0	0	0	0	0	0	0	0	0	0	0	0	0	0	0	0.00318662	0
ASV_1261	d__Bacteria	p__Firmicutes	c__Bacilli	o__Staphylococcales	f__Staphylococcaceae	g__Staphylococcus		0	0.00461911	0	0	0	0	0	0	0	0	0	0	0	0	0	0	0	0	0	0	0	0	0	0	0	0	0	0	0	0
ASV_1262	d__Bacteria	p__Proteobacteria	c__Gammaproteobacteria	o__Oceanospirillales	f__Halomonadaceae	g__Halomonas		0	0.00461911	0.00268336	0.00193575	0	0	0	0	0	0	0	0	0	0	0	0	0	0	0	0	0	0	0	0	0	0	0	0	0	0
ASV_1263	d__Bacteria	p__Actinobacteriota	c__Actinobacteria	o__Actinomycetales	f__Actinomycetaceae	g__Actinomyces		0.0157922	0	0	0	0	0	0	0	0	0	0	0.0156794	0.000112765	0	0	0	0	0	0	0	0	0	0	0	0	0	0	0	0	0
ASV_1264	d__Bacteria	p__Proteobacteria	c__Alphaproteobacteria	o__Acetobacterales	f__Acetobacteraceae	g__Roseomonas		0.00213201	0	0	0	0	0	0	0	0	0	0	0	0	0.00202529	0.000106719	0	0	0	0	0	0	0	0	0	0	0	0	0	0	0
ASV_1266	d__Bacteria	p__Bdellovibrionota	c__Oligoflexia	o__0319-6G20	f__0319-6G20	g__0319-6G20		4.3567e-05	0	0	0	0	0	0	9.00495e-06	0	0	0	0	0	0	0	0	0	0	0	0	0	0	0	0	0	3.4562e-05	0	0	0	0
ASV_1267	d__Bacteria	p__Bacteroidota	c__Bacteroidia	o__Sphingobacteriales	f__env.OPS_17	g__env.OPS_17	s__uncultured_bacterium	0.00356989	0	0	0	0	0	0	0	0	9.01578e-05	0	0	0	0	0	0	0	0	0	0	0	0	0	0	0.00303951	0	0	0	0.000440218	0
ASV_1268	d__Archaea	p__Halobacterota	c__Methanosarcinia	o__Methanosarciniales	f__Methanosarcinaceae	g__Methanosarcina		0.00204104	0	0	0	0	0	0	0	0	0	0	0	0	0.00199028	0	5.07577e-05	0	0	0	0	0	0	0	0	0	0	0	0	0	0
ASV_1269	d__Bacteria	p__Proteobacteria	c__Gammaproteobacteria	o__Burkholderiales	f__Methylophilaceae			0.012062	0	0	0	0	0	0	0	0	0	0	0	0	0	0	0	0	0	0	0	0	0	0	0	0	0	0	0	0.012062	0
ASV_1270	d__Bacteria	p__Chloroflexi	c__Dehalococcoidia	o__GIF9	f__AB-539-J10	g__AB-539-J10	s__uncultured_bacterium	8.11491e-05	0	0	0	0	0	0	0	0	0	0	8.11491e-05	0	0	0	0	0	0	0	0	0	0	0	0	0	0	0	0	0	0
ASV_1271	d__Bacteria	p__Proteobacteria	c__Alphaproteobacteria	o__Sphingomonadales	f__Sphingomonadaceae	g__Sphingomonas		0.00252726	0	0	0	0	0	0	0	0	0	0	0.00110865	0	0	0	0	0	0.00141861	0	0	0	0	0	0	0	0	0	0	0	0
ASV_1272	d__Bacteria	p__Desulfobacterota	c__Desulfovibrionia	o__Desulfovibrionales	f__Desulfovibrionaceae	g__Desulfovibrio	s__uncultured_bacterium	0.00567784	0.00082203	0	0	0	0	0	0	0	0	0	0	0	0	0	0	0	0	0	0	0	0	0	0	0.00567784	0	0	0	0	0
ASV_1273	d__Bacteria	p__Proteobacteria	c__Gammaproteobacteria	o__Burkholderiales	f__Comamonadaceae	g__Hydrogenophaga		0.00744113	0.00082203	0	0	0	0	0	0	0	0	0	0	0	0	0	0	0	3.7234e-05	9.08999e-05	0.00731299	0	0	0	0	0	0	0	0	0	0
ASV_1274	d__Bacteria	p__Proteobacteria	c__Gammaproteobacteria	o__Pseudomonadales	f__Pseudomonadaceae	g__Pseudomonas		0.0115337	0.00082203	0	0	0	0	0	0	0	0	0	0	0	0	0	0	0	0	0	0	0	0	0	0	0	0	0	0	0.0115337	0
ASV_1276	d__Bacteria	p__Actinobacteriota	c__Actinobacteria	o__Micrococcales	f__Intrasporangiaceae	g__Ornithinimicrobium		0.00192728	0.00427919	0	0	0	0	0	0	0	0	0	0	0	0	0	0	0	0	0.00192728	0	0	0	0	0	0	0	0	0	0	0
ASV_1277	d__Bacteria	p__Bacteroidota	c__Bacteroidia	o__Sphingobacteriales	f__NS11-12_marine_group	g__NS11-12_marine_group	s__uncultured_bacterium	0.00495787	0.00427919	0	0	0	0	0	0	0	0	0	0	0	0	0	0	0	0.000409574	0	0	0	0	0	0.00319829	0	0	0	0	0.00135	0
ASV_1278	d__Bacteria	p__Patescibacteria	c__Parcubacteria					0	0.00427919	0	0	0	0	0	0	0	0	0	0	0	0	0	0	0	0	0	0	0	0	0	0	0	0	0	0	0	0
ASV_1279	d__Bacteria	p__Proteobacteria	c__Gammaproteobacteria	o__Burkholderiales	f__Neisseriaceae	g__Alysiella		0.00737746	0.00427919	0	0	0	0.000162796	0	0	0.00706277	0	0	0	0	0	0.000151896	0	0	0	0	0	0	0	0	0	0	0	0	0	0	0
ASV_1280	d__Bacteria	p__Firmicutes	c__Clostridia	o__Lachnospirales	f__Lachnospiraceae	g__Blautia	s__uncultured_bacterium	0.00195543	0.00427919	0	0	0	0	0	0	0	0	0	0	0	0	0	0	0	0	0.00189887	5.6559e-05	0	0	0	0	0	0	0	0	0	0
ASV_1281	d__Bacteria	p__Cyanobacteria	c__Cyanobacteriia	o__Cyanobacteriales	f__Chroococcidiopsaceae	g__Aliterella	s__uncultured_bacterium	0.00268009	0.00427919	0	0	0	0	0	0	0	0	0	0	0	0	0	0	0	0	0	0	0	0.00256987	0.000110213	0	0	0	0	0	0	0
ASV_1282	d__Bacteria	p__Proteobacteria	c__Gammaproteobacteria	o__Enterobacterales	f__Erwiniaceae	g__Erwinia		0.00290631	0.00427919	0	0	0	0	0	0	0	0	0	0	0	0	0	0	0	0	0	0	0	0	0	0	0	0	0	0	0	0.00290631
ASV_1283	d__Bacteria	p__Proteobacteria	c__Alphaproteobacteria	o__Sphingomonadales	f__Sphingomonadaceae	g__Sphingomonas		0.0040703	0.00427919	0	0	0	0	0	0	0	0	0	0	0	0	0	0	0	0	0.0040703	0	0	0	0	0	0	0	0	0	0	0
ASV_1285	d__Bacteria	p__Proteobacteria	c__Alphaproteobacteria	o__Paracaedibacterales	f__Paracaedibacteraceae			0	0.00427919	0	0	0	0	0	0	0	0	0	0	0	0	0	0	0	0	0	0	0	0	0	0	0	0	0	0	0	0
ASV_1286	d__Bacteria	p__Gemmatimonadota	c__Gemmatimonadetes	o__Gemmatimonadales	f__Gemmatimonadaceae	g__uncultured		0.000282929	0.00427919	0	0	0	0	0	0	0	0	0	0	0	0	0	0	0.000235682	0	0	0	0	0	0	0	4.72463e-05	0	0	0	0	0
ASV_1287	d__Bacteria	p__Proteobacteria	c__Gammaproteobacteria	o__Burkholderiales	f__Alcaligenaceae	g__Alcaligenes		0.00273146	0.00427919	0	0	0	0	0	0	0	0	0	0	0.000209421	0	0	0	0	0	0	0	0	0.00252204	0	0	0	0	0	0	0	0
ASV_1288	d__Archaea	p__Crenarchaeota	c__Bathyarchaeia	o__Bathyarchaeia	f__Bathyarchaeia	g__Bathyarchaeia		0.00234835	0.00427919	0	0	0	0	0	0	0	0	0	0	0	0	0	0.00234835	0	0	0	0	0	0	0	0	0	0	0	0	0	0
ASV_1289	Unassigned							0.00300321	0.00427919	0	0	0	0	1.38828e-05	0	0	0.000138083	0	0	0	0	0	0	0	0	0	0	0	0	5.39471e-05	0	0	0	3.19925e-05	0	0.00276531	0
ASV_1290	d__Bacteria	p__Proteobacteria	c__Alphaproteobacteria	o__Caulobacterales	f__Caulobacteraceae	g__uncultured		0.00703526	0.00427919	0	0	0	0	0	0	0	0	0	0	0	0	2.02528e-05	0	0	0	1.4206e-05	0	0	0.00696817	3.26286e-05	0	0	0	0	0	0	0
ASV_1291	d__Bacteria	p__Proteobacteria	c__Gammaproteobacteria	o__Pseudomonadales	f__Moraxellaceae	g__Enhydrobacter	s__uncultured_bacterium	0.00404	0.00427919	0	0	0	0	0	0	0	0	0	0	0	0	0	0	0	0	0.00404	0	0	0	0	0	0	0	0	0	0	0
ASV_1292	d__Archaea	p__Crenarchaeota	c__Bathyarchaeia	o__Bathyarchaeia	f__Bathyarchaeia	g__Bathyarchaeia	s__uncultured_archaeon	3.88718e-05	0.00427919	0.00073721	8.482e-05	0	0	3.88718e-05	0	0	0	0	0	0	0	0	0	0	0	0	0	0	0	0	0	0	0	0	0	0	0
ASV_1293	d__Bacteria	p__Firmicutes	c__Bacilli	o__Bacillales	f__Bacillaceae	g__Bacillus		0.00150128	0.00345716	0	0	0	0	0	0	0	0	0	0	0	0.00150128	0	0	0	0	0	0	0	0	0	0	0	0	0	0	0	0
ASV_1295	d__Bacteria	p__Bacteroidota	c__Bacteroidia	o__Flavobacteriales	f__Weeksellaceae	g__Cloacibacterium	s__uncultured_bacterium	0.00305639	0.0074705	0	0	0	0	0	0	0	0	0	0	0	0	0	0	0	0	0	0	0	0	0	0	0	0	0	0	0.00305639	0
ASV_1296	d__Bacteria	p__Bacteroidota	c__Bacteroidia	o__Chitinophagales	f__Chitinophagaceae			0	0.0074705	0.00221576	0.0012414	0	0	0	0	0	0	0	0	0	0	0	0	0	0	0	0	0	0	0	0	0	0	0	0	0	0
ASV_1297	d__Bacteria	p__Actinobacteriota	c__Actinobacteria	o__Pseudonocardiales	f__Pseudonocardiaceae	g__Saccharopolyspora		0.00739087	0.00401334	0	0	0	0	0	0	0.00678616	0.000484913	0.000119796	0	0	0	0	0	0	0	0	0	0	0	0	0	0	0	0	0	0	0
ASV_1299	d__Bacteria	p__Actinobacteriota	c__Actinobacteria	o__Corynebacteriales	f__Corynebacteriaceae	g__Corynebacterium	s__uncultured_bacterium	0.00398094	0.00401334	0	0	0	0	0	0	0	0	0	0	0	0	0	0	0	0	0.0039289	0	0	5.20481e-05	0	0	0	0	0	0	0	0
ASV_1301	d__Bacteria	p__Proteobacteria	c__Alphaproteobacteria	o__Rickettsiales	f__Rickettsiaceae	g__uncultured		0.00301066	0.00401334	0	0	0	0	0	0	0	0	3.99321e-05	0	0	0	0	0	3.60855e-05	0	0	0.000130005	0	0	0	0	0	0	0	0	0	0.00280463
ASV_1302	d__Bacteria	p__Bacteroidota	c__Bacteroidia	o__Flavobacteriales	f__Weeksellaceae	g__Chryseobacterium		0	0.00401334	0	0	0	0	0	0	0	0	0	0	0	0	0	0	0	0	0	0	0	0	0	0	0	0	0	0	0	0
ASV_1303	d__Bacteria	p__Chloroflexi	c__Chloroflexia	o__Thermomicrobiales	f__JG30-KF-CM45	g__JG30-KF-CM45	s__uncultured_bacterium	6.0928e-05	0.00401334	0	0	0	0	6.0928e-05	0	0	0	0	0	0	0	0	0	0	0	0	0	0	0	0	0	0	0	0	0	0	0
ASV_1304	d__Archaea	p__Crenarchaeota	c__Bathyarchaeia	o__Bathyarchaeia	f__Bathyarchaeia	g__Bathyarchaeia	s__uncultured_archaeon	0.00742808	0.00401334	0	0	0	0	0	0	0	0	0	0	0	0	0	0	0	0	0	0.00742808	0	0	0	0	0	0	0	0	0	0
ASV_1305	d__Bacteria	p__Proteobacteria	c__Gammaproteobacteria	o__Burkholderiales	f__Rhodocyclaceae			0.00681221	0.00401334	0	0	0	0	0	0	0	0	0	0	0	0	0	0	0	0	0	0	0	0.00670432	0.000107894	0	0	0	0	0	0	0
ASV_1306	d__Archaea	p__Nanoarchaeota	c__Nanoarchaeia	o__Woesearchaeales	f__SCGC_AAA011-D5	g__SCGC_AAA011-D5		0.00252433	0.00427323	0	0	0	0	0	0	0	0	0	0	0	0	0	0	0	0	0	0	0	0.00252433	0	0	0	0	0	0	0	0
ASV_1307	d__Bacteria	p__Bacteroidota	c__Bacteroidia	o__Flavobacteriales	f__Weeksellaceae			0.00646437	0.00427323	0	0	0	0	0	2.70149e-05	0.00579748	0	5.98982e-05	0	0	0	4.05055e-05	0	0	0	0	0	0	0	0.000539471	0	0	0	0	0	0	0
ASV_1308	d__Bacteria	p__Chloroflexi	c__Dehalococcoidia	o__S085	f__S085	g__S085	s__metagenome	0.000630051	0.00427323	0	0	0	0	0	0	0	0	0	0	0	0	0	0	0	0	0	0	0.00022244	0	0	0.000337952	0	6.96592e-05	0	0	0	0
ASV_1309	d__Bacteria	p__Deinococcota	c__Deinococci	o__Thermales	f__Thermaceae	g__Thermus		0.00236481	0.00427323	0	0	8.01475e-05	0	0	0	0	0	0	0	0	0	0	0	0	0.00228466	0	0	0	0	0	0	0	0	0	0	0	0
ASV_1310	d__Bacteria	p__Armatimonadota	c__Armatimonadia	o__Armatimonadales	f__Armatimonadales	g__Armatimonadales	s__uncultured_bacterium	0.00297263	0.00427323	0	0	0	0	5.25984e-05	0	0	0	0	0	0	0	0	0	0	0	0	0	0	0	3.26286e-05	0	0.0028874	0	0	0	0	0
ASV_1311	d__Bacteria	p__Myxococcota	c__Polyangia	o__Polyangiales	f__Polyangiaceae	g__Pajaroellobacter		0.0024148	0.00427323	0	0	0	0	0	0	0	0	0	8.11491e-05	0	0	0	0	0	0.00221989	0	0.000113755	0	0	0	0	0	0	0	0	0	0
ASV_1312	d__Bacteria	p__Firmicutes	c__Bacilli	o__Staphylococcales	f__Staphylococcaceae	g__Staphylococcus		0	0.00427323	0	0	0	0	0	0	0	0	0	0	0	0	0	0	0	0	0	0	0	0	0	0	0	0	0	0	0	0
ASV_1313	d__Bacteria	p__Acidobacteriota	c__Holophagae	o__Subgroup_7	f__Subgroup_7	g__Subgroup_7	s__uncultured_bacterium	0.00302727	0.00427323	0	0	0	0	0	0	0	0	0	0	0	0	8.53752e-05	0.00276992	0.000171969	0	0	0	0	0	0	0	0	0	0	0	0	0
ASV_1314	d__Bacteria	p__Proteobacteria	c__Gammaproteobacteria	o__Pseudomonadales	f__Pseudomonadaceae	g__Pseudomonas		0.00281998	0.00427323	0	0	0	0	0	0	0	0	0	0	0	0	0	0	0	0	0	0	0	0	0	0	0	0	0	0	0	0.00281998
ASV_1315	d__Bacteria	p__Acidobacteriota	c__Acidobacteriae	o__Subgroup_2	f__Subgroup_2	g__Subgroup_2	s__uncultured_bacterium	0	0.00427323	0.00185583	0.00215751	0	0	0	0	0	0	0	0	0	0	0	0	0	0	0	0	0	0	0	0	0	0	0	0	0	0
ASV_1316	d__Bacteria	p__Proteobacteria	c__Alphaproteobacteria	o__Azospirillales	f__Azospirillaceae	g__Skermanella		0.00391029	0.000259891	0	0	0	0	0	2.25124e-05	0	0.000133615	0.00368374	0	0	0	0	0	0	0	0	0	0	0	0	0	0	0	0	7.04201e-05	0	0
ASV_1317	d__Bacteria	p__Chloroflexi	c__Dehalococcoidia	o__GIF9	f__AB-539-J10	g__AB-539-J10	s__uncultured_bacterium	0.00405226	0.000259891	0	0	0	0	0	0	0	0.00393538	0	0	0	0	0	0	0	0	0	0	0	0	0.000116885	0	0	0	0	0	0	0
ASV_1318	d__Bacteria	p__Proteobacteria	c__Gammaproteobacteria	o__Alteromonadales	f__Shewanellaceae	g__Shewanella		0	0.000259891	0	0	0	0	0	0	0	0	0	0	0	0	0	0	0	0	0	0	0	0	0	0	0	0	0	0	0	0
ASV_1320	d__Bacteria	p__Proteobacteria	c__Alphaproteobacteria	o__Reyranellales	f__Reyranellaceae	g__Reyranella		0.000287771	0.000259891	0	0	0	0	0	0	0	0	0	0	0	0	0	0	0	0	0	0.000150824	0	0	0	2.92082e-05	0.000107739	0	0	0	0	0
ASV_1321	d__Bacteria	p__Proteobacteria	c__Alphaproteobacteria	o__Rhizobiales	f__Xanthobacteraceae			0.00253734	0.000259891	0	0	0	0	0	0	0	0	0	0	0	0	0	0	0	0	0	0	0	0.00253734	0	0	0	0	0	0	0	0
ASV_1323	d__Bacteria	p__Proteobacteria	c__Gammaproteobacteria	o__Burkholderiales	f__Methylophilaceae			0.0114457	0.000259891	0	0	0	0	0	0	0	0	0	0	0	0	0	0	0	0	0	0	0	0	0	0	0	0	0	0	0.0114457	0
ASV_1324	d__Bacteria	p__Proteobacteria	c__Alphaproteobacteria	o__Sphingomonadales	f__Sphingomonadaceae	g__Sphingomonas		0.00305031	0.000259891	0	0	0	0	0	0	0	0	0	0	0	0	0	0	0	0	0	0	0.00305031	0	0	0	0	0	0	0	0	0
ASV_1325	d__Bacteria	p__Firmicutes	c__Bacilli	o__Thermoactinomycetales	f__Thermoactinomycetaceae			0.00162161	0.000259891	0	0	0	0	0	0	0	0	0	0	0	0	0	0	0	0.00140372	0	5.6559e-05	0.000133464	0	0	0	0	2.78637e-05	0	0	0	0
ASV_1326	d__Bacteria	p__Firmicutes	c__Bacilli	o__Lactobacillales	f__Carnobacteriaceae	g__Granulicatella		0.00217279	0.00377151	0	0.000259891	0	0	0	0	0	0	0	0	0	0	0	0	0	0.00217279	0	0	0	0	0	0	0	0	0	0	0	0
ASV_1327	d__Bacteria	p__Bacteroidota	c__Bacteroidia	o__Cytophagales	f__Spirosomaceae			0.00277755	0.00351162	0	0	0	0	0	0	0	0	0	0	0	0	0	0	0	0	0	4.8752e-05	0	0	0	0	0	0	0	0	3.83007e-05	0.00269049
ASV_1328	d__Bacteria	p__Patescibacteria	c__WWE3	o__WWE3	f__WWE3	g__WWE3		0.00295082	0.00351162	0	0	0	0	0	0	0	4.50789e-05	0	0	0	0	0	0	0	0	0	0	0	0	0	0	0.00288203	0	2.37188e-05	0	0	0
ASV_1330	d__Bacteria	p__Bacteroidota	c__Bacteroidia	o__Flavobacteriales	f__Weeksellaceae	g__Chryseobacterium		0.00516719	0.00351162	0	0	0	0	0	0	0	0	0	0	0	2.63382e-05	0	0	0	0	0	0	0	0	0	0	0	0.00514085	0	0	0	0
ASV_1331	d__Bacteria	p__Proteobacteria	c__Gammaproteobacteria	o__Burkholderiales	f__Comamonadaceae			0.00821737	0.00351162	0	0	0	0	0	0	0	0	0	0	0	0	0.00821737	0	0	0	0	0	0	0	0	0	0	0	0	0	0	0
ASV_1332	d__Bacteria	p__Bdellovibrionota	c__Bdellovibrionia	o__Bdellovibrionales	f__Bdellovibrionaceae	g__Bdellovibrio	s__uncultured_bacterium	2.94416e-05	0.00351162	0	0	0	0	0	0	0	0	0	0	0	0	0	0	0	2.94416e-05	0	0	0	0	0	0	0	0	0	0	0	0
ASV_1333	d__Bacteria	p__Actinobacteriota	c__Actinobacteria	o__Corynebacteriales	f__Corynebacteriaceae	g__Corynebacterium	s__uncultured_bacterium	0	0.00351162	0	0	0	0	0	0	0	0	0	0	0	0	0	0	0	0	0	0	0	0	0	0	0	0	0	0	0	0
ASV_1334	d__Bacteria	p__Actinobacteriota	c__Actinobacteria	o__Micrococcales	f__Micrococcaceae	g__Arthrobacter		0	0.00351162	0	0	0	0	0	0	0	0	0	0	0	0	0	0	0	0	0	0	0	0	0	0	0	0	0	0	0	0
ASV_1335	d__Bacteria	p__Proteobacteria	c__Gammaproteobacteria	o__Burkholderiales	f__Oxalobacteraceae	g__Undibacterium	s__uncultured_bacterium	0.00722069	0.00351162	0	0	0	0	0	0	0	0	0	0	0	0	0	0	0	0	0	0.00722069	0	0	0	0	0	0	0	0	0	0
ASV_1336	d__Bacteria	p__Patescibacteria	c__Parcubacteria					0.00298126	0.00351162	0	0	0	0	0	0	0	0	0	0	0	0	0	0	0	0	0	0	0	0	0	0	0.0023554	0	0	0	0	0.000625863
ASV_1338	d__Bacteria	p__Desulfobacterota	c__Desulfovibrionia	o__Desulfovibrionales	f__Desulfovibrionaceae	g__Desulfovibrio		0.00229587	0.00351162	0	0	0	0	0	1.80099e-05	0	0	0	6.08618e-05	0	0	0	0	0	0.00210213	4.98706e-05	6.50026e-05	0	0	0	0	0	0	0	0	0	0
ASV_1339	d__Bacteria	p__Firmicutes	c__Bacilli	o__Lactobacillales	f__Lactobacillaceae	g__Lactobacillus	s__uncultured_bacterium	0.00293982	0.00351162	0	0	0	0	0	0	0	0	0	0	0	2.99291e-05	0	0	0	4.71065e-05	0	0	0.00277516	0	0	8.76245e-05	0	0	0	0	0	0
ASV_1340	d__Bacteria	p__Planctomycetota	c__Phycisphaerae	o__Tepidisphaerales	f__CPla-3_termite_group	g__CPla-3_termite_group		0.00143355	0.00351162	0	0	0	0	0	0	0	0	0	0	0	0.00143355	0	0	0	0	0	0	0	0	0	0	0	0	0	0	0	0
ASV_1341	d__Bacteria	p__Bacteroidota	c__Bacteroidia	o__Cytophagales	f__Hymenobacteraceae			0.00184391	0.00397713	0	0	0	0	0	0	0	0	0	0	0	0	0	0	0	7.44679e-06	0.00175208	4.8752e-05	0	3.56341e-05	0	0	0	0	0	0	0	0
ASV_1342	d__Bacteria	p__Planctomycetota						0	0.00397713	0	0	0	0	0	0	0	0	0	0	0	0	0	0	0	0	0	0	0	0	0	0	0	0	0	0	0	0
ASV_1343	d__Bacteria	p__Patescibacteria	c__Parcubacteria	o__Parcubacteria	f__Parcubacteria	g__Parcubacteria	s__uncultured_bacterium	0.000107795	0.00397713	0	0	0	0	0	0	0	0	0	0	0	0	0	0	0	0	0	0	0	0	0	0	7.18262e-05	0	0	0	0	3.59692e-05
ASV_1344	d__Bacteria	p__Bdellovibrionota	c__Bdellovibrionia	o__Bdellovibrionales	f__Bdellovibrionaceae	g__Bdellovibrio		0.00274085	0.00397713	0	0	0	0	0	0	0	0	0	0	0	0	0	0	0	0	0	0	0	0	0	0	0	0	0	0	0	0.00274085
ASV_1345	d__Bacteria	p__Proteobacteria	c__Gammaproteobacteria	o__Burkholderiales	f__Comamonadaceae			0	0.00397713	0	0	0	0	0	0	0	0	0	0	0	0	0	0	0	0	0	0	0	0	0	0	0	0	0	0	0	0
ASV_1346	d__Bacteria	p__Desulfobacterota	c__Desulfobaccia	o__Desulfobaccales	f__Desulfobaccaceae	g__Desulfobacca	s__uncultured_bacterium	0	0.00397713	0.00197087	0.00154075	0	0	0	0	0	0	0	0	0	0	0	0	0	0	0	0	0	0	0	0	0	0	0	0	0	0
ASV_1347	d__Bacteria	p__Actinobacteriota	c__Actinobacteria	o__Corynebacteriales	f__Nocardiaceae	g__Nocardia	Ambiguous_taxa	6.57479e-05	0.00141466	0	0	0	0	6.57479e-05	0	0	0	0	0	0	0	0	0	0	0	0	0	0	0	0	0	0	0	0	0	0	0
ASV_1349	d__Bacteria	p__Patescibacteria	c__Parcubacteria	o__Parcubacteria	f__Parcubacteria	g__Parcubacteria	s__uncultured_bacterium	0.012569	0.00141466	0	0	0	0	0	0	0	0	0	0	0	0	0	0	0	0	0	0	0	0	0	0	0	0	0	0	0	0.012569
ASV_1350	d__Bacteria	p__Cyanobacteria	c__Cyanobacteriia	o__Cyanobacteriales	f__Chroococcidiopsaceae	g__uncultured		0.00986681	0.00141466	0	0	0	0.00976774	9.90667e-05	0	0	0	0	0	0	0	0	0	0	0	0	0	0	0	0	0	0	0	0	0	0	0
ASV_1351	d__Bacteria	p__Proteobacteria	c__Gammaproteobacteria	o__Pseudomonadales	f__Pseudomonadaceae	g__Pseudomonas		0	0.00141466	0	0	0	0	0	0	0	0	0	0	0	0	0	0	0	0	0	0	0	0	0	0	0	0	0	0	0	0
ASV_1352	d__Bacteria	p__Proteobacteria	c__Gammaproteobacteria	o__Diplorickettsiales	f__Diplorickettsiaceae	g__uncultured		0.00223123	0.00141466	0	0	0	0	0	0	0	0	0	0	0	3.99054e-05	0	0	0	0.00210802	0	4.8752e-05	0	0	0	0	0	3.4562e-05	0	0	0	0
ASV_1353	d__Bacteria	p__Bdellovibrionota	c__Oligoflexia	o__0319-6G20	f__0319-6G20	g__0319-6G20	s__uncultured_bacterium	0.0027467	0.00141466	0	0	0	0	0	0	0	0	0	0	0	0	0	0	0	0	0	0.000113755	0	0	0	0	0	0	0	0	0	0.00263294
ASV_1354	d__Bacteria	p__Proteobacteria	c__Gammaproteobacteria	o__Burkholderiales	f__Methylophilaceae			0.00710758	0.00141466	0	0	0	0	0	0	0	0	0	0	0	0	0	0	0	0	0	0.00710758	0	0	0	0	0	0	0	0	0	0
ASV_1355	d__Bacteria	p__Bdellovibrionota	c__Bdellovibrionia	o__Bdellovibrionales	f__Bdellovibrionaceae	g__Bdellovibrio	s__uncultured_bacterium	0.00525726	0.00141466	0	0	0	0	0	0	0	0	0	0	0	0	0	0	0	0	0	0	0	0	0	0	0.00525726	0	0	0	0	0
ASV_1356	d__Bacteria	p__Proteobacteria	c__Alphaproteobacteria	o__Rhodobacterales	f__Rhodobacteraceae	g__Paracoccus		0.00564989	0.00141466	0	0	0	0	0	0	0	0.00564989	0	0	0	0	0	0	0	0	0	0	0	0	0	0	0	0	0	0	0	0
ASV_1357	d__Bacteria	p__Actinobacteriota	c__Actinobacteria	o__Corynebacteriales	f__Corynebacteriaceae	g__Corynebacterium	s__uncultured_bacterium	0.00152328	0.00141466	0	0	0	0	0	0	0	0	0	0	0	0	0	0	0	4.09574e-05	0	0	0	0	0	0	0	0	0.00148232	0	0	0
ASV_1358	d__Bacteria	p__Verrucomicrobiota	c__Omnitrophia	o__Omnitrophales	f__Omnitrophales	g__Omnitrophales	s__uncultured_bacterium	0.00225605	0.00141466	0	0	6.01106e-05	0	0	0	0	0	0	0	0	0	0	0	0	0.00214923	1.4206e-05	3.25013e-05	0	0	0	0	0	0	0	0	0	0
ASV_1359	d__Bacteria	p__Proteobacteria	c__Gammaproteobacteria	o__Burkholderiales	f__Methylophilaceae			0.0037875	0.00141466	0	0	0	0	0	0	0	0	0	0	0	0	0	0	0	0	0.0037875	0	0	0	0	0	0	0	0	0	0	0
ASV_1361	d__Bacteria	p__Campilobacterota	c__Campylobacteria	o__Campylobacterales	f__Arcobacteraceae	g__Pseudarcobacter	s__uncultured_bacterium	0.000805202	0.00141466	0.000273681	0.000191834	0	0	0.000349846	0	0	0.000103563	7.72538e-05	0	3.22186e-05	0	0	7.25111e-05	0.000117841	0	0	0	0	0	0	0	0	0	2.13283e-05	0	3.06405e-05	0
ASV_1362	d__Bacteria	p__Proteobacteria	c__Gammaproteobacteria	o__Oceanospirillales	f__Saccharospirillaceae	g__Saccharospirillum		0.00264243	0.000949149	0	0	0	0	0	0	0	0	0	0	0	0	0	0	0	0	0	0	0	0	0	0	0	0	0	0	0.000117392	0.00252503
ASV_1363	d__Bacteria	p__Planctomycetota	c__Phycisphaerae	o__Phycisphaerales	f__Phycisphaeraceae	g__SM1A02	s__uncultured_bacterium	0.00346252	0.000949149	0	0	0	0	0	0	0	0.000138083	0	0	0	0	0	0	0	0	0	0	0	0	0.00328178	0	0	0	4.26567e-05	0	0	0
ASV_1364	d__Bacteria	p__Myxococcota	c__bacteriap25	o__bacteriap25	f__bacteriap25	g__bacteriap25	s__uncultured_bacterium	0.00175404	0.000949149	0	0	0	0	0	0	0	0	0	0	0	0	3.03791e-05	0	0	0	0.00172366	0	0	0	0	0	0	0	0	0	0	0
ASV_1365	d__Bacteria	p__Firmicutes	c__Bacilli	o__Bacillales	f__Bacillaceae	g__Bacillus		0.00293239	0.000949149	0	0	0	0	0	0	0	0	0	0	0	0	0	0	0	0	0	0	0.00293239	0	0	0	0	0	0	0	0	0
ASV_1366	d__Bacteria	p__Bacteroidota	c__Bacteroidia	o__Sphingobacteriales	f__env.OPS_17	g__env.OPS_17	s__uncultured_bacterium	0.0117198	0.000949149	0	0	0	0	0	0	0	0	1.3633e-05	0	0	0	0	0	0	0	0	0.000131971	0	0	0	0	0	0	0	0	0	0.0115742
ASV_1367	d__Bacteria	p__Bacteroidota	c__Bacteroidia	o__Bacteroidales	f__Bacteroidetes_vadinHA17	g__Bacteroidetes_vadinHA17	s__uncultured_bacterium	0.00112603	0.000949149	0.000725588	0.000223561	8.01475e-05	4.36478e-05	0.00061493	0	0	0.00012021	0	0	0	0	0	0	0	0	0	0	0	0	0	0	7.87439e-05	0	5.53438e-05	0	0	0.000133005
ASV_1368	d__Bacteria	p__Proteobacteria	c__Alphaproteobacteria	o__Rhizobiales	f__Beijerinckiaceae	g__Methylobacterium-Methylorubrum		0.0216882	0	0	0	0.0216882	0	0	0	0	0	0	0	0	0	0	0	0	0	0	0	0	0	0	0	0	0	0	0	0	0
ASV_1369	d__Bacteria	p__Patescibacteria	c__Berkelbacteria	o__Berkelbacteria	f__Berkelbacteria	g__Berkelbacteria	s__uncultured_bacterium	0.000940503	0	0	0	0	0	0	0.000173974	0	0	0	0.000277162	0	0	0	0	0	0	0	0	0.000489367	0	0	0	0	0	0	0	0	0
ASV_1370	d__Bacteria	p__Patescibacteria	c__Parcubacteria					0.00327238	0	0	0	0	0	5.55312e-06	0	0	0	0	0	0	0	0	1.17125e-05	0	0	0	0	0	0	0	0	4.2058e-05	0	0.00321306	0	0	0
ASV_1371	d__Bacteria	p__Acidobacteriota	c__AT-s3-28	o__AT-s3-28	f__AT-s3-28	g__AT-s3-28		0.00215282	0	0	0	0	0	0	0	0	0	0	0	0	0	0	0	0	0.00214335	9.47068e-06	0	0	0	0	0	0	0	0	0	0	0
ASV_1372	d__Bacteria	p__Bacteroidota	c__Bacteroidia	o__Bacteroidales	f__Prevotellaceae	g__Prevotella		0	0	0	0	0	0	0	0	0	0	0	0	0	0	0	0	0	0	0	0	0	0	0	0	0	0	0	0	0	0
ASV_1373	d__Bacteria	p__Proteobacteria	c__Gammaproteobacteria	o__Enterobacterales				0.0118375	0	0	0	0	0	0	0	0	0	0	0	0	0	0	0	0	0	0	0	0	0	0	0	0	0	0	0	0	0.0118375
ASV_1374	d__Bacteria	p__Bacteroidota	c__Bacteroidia	o__Chitinophagales	f__Chitinophagaceae	g__uncultured		0.000410717	0	0	0	0	0	0	0	0	0	0	0	0	0	0	5.85624e-05	0	3.53299e-05	2.36767e-05	0.000130005	0	0	0.000163143	0	0	0	0	0	0	0
ASV_1375	d__Bacteria	p__Proteobacteria	c__Alphaproteobacteria	o__Sphingomonadales	f__Sphingomonadaceae	g__Novosphingobium		0.00185172	0	0	0	0.0003517	0	0	0	0	0	0	0	0	0.00132443	8.53752e-05	0	9.02136e-05	0	0	0	0	0	0	0	0	0	0	0	0	0
ASV_1376	d__Bacteria	p__Proteobacteria	c__Gammaproteobacteria	o__Burkholderiales	f__Methylophilaceae			0.00676772	0	0	0	0	0	0	0	0.00676772	0	0	0	0	0	0	0	0	0	0	0	0	0	0	0	0	0	0	0	0	0
ASV_1377	d__Bacteria	p__Planctomycetota	c__Planctomycetes	o__Pirellulales	f__Pirellulaceae	g__Pirellula		0.00214924	0	0	0	0	0	0	0	0	0	0	0	0	0	0	0.00214924	0	0	0	0	0	0	0	0	0	0	0	0	0	0
ASV_1378	d__Bacteria	p__Patescibacteria	c__ABY1	o__Candidatus_Magasanikbacteria	f__Candidatus_Magasanikbacteria	g__Candidatus_Magasanikbacteria	s__uncultured_bacterium	0.00299958	0	0	0	0	0	0	0	0	0	0	0	0	0	0	1.75687e-05	0	0	0	0	0	0	0	0	0.000527584	1.7281e-05	0.00243715	0	0	0
ASV_1379	d__Bacteria	p__Bacteroidota	c__Bacteroidia	o__Bacteroidales	f__Prolixibacteraceae	g__BSV13	s__uncultured_bacterium	0.00963433	0.00400423	0	0	0	0	0	0	0	0	0	0	0	0	0	2.3425e-05	0	0	0	0	0	0	9.78857e-05	0	6.29951e-05	0	0	0	0.00945002	0
ASV_1380	d__Archaea	p__Nanoarchaeota	c__Nanoarchaeia	o__Woesearchaeales	f__Woesearchaeales	g__Woesearchaeales		0.00214274	0.00700617	0	0	0	0	0	0	0	0	0	0	0	0	0	0	0	0.00214274	0	0	0	0	0	0	0	0	0	0	0	0
ASV_1381	d__Bacteria	p__Proteobacteria	c__Gammaproteobacteria	o__Burkholderiales	f__Comamonadaceae			0	0.00700617	0	0	0	0	0	0	0	0	0	0	0	0	0	0	0	0	0	0	0	0	0	0	0	0	0	0	0	0
ASV_1382	d__Bacteria	p__Proteobacteria	c__Gammaproteobacteria	o__Burkholderiales	f__Oxalobacteraceae			0.00101622	0.00700617	0	0	0	0	0.00101622	0	0	0	0	0	0	0	0	0	0	0	0	0	0	0	0	0	0	0	0	0	0	0
ASV_1383	d__Bacteria	p__Firmicutes	c__uncultured	o__uncultured	f__uncultured	g__uncultured	s__uncultured_bacterium	0.00263558	0.00700617	0	0	0	0	1.11062e-05	0	0	0	0	0	0	0	0	0.00260315	0	0	0	0	0	0	0	0	0	0	2.13283e-05	0	0	0
ASV_1384	d__Bacteria	p__Bacteroidota	c__Bacteroidia	o__Cytophagales	f__Spirosomaceae	g__Pseudarcicella		0.0101587	0.00700617	0	0	0	0	0.000131496	0	0	0	0	0	0	0	0	0	0	0	0	0	0	0	0	0	8.66183e-05	0	0	0	0.00989024	5.03568e-05
ASV_1385	d__Bacteria	p__Actinobacteriota	c__Actinobacteria	o__Pseudonocardiales	f__Pseudonocardiaceae	g__Actinomycetospora		0.00987628	0.00700617	0	0	0	0.00987628	0	0	0	0	0	0	0	0	0	0	0	0	0	0	0	0	0	0	0	0	0	0	0	0
ASV_1386	d__Bacteria	p__Patescibacteria	c__Parcubacteria					0.00135532	0.00700617	0	0	0	0	0	0	0	0	0	0	0	0	0	0	0	0.00135532	0	0	0	0	0	0	0	0	0	0	0	0
ASV_1387	d__Bacteria	p__Proteobacteria	c__Alphaproteobacteria	o__Sphingomonadales	f__Sphingomonadaceae	g__Sphingomonas		0.0014653	0.00700617	0	0	0	0	0	0	0	0	0	0	0	0	0	0	0	0.00128085	7.06999e-05	0.000113755	0	0	0	0	0	0	0	0	0	0
ASV_1388	d__Bacteria	p__Acidobacteriota	c__Acidobacteriae	o__Acidobacteriales	f__Acidobacteriaceae_(Subgroup_1)	g__Granulicella		0.0119354	0.00700617	0	0	0	0	0	0	0	0	0	0	0	0	0	0	0	0	0	0	0	0	0	0	0	0	0	0.000458631	3.83007e-05	0.0114385
ASV_1389	d__Bacteria	p__Patescibacteria	c__Parcubacteria	o__Candidatus_Jorgensenbacteria	f__Candidatus_Jorgensenbacteria	g__Candidatus_Jorgensenbacteria		0.00673453	0.00700617	0	0	0	0	0	0	0	0	0	0	0	0	0	0	0	0	0	0	0	0	0	0	0	0	0	0	0.00672014	1.43877e-05
ASV_1390	d__Bacteria	p__Proteobacteria	c__Gammaproteobacteria	o__Burkholderiales	f__Oxalobacteraceae	g__Massilia	s__uncultured_bacterium	0.00213746	0.00700617	0	0	0	0	0	0	0	0	0	0	0	0	0	0	0	0.00213746	0	0	0	0	0	0	0	0	0	0	0	0
ASV_1391	d__Bacteria	p__Bacteroidota	c__Bacteroidia	o__Cytophagales	f__Hymenobacteraceae	g__Hymenobacter		0.00982083	0.0105232	0	0	0	0	0	0	0.0097948	0	0	0	0	0	0	0	0	0	0	0	0	2.6024e-05	0	0	0	0	0	0	0	0
ASV_1392	d__Bacteria	p__Bacteroidota	c__Bacteroidia	o__Cytophagales	f__Spirosomaceae	g__Runella		0.00491622	0.0105232	0	0	0	0	0	0	0	0	0	0	0	0	0	1.45022e-05	0	0	0	0	0	0	0	0	0.00487873	0	0	0	2.29804e-05	0
ASV_1393	d__Bacteria	p__Patescibacteria	c__Parcubacteria	o__Candidatus_Azambacteria	f__Candidatus_Azambacteria	g__Candidatus_Azambacteria		0.000218217	0.0105232	0	0	0	0	0	0	0	0	0	0	0	0	0	0	0	0	3.91413e-05	9.75039e-05	0	0	8.15714e-05	0	0	0	0	0	0	0
ASV_1394	d__Bacteria	p__Fusobacteriota	c__Fusobacteriia	o__Fusobacteriales	f__Fusobacteriaceae	g__Fusobacterium	s__uncultured_bacterium	0.00281353	0.0105232	0	0	0	0	0	0	0	0.000105184	0	0	0	0	0	0	0	0	0	0	0	0	0	0	0	5.1843e-05	0.0026565	0	0	0
ASV_1395	d__Bacteria	p__Bacteroidota	c__Bacteroidia	o__Cytophagales	f__Microscillaceae	g__uncultured	s__uncultured_bacterium	0.00311922	0.0105232	0	0	0	0	0	0	0	0	0	0	0	0	0	0	0	0	0	0	0	0	0	0	0	0.00311922	0	0	0	0
ASV_1396	Unassigned							0	0.0105232	0	0	0	0	0	0	0	0	0	0	0	0	0	0	0	0	0	0	0	0	0	0	0	0	0	0	0	0
ASV_1397	d__Bacteria	p__Patescibacteria	c__Parcubacteria	o__Candidatus_Kaiserbacteria	f__Candidatus_Kaiserbacteria	g__Candidatus_Kaiserbacteria		0	0.0105232	0.00085585	0.00314838	0	0	0	0	0	0	0	0	0	0	0	0	0	0	0	0	0	0	0	0	0	0	0	0	0	0
ASV_1398	d__Bacteria	p__Caldisericota	c__Caldisericia	o__Caldisericales	f__Caldisericaceae	g__Caldisericum	s__uncultured_bacterium	0	0.00651902	0.00241115	0.00059079	0	0	0	0	0	0	0	0	0	0	0	0	0	0	0	0	0	0	0	0	0	0	0	0	0	0
ASV_1399	d__Bacteria	p__Elusimicrobiota	c__Elusimicrobia	o__Lineage_IV	f__Lineage_IV	g__Lineage_IV	s__uncultured_bacterium	0.00131436	0.00597196	0	0	0	0	0	0	0	0	0	0	0	0	0	0	0	0.00131436	0	0	0	0	0	0	0	0	0	0	0	0
ASV_1400	d__Bacteria	p__Proteobacteria	c__Alphaproteobacteria	o__Rhizobiales	f__Beijerinckiaceae	g__Bosea		0.000156828	0.00597196	0	0	0	0	0	0	0	0	0	0	0	0	0	0	0	0	0	3.7706e-05	0	0	0	8.76245e-05	3.14976e-05	0	0	0	0	0
ASV_1401	d__Bacteria	p__Cyanobacteria	c__Cyanobacteriia	o__Cyanobacteriales	f__Xenococcaceae	g__Pleurocapsa_PCC-7319		0.00170517	0.00597196	0	0	0.00017585	0	0	0	0	0	0	0.000237567	0	7.52519e-06	0	0	0	0.00123617	2.02e-05	0	0	0	0	0	0	2.78637e-05	0	0	0	0
ASV_1402	d__Bacteria	p__Proteobacteria	c__Alphaproteobacteria	o__Sphingomonadales	f__Sphingomonadaceae	g__Sphingomonas		0.00133298	0.00597196	0	0	0	0	0	0	0	0	0	0	0	0	0	0	0	0.00133298	0	0	0	0	0	0	0	0	0	0	0	0
ASV_1403	d__Bacteria	p__Bacteroidota	c__Bacteroidia	o__Bacteroidales	f__Prevotellaceae	g__Prevotella		0.00209456	0.00597196	0	0	0	0	0	0	0	0	0	0	0	7.52519e-06	0	0.00205554	0	0	0	0	0	0	0	0	3.14976e-05	0	0	0	0	0
ASV_1404	d__Bacteria	p__Proteobacteria	c__Gammaproteobacteria	o__Burkholderiales	f__Gallionellaceae	g__Gallionella		0.00209068	0.00597196	0	0	0	0	0	0	0	0	0	0	0	0	0	0.00209068	0	0	0	0	0	0	0	0	0	0	0	0	0	0
ASV_1405	d__Bacteria	p__Actinobacteriota	c__Actinobacteria	o__Propionibacteriales	f__Propionibacteriaceae	g__Cutibacterium		0.00521366	0.00597196	0	0	0	0	0	0	0	0	0	0	0	0	0	0	0	0	0	0	0	0	0	0.00521366	0	0	0	0	0	0
ASV_1406	d__Bacteria	p__Proteobacteria	c__Alphaproteobacteria	o__Caulobacterales	f__Caulobacteraceae	g__Caulobacter		0.00519905	0.00597196	0	0	0	0	0	0	0	0	0	0	0	0	0	0	0	0	0	0	0	0	0	0.00519905	0	0	0	0	0	0
ASV_1408	Unassigned							0.00279022	0.00597196	0	0	0	0	0	0	0	0	0	0	0	0	0	0	0	0	0	0	0	0	0	0	0.00279022	0	0	0	0	0
ASV_1409	d__Bacteria	p__Proteobacteria	c__Gammaproteobacteria	o__Enterobacterales	f__Enterobacteriaceae			0.00272052	0.00597196	0	0	0	0	0	0	0	0	0	0	0	0	0	0	0	0	0	0	0	0	0	0	0	0.000111455	0.00260907	0	0	0
ASV_1410	d__Bacteria	p__Acidobacteriota	c__Acidobacteriae	o__Solibacterales	f__Solibacteraceae	g__Candidatus_Solibacter	s__uncultured_bacterium	0	0.00611343	0.00163046	0.00188661	0	0	0	0	0	0	0	0	0	0	0	0	0	0	0	0	0	0	0	0	0	0	0	0	0	0
ASV_1411	d__Bacteria	p__Patescibacteria	c__Gracilibacteria	o__Gracilibacteria	f__Gracilibacteria	g__Gracilibacteria	s__uncultured_bacterium	0.000113755	0.00259635	0	0	0	0	0	0	0	0	0	0	0	0	0	0	0	0	0	0.000113755	0	0	0	0	0	0	0	0	0	0
ASV_1412	d__Bacteria	p__Firmicutes	c__Bacilli	o__Staphylococcales	f__Staphylococcaceae	g__Staphylococcus		0.00166684	0.00259635	0	0	0	0	0	0	0	0	0	0	0	0	0	0	0	0	0.00166684	0	0	0	0	0	0	0	0	0	0	0
ASV_1413	d__Bacteria	p__Proteobacteria	c__Gammaproteobacteria	o__Burkholderiales	f__Comamonadaceae			0	0.00259635	0	0	0	0	0	0	0	0	0	0	0	0	0	0	0	0	0	0	0	0	0	0	0	0	0	0	0	0
ASV_1414	d__Bacteria	p__Actinobacteriota	c__Actinobacteria	o__Micrococcales	f__Microbacteriaceae	g__Microbacterium	s__Microbacterium_sp.	0	0.00259635	0	0	0	0	0	0	0	0	0	0	0	0	0	0	0	0	0	0	0	0	0	0	0	0	0	0	0	0
ASV_1415	d__Bacteria	p__Firmicutes	c__Clostridia	o__Peptostreptococcales-Tissierellales	f__Peptostreptococcales-Tissierellales	g__Peptoniphilus	s__uncultured_bacterium	0.00059154	0.00259635	0	0	0	0	0	8.69868e-05	0	0	0	0.000118784	0	7.52519e-06	0	0	0	2.23404e-05	0	0	0.000355904	0	0	0	0	0	0	0	0	0
ASV_1416	d__Bacteria	p__Proteobacteria	c__Gammaproteobacteria	o__Burkholderiales	f__Comamonadaceae			0.0146113	0.00259635	0	0	0	0	0	0.0140919	0	0.000379729	0.000139762	0	0	0	0	0	0	0	0	0	0	0	0	0	0	0	0	0	0	0
ASV_1417	d__Bacteria	p__Patescibacteria	c__Saccharimonadia	o__Saccharimonadales	f__Saccharimonadales	g__Saccharimonadales		0.00234153	0.00259635	0	0	0	0	0	0	0	0	0	0	8.05464e-05	0	0	0	0	0	0	0	0	0.00221204	4.89428e-05	0	0	0	0	0	0	0
ASV_1419	d__Bacteria	p__Proteobacteria	c__Alphaproteobacteria	o__Caulobacterales	f__Caulobacteraceae	g__Brevundimonas		0	0.00259635	0.00150704	0.000947838	0	0	0	0	0	0	0	0	0	0	0	0	0	0	0	0	0	0	0	0	0	0	0	0	0	0
ASV_1420	d__Bacteria	p__Proteobacteria	c__Gammaproteobacteria	o__Burkholderiales	f__Oxalobacteraceae	g__Undibacterium	s__uncultured_bacterium	0.0017309	0.000141472	0	0	0	0	0	0	0	0	0	0	0	0.0017309	0	0	0	0	0	0	0	0	0	0	0	0	0	0	0	0
ASV_1421	d__Bacteria	p__Chloroflexi	c__Chloroflexia	o__Thermomicrobiales	f__JG30-KF-CM45	g__JG30-KF-CM45		0.0114358	0.000141472	0	0	0	0	0	0	0	0	0	0	0	0	0	0	0	0	0	0	0	0	0	0	0	0	0	0	3.06405e-05	0.0114052
ASV_1422	d__Bacteria	p__Bacteroidota	c__Bacteroidia	o__Flavobacteriales	f__Weeksellaceae	g__Chryseobacterium		0.000397184	0.000141472	0	0	0	0	0	0	0	0	0	0	0	0	0	0	7.21709e-05	0	0	0.000325013	0	0	0	0	0	0	0	0	0	0
ASV_1423	d__Bacteria	p__Proteobacteria	c__Gammaproteobacteria	o__Burkholderiales	f__Comamonadaceae	Ambiguous_taxa	Ambiguous_taxa	0.00272013	0.000141472	0	0	0	0	0	0	0	0	0	0	0	0	0	0	0	0	0	0	0.00272013	0	0	0	0	0	0	0	0	0
ASV_1424	d__Bacteria	p__Proteobacteria	c__Gammaproteobacteria	o__Burkholderiales	f__Methylophilaceae			0.00225108	0.000263774	0	0	0	0	0	0	0	0	0	0	0	0	0	0	0	0	0	0	0	0.00225108	0	0	0	0	0	0	0	0
ASV_1425	d__Bacteria	p__Proteobacteria	c__Alphaproteobacteria	o__Rickettsiales	f__Rickettsiaceae			0.00292734	0.000263774	0	0	0.00017585	0.000160042	0	0.000652401	0	0	0	0	0	0	0	0	0	2.60638e-05	0	0	0.00191298	0	0	0	0	0	0	0	0	0
ASV_1426	d__Bacteria	p__Actinobacteriota	c__Actinobacteria	o__Propionibacteriales	f__Propionibacteriaceae	g__uncultured		0.00176503	0.000263774	0	0	0	0	0	0	0	0	0	0	0	0.0014765	0	0	0	0.000288527	0	0	0	0	0	0	0	0	0	0	0	0
ASV_1428	d__Bacteria	p__Proteobacteria	c__Alphaproteobacteria	o__Sphingomonadales	f__Sphingomonadaceae			0	0.000263774	0	0	0	0	0	0	0	0	0	0	0	0	0	0	0	0	0	0	0	0	0	0	0	0	0	0	0	0
ASV_1429	d__Bacteria	p__Proteobacteria	c__Gammaproteobacteria	o__Burkholderiales	f__Methylophilaceae			0	0.000263774	0	0	0	0	0	0	0	0	0	0	0	0	0	0	0	0	0	0	0	0	0	0	0	0	0	0	0	0
ASV_1430	d__Bacteria	p__Bacteroidota	c__Bacteroidia	o__Chitinophagales	f__Chitinophagaceae	g__Sediminibacterium		0.00282619	0.00371021	0.000141472	0	0	0	0	0	0	0.000172604	0	0	0	0	0	2.17533e-05	0	0	0	0	0	0.000160353	0	0	0.000112155	0	0	0	0.00235932	0
ASV_1431	d__Bacteria	p__Chloroflexi	c__AD3	o__AD3	f__AD3	g__AD3	s__uncultured_bacterium	0.00163176	0.00356874	0	0	0	0	0.000194359	0.000297163	0	0	0	0	0	0.000729943	0	0	7.85608e-05	0	0	5.6559e-05	0	0	0	0	0	0	0	0.000275179	0	0
ASV_1432	d__Bacteria	p__Firmicutes	c__Bacilli	o__Erysipelotrichales	f__Erysipelotrichaceae	g__Erysipelothrix	s__uncultured_bacterium	0.00202662	0.00356874	0	0	0	0	0	9.00495e-06	0	0	0	0	0	0	0	0	0	0.00194314	9.47068e-06	6.50026e-05	0	0	0	0	0	0	0	0	0	0
ASV_1433	d__Bacteria	p__Actinobacteriota	c__Actinobacteria	o__Micrococcales	f__Intrasporangiaceae			0	0.00356874	0	0	0	0	0	0	0	0	0	0	0	0	0	0	0	0	0	0	0	0	0	0	0	0	0	0	0	0
ASV_1434	d__Bacteria	p__Actinobacteriota	c__Actinobacteria	o__Corynebacteriales	f__Corynebacteriaceae	g__Corynebacterium		0.00162896	0.00356874	0	0	0	0	0	0	0	0	0	0	0	0	0	0	0	0	0.00162896	0	0	0	0	0	0	0	0	0	0	0
ASV_1435	d__Bacteria	p__Verrucomicrobiota	c__Verrucomicrobiae	o__Chthoniobacterales	f__Chthoniobacteraceae	g__Chthoniobacter		0.0310218	0.00356874	0	0	0	0	0	0	0	0	0	0	0	0	0	0	0	0	0	9.42649e-05	0	0	0	0	0	0	1.58125e-05	0.0309118	0	0
ASV_1436	d__Bacteria	p__Patescibacteria	c__Parcubacteria	o__Candidatus_Azambacteria	f__Candidatus_Azambacteria	g__Candidatus_Azambacteria		0	0.00356874	0	0	0	0	0	0	0	0	0	0	0	0	0	0	0	0	0	0	0	0	0	0	0	0	0	0	0	0
ASV_1437	d__Bacteria	p__Acidobacteriota	c__Acidobacteriae	o__Acidobacteriales	f__Koribacteraceae	g__Candidatus_Koribacter	s__uncultured_bacterium	0.000910287	0.00356874	0	0	0	7.27463e-05	0.000683034	0	0	0	0.000154508	0	0	0	0	0	0	0	0	0	0	0	0	0	0	0	0	0	0	0
ASV_1438	d__Bacteria	p__Proteobacteria	c__Gammaproteobacteria	o__Burkholderiales	f__Alcaligenaceae	g__Oligella	s__uncultured_bacterium	0.00128512	0.00356874	0	0	0	0	0	0	0	0	0.00022961	0	0	0	0	0	0.00039694	0	0	0.000536271	0	0	0	0	0	0	0	0	0	0.000122295
ASV_1439	d__Bacteria	p__Actinobacteriota	c__Actinobacteria	o__Micrococcales	f__Micrococcaceae	g__Rothia		0.00161139	0.00356874	0	0	0	0	0	0	0	0	0	0	0	0	0	0	0	2.97872e-05	0.0015816	0	0	0	0	0	0	0	0	0	0	0
ASV_1440	d__Bacteria	p__Firmicutes	c__Clostridia	o__Peptostreptococcales-Tissierellales	f__Peptostreptococcales-Tissierellales	g__Peptoniphilus	s__uncultured_bacterium	0.00160528	0.00356874	0	0	0	0	0	0	0	0	0	0	0	0	0	0	0	0	0.00160528	0	0	0	0	0	0	0	0	0	0	0
ASV_1441	d__Bacteria	p__Proteobacteria	c__Alphaproteobacteria	o__Rhizobiales	f__Xanthobacteraceae			0	0.00356874	0	0	0	0	0	0	0	0	0	0	0	0	0	0	0	0	0	0	0	0	0	0	0	0	0	0	0	0
ASV_1442	d__Archaea	p__Crenarchaeota	c__Nitrososphaeria	o__Nitrosotaleales	f__Nitrosotaleaceae	g__Nitrosotaleaceae	s__uncultured_archaeon	0.00295505	0.00356874	0	0	0	0	0	0	0	0	0	0	0	0	0	0	0	0	0	0	0	0	0	0	0	0.00295505	0	0	0	0
ASV_1443	d__Bacteria	p__Firmicutes	c__Clostridia	o__Peptostreptococcales-Tissierellales	f__Peptostreptococcales-Tissierellales	g__Anaerococcus	s__uncultured_bacterium	0	0.00356874	0	0.000122302	0	0	0	0	0	0	0	0	0	0	0	0	0	0	0	0	0	0	0	0	0	0	0	0	0	0
ASV_1444	d__Bacteria	p__Bacteroidota	c__Bacteroidia	o__Flavobacteriales	f__Flavobacteriaceae	g__Vitellibacter		0.00169601	0.00344644	0	0	4.00737e-05	0	0	0.000378208	0	0	0	0	0	0.00126201	0	0	0	0	0	0	1.57233e-05	0	0	0	0	0	0	0	0	0
ASV_1445	d__Archaea	p__Halobacterota	c__Methanomicrobia	o__Methanomicrobiales	f__Rice_Cluster_II	g__Rice_Cluster_II	s__uncultured_archaeon	0.00296673	0.00344644	0	0	0	0.000145493	0	0	0	0	0	0	0	0	0.000554939	0	0	0	0	0	0.00163522	0.000631083	0	0	0	0	0	0	0	0
ASV_1447	d__Bacteria	p__Dependentiae	c__Babeliae	o__Babeliales	f__UBA12409	g__UBA12409	s__uncultured_bacterium	0.00167351	0.00344644	0	0	0	5.42652e-05	0	0	5.5322e-05	0	0	0	0	0	0	0	0	0	0.00156392	0	0	0	0	0	0	0	0	0	0	0
ASV_1448	d__Bacteria	p__Bdellovibrionota	c__Oligoflexia	o__0319-6G20	f__0319-6G20	g__0319-6G20	s__uncultured_bacterium	0.0060578	0.00344644	0	0	0	0	0	0	0	0	0	0	0	0	0	0	0	0	0	0	0	0.0060578	0	0	0	0	0	0	0	0
ASV_1449	d__Bacteria	p__Firmicutes	c__Clostridia	o__Clostridiales	f__Clostridiaceae			0	0.00344644	0.00154108	0.00190535	0	0	0	0	0	0	0	0	0	0	0	0	0	0	0	0	0	0	0	0	0	0	0	0	0	0
ASV_1450	d__Bacteria	p__Gemmatimonadota	c__Longimicrobia	o__Longimicrobiales	f__Longimicrobiaceae	g__YC-ZSS-LKJ147	s__uncultured_bacterium	0.00621631	0	0	0	0	0	0	0	0.00595633	0.000232709	2.7266e-05	0	0	0	0	0	0	0	0	0	0	0	0	0	0	0	0	0	0	0
ASV_1451	d__Bacteria	p__Proteobacteria	c__Alphaproteobacteria	o__Caulobacterales	f__Caulobacteraceae	g__Asticcacaulis		0.00284643	0	0	0	0	0	0	0	0	7.51315e-05	0	0	0	0	0	0	0	0	0	0	0	0	0	0.000160645	0.00246391	0	0	0	0.000146739	0
ASV_1452	d__Bacteria	p__Proteobacteria	c__Gammaproteobacteria	o__Pseudomonadales	f__Pseudomonadaceae	g__Pseudomonas		0	0	0	0	0	0	0	0	0	0	0	0	0	0	0	0	0	0	0	0	0	0	0	0	0	0	0	0	0	0
ASV_1453	d__Bacteria	p__Proteobacteria	c__Alphaproteobacteria					0.0107248	0	0	0	0	0	0	0	0	0	0	0	0	0	0	0	0.000235682	0	0	0	0	0	0	0	0	0	0	0	0.000126344	0.0103627
ASV_1454	d__Archaea	p__Crenarchaeota	c__Nitrososphaeria	o__Nitrososphaerales	f__Nitrososphaeraceae			0.00219903	0	0	0	0	0	0	0	0	0	0	0	0	0	0	0	0	0	0	0	0	0.00219903	0	0	0	0	0	0	0	0
ASV_1455	d__Bacteria	p__Verrucomicrobiota	c__Verrucomicrobiae	o__Opitutales	f__Opitutaceae	g__Opitutus		0.00015012	0	0	0	0	0	0	1.80099e-05	0	0	0	0	0	0	0	0	0	2.35532e-05	0	0	0	0	0	4.38122e-05	0	0	0	0	0	6.47445e-05
ASV_1456	d__Bacteria	p__Patescibacteria	c__Parcubacteria	o__Candidatus_Azambacteria	f__Candidatus_Azambacteria	g__Candidatus_Azambacteria		0.00137409	0	0	0	0	0	0	0.00013048	0	0	0	0	0	0	0	0	0	0.00124361	0	0	0	0	0	0	0	0	0	0	0	0
ASV_1457	d__Bacteria	p__SAR324_clade(Marine_group_B)	c__SAR324_clade(Marine_group_B)	o__SAR324_clade(Marine_group_B)	f__SAR324_clade(Marine_group_B)	g__SAR324_clade(Marine_group_B)		0.00267315	0	0	0	0	0	0	0	0	4.50789e-05	0	0	0	0	0	1.75687e-05	0	0	0	0	0	0	0	0	3.14976e-05	0	0.00254379	3.521e-05	0	0
ASV_1458	d__Bacteria	p__Proteobacteria	c__Gammaproteobacteria	o__Pseudomonadales	f__Pseudomonadaceae	g__Pseudomonas		0.00393258	0	0	0	0	0	0	0	0	0	0	0	0	0	0	0	0	0.00104223	0	0.00289035	0	0	0	0	0	0	0	0	0	0
ASV_1459	d__Bacteria	p__Proteobacteria	c__Gammaproteobacteria	o__Burkholderiales	f__Burkholderiaceae	g__Ralstonia		0.00202289	0	0	0	0	0	0	0	0	0	0	0	0	0	0	0	0	0.00190192	0	0	0	0	0	0	0	0.000120967	0	0	0	0
ASV_1460	d__Bacteria	p__Proteobacteria	c__Gammaproteobacteria	o__Burkholderiales	f__Comamonadaceae			0	0	0	0	0	0	0	0	0	0	0	0	0	0	0	0	0	0	0	0	0	0	0	0	0	0	0	0	0	0
ASV_1461	d__Bacteria	p__Proteobacteria	c__Gammaproteobacteria	o__Burkholderiales	f__Comamonadaceae	g__Aquabacterium		0	0	0	0	0	0	0	0	0	0	0	0	0	0	0	0	0	0	0	0	0	0	0	0	0	0	0	0	0	0
ASV_1462	d__Bacteria	p__Proteobacteria	c__Alphaproteobacteria	o__Rhizobiales	f__Beijerinckiaceae	g__uncultured		0.00638662	0.00282639	0	0	0	0	0	0.000217467	0.00606396	0.000105184	0	0	0	0	0	0	0	0	0	0	0	0	0	0	0	0	0	0	0	0
ASV_1463	d__Bacteria	p__Firmicutes	c__Clostridia	o__Oscillospirales	f__Ruminococcaceae	g__Faecalibacterium	s__uncultured_bacterium	0.00203232	0.00282639	0	0	0	0	0	0	0	0	0	0	0	1.99527e-05	0	0	0	0.00140731	0	0	0	0.000605059	0	0	0	0	0	0	0	0
ASV_1464	d__Bacteria	p__Bacteroidota	c__Bacteroidia	o__Flavobacteriales	f__Flavobacteriaceae	g__Flavobacterium		0.00159974	0.00282639	0	0	0	0	0	0	0	0	0	0	0	0	6.07583e-05	0	0	0	0.00153899	0	0	0	0	0	0	0	0	0	0	0
ASV_1465	d__Bacteria	p__Proteobacteria	c__Gammaproteobacteria	o__Burkholderiales	f__Comamonadaceae			0.00218602	0.00282639	0	0	0	0	0	0	0	0	0	0	0	0	0	0	0	0	0	0	0	0.00218602	0	0	0	0	0	0	0	0
ASV_1466	d__Bacteria	p__Verrucomicrobiota	c__Verrucomicrobiae	o__Chthoniobacterales	f__Chthoniobacteraceae	g__Chthoniobacter		0.000337952	0.00282639	0	0	0	0	0	0	0	0	0	0	0	0	0	0	0	0	0	0	0	0	0	0.000337952	0	0	0	0	0	0
ASV_1467	d__Bacteria	p__Proteobacteria	c__Gammaproteobacteria	o__Pseudomonadales	f__Moraxellaceae	g__Acinetobacter		0.0026565	0.00282639	0	0	0	0	0	0	0	0	0	0	0	0	0	0	0	0	0	0	0	0	0	0	0	0	0.0026565	0	0	0
ASV_1468	d__Bacteria	p__Planctomycetota	c__Planctomycetes	o__Planctomycetales	f__Rubinisphaeraceae	g__SH-PL14	s__uncultured_bacterium	0.00202672	0.00282639	0	0	0	0	0	0	0	0	0	8.11491e-05	0	0	0	0	0	0.00193137	1.4206e-05	0	0	0	0	0	0	0	0	0	0	0
ASV_1469	d__Bacteria	p__Actinobacteriota	c__Actinobacteria	o__Propionibacteriales	f__Nocardioidaceae	g__Nocardioides		0.00304157	0.00282639	0	0	0	0	0	0	0	0	0	0	0	0	0	0	0	0	0	0	0	0	0	0.00304157	0	0	0	0	0	0
ASV_1470	d__Bacteria	p__Actinobacteriota	c__Actinobacteria	o__Micrococcales	f__Intrasporangiaceae			0.000217061	0.00282639	0	0	0	0.000217061	0	0	0	0	0	0	0	0	0	0	0	0	0	0	0	0	0	0	0	0	0	0	0	0
ASV_1471	d__Bacteria	p__Proteobacteria	c__Gammaproteobacteria	o__Burkholderiales	f__Comamonadaceae	g__Aquabacterium		0.00333433	0.00282639	0	0	0	0	0	0	0	0	0.00333433	0	0	0	0	0	0	0	0	0	0	0	0	0	0	0	0	0	0	0
ASV_1472	d__Bacteria	p__Chloroflexi	c__Dehalococcoidia					0.000133033	0.00282639	0	0	0	0	0	0	0	0	0	6.08618e-05	0	0	0	0	7.21709e-05	0	0	0	0	0	0	0	0	0	0	0	0	0
ASV_1473	d__Bacteria	p__Actinobacteriota	c__Actinobacteria	o__Micrococcales	f__Intrasporangiaceae			0	0.00282639	0	0	0	0	0	0	0	0	0	0	0	0	0	0	0	0	0	0	0	0	0	0	0	0	0	0	0	0
ASV_1474	d__Bacteria	p__Cyanobacteria	c__Cyanobacteriia	o__Oxyphotobacteria_Incertae_Sedis	f__Unknown_Family	g__Leptolyngbya_ANT.L52.2		0.00122777	0.00282639	0	0	0	0	0	0	0	0	0	0	0	0	0	0	0	0.00122777	0	0	0	0	0	0	0	0	0	0	0	0
ASV_1475	d__Bacteria	p__Firmicutes	c__Bacilli	o__Staphylococcales	f__Staphylococcaceae	g__Staphylococcus		0.0019667	0.00282639	0	0	0	0	0	0	0	0	0	0	0	0	0	0	0	0.0019667	0	0	0	0	0	0	0	0	0	0	0	0
ASV_1476	d__Bacteria	p__Firmicutes	c__Clostridia	o__Peptostreptococcales-Tissierellales	f__Peptostreptococcales-Tissierellales	g__Anaerococcus	s__uncultured_bacterium	0.00156266	0.00282639	0	0	0	0	0	0	0	0	0	0	0	0	0	0	0	0	0.00156266	0	0	0	0	0	0	0	0	0	0	0
ASV_1477	d__Bacteria	p__Proteobacteria	c__Gammaproteobacteria	o__Burkholderiales	f__Comamonadaceae			0.00487776	0.00282639	0	0	0	0	0	0	0	0	0	0	0	0	0	0	0	0	0	0	0	0	0	0.00487776	0	0	0	0	0	0
ASV_1479	d__Bacteria	p__Proteobacteria	c__Gammaproteobacteria	o__Burkholderiales	f__Methylophilaceae			0.0097435	0.00282639	0	0	0	0	0	0	0	0	0	0	0	0	0	0	0	0	0	0	0	0	0	0	0	0	0	0	0.0097435	0
ASV_1480	d__Archaea	p__Nanoarchaeota	c__Nanoarchaeia	o__Woesearchaeales				0.00458358	0.00282639	0	0	0	0	0	0	0	0	0	0	0	0	0	0	0	0	0	0	0	0	0	0	0	0.00458358	0	0	0	0
ASV_1481	d__Bacteria	p__Caldisericota	c__Caldisericia	o__Caldisericales	f__Caldisericaceae	g__Caldisericum	s__uncultured_bacterium	0	0.00282639	0.00237204	0.000454351	0	0	0	0	0	0	0	0	0	0	0	0	0	0	0	0	0	0	0	0	0	0	0	0	0	0
ASV_1482	d__Bacteria	p__Bacteroidota	c__Bacteroidia	o__Cytophagales	f__Cytophagaceae	g__Cytophaga	s__uncultured_bacterium	0.00122872	0	0	0	0	0	0	0	0	0	0	0	0	0	0	0	0	0.00122872	0	0	0	0	0	0	0	0	0	0	0	0
ASV_1483	d__Bacteria	p__Gemmatimonadota	c__Gemmatimonadetes	o__Gemmatimonadales	f__Gemmatimonadaceae	g__Roseisolibacter	s__uncultured_bacterium	0.00122872	0.000224056	0	0	0	0	0	0	0	0	0	0	0	0	0	0	0	0.00122872	0	0	0	0	0	0	0	0	0	0	0	0
ASV_1484	d__Bacteria	p__Acidobacteriota	c__Acidobacteriae	o__Solibacterales	f__Solibacteraceae	g__Candidatus_Solibacter		0.00626309	0.000224056	0	0	0	0	0	0.000720396	0	0	0	0	0	0	0	0	0	0	0	0	0	0	0	0	0	0	0	0	2.29804e-05	0.00551972
ASV_1485	d__Archaea	p__Nanoarchaeota	c__Nanoarchaeia	o__Woesearchaeales	f__Woesearchaeales	g__Woesearchaeales		0.00579205	0.000224056	0	0	0	0	0	0	0	0	0	0	0	0	0	0	0	0	0	0	0	0	0	0	0	0	0	0.00579205	0	0
ASV_1486	d__Bacteria	p__Firmicutes	c__Clostridia	o__Oscillospirales	f__UCG-010	g__UCG-010	s__uncultured_bacterium	0.00881468	0.000224056	0	0	0	0	3.94488e-05	0	0	0	0	0	0	0	0	2.92812e-05	0	0	0	0	0	0	0	0	0	0	1.58125e-05	0	0.00868698	4.3163e-05
ASV_1487	d__Bacteria	p__Proteobacteria	c__Alphaproteobacteria	o__Sphingomonadales	f__Sphingomonadaceae	g__Sphingobium	s__uncultured_bacterium	0.00136921	0.000224056	0	0	0	0	0	0.000217467	0	0	0	0	0	0	0	0	0	0.00115174	0	0	0	0	0	0	0	0	0	0	0	0
ASV_1488	d__Bacteria	p__Proteobacteria	c__Gammaproteobacteria	o__Burkholderiales	f__Comamonadaceae	g__Hydrogenophaga		0	0.000224056	0	0	0	0	0	0	0	0	0	0	0	0	0	0	0	0	0	0	0	0	0	0	0	0	0	0	0	0
ASV_1489	d__Bacteria	p__Bacteroidota	c__Bacteroidia	o__Bacteroidales	f__Prevotellaceae	g__Prevotella		9.42649e-05	0.000224056	0	0	0	0	0	0	0	0	0	0	0	0	0	0	0	0	0	9.42649e-05	0	0	0	0	0	0	0	0	0	0
ASV_1490	d__Bacteria	p__Bacteroidota	c__Bacteroidia	o__Sphingobacteriales	f__Sphingobacteriaceae	g__Pedobacter		0.000260795	0.000224056	0	0	0	0	0	0	0	0	0	0.000260795	0	0	0	0	0	0	0	0	0	0	0	0	0	0	0	0	0	0
ASV_1491	d__Bacteria	p__Proteobacteria	c__Gammaproteobacteria	o__Burkholderiales				0.00189849	0.000224056	0	0	0	0	0	0	0	0	0	0	0	0	0	0	0	0.00186599	0	3.25013e-05	0	0	0	0	0	0	0	0	0	0
ASV_1492	d__Bacteria	p__Fusobacteriota	c__Fusobacteriia	o__Fusobacteriales	f__Leptotrichiaceae			0.00200565	0.000224056	0	0	0	0	3.94488e-05	0	0	3.00526e-05	0	0	0	1.49645e-05	0	0.00177444	0	0	0	0	0	0	0	0	0	0	0	0	0.000146739	0
ASV_1493	d__Bacteria	p__Firmicutes	c__Bacilli	o__Bacillales	f__Bacillaceae	g__Bacillus		0.00345519	0.000224056	0	0	0	0	0	0	0	0	0	0	0	0	0	0	0	0	0	0	0	0	0	0	0	0	0.00345519	0	0	0
ASV_1494	d__Bacteria	p__Actinobacteriota	c__Actinobacteria	o__Streptosporangiales	f__Streptosporangiaceae	g__Nonomuraea		0.00883721	0.000224056	0	0	0	0	0	0	0.00883721	0	0	0	0	0	0	0	0	0	0	0	0	0	0	0	0	0	0	0	0	0
ASV_1495	d__Bacteria	p__Proteobacteria	c__Alphaproteobacteria	o__Sphingomonadales	f__Sphingomonadaceae	g__Sphingobium		0.00121532	0.000224056	0	0	0	0	0	0	0	0	0	0	0	0.00121532	0	0	0	0	0	0	0	0	0	0	0	0	0	0	0	0
[truncated: 2,266 more rows]
